# Supplementary material for: The whole is larger than the sum of its parts: additive effects of SMS nudge bundles
Source: Frontiers journal article supplement (doi:10.3389/fcomm.2024.1298607), 2024-02-08
Supplement: Table_1.XLSX [file Table_1.XLSX]

## Sheet: AM
IDENTIFICADOR	CEDULA	AM/PM	Celular	Fecha de Creacion	Fecha de Finalizacion	MENSAJE ENVIADO	RESPUESTA RECIBIDA	FECHA RESPUESTA RECIBIDA	Fecha de ENVIO SEGUNDO MENSAJE	SEGUNDO MENSAJE ENVIADO	SEGUNDA RESPUESTA RECIBIDA	FECHA SEGUNDA RESPUESTA RECIBIDA	Fecha de ENVIO TERCER MENSAJE	TERCER MENSAJE ENVIADO
297370	13841733	AM	3004498610	2018-11-22 10:43:23	2018-11-22 10:43:23	Sus cesantias en el FNA pueden ser la primera cuota de una casa. Quiere saber mas? SIN COSTO, responda SI o NO	Pendiente	2018-11-22	2018-11-22
299705	14238467	AM	3157133500	2018-11-22 10:43:23	2018-11-22 10:43:23	CESAR Sea propietario! Sus cesantias en el FNA pueden ser la primera cuota de una casa. Quiere saber mas? SIN COSTO, responda SI o NO	Pendiente	2018-11-22	2018-11-22
306992	16609017	AM	3152811108	2018-11-22 10:43:23	2018-11-22 16:57:13	WALTER Sea propietario! Sus cesantias en el FNA pueden ser la primera cuota de una casa. Quiere saber mas? SIN COSTO, responda SI o NO	SI	2018-11-22	2018-11-22	Muchas gracias por su respuesta. Un asesor del fondo Nacional del Ahorro se comunicara con usted.
307271	16635282	AM	3206909893	2018-11-22 10:43:23	2018-11-22 10:43:23	CESAR Sus cesantias en el FNA pueden ser la primera cuota de una casa. En 2018 financiamos 9669 clientes como Ud. Quiere saber mas? SIN COSTO, responda SI o NO	Pendiente	2018-11-22	2018-11-22
307787	16694751	AM	3138531214	2018-11-22 10:43:23	2018-11-22 10:43:23	HAROLD Sea propietario! Sus cesantias en el FNA pueden ser la primera cuota de una casa. Quiere saber mas? SIN COSTO, responda SI o NO	Pendiente	2018-11-22	2018-11-22
311481	17076259	AM	3132926659	2018-11-22 10:43:23	2018-11-22 11:28:13	Sus cesantias en el FNA pueden ser la primera cuota de una casa. Hay subsidios disponibles, preguntelos. Quiere saber mas? SIN COSTO, responda SI o NO	SI	2018-11-22	2018-11-22	Muchas gracias por su respuesta. Un asesor del fondo Nacional del Ahorro se comunicara con usted.
329320	19151981	AM	3117334620	2018-11-22 10:43:23	2018-11-22 10:43:23	GERMAN Sea propietario! Sus cesantias en el FNA pueden ser la primera cuota de una casa. Quiere saber mas? SIN COSTO, responda SI o NO	Pendiente	2018-11-22	2018-11-22
336517	19322091	AM	3142412488	2018-11-22 10:43:23	2018-11-22 10:43:23	JAIME Sus cesantias en el FNA pueden ser la primera cuota de una casa. Hay subsidios disponibles, preguntelos. Quiere saber mas? SIN COSTO, responda SI o NO	Pendiente	2018-11-22	2018-11-22
2950883	1112765866	AM	3177924647	2018-11-22 10:43:23	2018-11-22 10:43:23	No deje pasar el tiempo. Sus cesantias en el FNA pueden ser la primera cuota de una casa. Quiere saber mas? SIN COSTO, responda SI o NO	Pendiente	2018-11-22	2018-11-22
2963933	31528068	AM	3113122396	2018-11-22 10:43:23	2018-11-22 10:43:24	No deje pasar el tiempo. Sus cesantias en el FNA pueden ser la primera cuota de una casa. Quiere saber mas? SIN COSTO, responda SI o NO	Pendiente	2018-11-22	2018-11-22
2964892	32938056	AM	3104216257	2018-11-22 10:43:23	2018-11-22 10:43:23	KATIUSKA No deje pasar el tiempo. Sus cesantias en el FNA pueden ser la primera cuota de una casa. Quiere saber mas? SIN COSTO, responda SI o NO	Pendiente	2018-11-22	2018-11-22
2967931	7722210	AM	3213905423	2018-11-22 10:43:23	2018-11-22 10:43:23	LEONARDO Sus cesantias en el FNA pueden ser la primera cuota de una casa en NEIVA. Quiere saber mas? SIN COSTO, responda SI o NO	Pendiente	2018-11-22	2018-11-22
2971015	9872141	AM	3163162085	2018-11-22 10:43:23	2018-11-22 10:43:23	Sus cesantias en el FNA pueden ser la primera cuota de una casa. Quiere saber mas? SIN COSTO, responda SI o NO	Pendiente	2018-11-22	2018-11-22
2978797	16777064	AM	3155162712	2018-11-22 10:43:23	2018-11-22 10:43:23	No deje pasar el tiempo. Sus cesantias en el FNA pueden ser la primera cuota de una casa. Quiere saber mas? SIN COSTO, responda SI o NO	Pendiente	2018-11-22	2018-11-22
2979004	91298718	AM	3138895686	2018-11-22 10:43:23	2018-11-22 10:43:23	ARNULFO Sus cesantias en el FNA pueden ser la primera cuota de una casa. En 2018 financiamos 9669 clientes como Ud. Quiere saber mas? SIN COSTO, responda SI o NO	Pendiente	2018-11-22	2018-11-22
2990929	74081204	AM	3213970663	2018-11-22 10:43:23	2018-11-22 10:43:23	BENJAMIN Sea propietario! Sus cesantias en el FNA pueden ser la primera cuota de una casa. Quiere saber mas? SIN COSTO, responda SI o NO	Pendiente	2018-11-22	2018-11-22
2991778	72302482	AM	3003198828	2018-11-22 10:43:23	2018-11-22 10:43:23	KETBYN No deje pasar el tiempo. Sus cesantias en el FNA pueden ser la primera cuota de una casa. Quiere saber mas? SIN COSTO, responda SI o NO	Pendiente	2018-11-22	2018-11-22
2993954	63367158	AM	3157910021	2018-11-22 10:43:23	2018-11-22 10:43:23	ANA Sus cesantias en el FNA pueden ser la primera cuota de una casa. En 2018 financiamos 9669 clientes como Ud. Quiere saber mas? SIN COSTO, responda SI o NO	Pendiente	2018-11-22	2018-11-22
2995081	16928572	AM	3206667014	2018-11-22 10:43:23	2018-11-22 10:43:23	LUIS Sea propietario! Sus cesantias en el FNA pueden ser la primera cuota de una casa. Quiere saber mas? SIN COSTO, responda SI o NO	Pendiente	2018-11-22	2018-11-22
3002160	12189909	AM	3133912099	2018-11-22 10:43:23	2018-11-22 10:43:24	No deje pasar el tiempo. Sus cesantias en el FNA pueden ser la primera cuota de una casa. Quiere saber mas? SIN COSTO, responda SI o NO	Pendiente	2018-11-22	2018-11-22
3005277	70161949	AM	3017890169	2018-11-22 10:43:23	2018-11-22 14:08:29	Sus cesantias en el FNA pueden ser la primera cuota de una casa. En 2018 financiamos 9669 clientes como Ud. Quiere saber mas? SIN COSTO, responda SI o NO	SI	2018-11-22	2018-11-22	Muchas gracias por su respuesta. Un asesor del fondo Nacional del Ahorro se comunicara con usted.
3010255	15174507	AM	3017743891	2018-11-22 10:43:23	2018-11-22 10:43:23	EDWIN Sea propietario! Sus cesantias en el FNA pueden ser la primera cuota de una casa. Quiere saber mas? SIN COSTO, responda SI o NO	Pendiente	2018-11-22	2018-11-22
3017781	8720597	AM	3183753178	2018-11-22 10:43:23	2018-11-22 10:43:23	No deje pasar el tiempo. Sus cesantias en el FNA pueden ser la primera cuota de una casa. Quiere saber mas? SIN COSTO, responda SI o NO	Pendiente	2018-11-22	2018-11-22
3021800	74861801	AM	3202146127	2018-11-22 10:43:23	2018-11-22 10:43:23	Sea propietario! Sus cesantias en el FNA pueden ser la primera cuota de una casa. Quiere saber mas? SIN COSTO, responda SI o NO	Pendiente	2018-11-22	2018-11-22
3033571	49791689	AM	3164532727	2018-11-22 10:43:23	2018-11-22 10:43:23	No deje pasar el tiempo. Sus cesantias en el FNA pueden ser la primera cuota de una casa. Quiere saber mas? SIN COSTO, responda SI o NO	Pendiente	2018-11-22	2018-11-22
3035914	93402569	AM	3125722424	2018-11-22 10:43:23	2018-11-22 10:43:23	WALTER Sus cesantias en el FNA pueden ser la primera cuota de una casa. En 2018 financiamos 9669 clientes como Ud. Quiere saber mas? SIN COSTO, responda SI o NO	Pendiente	2018-11-22	2018-11-22
3038197	16662216	AM	3154113067	2018-11-22 10:43:23	2018-11-22 10:43:23	Sus cesantias en el FNA pueden ser la primera cuota de una casa. Hay subsidios disponibles, preguntelos. Quiere saber mas? SIN COSTO, responda SI o NO	Pendiente	2018-11-22	2018-11-22
3040933	1049611541	AM	3142728911	2018-11-22 10:43:23	2018-11-22 10:43:23	LINDA Sus cesantias en el FNA pueden ser la primera cuota de una casa en TUNJA. Quiere saber mas? SIN COSTO, responda SI o NO	Pendiente	2018-11-22	2018-11-22
11348267	43907396	AM	3146412830	2018-11-22 10:43:23	2018-11-22 10:43:23	ELIANA Sus cesantias en el FNA pueden ser la primera cuota de una casa en MEDELLIN. Quiere saber mas? SIN COSTO, responda SI o NO	Pendiente	2018-11-22	2018-11-22
11357880	32781248	AM	3053537520	2018-11-22 10:43:23	2018-11-22 10:43:24	ALEXANDRA Sus cesantias en el FNA pueden ser la primera cuota de una casa. Hay subsidios disponibles, preguntelos. Quiere saber mas? SIN COSTO, responda SI o NO	Pendiente	2018-11-22	2018-11-22
11372544	43665496	AM	3012026188	2018-11-22 10:43:23	2018-11-22 11:09:41	LIGIA Sea propietario! Sus cesantias en el FNA pueden ser la primera cuota de una casa. Quiere saber mas? SIN COSTO, responda SI o NO	Buenos dias. Ya solicite un prestamo. Estoy esperando la aprobacion. Gracias	2018-11-22	2018-11-22	No entendi. Envie de nuevo SI o NO sin costo. Recuerde que con el Fondo Nacional del Ahorro esta mas cerca de ser porpietario
11385872	66880787	AM	3177771337	2018-11-22 10:43:23	2018-11-22 10:43:23	No deje pasar el tiempo. Sus cesantias en el FNA pueden ser la primera cuota de una casa. Quiere saber mas? SIN COSTO, responda SI o NO	Pendiente	2018-11-22	2018-11-22
11393401	33377132	AM	3112061820	2018-11-22 10:43:23	2018-11-22 10:43:23	Sus cesantias en el FNA pueden ser la primera cuota de una casa en TUNJA. Quiere saber mas? SIN COSTO, responda SI o NO	Pendiente	2018-11-22	2018-11-22
11394660	16691779	AM	3175520161	2018-11-22 10:43:23	2018-11-22 10:43:23	Sus cesantias en el FNA pueden ser la primera cuota de una casa para su familia. Quiere saber mas? SIN COSTO, responda SI o NO	Pendiente	2018-11-22	2018-11-22
11407720	64576906	AM	3106476643	2018-11-22 10:43:23	2018-11-22 10:43:23	Sus cesantias en el FNA pueden ser la primera cuota de una casa. En 2018 financiamos 9669 clientes como Ud. Quiere saber mas? SIN COSTO, responda SI o NO	Pendiente	2018-11-22	2018-11-22
249946	5274980	AM	3146629192	2018-11-22 10:43:23	2018-11-22 10:44:31	JAVIER Sus cesantias en el FNA pueden ser la primera cuota de una casa en PASTO. Quiere saber mas? SIN COSTO, responda SI o NO	SI	2018-11-22	2018-11-22	Muchas gracias por su respuesta. Un asesor del fondo Nacional del Ahorro se comunicara con usted.
254002	5830636	AM	3116307332	2018-11-22 10:43:23	2018-11-22 10:43:23	FABIO No deje pasar el tiempo. Sus cesantias en el FNA pueden ser la primera cuota de una casa. Quiere saber mas? SIN COSTO, responda SI o NO	Pendiente	2018-11-22	2018-11-22
260049	6755519	AM	3102081330	2018-11-22 10:43:23	2018-11-22 10:43:23	Sus cesantias en el FNA pueden ser la primera cuota de una casa en TUNJA. Quiere saber mas? SIN COSTO, responda SI o NO	Pendiente	2018-11-22	2018-11-22
260412	6760853	AM	3106965135	2018-11-22 10:43:23	2018-11-22 10:43:23	JAVIER Sus cesantias en el FNA pueden ser la primera cuota de una casa en TUNJA. Quiere saber mas? SIN COSTO, responda SI o NO	Pendiente	2018-11-22	2018-11-22
260988	6773546	AM	3005243781	2018-11-22 10:43:23	2018-11-22 10:43:24	Sus cesantias en el FNA pueden ser la primera cuota de una casa. En 2018 financiamos 9669 clientes como Ud. Quiere saber mas? SIN COSTO, responda SI o NO	Pendiente	2018-11-22	2018-11-22
262150	6873549	AM	3157441058	2018-11-22 10:43:23	2018-11-22 10:43:23	No deje pasar el tiempo. Sus cesantias en el FNA pueden ser la primera cuota de una casa. Quiere saber mas? SIN COSTO, responda SI o NO	Pendiente	2018-11-22	2018-11-22
270793	8663993	AM	3205423833	2018-11-22 10:43:23	2018-11-22 10:43:23	Sea propietario! Sus cesantias en el FNA pueden ser la primera cuota de una casa. Quiere saber mas? SIN COSTO, responda SI o NO	Pendiente	2018-11-22	2018-11-22
272004	8731441	AM	3155566689	2018-11-22 10:43:23	2018-11-22 10:43:23	Sus cesantias en el FNA pueden ser la primera cuota de una casa. Hay subsidios disponibles, preguntelos. Quiere saber mas? SIN COSTO, responda SI o NO	Pendiente	2018-11-22	2018-11-22
273802	9084774	AM	3015755538	2018-11-22 10:43:23	2018-11-22 10:43:23	DAVID Sus cesantias en el FNA pueden ser la primera cuota de una casa. Hay subsidios disponibles, preguntelos. Quiere saber mas? SIN COSTO, responda SI o NO	Pendiente	2018-11-22	2018-11-22
275183	9465398	AM	3118373171	2018-11-22 10:43:23	2018-11-22 10:43:23	LUIS Sea propietario! Sus cesantias en el FNA pueden ser la primera cuota de una casa. Quiere saber mas? SIN COSTO, responda SI o NO	Pendiente	2018-11-22	2018-11-22
275616	9522316	AM	3112601611	2018-11-22 10:43:23	2018-11-22 10:43:23	SAMUEL Sus cesantias en el FNA pueden ser la primera cuota de una casa. En 2018 financiamos 9669 clientes como Ud. Quiere saber mas? SIN COSTO, responda SI o NO	Pendiente	2018-11-22	2018-11-22
278789	10231441	AM	3004773219	2018-11-22 10:43:23	2018-11-22 10:43:23	JORGE No deje pasar el tiempo. Sus cesantias en el FNA pueden ser la primera cuota de una casa. Quiere saber mas? SIN COSTO, responda SI o NO	Pendiente	2018-11-22	2018-11-22
279688	10264163	AM	3117258319	2018-11-22 10:43:23	2018-11-22 10:43:23	Sus cesantias en el FNA pueden ser la primera cuota de una casa. En 2018 financiamos 9669 clientes como Ud. Quiere saber mas? SIN COSTO, responda SI o NO	Pendiente	2018-11-22	2018-11-22
281551	10531088	AM	3168742308	2018-11-22 10:43:23	2018-11-22 10:55:14	Sus cesantias en el FNA pueden ser la primera cuota de una casa en POPAYAN. Quiere saber mas? SIN COSTO, responda SI o NO	SI	2018-11-22	2018-11-22	Muchas gracias por su respuesta. Un asesor del fondo Nacional del Ahorro se comunicara con usted.
282116	10542780	AM	3164693700	2018-11-22 10:43:23	2018-11-22 10:43:23	JAVIER Sea propietario! Sus cesantias en el FNA pueden ser la primera cuota de una casa. Quiere saber mas? SIN COSTO, responda SI o NO	Pendiente	2018-11-22	2018-11-22
286586	12111198	AM	3203037764	2018-11-22 10:43:23	2018-11-22 10:43:23	URIEL Sea propietario! Sus cesantias en el FNA pueden ser la primera cuota de una casa. Quiere saber mas? SIN COSTO, responda SI o NO	Pendiente	2018-11-22	2018-11-22
288952	12538612	AM	3014158228	2018-11-22 10:43:23	2018-11-22 11:24:45	PLUTARCO Sus cesantias en el FNA pueden ser la primera cuota de una casa para su familia. Quiere saber mas? SIN COSTO, responda SI o NO	SI	2018-11-22	2018-11-22	Muchas gracias por su respuesta. Un asesor del fondo Nacional del Ahorro se comunicara con usted.
289043	12540263	AM	3104559300	2018-11-22 10:43:23	2018-11-22 10:43:23	Sus cesantias en el FNA pueden ser la primera cuota de una casa. Quiere saber mas? SIN COSTO, responda SI o NO	Pendiente	2018-11-22	2018-11-22
295748	13473271	AM	3203367926	2018-11-22 10:43:23	2018-11-22 10:43:23	Sea propietario! Sus cesantias en el FNA pueden ser la primera cuota de una casa. Quiere saber mas? SIN COSTO, responda SI o NO	Pendiente	2018-11-22	2018-11-22
450678	49731687	AM	3164519660	2018-11-22 10:43:23	2018-11-22 10:43:23	Sus cesantias en el FNA pueden ser la primera cuota de una casa en VALLEDUPAR. Quiere saber mas? SIN COSTO, responda SI o NO	Pendiente	2018-11-22	2018-11-22
460882	51911926	AM	3002703360	2018-11-22 10:43:23	2018-11-22 10:43:23	MARIA Sea propietario! Sus cesantias en el FNA pueden ser la primera cuota de una casa. Quiere saber mas? SIN COSTO, responda SI o NO	Pendiente	2018-11-22	2018-11-22
461389	51942181	AM	3102345879	2018-11-22 10:43:23	2018-11-22 10:43:23	MIRIAM Sus cesantias en el FNA pueden ser la primera cuota de una casa. Hay subsidios disponibles, preguntelos. Quiere saber mas? SIN COSTO, responda SI o NO	Pendiente	2018-11-22	2018-11-22
463904	52111090	AM	3118786872	2018-11-22 10:43:23	2018-11-22 10:49:24	ANGELA Sus cesantias en el FNA pueden ser la primera cuota de una casa. En 2018 financiamos 9669 clientes como Ud. Quiere saber mas? SIN COSTO, responda SI o NO	SI	2018-11-22	2018-11-22	Muchas gracias por su respuesta. Un asesor del fondo Nacional del Ahorro se comunicara con usted.
467554	57429518	AM	3178409627	2018-11-22 10:43:23	2018-11-22 10:43:23	Sus cesantias en el FNA pueden ser la primera cuota de una casa. Quiere saber mas? SIN COSTO, responda SI o NO	Pendiente	2018-11-22	2018-11-22
468472	60292989	AM	3153740446	2018-11-22 10:43:23	2018-11-22 10:43:23	DORIS Sea propietario! Sus cesantias en el FNA pueden ser la primera cuota de una casa. Quiere saber mas? SIN COSTO, responda SI o NO	Pendiente	2018-11-22	2018-11-22
468813	60323379	AM	3195286943	2018-11-22 10:43:23	2018-11-22 10:43:23	No deje pasar el tiempo. Sus cesantias en el FNA pueden ser la primera cuota de una casa. Quiere saber mas? SIN COSTO, responda SI o NO	Pendiente	2018-11-22	2018-11-22
469707	63307018	AM	3002665089	2018-11-22 10:43:23	2018-11-22 10:43:23	Sus cesantias en el FNA pueden ser la primera cuota de una casa para su familia. Quiere saber mas? SIN COSTO, responda SI o NO	Pendiente	2018-11-22	2018-11-22
470366	63456400	AM	3104972556	2018-11-22 10:43:23	2018-11-22 10:51:54	MARIA Sus cesantias en el FNA pueden ser la primera cuota de una casa para su familia. Quiere saber mas? SIN COSTO, responda SI o NO	SI	2018-11-22	2018-11-22	Muchas gracias por su respuesta. Un asesor del fondo Nacional del Ahorro se comunicara con usted.
471640	65736874	AM	3153908382	2018-11-22 10:43:23	2018-11-22 10:43:23	MARIA Sea propietario! Sus cesantias en el FNA pueden ser la primera cuota de una casa. Quiere saber mas? SIN COSTO, responda SI o NO	Pendiente	2018-11-22	2018-11-22
472499	66816001	AM	3113006491	2018-11-22 10:43:23	2018-11-22 10:43:23	CONSTANZA Sus cesantias en el FNA pueden ser la primera cuota de una casa en CALI. Quiere saber mas? SIN COSTO, responda SI o NO	Pendiente	2018-11-22	2018-11-22
473556	70041491	AM	3165236806	2018-11-22 10:43:23	2018-11-22 10:43:23	Sus cesantias en el FNA pueden ser la primera cuota de una casa para su familia. Quiere saber mas? SIN COSTO, responda SI o NO	Pendiente	2018-11-22	2018-11-22
475214	70875709	AM	3146792363	2018-11-22 10:43:23	2018-11-22 17:59:35	ELKIN Sus cesantias en el FNA pueden ser la primera cuota de una casa. Hay subsidios disponibles, preguntelos. Quiere saber mas? SIN COSTO, responda SI o NO	SI	2018-11-22	2018-11-22	Muchas gracias por su respuesta. Un asesor del fondo Nacional del Ahorro se comunicara con usted.
475429	71579651	AM	3104702394	2018-11-22 10:43:23	2018-11-22 10:43:23	Sus cesantias en el FNA pueden ser la primera cuota de una casa para su familia. Quiere saber mas? SIN COSTO, responda SI o NO	Pendiente	2018-11-22	2018-11-22
478957	74337234	AM	3103431597	2018-11-22 10:43:23	2018-11-22 10:43:23	JOSELYN No deje pasar el tiempo. Sus cesantias en el FNA pueden ser la primera cuota de una casa. Quiere saber mas? SIN COSTO, responda SI o NO	Pendiente	2018-11-22	2018-11-22
479585	76312642	AM	3137047937	2018-11-22 10:43:23	2018-11-22 10:43:23	FABIAN Sus cesantias en el FNA pueden ser la primera cuota de una casa. En 2018 financiamos 9669 clientes como Ud. Quiere saber mas? SIN COSTO, responda SI o NO	Pendiente	2018-11-22	2018-11-22
483373	79200020	AM	3208220071	2018-11-22 10:43:23	2018-11-22 10:43:23	No deje pasar el tiempo. Sus cesantias en el FNA pueden ser la primera cuota de una casa. Quiere saber mas? SIN COSTO, responda SI o NO	Pendiente	2018-11-22	2018-11-22
493118	79762850	AM	3153984711	2018-11-22 10:43:23	2018-11-22 10:43:23	Sus cesantias en el FNA pueden ser la primera cuota de una casa. En 2018 financiamos 9669 clientes como Ud. Quiere saber mas? SIN COSTO, responda SI o NO	Pendiente	2018-11-22	2018-11-22
495117	80439606	AM	3145815962	2018-11-22 10:43:23	2018-11-22 10:43:23	MARCELO No deje pasar el tiempo. Sus cesantias en el FNA pueden ser la primera cuota de una casa. Quiere saber mas? SIN COSTO, responda SI o NO	Pendiente	2018-11-22	2018-11-22
500120	91274029	AM	3144890151	2018-11-22 10:43:23	2018-11-22 10:56:26	GUILLERMO Sus cesantias en el FNA pueden ser la primera cuota de una casa en BUCARAMANGA. Quiere saber mas? SIN COSTO, responda SI o NO	SI	2018-11-22	2018-11-22	Muchas gracias por su respuesta. Un asesor del fondo Nacional del Ahorro se comunicara con usted.
502214	93379131	AM	3005551381	2018-11-22 10:43:23	2018-11-22 10:43:23	GERMAN No deje pasar el tiempo. Sus cesantias en el FNA pueden ser la primera cuota de una casa. Quiere saber mas? SIN COSTO, responda SI o NO	Pendiente	2018-11-22	2018-11-22
1225762	16829007	AM	3137447625	2018-11-22 10:43:23	2018-11-22 10:43:23	EVELIO Sus cesantias en el FNA pueden ser la primera cuota de una casa para su familia. Quiere saber mas? SIN COSTO, responda SI o NO	Pendiente	2018-11-22	2018-11-22
1228003	43497087	AM	3128968342	2018-11-22 10:43:23	2018-11-22 10:43:23	IRMA Sea propietario! Sus cesantias en el FNA pueden ser la primera cuota de una casa. Quiere saber mas? SIN COSTO, responda SI o NO	Pendiente	2018-11-22	2018-11-22
1230468	72158019	AM	3006968440	2018-11-22 10:43:23	2018-11-22 10:43:23	Sus cesantias en el FNA pueden ser la primera cuota de una casa. En 2018 financiamos 9669 clientes como Ud. Quiere saber mas? SIN COSTO, responda SI o NO	Pendiente	2018-11-22	2018-11-22
1266191	37547568	AM	3124502688	2018-11-22 10:43:23	2018-11-22 10:43:23	Sus cesantias en el FNA pueden ser la primera cuota de una casa en BUCARAMANGA. Quiere saber mas? SIN COSTO, responda SI o NO	Pendiente	2018-11-22	2018-11-22
1275113	1095792316	AM	3183822155	2018-11-22 10:43:23	2018-11-22 10:43:23	Sus cesantias en el FNA pueden ser la primera cuota de una casa en BUCARAMANGA. Quiere saber mas? SIN COSTO, responda SI o NO	Pendiente	2018-11-22	2018-11-22
2654854	36542970	AM	3126943361	2018-11-22 10:43:23	2018-11-22 10:43:23	Sea propietario! Sus cesantias en el FNA pueden ser la primera cuota de una casa. Quiere saber mas? SIN COSTO, responda SI o NO	Pendiente	2018-11-22	2018-11-22
2685255	72186172	AM	3103628151	2018-11-22 10:43:23	2018-11-22 10:43:23	Sus cesantias en el FNA pueden ser la primera cuota de una casa. Hay subsidios disponibles, preguntelos. Quiere saber mas? SIN COSTO, responda SI o NO	Pendiente	2018-11-22	2018-11-22
2703439	1085250188	AM	3104551528	2018-11-22 10:43:23	2018-11-22 10:43:23	Sus cesantias en el FNA pueden ser la primera cuota de una casa. Quiere saber mas? SIN COSTO, responda SI o NO	Pendiente	2018-11-22	2018-11-22
2718903	28955256	AM	3012831039	2018-11-22 10:43:23	2018-11-22 10:43:23	No deje pasar el tiempo. Sus cesantias en el FNA pueden ser la primera cuota de una casa. Quiere saber mas? SIN COSTO, responda SI o NO	Pendiente	2018-11-22	2018-11-22
2728256	27895685	AM	3125683829	2018-11-22 10:43:23	2018-11-22 10:43:23	Sus cesantias en el FNA pueden ser la primera cuota de una casa. Hay subsidios disponibles, preguntelos. Quiere saber mas? SIN COSTO, responda SI o NO	Pendiente	2018-11-22	2018-11-22
2728338	53050798	AM	3103337799	2018-11-22 10:43:23	2018-11-22 10:43:23	Sus cesantias en el FNA pueden ser la primera cuota de una casa en BUCARAMANGA. Quiere saber mas? SIN COSTO, responda SI o NO	Pendiente	2018-11-22	2018-11-22
2728375	1130615648	AM	3204171281	2018-11-22 10:43:23	2018-11-22 10:43:23	Sus cesantias en el FNA pueden ser la primera cuota de una casa. En 2018 financiamos 9669 clientes como Ud. Quiere saber mas? SIN COSTO, responda SI o NO	Pendiente	2018-11-22	2018-11-22
2738275	7179157	AM	3203144817	2018-11-22 10:43:23	2018-11-22 10:43:23	OSCAR Sea propietario! Sus cesantias en el FNA pueden ser la primera cuota de una casa. Quiere saber mas? SIN COSTO, responda SI o NO	Pendiente	2018-11-22	2018-11-22
2750288	37941318	AM	3186423109	2018-11-22 10:43:23	2018-11-22 12:19:55	YAQUELIN No deje pasar el tiempo. Sus cesantias en el FNA pueden ser la primera cuota de una casa. Quiere saber mas? SIN COSTO, responda SI o NO	SI	2018-11-22	2018-11-22	Muchas gracias por su respuesta. Un asesor del fondo Nacional del Ahorro se comunicara con usted.
3952413	28554970	AM	3175751390	2018-11-22 10:43:23	2018-11-22 10:43:23	Sea propietario! Sus cesantias en el FNA pueden ser la primera cuota de una casa. Quiere saber mas? SIN COSTO, responda SI o NO	Pendiente	2018-11-22	2018-11-22
3973140	65772375	AM	3108466315	2018-11-22 10:43:23	2018-11-22 10:43:23	Sus cesantias en el FNA pueden ser la primera cuota de una casa en IBAGUE. Quiere saber mas? SIN COSTO, responda SI o NO	Pendiente	2018-11-22	2018-11-22
3989060	71739532	AM	3148577469	2018-11-22 10:43:23	2018-11-22 10:43:23	LUIS Sea propietario! Sus cesantias en el FNA pueden ser la primera cuota de una casa. Quiere saber mas? SIN COSTO, responda SI o NO	Pendiente	2018-11-22	2018-11-22
3990479	27089742	AM	3217229994	2018-11-22 10:43:23	2018-11-22 10:43:23	DIANA Sus cesantias en el FNA pueden ser la primera cuota de una casa en PASTO. Quiere saber mas? SIN COSTO, responda SI o NO	Pendiente	2018-11-22	2018-11-22
3997858	73206325	AM	3135429132	2018-11-22 10:43:23	2018-11-22 10:48:40	FRANKLIN Sus cesantias en el FNA pueden ser la primera cuota de una casa. Hay subsidios disponibles, preguntelos. Quiere saber mas? SIN COSTO, responda SI o NO	SI	2018-11-22	2018-11-22	Muchas gracias por su respuesta. Un asesor del fondo Nacional del Ahorro se comunicara con usted.
4001049	1090367843	AM	3124981602	2018-11-22 10:43:23	2018-11-22 10:43:23	Sus cesantias en el FNA pueden ser la primera cuota de una casa. Quiere saber mas? SIN COSTO, responda SI o NO	Pendiente	2018-11-22	2018-11-22
4020939	71263269	AM	3007841515	2018-11-22 10:43:23	2018-11-22 10:43:23	ANDRES No deje pasar el tiempo. Sus cesantias en el FNA pueden ser la primera cuota de una casa. Quiere saber mas? SIN COSTO, responda SI o NO	Pendiente	2018-11-22	2018-11-22
4021948	72164492	AM	3135917517	2018-11-22 10:43:23	2018-11-22 10:43:23	JOSE Sus cesantias en el FNA pueden ser la primera cuota de una casa. En 2018 financiamos 9669 clientes como Ud. Quiere saber mas? SIN COSTO, responda SI o NO	Pendiente	2018-11-22	2018-11-22
4025127	70351575	AM	3104281314	2018-11-22 10:43:23	2018-11-22 10:43:23	ADOLFO Sus cesantias en el FNA pueden ser la primera cuota de una casa para su familia. Quiere saber mas? SIN COSTO, responda SI o NO	Pendiente	2018-11-22	2018-11-22
4037041	27396122	AM	3148081387	2018-11-22 10:43:23	2018-11-22 10:43:23	Sus cesantias en el FNA pueden ser la primera cuota de una casa. En 2018 financiamos 9669 clientes como Ud. Quiere saber mas? SIN COSTO, responda SI o NO	Pendiente	2018-11-22	2018-11-22
4047248	88222121	AM	3157104995	2018-11-22 10:43:23	2018-11-22 10:43:23	JAIRO Sus cesantias en el FNA pueden ser la primera cuota de una casa. En 2018 financiamos 9669 clientes como Ud. Quiere saber mas? SIN COSTO, responda SI o NO	Pendiente	2018-11-22	2018-11-22
6756787	1037572878	AM	3043765057	2018-11-22 10:43:23	2018-11-22 10:43:23	Sus cesantias en el FNA pueden ser la primera cuota de una casa en MEDELLIN. Quiere saber mas? SIN COSTO, responda SI o NO	Pendiente	2018-11-22	2018-11-22
6778216	16718898	AM	3107676531	2018-11-22 10:43:23	2018-11-22 10:43:23	Sus cesantias en el FNA pueden ser la primera cuota de una casa en CALI. Quiere saber mas? SIN COSTO, responda SI o NO	Pendiente	2018-11-22	2018-11-22
6789285	7250264	AM	3158444719	2018-11-22 10:43:23	2018-11-22 10:43:23	Sea propietario! Sus cesantias en el FNA pueden ser la primera cuota de una casa. Quiere saber mas? SIN COSTO, responda SI o NO	Pendiente	2018-11-22	2018-11-22
6792308	343128	AM	3017488480	2018-11-22 10:43:23	2018-11-22 10:43:23	Sea propietario! Sus cesantias en el FNA pueden ser la primera cuota de una casa. Quiere saber mas? SIN COSTO, responda SI o NO	Pendiente	2018-11-22	2018-11-22
6797071	50897118	AM	3145210606	2018-11-22 10:43:23	2018-11-22 10:43:23	Sus cesantias en el FNA pueden ser la primera cuota de una casa en MONTERIA. Quiere saber mas? SIN COSTO, responda SI o NO	Pendiente	2018-11-22	2018-11-22
6807958	16791064	AM	3168470058	2018-11-22 10:43:23	2018-11-23 10:35:03	Sus cesantias en el FNA pueden ser la primera cuota de una casa. Hay subsidios disponibles, preguntelos. Quiere saber mas? SIN COSTO, responda SI o NO	SI	2018-11-22	2018-11-22	Muchas gracias por su respuesta. Un asesor del fondo Nacional del Ahorro se comunicara con usted.
6808883	38558134	AM	3127942086	2018-11-22 10:43:23	2018-11-22 10:43:23	Sus cesantias en el FNA pueden ser la primera cuota de una casa. Quiere saber mas? SIN COSTO, responda SI o NO	Pendiente	2018-11-22	2018-11-22
6820688	1128438929	AM	3005331550	2018-11-22 10:43:23	2018-11-22 10:43:23	Sus cesantias en el FNA pueden ser la primera cuota de una casa. En 2018 financiamos 9669 clientes como Ud. Quiere saber mas? SIN COSTO, responda SI o NO	Pendiente	2018-11-22	2018-11-22
6829857	1143856363	AM	3206101739	2018-11-22 10:43:23	2018-11-22 10:43:23	LEIDY Sus cesantias en el FNA pueden ser la primera cuota de una casa. En 2018 financiamos 9669 clientes como Ud. Quiere saber mas? SIN COSTO, responda SI o NO	Pendiente	2018-11-22	2018-11-22
6833438	12560271	AM	3157501815	2018-11-22 10:43:23	2018-11-22 10:43:24	Sea propietario! Sus cesantias en el FNA pueden ser la primera cuota de una casa. Quiere saber mas? SIN COSTO, responda SI o NO	Pendiente	2018-11-22	2018-11-22
6835615	19178565	AM	3154110550	2018-11-22 10:43:23	2018-11-22 10:43:24	No deje pasar el tiempo. Sus cesantias en el FNA pueden ser la primera cuota de una casa. Quiere saber mas? SIN COSTO, responda SI o NO	Pendiente	2018-11-22	2018-11-22
533147	73123286	AM	3157679631	2018-11-22 10:43:23	2018-11-22 10:43:24	Sus cesantias en el FNA pueden ser la primera cuota de una casa para su familia. Quiere saber mas? SIN COSTO, responda SI o NO	Pendiente	2018-11-22	2018-11-22
534344	76308955	AM	3117565847	2018-11-22 10:43:23	2018-11-22 10:43:24	ORLANDO Sus cesantias en el FNA pueden ser la primera cuota de una casa. En 2018 financiamos 9669 clientes como Ud. Quiere saber mas? SIN COSTO, responda SI o NO	Pendiente	2018-11-22	2018-11-22
540029	10098494	AM	3007733694	2018-11-22 10:43:23	2018-11-22 10:43:24	Sus cesantias en el FNA pueden ser la primera cuota de una casa. Hay subsidios disponibles, preguntelos. Quiere saber mas? SIN COSTO, responda SI o NO	Pendiente	2018-11-22	2018-11-22
541050	91263775	AM	3005681846	2018-11-22 10:43:23	2018-11-22 10:43:24	MANUEL Sea propietario! Sus cesantias en el FNA pueden ser la primera cuota de una casa. Quiere saber mas? SIN COSTO, responda SI o NO	Pendiente	2018-11-22	2018-11-22
544105	74321473	AM	3104400110	2018-11-22 10:43:23	2018-11-22 10:43:24	Sus cesantias en el FNA pueden ser la primera cuota de una casa. Hay subsidios disponibles, preguntelos. Quiere saber mas? SIN COSTO, responda SI o NO	Pendiente	2018-11-22	2018-11-22
546410	40445891	AM	3112362610	2018-11-22 10:43:23	2018-11-22 10:43:24	DIANA Sus cesantias en el FNA pueden ser la primera cuota de una casa. Hay subsidios disponibles, preguntelos. Quiere saber mas? SIN COSTO, responda SI o NO	Pendiente	2018-11-22	2018-11-22
548091	17321515	AM	3132818311	2018-11-22 10:43:23	2018-11-22 10:43:24	EDILBERTO Sea propietario! Sus cesantias en el FNA pueden ser la primera cuota de una casa. Quiere saber mas? SIN COSTO, responda SI o NO	Pendiente	2018-11-22	2018-11-22
548127	25872469	AM	3114395728	2018-11-22 10:43:23	2018-11-22 10:43:24	EMILSE Sus cesantias en el FNA pueden ser la primera cuota de una casa para su familia. Quiere saber mas? SIN COSTO, responda SI o NO	Pendiente	2018-11-22	2018-11-22
548366	72139340	AM	3016216163	2018-11-22 10:43:23	2018-11-22 10:43:24	PEDRO Sus cesantias en el FNA pueden ser la primera cuota de una casa para su familia. Quiere saber mas? SIN COSTO, responda SI o NO	Pendiente	2018-11-22	2018-11-22
548905	21243869	AM	3108783786	2018-11-22 10:43:23	2018-11-22 10:43:24	Sus cesantias en el FNA pueden ser la primera cuota de una casa. En 2018 financiamos 9669 clientes como Ud. Quiere saber mas? SIN COSTO, responda SI o NO	Pendiente	2018-11-22	2018-11-22
549433	59837210	AM	3116598030	2018-11-22 10:43:23	2018-11-22 10:43:24	Sus cesantias en el FNA pueden ser la primera cuota de una casa para su familia. Quiere saber mas? SIN COSTO, responda SI o NO	Pendiente	2018-11-22	2018-11-22
550989	31179252	AM	3128046565	2018-11-22 10:43:23	2018-11-22 10:43:24	ANA Sus cesantias en el FNA pueden ser la primera cuota de una casa en CALI. Quiere saber mas? SIN COSTO, responda SI o NO	Pendiente	2018-11-22	2018-11-22
552352	19104988	AM	3157512410	2018-11-22 10:43:23	2018-11-22 10:43:24	RAFAEL Sea propietario! Sus cesantias en el FNA pueden ser la primera cuota de una casa. Quiere saber mas? SIN COSTO, responda SI o NO	Pendiente	2018-11-22	2018-11-22
552733	45512089	AM	3126680751	2018-11-22 10:43:23	2018-11-22 10:43:24	Sus cesantias en el FNA pueden ser la primera cuota de una casa. Quiere saber mas? SIN COSTO, responda SI o NO	Pendiente	2018-11-22	2018-11-22
552838	73130447	AM	3107035233	2018-11-22 10:43:23	2018-11-22 10:43:24	Sus cesantias en el FNA pueden ser la primera cuota de una casa. Quiere saber mas? SIN COSTO, responda SI o NO	Pendiente	2018-11-22	2018-11-22
555363	8496536	AM	3017507951	2018-11-22 10:43:23	2018-11-22 10:43:24	HENRY Sus cesantias en el FNA pueden ser la primera cuota de una casa en BARRANQUILLA. Quiere saber mas? SIN COSTO, responda SI o NO	Pendiente	2018-11-22	2018-11-22
555664	98343812	AM	3134213863	2018-11-22 10:43:23	2018-11-22 10:43:24	Sus cesantias en el FNA pueden ser la primera cuota de una casa en PASTO. Quiere saber mas? SIN COSTO, responda SI o NO	Pendiente	2018-11-22	2018-11-22
556241	22419429	AM	3045499832	2018-11-22 10:43:23	2018-11-22 10:43:24	Sus cesantias en el FNA pueden ser la primera cuota de una casa en BARRANQUILLA. Quiere saber mas? SIN COSTO, responda SI o NO	Pendiente	2018-11-22	2018-11-22
398245	31964364	AM	3168814127	2018-11-22 10:43:23	2018-11-22 10:43:24	No deje pasar el tiempo. Sus cesantias en el FNA pueden ser la primera cuota de una casa. Quiere saber mas? SIN COSTO, responda SI o NO	Pendiente	2018-11-22	2018-11-22
401475	32654781	AM	3008378855	2018-11-22 10:43:23	2018-11-22 10:43:24	MARIA Sus cesantias en el FNA pueden ser la primera cuota de una casa para su familia. Quiere saber mas? SIN COSTO, responda SI o NO	Pendiente	2018-11-22	2018-11-22
402757	32810308	AM	3106243637	2018-11-22 10:43:23	2018-11-22 10:43:24	Sus cesantias en el FNA pueden ser la primera cuota de una casa en MONTERIA. Quiere saber mas? SIN COSTO, responda SI o NO	Pendiente	2018-11-22	2018-11-22
406028	34527753	AM	3154675938	2018-11-22 10:43:23	2018-11-22 10:43:24	Sus cesantias en el FNA pueden ser la primera cuota de una casa. Quiere saber mas? SIN COSTO, responda SI o NO	Pendiente	2018-11-22	2018-11-22
406188	34529539	AM	3155806993	2018-11-22 10:43:23	2018-11-22 10:43:24	Sus cesantias en el FNA pueden ser la primera cuota de una casa. Hay subsidios disponibles, preguntelos. Quiere saber mas? SIN COSTO, responda SI o NO	Pendiente	2018-11-22	2018-11-22
407219	34556868	AM	3168238184	2018-11-22 10:43:23	2018-11-22 10:43:24	SANDRA No deje pasar el tiempo. Sus cesantias en el FNA pueden ser la primera cuota de una casa. Quiere saber mas? SIN COSTO, responda SI o NO	Pendiente	2018-11-22	2018-11-22
409340	35466338	AM	3003719327	2018-11-22 10:43:23	2018-11-22 10:43:24	Sus cesantias en el FNA pueden ser la primera cuota de una casa en BARRANQUILLA. Quiere saber mas? SIN COSTO, responda SI o NO	Pendiente	2018-11-22	2018-11-22
413325	36544141	AM	3006617048	2018-11-22 10:43:23	2018-11-22 10:43:24	Sus cesantias en el FNA pueden ser la primera cuota de una casa en BARRANQUILLA. Quiere saber mas? SIN COSTO, responda SI o NO	Pendiente	2018-11-22	2018-11-22
414264	37225965	AM	3008029652	2018-11-22 10:43:23	2018-11-22 10:43:24	Sus cesantias en el FNA pueden ser la primera cuota de una casa para su familia. Quiere saber mas? SIN COSTO, responda SI o NO	Pendiente	2018-11-22	2018-11-22
415140	37315407	AM	3209863840	2018-11-22 10:43:23	2018-11-22 10:43:24	Sus cesantias en el FNA pueden ser la primera cuota de una casa. Quiere saber mas? SIN COSTO, responda SI o NO	Pendiente	2018-11-22	2018-11-22
418286	38253896	AM	3123368869	2018-11-22 10:43:23	2018-11-22 10:43:24	Sus cesantias en el FNA pueden ser la primera cuota de una casa. Quiere saber mas? SIN COSTO, responda SI o NO	Pendiente	2018-11-22	2018-11-22
424154	40014509	AM	3123357129	2018-11-22 10:43:23	2018-11-22 10:43:24	Sus cesantias en el FNA pueden ser la primera cuota de una casa en TUNJA. Quiere saber mas? SIN COSTO, responda SI o NO	Pendiente	2018-11-22	2018-11-22
426106	40403491	AM	3002035807	2018-11-22 10:43:23	2018-11-22 10:43:24	ALBA Sus cesantias en el FNA pueden ser la primera cuota de una casa. Hay subsidios disponibles, preguntelos. Quiere saber mas? SIN COSTO, responda SI o NO	Pendiente	2018-11-22	2018-11-22
427569	40795858	AM	3116849870	2018-11-22 10:43:23	2018-11-22 10:43:24	GLADYS Sus cesantias en el FNA pueden ser la primera cuota de una casa. Hay subsidios disponibles, preguntelos. Quiere saber mas? SIN COSTO, responda SI o NO	Pendiente	2018-11-22	2018-11-22
443295	41744046	AM	3014287642	2018-11-22 10:43:23	2018-11-22 10:43:24	MARIELA Sea propietario! Sus cesantias en el FNA pueden ser la primera cuota de una casa. Quiere saber mas? SIN COSTO, responda SI o NO	Pendiente	2018-11-22	2018-11-22
447862	43096921	AM	3105977009	2018-11-22 10:43:23	2018-11-23 23:09:52	No deje pasar el tiempo. Sus cesantias en el FNA pueden ser la primera cuota de una casa. Quiere saber mas? SIN COSTO, responda SI o NO	Pendiente	2018-11-22	2018-11-22	Muchas gracias por su respuesta. Un asesor del fondo Nacional del Ahorro se comunicara con usted.	Si
449463	45469024	AM	3016976246	2018-11-22 10:43:23	2018-11-22 10:43:24	HORTENCIA Sus cesantias en el FNA pueden ser la primera cuota de una casa. En 2018 financiamos 9669 clientes como Ud. Quiere saber mas? SIN COSTO, responda SI o NO	Pendiente	2018-11-22	2018-11-22
450351	46672520	AM	3103204540	2018-11-22 10:43:23	2018-11-22 10:43:24	Sus cesantias en el FNA pueden ser la primera cuota de una casa. Quiere saber mas? SIN COSTO, responda SI o NO	Pendiente	2018-11-22	2018-11-22
1070784	37947135	AM	3006799422	2018-11-22 10:43:23	2018-11-22 10:43:24	Sus cesantias en el FNA pueden ser la primera cuota de una casa. Hay subsidios disponibles, preguntelos. Quiere saber mas? SIN COSTO, responda SI o NO	Pendiente	2018-11-22	2018-11-22
1072439	91209370	AM	3204456726	2018-11-22 10:43:23	2018-11-22 10:43:24	NELSON No deje pasar el tiempo. Sus cesantias en el FNA pueden ser la primera cuota de una casa. Quiere saber mas? SIN COSTO, responda SI o NO	Pendiente	2018-11-22	2018-11-22
1078060	63540297	AM	3005639290	2018-11-22 10:43:23	2018-11-22 10:43:24	JENNY Sus cesantias en el FNA pueden ser la primera cuota de una casa. En 2018 financiamos 9669 clientes como Ud. Quiere saber mas? SIN COSTO, responda SI o NO	Pendiente	2018-11-22	2018-11-22
1096778	51804419	AM	3106995063	2018-11-22 10:43:23	2018-11-22 10:43:24	Sus cesantias en el FNA pueden ser la primera cuota de una casa. Quiere saber mas? SIN COSTO, responda SI o NO	Pendiente	2018-11-22	2018-11-22
1107098	37751451	AM	3133760811	2018-11-22 10:43:23	2018-11-22 10:43:24	Sus cesantias en el FNA pueden ser la primera cuota de una casa en BUCARAMANGA. Quiere saber mas? SIN COSTO, responda SI o NO	Pendiente	2018-11-22	2018-11-22
1110275	39328581	AM	3122182736	2018-11-22 10:43:23	2018-11-22 10:43:24	Sus cesantias en el FNA pueden ser la primera cuota de una casa. En 2018 financiamos 9669 clientes como Ud. Quiere saber mas? SIN COSTO, responda SI o NO	Pendiente	2018-11-22	2018-11-22
2185784	12459442	AM	3166950486	2018-11-22 10:43:23	2018-11-22 10:43:24	GERMAN Sus cesantias en el FNA pueden ser la primera cuota de una casa en BUCARAMANGA. Quiere saber mas? SIN COSTO, responda SI o NO	Pendiente	2018-11-22	2018-11-22
2195576	75070147	AM	3117246576	2018-11-22 10:43:23	2018-11-22 10:44:42	JOSE Sus cesantias en el FNA pueden ser la primera cuota de una casa. En 2018 financiamos 9669 clientes como Ud. Quiere saber mas? SIN COSTO, responda SI o NO	SI	2018-11-22	2018-11-22	Muchas gracias por su respuesta. Un asesor del fondo Nacional del Ahorro se comunicara con usted.
2211962	40042513	AM	3108822525	2018-11-22 10:43:23	2018-11-22 10:43:24	SONIA Sus cesantias en el FNA pueden ser la primera cuota de una casa para su familia. Quiere saber mas? SIN COSTO, responda SI o NO	Pendiente	2018-11-22	2018-11-22
2212678	32882661	AM	3014483190	2018-11-22 10:43:23	2018-11-22 10:43:24	NANCY Sus cesantias en el FNA pueden ser la primera cuota de una casa en BARRANQUILLA. Quiere saber mas? SIN COSTO, responda SI o NO	Pendiente	2018-11-22	2018-11-22
2214690	72347892	AM	3014482092	2018-11-22 10:43:23	2018-11-22 10:43:24	JORGE Sus cesantias en el FNA pueden ser la primera cuota de una casa en MEDELLIN. Quiere saber mas? SIN COSTO, responda SI o NO	Pendiente	2018-11-22	2018-11-22
2224677	63455420	AM	3156657691	2018-11-22 10:43:23	2018-11-22 10:43:24	No deje pasar el tiempo. Sus cesantias en el FNA pueden ser la primera cuota de una casa. Quiere saber mas? SIN COSTO, responda SI o NO	Pendiente	2018-11-22	2018-11-22
2227451	88220517	AM	3124106268	2018-11-22 10:43:23	2018-11-22 10:43:24	ROMULO Sus cesantias en el FNA pueden ser la primera cuota de una casa. Hay subsidios disponibles, preguntelos. Quiere saber mas? SIN COSTO, responda SI o NO	Pendiente	2018-11-22	2018-11-22
2228250	79556447	AM	3125910786	2018-11-22 10:43:23	2018-11-22 10:43:24	Sus cesantias en el FNA pueden ser la primera cuota de una casa. Quiere saber mas? SIN COSTO, responda SI o NO	Pendiente	2018-11-22	2018-11-22
2236122	16770049	AM	3103866056	2018-11-22 10:43:23	2018-11-22 10:43:24	JHON Sea propietario! Sus cesantias en el FNA pueden ser la primera cuota de una casa. Quiere saber mas? SIN COSTO, responda SI o NO	Pendiente	2018-11-22	2018-11-22
2240118	91297982	AM	3157181669	2018-11-22 10:43:23	2018-11-22 10:43:24	VICTOR Sea propietario! Sus cesantias en el FNA pueden ser la primera cuota de una casa. Quiere saber mas? SIN COSTO, responda SI o NO	Pendiente	2018-11-22	2018-11-22
2242908	50929353	AM	3215438567	2018-11-22 10:43:23	2018-11-22 10:43:24	Sea propietario! Sus cesantias en el FNA pueden ser la primera cuota de una casa. Quiere saber mas? SIN COSTO, responda SI o NO	Pendiente	2018-11-22	2018-11-22
2243117	46363104	AM	3002181285	2018-11-22 10:43:23	2018-11-22 10:43:24	CARMEN Sus cesantias en el FNA pueden ser la primera cuota de una casa. Hay subsidios disponibles, preguntelos. Quiere saber mas? SIN COSTO, responda SI o NO	Pendiente	2018-11-22	2018-11-22
2257753	93443425	AM	3143758029	2018-11-22 10:43:23	2018-11-22 10:43:24	Sus cesantias en el FNA pueden ser la primera cuota de una casa. En 2018 financiamos 9669 clientes como Ud. Quiere saber mas? SIN COSTO, responda SI o NO	Pendiente	2018-11-22	2018-11-22
2864103	45499896	AM	3005263542	2018-11-22 10:43:23	2018-11-22 10:43:24	Sus cesantias en el FNA pueden ser la primera cuota de una casa. Hay subsidios disponibles, preguntelos. Quiere saber mas? SIN COSTO, responda SI o NO	Pendiente	2018-11-22	2018-11-22
2868464	87492013	AM	3128733752	2018-11-22 10:43:23	2018-11-22 10:43:24	Sea propietario! Sus cesantias en el FNA pueden ser la primera cuota de una casa. Quiere saber mas? SIN COSTO, responda SI o NO	Pendiente	2018-11-22	2018-11-22
2875412	7724782	AM	3046615309	2018-11-22 10:43:23	2018-11-22 10:43:24	JEISON Sus cesantias en el FNA pueden ser la primera cuota de una casa en NEIVA. Quiere saber mas? SIN COSTO, responda SI o NO	Pendiente	2018-11-22	2018-11-22
2877597	43986568	AM	3102189906	2018-11-22 10:43:23	2018-11-22 10:43:24	No deje pasar el tiempo. Sus cesantias en el FNA pueden ser la primera cuota de una casa. Quiere saber mas? SIN COSTO, responda SI o NO	Pendiente	2018-11-22	2018-11-22
2882535	51940481	AM	3013435004	2018-11-22 10:43:23	2018-11-22 10:43:24	Sus cesantias en el FNA pueden ser la primera cuota de una casa en VALLEDUPAR. Quiere saber mas? SIN COSTO, responda SI o NO	Pendiente	2018-11-22	2018-11-22
2892898	25289350	AM	3008035568	2018-11-22 10:43:23	2018-11-22 10:44:06	PAOLA No deje pasar el tiempo. Sus cesantias en el FNA pueden ser la primera cuota de una casa. Quiere saber mas? SIN COSTO, responda SI o NO	SI	2018-11-22	2018-11-22	Muchas gracias por su respuesta. Un asesor del fondo Nacional del Ahorro se comunicara con usted.
2893320	1107059458	AM	3147112319	2018-11-22 10:43:23	2018-11-22 10:43:24	Sus cesantias en el FNA pueden ser la primera cuota de una casa para su familia. Quiere saber mas? SIN COSTO, responda SI o NO	Pendiente	2018-11-22	2018-11-22
2897082	1098622148	AM	3108243270	2018-11-22 10:43:23	2018-11-22 10:43:24	Sus cesantias en el FNA pueden ser la primera cuota de una casa. Quiere saber mas? SIN COSTO, responda SI o NO	Pendiente	2018-11-22	2018-11-22
2902787	94071644	AM	3122978339	2018-11-22 10:43:23	2018-11-22 11:42:45	DIEGO Sus cesantias en el FNA pueden ser la primera cuota de una casa. Hay subsidios disponibles, preguntelos. Quiere saber mas? SIN COSTO, responda SI o NO	SI	2018-11-22	2018-11-22	Muchas gracias por su respuesta. Un asesor del fondo Nacional del Ahorro se comunicara con usted.
2917924	1110453265	AM	3136284375	2018-11-22 10:43:23	2018-11-22 10:43:24	EDITH Sus cesantias en el FNA pueden ser la primera cuota de una casa para su familia. Quiere saber mas? SIN COSTO, responda SI o NO	Pendiente	2018-11-22	2018-11-22
2920335	94428727	AM	3164285085	2018-11-22 10:43:23	2018-11-22 10:43:24	FRANQUIN Sus cesantias en el FNA pueden ser la primera cuota de una casa para su familia. Quiere saber mas? SIN COSTO, responda SI o NO	Pendiente	2018-11-22	2018-11-22
2921590	25284773	AM	3183767414	2018-11-22 10:43:23	2018-11-22 10:43:24	No deje pasar el tiempo. Sus cesantias en el FNA pueden ser la primera cuota de una casa. Quiere saber mas? SIN COSTO, responda SI o NO	Pendiente	2018-11-22	2018-11-22
2924891	38640213	AM	3136616396	2018-11-22 10:43:23	2018-11-22 10:43:24	DIANA No deje pasar el tiempo. Sus cesantias en el FNA pueden ser la primera cuota de una casa. Quiere saber mas? SIN COSTO, responda SI o NO	Pendiente	2018-11-22	2018-11-22
2929872	71210601	AM	3003156470	2018-11-22 10:43:23	2018-11-22 11:10:01	Sus cesantias en el FNA pueden ser la primera cuota de una casa en MEDELLIN. Quiere saber mas? SIN COSTO, responda SI o NO	SI	2018-11-22	2018-11-22	Muchas gracias por su respuesta. Un asesor del fondo Nacional del Ahorro se comunicara con usted.
2938040	94397935	AM	3159260032	2018-11-22 10:43:23	2018-11-22 10:57:41	WILTON Sus cesantias en el FNA pueden ser la primera cuota de una casa. En 2018 financiamos 9669 clientes como Ud. Quiere saber mas? SIN COSTO, responda SI o NO	SI	2018-11-22	2018-11-22	Muchas gracias por su respuesta. Un asesor del fondo Nacional del Ahorro se comunicara con usted.
2941318	52703976	AM	3103757967	2018-11-22 10:43:23	2018-11-22 12:30:59	YAZMIN Sus cesantias en el FNA pueden ser la primera cuota de una casa en POPAYAN. Quiere saber mas? SIN COSTO, responda SI o NO	SI	2018-11-22	2018-11-22	Muchas gracias por su respuesta. Un asesor del fondo Nacional del Ahorro se comunicara con usted.
2944077	10183952	AM	3008664905	2018-11-22 10:43:23	2018-11-22 10:43:24	Sus cesantias en el FNA pueden ser la primera cuota de una casa. Hay subsidios disponibles, preguntelos. Quiere saber mas? SIN COSTO, responda SI o NO	Pendiente	2018-11-22	2018-11-22
6029182	9093728	AM	3507938407	2018-11-22 10:43:23	2018-11-22 10:43:24	VICTOR Sus cesantias en el FNA pueden ser la primera cuota de una casa. En 2018 financiamos 9669 clientes como Ud. Quiere saber mas? SIN COSTO, responda SI o NO	Pendiente	2018-11-22	2018-11-22
6042109	10139797	AM	3117523574	2018-11-22 10:43:23	2018-11-22 10:43:24	Sus cesantias en el FNA pueden ser la primera cuota de una casa para su familia. Quiere saber mas? SIN COSTO, responda SI o NO	Pendiente	2018-11-22	2018-11-22
6044099	71626609	AM	3006745607	2018-11-22 10:43:23	2018-11-22 10:43:24	Sus cesantias en el FNA pueden ser la primera cuota de una casa en MEDELLIN. Quiere saber mas? SIN COSTO, responda SI o NO	Pendiente	2018-11-22	2018-11-22
6050404	1037570516	AM	3177305375	2018-11-22 10:43:23	2018-11-22 10:43:24	Sea propietario! Sus cesantias en el FNA pueden ser la primera cuota de una casa. Quiere saber mas? SIN COSTO, responda SI o NO	Pendiente	2018-11-22	2018-11-22
6053056	71641971	AM	3213614833	2018-11-22 10:43:23	2018-11-22 10:43:24	Sea propietario! Sus cesantias en el FNA pueden ser la primera cuota de una casa. Quiere saber mas? SIN COSTO, responda SI o NO	Pendiente	2018-11-22	2018-11-22
6060817	24627717	AM	3116270281	2018-11-22 10:43:23	2018-11-22 10:43:24	ELEONORA Sus cesantias en el FNA pueden ser la primera cuota de una casa. Hay subsidios disponibles, preguntelos. Quiere saber mas? SIN COSTO, responda SI o NO	Pendiente	2018-11-22	2018-11-22
6062320	52818392	AM	3124781127	2018-11-22 10:43:23	2018-11-22 10:43:24	PAULA No deje pasar el tiempo. Sus cesantias en el FNA pueden ser la primera cuota de una casa. Quiere saber mas? SIN COSTO, responda SI o NO	Pendiente	2018-11-22	2018-11-22
6066311	16843614	AM	3217251613	2018-11-22 10:43:23	2018-11-22 10:43:24	ELIBARDO Sus cesantias en el FNA pueden ser la primera cuota de una casa para su familia. Quiere saber mas? SIN COSTO, responda SI o NO	Pendiente	2018-11-22	2018-11-22
6070169	16777805	AM	3113566391	2018-11-22 10:43:23	2018-11-22 10:43:24	Sea propietario! Sus cesantias en el FNA pueden ser la primera cuota de una casa. Quiere saber mas? SIN COSTO, responda SI o NO	Pendiente	2018-11-22	2018-11-22
6072004	94369638	AM	3154379356	2018-11-22 10:43:23	2018-11-22 10:43:24	Sus cesantias en el FNA pueden ser la primera cuota de una casa. En 2018 financiamos 9669 clientes como Ud. Quiere saber mas? SIN COSTO, responda SI o NO	Pendiente	2018-11-22	2018-11-22
6086709	85459566	AM	3014795737	2018-11-22 10:43:23	2018-11-22 10:43:24	Sus cesantias en el FNA pueden ser la primera cuota de una casa en SANTA MARTA. Quiere saber mas? SIN COSTO, responda SI o NO	Pendiente	2018-11-22	2018-11-22
6090734	59816332	AM	3105354175	2018-11-22 10:43:23	2018-11-22 10:43:24	Sus cesantias en el FNA pueden ser la primera cuota de una casa. Hay subsidios disponibles, preguntelos. Quiere saber mas? SIN COSTO, responda SI o NO	Pendiente	2018-11-22	2018-11-22
6103522	1053781926	AM	3103900314	2018-11-22 10:43:23	2018-11-22 10:43:24	Sus cesantias en el FNA pueden ser la primera cuota de una casa para su familia. Quiere saber mas? SIN COSTO, responda SI o NO	Pendiente	2018-11-22	2018-11-22
6108023	71608065	AM	3128866668	2018-11-22 10:43:23	2018-11-22 10:43:24	RAUL Sea propietario! Sus cesantias en el FNA pueden ser la primera cuota de una casa. Quiere saber mas? SIN COSTO, responda SI o NO	Pendiente	2018-11-22	2018-11-22
7350565	91177706	AM	3168439786	2018-11-22 10:43:23	2018-11-22 10:43:24	ELGAR Sea propietario! Sus cesantias en el FNA pueden ser la primera cuota de una casa. Quiere saber mas? SIN COSTO, responda SI o NO	Pendiente	2018-11-22	2018-11-22
7363040	70417970	AM	3105177331	2018-11-22 10:43:23	2018-11-22 11:02:38	Sus cesantias en el FNA pueden ser la primera cuota de una casa en MEDELLIN. Quiere saber mas? SIN COSTO, responda SI o NO	SI	2018-11-22	2018-11-22	Muchas gracias por su respuesta. Un asesor del fondo Nacional del Ahorro se comunicara con usted.
7378444	8026696	AM	3106360180	2018-11-22 10:43:23	2018-11-22 10:43:24	Sea propietario! Sus cesantias en el FNA pueden ser la primera cuota de una casa. Quiere saber mas? SIN COSTO, responda SI o NO	Pendiente	2018-11-22	2018-11-22
7388031	71740390	AM	3105483478	2018-11-22 10:43:23	2018-11-22 10:43:24	Sus cesantias en el FNA pueden ser la primera cuota de una casa. En 2018 financiamos 9669 clientes como Ud. Quiere saber mas? SIN COSTO, responda SI o NO	Pendiente	2018-11-22	2018-11-22
7413457	94510047	AM	3163730237	2018-11-22 10:43:23	2018-11-22 10:43:24	Sea propietario! Sus cesantias en el FNA pueden ser la primera cuota de una casa. Quiere saber mas? SIN COSTO, responda SI o NO	Pendiente	2018-11-22	2018-11-22
7418926	31945393	AM	3137756594	2018-11-22 10:43:23	2018-11-22 10:43:24	Sus cesantias en el FNA pueden ser la primera cuota de una casa. En 2018 financiamos 9669 clientes como Ud. Quiere saber mas? SIN COSTO, responda SI o NO	Pendiente	2018-11-22	2018-11-22
7429873	71659972	AM	3165262162	2018-11-22 10:43:23	2018-11-22 13:02:06	Sea propietario! Sus cesantias en el FNA pueden ser la primera cuota de una casa. Quiere saber mas? SIN COSTO, responda SI o NO	SI	2018-11-22	2018-11-22	Muchas gracias por su respuesta. Un asesor del fondo Nacional del Ahorro se comunicara con usted.
7465926	98627910	AM	3114560899	2018-11-22 10:43:23	2018-11-22 10:43:24	WALTER Sus cesantias en el FNA pueden ser la primera cuota de una casa para su familia. Quiere saber mas? SIN COSTO, responda SI o NO	Pendiente	2018-11-22	2018-11-22
729681	23552860	AM	3103417622	2018-11-22 10:43:23	2018-11-22 10:43:24	DIOMAR Sus cesantias en el FNA pueden ser la primera cuota de una casa. Hay subsidios disponibles, preguntelos. Quiere saber mas? SIN COSTO, responda SI o NO	Pendiente	2018-11-22	2018-11-22
731736	98577587	AM	3164241983	2018-11-22 10:43:23	2018-11-22 10:43:24	Sus cesantias en el FNA pueden ser la primera cuota de una casa en MEDELLIN. Quiere saber mas? SIN COSTO, responda SI o NO	Pendiente	2018-11-22	2018-11-22
736367	59176399	AM	3012970558	2018-11-22 10:43:23	2018-11-22 10:43:24	GLADIS No deje pasar el tiempo. Sus cesantias en el FNA pueden ser la primera cuota de una casa. Quiere saber mas? SIN COSTO, responda SI o NO	Pendiente	2018-11-22	2018-11-22
737093	13501382	AM	3114783091	2018-11-22 10:43:23	2018-11-22 10:43:24	JOSE Sus cesantias en el FNA pueden ser la primera cuota de una casa. En 2018 financiamos 9669 clientes como Ud. Quiere saber mas? SIN COSTO, responda SI o NO	Pendiente	2018-11-22	2018-11-22
737768	8406246	AM	3206740023	2018-11-22 10:43:23	2018-11-22 10:43:24	Sus cesantias en el FNA pueden ser la primera cuota de una casa en MEDELLIN. Quiere saber mas? SIN COSTO, responda SI o NO	Pendiente	2018-11-22	2018-11-22
738456	13470297	AM	3162225097	2018-11-22 10:43:23	2018-11-22 10:43:24	Sus cesantias en el FNA pueden ser la primera cuota de una casa. Hay subsidios disponibles, preguntelos. Quiere saber mas? SIN COSTO, responda SI o NO	Pendiente	2018-11-22	2018-11-22
738999	88228029	AM	3204507760	2018-11-22 10:43:23	2018-11-22 10:43:24	No deje pasar el tiempo. Sus cesantias en el FNA pueden ser la primera cuota de una casa. Quiere saber mas? SIN COSTO, responda SI o NO	Pendiente	2018-11-22	2018-11-22
740078	80169387	AM	3102357840	2018-11-22 10:43:23	2018-11-22 10:43:24	Sea propietario! Sus cesantias en el FNA pueden ser la primera cuota de una casa. Quiere saber mas? SIN COSTO, responda SI o NO	Pendiente	2018-11-22	2018-11-22
740196	88254785	AM	3154772936	2018-11-22 10:43:23	2018-11-22 10:43:24	Sus cesantias en el FNA pueden ser la primera cuota de una casa. En 2018 financiamos 9669 clientes como Ud. Quiere saber mas? SIN COSTO, responda SI o NO	Pendiente	2018-11-22	2018-11-22
742008	26428309	AM	3163990991	2018-11-22 10:43:23	2018-11-22 10:43:24	ANDREA Sus cesantias en el FNA pueden ser la primera cuota de una casa en NEIVA. Quiere saber mas? SIN COSTO, responda SI o NO	Pendiente	2018-11-22	2018-11-22
742100	42684434	AM	3205896645	2018-11-22 10:43:23	2018-11-22 10:43:24	NELLY Sus cesantias en el FNA pueden ser la primera cuota de una casa para su familia. Quiere saber mas? SIN COSTO, responda SI o NO	Pendiente	2018-11-22	2018-11-22
742128	73164504	AM	3114101267	2018-11-22 10:43:23	2018-11-22 10:47:05	NELSON Sus cesantias en el FNA pueden ser la primera cuota de una casa. Hay subsidios disponibles, preguntelos. Quiere saber mas? SIN COSTO, responda SI o NO	SI	2018-11-22	2018-11-22	Muchas gracias por su respuesta. Un asesor del fondo Nacional del Ahorro se comunicara con usted.
743105	30236831	AM	3205027255	2018-11-22 10:43:23	2018-11-22 10:43:24	Sus cesantias en el FNA pueden ser la primera cuota de una casa. En 2018 financiamos 9669 clientes como Ud. Quiere saber mas? SIN COSTO, responda SI o NO	Pendiente	2018-11-22	2018-11-22
743254	40048397	AM	3208093126	2018-11-22 10:43:23	2018-11-22 10:43:24	Sus cesantias en el FNA pueden ser la primera cuota de una casa para su familia. Quiere saber mas? SIN COSTO, responda SI o NO	Pendiente	2018-11-22	2018-11-22
743856	24323070	AM	3005699779	2018-11-22 10:43:23	2018-11-22 10:43:24	No deje pasar el tiempo. Sus cesantias en el FNA pueden ser la primera cuota de una casa. Quiere saber mas? SIN COSTO, responda SI o NO	Pendiente	2018-11-22	2018-11-22
745369	78750771	AM	3215392195	2018-11-22 10:43:23	2018-11-22 10:43:24	No deje pasar el tiempo. Sus cesantias en el FNA pueden ser la primera cuota de una casa. Quiere saber mas? SIN COSTO, responda SI o NO	Pendiente	2018-11-22	2018-11-22
746590	27250005	AM	3007745358	2018-11-22 10:43:23	2018-11-22 10:43:24	Sus cesantias en el FNA pueden ser la primera cuota de una casa para su familia. Quiere saber mas? SIN COSTO, responda SI o NO	Pendiente	2018-11-22	2018-11-22
746871	9091842	AM	3215460697	2018-11-22 10:43:23	2018-11-22 13:30:45	Sus cesantias en el FNA pueden ser la primera cuota de una casa. Hay subsidios disponibles, preguntelos. Quiere saber mas? SIN COSTO, responda SI o NO	SI	2018-11-22	2018-11-22	Muchas gracias por su respuesta. Un asesor del fondo Nacional del Ahorro se comunicara con usted.
748354	32329	AM	3123788690	2018-11-22 10:43:23	2018-11-22 10:43:24	Sus cesantias en el FNA pueden ser la primera cuota de una casa en CUCUTA. Quiere saber mas? SIN COSTO, responda SI o NO	Pendiente	2018-11-22	2018-11-22
749156	80281640	AM	3112732667	2018-11-22 10:43:23	2018-11-22 10:43:24	Sus cesantias en el FNA pueden ser la primera cuota de una casa para su familia. Quiere saber mas? SIN COSTO, responda SI o NO	Pendiente	2018-11-22	2018-11-22
749327	63563186	AM	3156161335	2018-11-22 10:43:23	2018-11-22 10:43:24	No deje pasar el tiempo. Sus cesantias en el FNA pueden ser la primera cuota de una casa. Quiere saber mas? SIN COSTO, responda SI o NO	Pendiente	2018-11-22	2018-11-22
751048	43730167	AM	3146155707	2018-11-22 10:43:23	2018-11-22 10:43:24	SANDRA Sus cesantias en el FNA pueden ser la primera cuota de una casa. En 2018 financiamos 9669 clientes como Ud. Quiere saber mas? SIN COSTO, responda SI o NO	Pendiente	2018-11-22	2018-11-22
751265	76309414	AM	3004866370	2018-11-22 10:43:23	2018-11-22 10:43:24	Sus cesantias en el FNA pueden ser la primera cuota de una casa para su familia. Quiere saber mas? SIN COSTO, responda SI o NO	Pendiente	2018-11-22	2018-11-22
752927	9172847	AM	3145835197	2018-11-22 10:43:23	2018-11-22 10:43:24	Sea propietario! Sus cesantias en el FNA pueden ser la primera cuota de una casa. Quiere saber mas? SIN COSTO, responda SI o NO	Pendiente	2018-11-22	2018-11-22
753283	19409755	AM	3162672625	2018-11-22 10:43:23	2018-11-22 10:43:24	Sus cesantias en el FNA pueden ser la primera cuota de una casa. Hay subsidios disponibles, preguntelos. Quiere saber mas? SIN COSTO, responda SI o NO	Pendiente	2018-11-22	2018-11-22
754786	37893800	AM	3124966556	2018-11-22 10:43:23	2018-11-22 10:43:24	No deje pasar el tiempo. Sus cesantias en el FNA pueden ser la primera cuota de una casa. Quiere saber mas? SIN COSTO, responda SI o NO	Pendiente	2018-11-22	2018-11-22
755823	65773035	AM	3178362225	2018-11-22 10:43:23	2018-11-22 10:43:24	No deje pasar el tiempo. Sus cesantias en el FNA pueden ser la primera cuota de una casa. Quiere saber mas? SIN COSTO, responda SI o NO	Pendiente	2018-11-22	2018-11-22
758859	10252706	AM	3128039590	2018-11-22 10:43:23	2018-11-22 10:43:24	VIRGILIO Sus cesantias en el FNA pueden ser la primera cuota de una casa. Hay subsidios disponibles, preguntelos. Quiere saber mas? SIN COSTO, responda SI o NO	Pendiente	2018-11-22	2018-11-22
759121	36588987	AM	3157542085	2018-11-22 10:43:23	2018-11-22 10:43:24	Sus cesantias en el FNA pueden ser la primera cuota de una casa en VALLEDUPAR. Quiere saber mas? SIN COSTO, responda SI o NO	Pendiente	2018-11-22	2018-11-22
760136	74374861	AM	3213463000	2018-11-22 10:43:23	2018-11-22 10:43:24	Sus cesantias en el FNA pueden ser la primera cuota de una casa en DUITAMA. Quiere saber mas? SIN COSTO, responda SI o NO	Pendiente	2018-11-22	2018-11-22
762293	39682345	AM	3108657705	2018-11-22 10:43:23	2018-11-22 10:43:24	Sus cesantias en el FNA pueden ser la primera cuota de una casa en TUNJA. Quiere saber mas? SIN COSTO, responda SI o NO	Pendiente	2018-11-22	2018-11-22
767365	92513396	AM	3107471084	2018-11-22 10:43:23	2018-11-22 10:43:24	ANGEL No deje pasar el tiempo. Sus cesantias en el FNA pueden ser la primera cuota de una casa. Quiere saber mas? SIN COSTO, responda SI o NO	Pendiente	2018-11-22	2018-11-22
768939	30328999	AM	3218510904	2018-11-22 10:43:23	2018-11-22 10:43:24	Sus cesantias en el FNA pueden ser la primera cuota de una casa. Quiere saber mas? SIN COSTO, responda SI o NO	Pendiente	2018-11-22	2018-11-22
769540	4897195	AM	3143592725	2018-11-22 10:43:23	2018-11-22 10:43:24	CARLOS Sus cesantias en el FNA pueden ser la primera cuota de una casa en TUNJA. Quiere saber mas? SIN COSTO, responda SI o NO	Pendiente	2018-11-22	2018-11-22
771424	12138277	AM	3124827305	2018-11-22 10:43:23	2018-11-22 10:43:24	JAIME Sus cesantias en el FNA pueden ser la primera cuota de una casa. Hay subsidios disponibles, preguntelos. Quiere saber mas? SIN COSTO, responda SI o NO	Pendiente	2018-11-22	2018-11-22
771780	30744183	AM	3128956602	2018-11-22 10:43:23	2018-11-22 10:43:24	SARA Sus cesantias en el FNA pueden ser la primera cuota de una casa para su familia. Quiere saber mas? SIN COSTO, responda SI o NO	Pendiente	2018-11-22	2018-11-22
772265	10278606	AM	3147153524	2018-11-22 10:43:23	2018-11-22 10:43:24	Sus cesantias en el FNA pueden ser la primera cuota de una casa para su familia. Quiere saber mas? SIN COSTO, responda SI o NO	Pendiente	2018-11-22	2018-11-22
772444	74357770	AM	3114442997	2018-11-22 10:43:23	2018-11-22 10:43:24	LUIS Sus cesantias en el FNA pueden ser la primera cuota de una casa para su familia. Quiere saber mas? SIN COSTO, responda SI o NO	Pendiente	2018-11-22	2018-11-22
773989	34553762	AM	3156719308	2018-11-22 10:43:23	2018-11-22 10:43:24	MARGARITA Sea propietario! Sus cesantias en el FNA pueden ser la primera cuota de una casa. Quiere saber mas? SIN COSTO, responda SI o NO	Pendiente	2018-11-22	2018-11-22
774866	4272278	AM	3204001501	2018-11-22 10:43:23	2018-11-22 10:43:24	Sus cesantias en el FNA pueden ser la primera cuota de una casa. En 2018 financiamos 9669 clientes como Ud. Quiere saber mas? SIN COSTO, responda SI o NO	Pendiente	2018-11-22	2018-11-22
775334	73104429	AM	3158824667	2018-11-22 10:43:23	2018-11-22 10:43:24	FREDY Sus cesantias en el FNA pueden ser la primera cuota de una casa en CARTAGENA. Quiere saber mas? SIN COSTO, responda SI o NO	Pendiente	2018-11-22	2018-11-22
777194	48600759	AM	3218601119	2018-11-22 10:43:23	2018-11-22 10:43:24	MARIA Sus cesantias en el FNA pueden ser la primera cuota de una casa. En 2018 financiamos 9669 clientes como Ud. Quiere saber mas? SIN COSTO, responda SI o NO	Pendiente	2018-11-22	2018-11-22
777654	49653840	AM	3158405165	2018-11-22 10:43:23	2018-11-22 10:43:24	ZAINE Sus cesantias en el FNA pueden ser la primera cuota de una casa. Hay subsidios disponibles, preguntelos. Quiere saber mas? SIN COSTO, responda SI o NO	Pendiente	2018-11-22	2018-11-22
779007	57299521	AM	3103543766	2018-11-22 10:43:23	2018-11-22 10:43:24	TINA Sus cesantias en el FNA pueden ser la primera cuota de una casa en SANTA MARTA. Quiere saber mas? SIN COSTO, responda SI o NO	Pendiente	2018-11-22	2018-11-22
1336947	46668791	AM	3108025879	2018-11-22 10:43:23	2018-11-22 10:43:24	ELSA Sus cesantias en el FNA pueden ser la primera cuota de una casa en DUITAMA. Quiere saber mas? SIN COSTO, responda SI o NO	Pendiente	2018-11-22	2018-11-22
1354102	63488412	AM	3134694486	2018-11-22 10:43:23	2018-11-22 10:43:24	Sus cesantias en el FNA pueden ser la primera cuota de una casa. En 2018 financiamos 9669 clientes como Ud. Quiere saber mas? SIN COSTO, responda SI o NO	Pendiente	2018-11-22	2018-11-22
1358791	13361878	AM	3124111862	2018-11-22 10:43:23	2018-11-22 10:43:24	Sea propietario! Sus cesantias en el FNA pueden ser la primera cuota de una casa. Quiere saber mas? SIN COSTO, responda SI o NO	Pendiente	2018-11-22	2018-11-22
1369576	91248760	AM	3008436059	2018-11-22 10:43:23	2018-11-22 10:43:24	SAMUEL Sus cesantias en el FNA pueden ser la primera cuota de una casa. Hay subsidios disponibles, preguntelos. Quiere saber mas? SIN COSTO, responda SI o NO	Pendiente	2018-11-22	2018-11-22
1369808	72218764	AM	3135042728	2018-11-22 10:43:23	2018-11-22 12:45:07	DANIEL Sea propietario! Sus cesantias en el FNA pueden ser la primera cuota de una casa. Quiere saber mas? SIN COSTO, responda SI o NO	SI	2018-11-22	2018-11-22	Muchas gracias por su respuesta. Un asesor del fondo Nacional del Ahorro se comunicara con usted.
1376253	43088108	AM	3137655732	2018-11-22 10:43:23	2018-11-22 10:43:24	Sus cesantias en el FNA pueden ser la primera cuota de una casa para su familia. Quiere saber mas? SIN COSTO, responda SI o NO	Pendiente	2018-11-22	2018-11-22
1378229	43159627	AM	3154096628	2018-11-22 10:43:23	2018-11-22 10:43:24	YEIMI Sus cesantias en el FNA pueden ser la primera cuota de una casa. En 2018 financiamos 9669 clientes como Ud. Quiere saber mas? SIN COSTO, responda SI o NO	Pendiente	2018-11-22	2018-11-22
1392803	40041704	AM	3132380265	2018-11-22 10:43:23	2018-11-22 10:43:24	ADRIANA Sus cesantias en el FNA pueden ser la primera cuota de una casa. Hay subsidios disponibles, preguntelos. Quiere saber mas? SIN COSTO, responda SI o NO	Pendiente	2018-11-22	2018-11-22
1398713	98391792	AM	3163187436	2018-11-22 10:43:23	2018-11-22 10:43:24	Sus cesantias en el FNA pueden ser la primera cuota de una casa. Hay subsidios disponibles, preguntelos. Quiere saber mas? SIN COSTO, responda SI o NO	Pendiente	2018-11-22	2018-11-22
2455437	45436967	AM	3003046671	2018-11-22 10:43:23	2018-11-22 10:43:24	Sus cesantias en el FNA pueden ser la primera cuota de una casa en BARRANQUILLA. Quiere saber mas? SIN COSTO, responda SI o NO	Pendiente	2018-11-22	2018-11-22
2466765	91285929	AM	3188007652	2018-11-22 10:43:23	2018-11-22 10:43:24	Sus cesantias en el FNA pueden ser la primera cuota de una casa. Hay subsidios disponibles, preguntelos. Quiere saber mas? SIN COSTO, responda SI o NO	Pendiente	2018-11-22	2018-11-22
2478485	55167705	AM	3002096718	2018-11-22 10:43:23	2018-11-22 10:43:24	MONICA Sus cesantias en el FNA pueden ser la primera cuota de una casa. En 2018 financiamos 9669 clientes como Ud. Quiere saber mas? SIN COSTO, responda SI o NO	Pendiente	2018-11-22	2018-11-22
2487212	13541189	AM	3177888639	2018-11-22 10:43:23	2018-11-22 10:43:24	Sus cesantias en el FNA pueden ser la primera cuota de una casa en BUCARAMANGA. Quiere saber mas? SIN COSTO, responda SI o NO	Pendiente	2018-11-22	2018-11-22
2491722	13276041	AM	3125017851	2018-11-22 10:43:23	2018-11-22 10:43:24	JAVIER No deje pasar el tiempo. Sus cesantias en el FNA pueden ser la primera cuota de una casa. Quiere saber mas? SIN COSTO, responda SI o NO	Pendiente	2018-11-22	2018-11-22
2500381	24327952	AM	3007902716	2018-11-22 10:43:23	2018-11-22 10:43:24	GRECIA Sus cesantias en el FNA pueden ser la primera cuota de una casa. En 2018 financiamos 9669 clientes como Ud. Quiere saber mas? SIN COSTO, responda SI o NO	Pendiente	2018-11-22	2018-11-22
2502242	74370608	AM	3158943989	2018-11-22 10:43:23	2018-11-22 10:43:24	JOSE No deje pasar el tiempo. Sus cesantias en el FNA pueden ser la primera cuota de una casa. Quiere saber mas? SIN COSTO, responda SI o NO	Pendiente	2018-11-22	2018-11-22
2505535	75084868	AM	3117262225	2018-11-22 10:43:23	2018-11-22 10:43:24	Sus cesantias en el FNA pueden ser la primera cuota de una casa en MANIZALES. Quiere saber mas? SIN COSTO, responda SI o NO	Pendiente	2018-11-22	2018-11-22
2515275	60377028	AM	3112402163	2018-11-22 10:43:23	2018-11-22 10:43:24	CLARA Sea propietario! Sus cesantias en el FNA pueden ser la primera cuota de una casa. Quiere saber mas? SIN COSTO, responda SI o NO	Pendiente	2018-11-22	2018-11-22
2520212	24348751	AM	3146464661	2018-11-22 10:43:23	2018-11-22 10:43:24	MARIA Sus cesantias en el FNA pueden ser la primera cuota de una casa para su familia. Quiere saber mas? SIN COSTO, responda SI o NO	Pendiente	2018-11-22	2018-11-22
2527674	51829440	AM	3115569653	2018-11-22 10:43:23	2018-11-22 10:43:24	Sus cesantias en el FNA pueden ser la primera cuota de una casa. Quiere saber mas? SIN COSTO, responda SI o NO	Pendiente	2018-11-22	2018-11-22
2532156	79789749	AM	3102378904	2018-11-22 10:43:23	2018-11-22 10:43:24	Sus cesantias en el FNA pueden ser la primera cuota de una casa para su familia. Quiere saber mas? SIN COSTO, responda SI o NO	Pendiente	2018-11-22	2018-11-22
2534990	37618006	AM	3202507786	2018-11-22 10:43:23	2018-11-22 10:43:24	Sus cesantias en el FNA pueden ser la primera cuota de una casa en BUCARAMANGA. Quiere saber mas? SIN COSTO, responda SI o NO	Pendiente	2018-11-22	2018-11-22
2546323	35195239	AM	3125431533	2018-11-22 10:43:23	2018-11-22 10:43:24	NATALIA Sus cesantias en el FNA pueden ser la primera cuota de una casa. Hay subsidios disponibles, preguntelos. Quiere saber mas? SIN COSTO, responda SI o NO	Pendiente	2018-11-22	2018-11-22
3826318	1098654107	AM	3182480479	2018-11-22 10:43:23	2018-11-22 10:43:24	Sus cesantias en el FNA pueden ser la primera cuota de una casa. Quiere saber mas? SIN COSTO, responda SI o NO	Pendiente	2018-11-22	2018-11-22
3826977	1079177150	AM	3137716395	2018-11-22 10:43:23	2018-11-22 10:43:24	ANGGIE No deje pasar el tiempo. Sus cesantias en el FNA pueden ser la primera cuota de una casa. Quiere saber mas? SIN COSTO, responda SI o NO	Pendiente	2018-11-22	2018-11-22
3827088	1059811440	AM	3207026063	2018-11-22 10:43:23	2018-11-22 10:43:24	MARCELA Sus cesantias en el FNA pueden ser la primera cuota de una casa. En 2018 financiamos 9669 clientes como Ud. Quiere saber mas? SIN COSTO, responda SI o NO	Pendiente	2018-11-22	2018-11-22
3828691	37122502	AM	3113274426	2018-11-22 10:43:23	2018-11-22 10:43:24	SOFIA Sea propietario! Sus cesantias en el FNA pueden ser la primera cuota de una casa. Quiere saber mas? SIN COSTO, responda SI o NO	Pendiente	2018-11-22	2018-11-22
3837184	1122127121	AM	3102893088	2018-11-22 10:43:23	2018-11-22 15:35:31	Sus cesantias en el FNA pueden ser la primera cuota de una casa para su familia. Quiere saber mas? SIN COSTO, responda SI o NO	SI	2018-11-22	2018-11-22	Muchas gracias por su respuesta. Un asesor del fondo Nacional del Ahorro se comunicara con usted.
3844839	1089479107	AM	3117736232	2018-11-22 10:43:23	2018-11-22 10:43:24	YULI Sus cesantias en el FNA pueden ser la primera cuota de una casa. En 2018 financiamos 9669 clientes como Ud. Quiere saber mas? SIN COSTO, responda SI o NO	Pendiente	2018-11-22	2018-11-22
3849970	29105448	AM	3128923582	2018-11-22 10:43:23	2018-11-22 10:43:24	MARYURY Sus cesantias en el FNA pueden ser la primera cuota de una casa en CALI. Quiere saber mas? SIN COSTO, responda SI o NO	Pendiente	2018-11-22	2018-11-22
3861254	40332444	AM	3114912364	2018-11-22 10:43:23	2018-11-22 10:43:24	Sus cesantias en el FNA pueden ser la primera cuota de una casa en CALI. Quiere saber mas? SIN COSTO, responda SI o NO	Pendiente	2018-11-22	2018-11-22
3861548	26512496	AM	3167473114	2018-11-22 10:43:23	2018-11-22 10:43:24	LINA Sea propietario! Sus cesantias en el FNA pueden ser la primera cuota de una casa. Quiere saber mas? SIN COSTO, responda SI o NO	Pendiente	2018-11-22	2018-11-22
3865406	13543816	AM	3103170578	2018-11-22 10:43:23	2018-11-22 10:43:24	NESTOR Sus cesantias en el FNA pueden ser la primera cuota de una casa. En 2018 financiamos 9669 clientes como Ud. Quiere saber mas? SIN COSTO, responda SI o NO	Pendiente	2018-11-22	2018-11-22
3881202	40039567	AM	3144711423	2018-11-22 10:43:23	2018-11-22 10:43:24	CLAUDIA No deje pasar el tiempo. Sus cesantias en el FNA pueden ser la primera cuota de una casa. Quiere saber mas? SIN COSTO, responda SI o NO	Pendiente	2018-11-22	2018-11-22
3896896	73236583	AM	3013445509	2018-11-22 10:43:23	2018-11-22 10:43:24	Sus cesantias en el FNA pueden ser la primera cuota de una casa. Quiere saber mas? SIN COSTO, responda SI o NO	Pendiente	2018-11-22	2018-11-22
3897907	37397244	AM	3162876947	2018-11-22 10:43:23	2018-11-22 10:43:24	No deje pasar el tiempo. Sus cesantias en el FNA pueden ser la primera cuota de una casa. Quiere saber mas? SIN COSTO, responda SI o NO	Pendiente	2018-11-22	2018-11-22
3903093	10766217	AM	3107367061	2018-11-22 10:43:23	2018-11-22 10:43:24	Sus cesantias en el FNA pueden ser la primera cuota de una casa. Hay subsidios disponibles, preguntelos. Quiere saber mas? SIN COSTO, responda SI o NO	Pendiente	2018-11-22	2018-11-22
3904074	49716889	AM	3164038129	2018-11-22 10:43:23	2018-11-22 10:43:24	CLAUDIA Sus cesantias en el FNA pueden ser la primera cuota de una casa en VALLEDUPAR. Quiere saber mas? SIN COSTO, responda SI o NO	Pendiente	2018-11-22	2018-11-22
3905125	1047382274	AM	3017439552	2018-11-22 10:43:23	2018-11-22 10:43:24	Sea propietario! Sus cesantias en el FNA pueden ser la primera cuota de una casa. Quiere saber mas? SIN COSTO, responda SI o NO	Pendiente	2018-11-22	2018-11-22
3916399	1032365426	AM	3182088698	2018-11-22 10:43:23	2018-11-22 10:43:24	LAURA No deje pasar el tiempo. Sus cesantias en el FNA pueden ser la primera cuota de una casa. Quiere saber mas? SIN COSTO, responda SI o NO	Pendiente	2018-11-22	2018-11-22
3919025	6776589	AM	3118042139	2018-11-22 10:43:23	2018-11-22 10:43:24	JAMER Sea propietario! Sus cesantias en el FNA pueden ser la primera cuota de una casa. Quiere saber mas? SIN COSTO, responda SI o NO	Pendiente	2018-11-22	2018-11-22
3928228	31642029	AM	3146308464	2018-11-22 10:43:23	2018-11-22 10:43:24	Sus cesantias en el FNA pueden ser la primera cuota de una casa para su familia. Quiere saber mas? SIN COSTO, responda SI o NO	Pendiente	2018-11-22	2018-11-22
3935243	57297929	AM	3144472482	2018-11-22 10:43:23	2018-11-22 10:43:24	MARIA Sus cesantias en el FNA pueden ser la primera cuota de una casa en SANTA MARTA. Quiere saber mas? SIN COSTO, responda SI o NO	Pendiente	2018-11-22	2018-11-22
8767864	1067843271	AM	3007040831	2018-11-22 10:43:23	2018-11-22 10:43:24	ADRIANA No deje pasar el tiempo. Sus cesantias en el FNA pueden ser la primera cuota de una casa. Quiere saber mas? SIN COSTO, responda SI o NO	Pendiente	2018-11-22	2018-11-22
8912022	34678605	AM	3137656354	2018-11-22 10:43:23	2018-11-22 10:43:24	Sea propietario! Sus cesantias en el FNA pueden ser la primera cuota de una casa. Quiere saber mas? SIN COSTO, responda SI o NO	Pendiente	2018-11-22	2018-11-22
949046	36516135	AM	3114183324	2018-11-22 10:43:23	2018-11-22 10:43:24	Sus cesantias en el FNA pueden ser la primera cuota de una casa para su familia. Quiere saber mas? SIN COSTO, responda SI o NO	Pendiente	2018-11-22	2018-11-22
950141	30738477	AM	3127772073	2018-11-22 10:43:23	2018-11-22 10:43:24	YOLVY No deje pasar el tiempo. Sus cesantias en el FNA pueden ser la primera cuota de una casa. Quiere saber mas? SIN COSTO, responda SI o NO	Pendiente	2018-11-22	2018-11-22
956794	34554158	AM	3218697245	2018-11-22 10:43:23	2018-11-22 10:43:24	MARTHA No deje pasar el tiempo. Sus cesantias en el FNA pueden ser la primera cuota de una casa. Quiere saber mas? SIN COSTO, responda SI o NO	Pendiente	2018-11-22	2018-11-22
958953	27720634	AM	3123241512	2018-11-22 10:43:23	2018-11-22 10:43:24	Sea propietario! Sus cesantias en el FNA pueden ser la primera cuota de una casa. Quiere saber mas? SIN COSTO, responda SI o NO	Pendiente	2018-11-22	2018-11-22
960162	98590690	AM	3113179979	2018-11-22 10:43:23	2018-11-22 10:43:24	IVAN Sus cesantias en el FNA pueden ser la primera cuota de una casa en MEDELLIN. Quiere saber mas? SIN COSTO, responda SI o NO	Pendiente	2018-11-22	2018-11-22
961549	33377452	AM	3144659547	2018-11-22 10:43:23	2018-11-22 10:43:24	ANGELA Sus cesantias en el FNA pueden ser la primera cuota de una casa para su familia. Quiere saber mas? SIN COSTO, responda SI o NO	Pendiente	2018-11-22	2018-11-22
968117	36534130	AM	3116730629	2018-11-22 10:43:23	2018-11-22 10:43:24	BLANCA Sea propietario! Sus cesantias en el FNA pueden ser la primera cuota de una casa. Quiere saber mas? SIN COSTO, responda SI o NO	Pendiente	2018-11-22	2018-11-22
968398	27851561	AM	3132562916	2018-11-22 10:43:23	2018-11-22 10:43:24	STELLA Sea propietario! Sus cesantias en el FNA pueden ser la primera cuota de una casa. Quiere saber mas? SIN COSTO, responda SI o NO	Pendiente	2018-11-22	2018-11-22
970642	40010745	AM	3143577224	2018-11-22 10:43:23	2018-11-22 10:43:24	No deje pasar el tiempo. Sus cesantias en el FNA pueden ser la primera cuota de una casa. Quiere saber mas? SIN COSTO, responda SI o NO	Pendiente	2018-11-22	2018-11-22
972755	12263088	AM	3183376757	2018-11-22 10:43:23	2018-11-22 10:43:24	JOSE Sea propietario! Sus cesantias en el FNA pueden ser la primera cuota de una casa. Quiere saber mas? SIN COSTO, responda SI o NO	Pendiente	2018-11-22	2018-11-22
974920	73143285	AM	3185198364	2018-11-22 10:43:23	2018-11-22 10:43:24	RAFAEL Sus cesantias en el FNA pueden ser la primera cuota de una casa para su familia. Quiere saber mas? SIN COSTO, responda SI o NO	Pendiente	2018-11-22	2018-11-22
976262	75076604	AM	3127662957	2018-11-22 10:43:23	2018-11-22 10:43:24	Sus cesantias en el FNA pueden ser la primera cuota de una casa. Hay subsidios disponibles, preguntelos. Quiere saber mas? SIN COSTO, responda SI o NO	Pendiente	2018-11-22	2018-11-22
980378	40033009	AM	3212781452	2018-11-22 10:43:23	2018-11-22 10:43:24	GLORIA Sus cesantias en el FNA pueden ser la primera cuota de una casa. En 2018 financiamos 9669 clientes como Ud. Quiere saber mas? SIN COSTO, responda SI o NO	Pendiente	2018-11-22	2018-11-22
982438	66866356	AM	3167578903	2018-11-22 10:43:23	2018-11-22 10:43:24	GLORIA No deje pasar el tiempo. Sus cesantias en el FNA pueden ser la primera cuota de una casa. Quiere saber mas? SIN COSTO, responda SI o NO	Pendiente	2018-11-22	2018-11-22
988398	10289331	AM	3137371198	2018-11-22 10:43:23	2018-11-22 10:43:24	Sea propietario! Sus cesantias en el FNA pueden ser la primera cuota de una casa. Quiere saber mas? SIN COSTO, responda SI o NO	Pendiente	2018-11-22	2018-11-22
994515	75094712	AM	3117154371	2018-11-22 10:43:23	2018-11-22 10:43:24	No deje pasar el tiempo. Sus cesantias en el FNA pueden ser la primera cuota de una casa. Quiere saber mas? SIN COSTO, responda SI o NO	Pendiente	2018-11-22	2018-11-22
998264	76320567	AM	3007867865	2018-11-22 10:43:23	2018-11-22 10:43:24	JHON Sus cesantias en el FNA pueden ser la primera cuota de una casa para su familia. Quiere saber mas? SIN COSTO, responda SI o NO	Pendiente	2018-11-22	2018-11-22
5298339	13501331	AM	3173742589	2018-11-22 10:43:23	2018-11-22 10:43:24	Sus cesantias en el FNA pueden ser la primera cuota de una casa. Hay subsidios disponibles, preguntelos. Quiere saber mas? SIN COSTO, responda SI o NO	Pendiente	2018-11-22	2018-11-22
5308869	57292712	AM	3007356343	2018-11-22 10:43:23	2018-11-22 10:43:24	Sus cesantias en el FNA pueden ser la primera cuota de una casa para su familia. Quiere saber mas? SIN COSTO, responda SI o NO	Pendiente	2018-11-22	2018-11-22
5310183	13276775	AM	3202624862	2018-11-22 10:43:23	2018-11-22 10:43:55	ORLANDO Sus cesantias en el FNA pueden ser la primera cuota de una casa para su familia. Quiere saber mas? SIN COSTO, responda SI o NO	SI	2018-11-22	2018-11-22	Muchas gracias por su respuesta. Un asesor del fondo Nacional del Ahorro se comunicara con usted.
5318404	16536401	AM	3165785361	2018-11-22 10:43:23	2018-11-22 10:43:24	WILSON No deje pasar el tiempo. Sus cesantias en el FNA pueden ser la primera cuota de una casa. Quiere saber mas? SIN COSTO, responda SI o NO	Pendiente	2018-11-22	2018-11-22
5319613	43012636	AM	3117623295	2018-11-22 10:43:23	2018-11-22 10:43:24	ANA No deje pasar el tiempo. Sus cesantias en el FNA pueden ser la primera cuota de una casa. Quiere saber mas? SIN COSTO, responda SI o NO	Pendiente	2018-11-22	2018-11-22
5329673	53083012	AM	3005664914	2018-11-22 10:43:23	2018-11-22 10:43:24	Sea propietario! Sus cesantias en el FNA pueden ser la primera cuota de una casa. Quiere saber mas? SIN COSTO, responda SI o NO	Pendiente	2018-11-22	2018-11-22
5338396	21481840	AM	3177825497	2018-11-22 10:43:23	2018-11-22 10:43:24	Sus cesantias en el FNA pueden ser la primera cuota de una casa en MEDELLIN. Quiere saber mas? SIN COSTO, responda SI o NO	Pendiente	2018-11-22	2018-11-22
5351290	79655339	AM	3164822796	2018-11-22 10:43:23	2018-11-22 10:43:24	JAMES Sea propietario! Sus cesantias en el FNA pueden ser la primera cuota de una casa. Quiere saber mas? SIN COSTO, responda SI o NO	Pendiente	2018-11-22	2018-11-22
5356533	71746396	AM	3176686813	2018-11-22 10:43:23	2018-11-22 10:43:24	Sus cesantias en el FNA pueden ser la primera cuota de una casa. Quiere saber mas? SIN COSTO, responda SI o NO	Pendiente	2018-11-22	2018-11-22
5359754	71785900	AM	3104617287	2018-11-22 10:43:23	2018-11-22 10:43:24	FRANCISCO Sus cesantias en el FNA pueden ser la primera cuota de una casa para su familia. Quiere saber mas? SIN COSTO, responda SI o NO	Pendiente	2018-11-22	2018-11-22
5369041	55307312	AM	3016445100	2018-11-22 10:43:23	2018-11-22 10:43:24	DEYSI Sus cesantias en el FNA pueden ser la primera cuota de una casa. Hay subsidios disponibles, preguntelos. Quiere saber mas? SIN COSTO, responda SI o NO	Pendiente	2018-11-22	2018-11-22
5375980	8756621	AM	3103540784	2018-11-22 10:43:23	2018-11-22 10:43:24	Sus cesantias en el FNA pueden ser la primera cuota de una casa. En 2018 financiamos 9669 clientes como Ud. Quiere saber mas? SIN COSTO, responda SI o NO	Pendiente	2018-11-22	2018-11-22
5377394	37080870	AM	3006926386	2018-11-22 10:43:23	2018-11-22 10:43:24	ANDREA No deje pasar el tiempo. Sus cesantias en el FNA pueden ser la primera cuota de una casa. Quiere saber mas? SIN COSTO, responda SI o NO	Pendiente	2018-11-22	2018-11-22
5378922	42754717	AM	3137031229	2018-11-22 10:43:23	2018-11-22 10:43:24	Sus cesantias en el FNA pueden ser la primera cuota de una casa. Quiere saber mas? SIN COSTO, responda SI o NO	Pendiente	2018-11-22	2018-11-22
5383848	72339353	AM	3005563963	2018-11-22 10:43:23	2018-11-22 10:55:47	Sea propietario! Sus cesantias en el FNA pueden ser la primera cuota de una casa. Quiere saber mas? SIN COSTO, responda SI o NO	SI	2018-11-22	2018-11-22	Muchas gracias por su respuesta. Un asesor del fondo Nacional del Ahorro se comunicara con usted.
5387531	1105673540	AM	3142329084	2018-11-22 10:43:23	2018-11-22 10:43:24	VIVIANA Sus cesantias en el FNA pueden ser la primera cuota de una casa. Hay subsidios disponibles, preguntelos. Quiere saber mas? SIN COSTO, responda SI o NO	Pendiente	2018-11-22	2018-11-22
5392367	73214799	AM	3106844897	2018-11-22 10:43:23	2018-11-22 10:43:24	Sus cesantias en el FNA pueden ser la primera cuota de una casa. Hay subsidios disponibles, preguntelos. Quiere saber mas? SIN COSTO, responda SI o NO	Pendiente	2018-11-22	2018-11-22
5394334	71701754	AM	3002120542	2018-11-22 10:43:23	2018-11-22 10:43:24	Sus cesantias en el FNA pueden ser la primera cuota de una casa. Quiere saber mas? SIN COSTO, responda SI o NO	Pendiente	2018-11-22	2018-11-22
7090575	1143332304	AM	3148007446	2018-11-22 10:43:23	2018-11-22 10:43:24	Sus cesantias en el FNA pueden ser la primera cuota de una casa en CARTAGENA. Quiere saber mas? SIN COSTO, responda SI o NO	Pendiente	2018-11-22	2018-11-22
7100523	30295319	AM	3167438509	2018-11-22 10:43:23	2018-11-22 10:43:24	Sus cesantias en el FNA pueden ser la primera cuota de una casa. En 2018 financiamos 9669 clientes como Ud. Quiere saber mas? SIN COSTO, responda SI o NO	Pendiente	2018-11-22	2018-11-22
7100527	10260449	AM	3122698690	2018-11-22 10:43:23	2018-11-22 10:43:24	Sus cesantias en el FNA pueden ser la primera cuota de una casa en MANIZALES. Quiere saber mas? SIN COSTO, responda SI o NO	Pendiente	2018-11-22	2018-11-22
7111631	1128056844	AM	3207342217	2018-11-22 10:43:23	2018-11-22 10:43:24	MELISSA No deje pasar el tiempo. Sus cesantias en el FNA pueden ser la primera cuota de una casa. Quiere saber mas? SIN COSTO, responda SI o NO	Pendiente	2018-11-22	2018-11-22
7114147	52370532	AM	3138887829	2018-11-22 10:43:23	2018-11-22 10:43:24	YISED Sus cesantias en el FNA pueden ser la primera cuota de una casa en DUITAMA. Quiere saber mas? SIN COSTO, responda SI o NO	Pendiente	2018-11-22	2018-11-22
7119809	34537276	AM	3168766651	2018-11-22 10:43:23	2018-11-22 10:43:24	Sus cesantias en el FNA pueden ser la primera cuota de una casa en CALI. Quiere saber mas? SIN COSTO, responda SI o NO	Pendiente	2018-11-22	2018-11-22
7131099	71796769	AM	3107453446	2018-11-22 10:43:23	2018-11-22 10:48:25	JAIME Sus cesantias en el FNA pueden ser la primera cuota de una casa. En 2018 financiamos 9669 clientes como Ud. Quiere saber mas? SIN COSTO, responda SI o NO	SI	2018-11-22	2018-11-22	Muchas gracias por su respuesta. Un asesor del fondo Nacional del Ahorro se comunicara con usted.
7131678	43206668	AM	3148145207	2018-11-22 10:43:23	2018-11-22 10:43:24	CLAUDIA Sus cesantias en el FNA pueden ser la primera cuota de una casa. Hay subsidios disponibles, preguntelos. Quiere saber mas? SIN COSTO, responda SI o NO	Pendiente	2018-11-22	2018-11-22
7138791	71339755	AM	3146850020	2018-11-22 10:43:23	2018-11-22 10:43:24	JOSE Sus cesantias en el FNA pueden ser la primera cuota de una casa en MEDELLIN. Quiere saber mas? SIN COSTO, responda SI o NO	Pendiente	2018-11-22	2018-11-22
7151482	43856550	AM	3104420076	2018-11-22 10:43:23	2018-11-22 10:43:24	Sus cesantias en el FNA pueden ser la primera cuota de una casa. Quiere saber mas? SIN COSTO, responda SI o NO	Pendiente	2018-11-22	2018-11-22
557447	6771596	AM	3118278324	2018-11-22 10:43:23	2018-11-22 10:43:24	No deje pasar el tiempo. Sus cesantias en el FNA pueden ser la primera cuota de una casa. Quiere saber mas? SIN COSTO, responda SI o NO	Pendiente	2018-11-22	2018-11-22
558415	30738586	AM	3005379990	2018-11-22 10:43:23	2018-11-22 10:43:24	Sus cesantias en el FNA pueden ser la primera cuota de una casa. En 2018 financiamos 9669 clientes como Ud. Quiere saber mas? SIN COSTO, responda SI o NO	Pendiente	2018-11-22	2018-11-22
562344	25276005	AM	3113104630	2018-11-22 10:43:23	2018-11-22 10:43:24	No deje pasar el tiempo. Sus cesantias en el FNA pueden ser la primera cuota de una casa. Quiere saber mas? SIN COSTO, responda SI o NO	Pendiente	2018-11-22	2018-11-22
562967	32677726	AM	3004853401	2018-11-22 10:43:23	2018-11-22 10:43:24	Sus cesantias en el FNA pueden ser la primera cuota de una casa. Hay subsidios disponibles, preguntelos. Quiere saber mas? SIN COSTO, responda SI o NO	Pendiente	2018-11-22	2018-11-22
564451	60349341	AM	3112179765	2018-11-22 10:43:23	2018-11-22 10:43:24	Sus cesantias en el FNA pueden ser la primera cuota de una casa para su familia. Quiere saber mas? SIN COSTO, responda SI o NO	Pendiente	2018-11-22	2018-11-22
566493	7165279	AM	3163036001	2018-11-22 10:43:23	2018-11-22 10:43:24	Sus cesantias en el FNA pueden ser la primera cuota de una casa. Hay subsidios disponibles, preguntelos. Quiere saber mas? SIN COSTO, responda SI o NO	Pendiente	2018-11-22	2018-11-22
566959	59814404	AM	3186638472	2018-11-22 10:43:23	2018-11-22 10:43:24	No deje pasar el tiempo. Sus cesantias en el FNA pueden ser la primera cuota de una casa. Quiere saber mas? SIN COSTO, responda SI o NO	Pendiente	2018-11-22	2018-11-22
568818	32707809	AM	3017546091	2018-11-22 10:43:23	2018-11-22 10:43:24	Sus cesantias en el FNA pueden ser la primera cuota de una casa. En 2018 financiamos 9669 clientes como Ud. Quiere saber mas? SIN COSTO, responda SI o NO	Pendiente	2018-11-22	2018-11-22
569731	36307013	AM	3163991299	2018-11-22 10:43:23	2018-11-22 10:43:24	LIDA Sus cesantias en el FNA pueden ser la primera cuota de una casa en NEIVA. Quiere saber mas? SIN COSTO, responda SI o NO	Pendiente	2018-11-22	2018-11-22
571313	35264458	AM	3203281295	2018-11-22 10:43:23	2018-11-22 10:43:24	Sus cesantias en el FNA pueden ser la primera cuota de una casa. Hay subsidios disponibles, preguntelos. Quiere saber mas? SIN COSTO, responda SI o NO	Pendiente	2018-11-22	2018-11-22
572919	71588455	AM	3003128685	2018-11-22 10:43:23	2018-11-22 10:43:24	LUIS Sus cesantias en el FNA pueden ser la primera cuota de una casa. Hay subsidios disponibles, preguntelos. Quiere saber mas? SIN COSTO, responda SI o NO	Pendiente	2018-11-22	2018-11-22
573462	45471934	AM	3145380251	2018-11-22 10:43:23	2018-11-22 10:43:24	No deje pasar el tiempo. Sus cesantias en el FNA pueden ser la primera cuota de una casa. Quiere saber mas? SIN COSTO, responda SI o NO	Pendiente	2018-11-22	2018-11-22
574197	60258832	AM	3115924712	2018-11-22 10:43:23	2018-11-22 10:43:24	MAGDA Sus cesantias en el FNA pueden ser la primera cuota de una casa para su familia. Quiere saber mas? SIN COSTO, responda SI o NO	Pendiente	2018-11-22	2018-11-22
575351	79689777	AM	3212049654	2018-11-22 10:43:23	2018-11-22 10:43:24	Sus cesantias en el FNA pueden ser la primera cuota de una casa. Hay subsidios disponibles, preguntelos. Quiere saber mas? SIN COSTO, responda SI o NO	Pendiente	2018-11-22	2018-11-22
576288	22580774	AM	3166553992	2018-11-22 10:43:23	2018-11-22 10:43:24	Sus cesantias en el FNA pueden ser la primera cuota de una casa en POPAYAN. Quiere saber mas? SIN COSTO, responda SI o NO	Pendiente	2018-11-22	2018-11-22
577677	66848955	AM	3108433999	2018-11-22 10:43:23	2018-11-22 10:43:24	Sus cesantias en el FNA pueden ser la primera cuota de una casa. En 2018 financiamos 9669 clientes como Ud. Quiere saber mas? SIN COSTO, responda SI o NO	Pendiente	2018-11-22	2018-11-22
578636	60257884	AM	3002406303	2018-11-22 10:43:23	2018-11-22 10:43:24	Sus cesantias en el FNA pueden ser la primera cuota de una casa para su familia. Quiere saber mas? SIN COSTO, responda SI o NO	Pendiente	2018-11-22	2018-11-22
579199	19280773	AM	3115629767	2018-11-22 10:43:23	2018-11-22 10:43:24	OMAR Sus cesantias en el FNA pueden ser la primera cuota de una casa. En 2018 financiamos 9669 clientes como Ud. Quiere saber mas? SIN COSTO, responda SI o NO	Pendiente	2018-11-22	2018-11-22
579494	79758433	AM	3208954906	2018-11-22 10:43:23	2018-11-22 10:43:24	Sus cesantias en el FNA pueden ser la primera cuota de una casa en VILLAVICENCIO. Quiere saber mas? SIN COSTO, responda SI o NO	Pendiente	2018-11-22	2018-11-22
580619	46663534	AM	3123100992	2018-11-22 10:43:23	2018-11-22 10:43:24	LILIANA Sus cesantias en el FNA pueden ser la primera cuota de una casa. Hay subsidios disponibles, preguntelos. Quiere saber mas? SIN COSTO, responda SI o NO	Pendiente	2018-11-22	2018-11-22
583470	6767706	AM	3213977614	2018-11-22 10:43:23	2018-11-22 10:43:24	Sus cesantias en el FNA pueden ser la primera cuota de una casa en TUNJA. Quiere saber mas? SIN COSTO, responda SI o NO	Pendiente	2018-11-22	2018-11-22
586560	31937710	AM	3155733283	2018-11-22 10:43:23	2018-11-22 10:43:24	MARIA Sus cesantias en el FNA pueden ser la primera cuota de una casa. En 2018 financiamos 9669 clientes como Ud. Quiere saber mas? SIN COSTO, responda SI o NO	Pendiente	2018-11-22	2018-11-22
586986	63318445	AM	3145958148	2018-11-22 10:43:23	2018-11-22 10:43:24	Sus cesantias en el FNA pueden ser la primera cuota de una casa. En 2018 financiamos 9669 clientes como Ud. Quiere saber mas? SIN COSTO, responda SI o NO	Pendiente	2018-11-22	2018-11-22
587899	4297622	AM	3125518236	2018-11-22 10:43:23	2018-11-22 10:43:24	Sus cesantias en el FNA pueden ser la primera cuota de una casa. Hay subsidios disponibles, preguntelos. Quiere saber mas? SIN COSTO, responda SI o NO	Pendiente	2018-11-22	2018-11-22
588183	10223039	AM	3136154920	2018-11-22 10:43:23	2018-11-22 10:43:24	RAMIRO No deje pasar el tiempo. Sus cesantias en el FNA pueden ser la primera cuota de una casa. Quiere saber mas? SIN COSTO, responda SI o NO	Pendiente	2018-11-22	2018-11-22
588323	70564334	AM	3154355698	2018-11-22 10:43:23	2018-11-22 10:43:24	ELKIN No deje pasar el tiempo. Sus cesantias en el FNA pueden ser la primera cuota de una casa. Quiere saber mas? SIN COSTO, responda SI o NO	Pendiente	2018-11-22	2018-11-22
589008	79064455	AM	3115380906	2018-11-22 10:43:23	2018-11-22 10:43:24	Sea propietario! Sus cesantias en el FNA pueden ser la primera cuota de una casa. Quiere saber mas? SIN COSTO, responda SI o NO	Pendiente	2018-11-22	2018-11-22
589406	40045960	AM	3112254536	2018-11-22 10:43:23	2018-11-22 10:43:24	No deje pasar el tiempo. Sus cesantias en el FNA pueden ser la primera cuota de una casa. Quiere saber mas? SIN COSTO, responda SI o NO	Pendiente	2018-11-22	2018-11-22
590046	65753764	AM	3103232144	2018-11-22 10:43:23	2018-11-22 10:43:24	BENICIA Sea propietario! Sus cesantias en el FNA pueden ser la primera cuota de una casa. Quiere saber mas? SIN COSTO, responda SI o NO	Pendiente	2018-11-22	2018-11-22
590565	72165434	AM	3155091855	2018-11-22 10:43:23	2018-11-22 10:43:24	RAFAEL No deje pasar el tiempo. Sus cesantias en el FNA pueden ser la primera cuota de una casa. Quiere saber mas? SIN COSTO, responda SI o NO	Pendiente	2018-11-22	2018-11-22
591512	56056140	AM	3002474365	2018-11-22 10:43:23	2018-11-22 13:53:47	Sea propietario! Sus cesantias en el FNA pueden ser la primera cuota de una casa. Quiere saber mas? SIN COSTO, responda SI o NO	SI	2018-11-22	2018-11-22	Muchas gracias por su respuesta. Un asesor del fondo Nacional del Ahorro se comunicara con usted.
593294	60311712	AM	3183903059	2018-11-22 10:43:23	2018-11-22 10:43:24	YANETH Sus cesantias en el FNA pueden ser la primera cuota de una casa para su familia. Quiere saber mas? SIN COSTO, responda SI o NO	Pendiente	2018-11-22	2018-11-22
594279	3799845	AM	3106560465	2018-11-22 10:43:23	2018-11-22 10:43:24	RAFAEL Sus cesantias en el FNA pueden ser la primera cuota de una casa para su familia. Quiere saber mas? SIN COSTO, responda SI o NO	Pendiente	2018-11-22	2018-11-22
597175	7214195	AM	3157915346	2018-11-22 10:43:23	2018-11-22 10:43:24	No deje pasar el tiempo. Sus cesantias en el FNA pueden ser la primera cuota de una casa. Quiere saber mas? SIN COSTO, responda SI o NO	Pendiente	2018-11-22	2018-11-22
597489	23553081	AM	3112134750	2018-11-22 10:43:23	2018-11-22 10:43:24	MARIA Sus cesantias en el FNA pueden ser la primera cuota de una casa en TUNJA. Quiere saber mas? SIN COSTO, responda SI o NO	Pendiente	2018-11-22	2018-11-22
598388	26952616	AM	3163848500	2018-11-22 10:43:23	2018-11-22 10:43:24	NUBIS Sus cesantias en el FNA pueden ser la primera cuota de una casa. Hay subsidios disponibles, preguntelos. Quiere saber mas? SIN COSTO, responda SI o NO	Pendiente	2018-11-22	2018-11-22
600394	46360334	AM	3112174499	2018-11-22 10:43:23	2018-11-22 10:43:24	Sus cesantias en el FNA pueden ser la primera cuota de una casa para su familia. Quiere saber mas? SIN COSTO, responda SI o NO	Pendiente	2018-11-22	2018-11-22
602144	12975932	AM	3155302196	2018-11-22 10:43:23	2018-11-22 10:43:25	Sus cesantias en el FNA pueden ser la primera cuota de una casa para su familia. Quiere saber mas? SIN COSTO, responda SI o NO	Pendiente	2018-11-22	2018-11-22
602920	16270041	AM	3155055148	2018-11-22 10:43:23	2018-11-22 10:43:25	No deje pasar el tiempo. Sus cesantias en el FNA pueden ser la primera cuota de una casa. Quiere saber mas? SIN COSTO, responda SI o NO	Pendiente	2018-11-22	2018-11-22
603310	25059218	AM	3122289035	2018-11-22 10:43:23	2018-11-22 10:43:25	GLORIA Sus cesantias en el FNA pueden ser la primera cuota de una casa para su familia. Quiere saber mas? SIN COSTO, responda SI o NO	Pendiente	2018-11-22	2018-11-22
603597	66986159	AM	3165319792	2018-11-22 10:43:23	2018-11-22 10:43:25	MARIA No deje pasar el tiempo. Sus cesantias en el FNA pueden ser la primera cuota de una casa. Quiere saber mas? SIN COSTO, responda SI o NO	Pendiente	2018-11-22	2018-11-22
603857	74753736	AM	3113391385	2018-11-22 10:43:23	2018-11-22 10:43:25	Sea propietario! Sus cesantias en el FNA pueden ser la primera cuota de una casa. Quiere saber mas? SIN COSTO, responda SI o NO	Pendiente	2018-11-22	2018-11-22
604587	73105328	AM	3106502828	2018-11-22 10:43:23	2018-11-22 10:43:25	Sus cesantias en el FNA pueden ser la primera cuota de una casa. En 2018 financiamos 9669 clientes como Ud. Quiere saber mas? SIN COSTO, responda SI o NO	Pendiente	2018-11-22	2018-11-22
605071	13501814	AM	3144186683	2018-11-22 10:43:23	2018-11-22 10:43:25	Sus cesantias en el FNA pueden ser la primera cuota de una casa. Hay subsidios disponibles, preguntelos. Quiere saber mas? SIN COSTO, responda SI o NO	Pendiente	2018-11-22	2018-11-22
605887	76317315	AM	3155861922	2018-11-22 10:43:23	2018-11-22 10:45:56	MARLON Sus cesantias en el FNA pueden ser la primera cuota de una casa en POPAYAN. Quiere saber mas? SIN COSTO, responda SI o NO	SI	2018-11-22	2018-11-22	Muchas gracias por su respuesta. Un asesor del fondo Nacional del Ahorro se comunicara con usted.
608668	34609476	AM	3128340554	2018-11-22 10:43:23	2018-11-22 10:43:25	MERLY Sea propietario! Sus cesantias en el FNA pueden ser la primera cuota de una casa. Quiere saber mas? SIN COSTO, responda SI o NO	Pendiente	2018-11-22	2018-11-22
609862	34599756	AM	3208953722	2018-11-22 10:43:23	2018-11-22 10:43:25	Sus cesantias en el FNA pueden ser la primera cuota de una casa. Quiere saber mas? SIN COSTO, responda SI o NO	Pendiente	2018-11-22	2018-11-22
611512	7305383	AM	3112380686	2018-11-22 10:43:23	2018-11-22 10:43:25	JACINTO Sea propietario! Sus cesantias en el FNA pueden ser la primera cuota de una casa. Quiere saber mas? SIN COSTO, responda SI o NO	Pendiente	2018-11-22	2018-11-22
612095	34553254	AM	3114194678	2018-11-22 10:43:23	2018-11-22 10:43:25	Sus cesantias en el FNA pueden ser la primera cuota de una casa. En 2018 financiamos 9669 clientes como Ud. Quiere saber mas? SIN COSTO, responda SI o NO	Pendiente	2018-11-22	2018-11-22
1688844	65750824	AM	3152647441	2018-11-22 10:43:23	2018-11-22 10:43:25	MARA No deje pasar el tiempo. Sus cesantias en el FNA pueden ser la primera cuota de una casa. Quiere saber mas? SIN COSTO, responda SI o NO	Pendiente	2018-11-22	2018-11-22
1696660	22805916	AM	3124576718	2018-11-22 10:43:23	2018-11-22 10:43:25	KELLY Sus cesantias en el FNA pueden ser la primera cuota de una casa. Hay subsidios disponibles, preguntelos. Quiere saber mas? SIN COSTO, responda SI o NO	Pendiente	2018-11-22	2018-11-22
1709955	21182324	AM	3208493655	2018-11-22 10:43:23	2018-11-22 10:43:25	DORALY Sus cesantias en el FNA pueden ser la primera cuota de una casa. En 2018 financiamos 9669 clientes como Ud. Quiere saber mas? SIN COSTO, responda SI o NO	Pendiente	2018-11-22	2018-11-22
1713964	31174583	AM	3155507434	2018-11-22 10:43:23	2018-11-22 10:43:25	MIRTA Sea propietario! Sus cesantias en el FNA pueden ser la primera cuota de una casa. Quiere saber mas? SIN COSTO, responda SI o NO	Pendiente	2018-11-22	2018-11-22
1714713	8012766	AM	3136220449	2018-11-22 10:43:23	2018-11-22 11:11:32	EDILIO Sus cesantias en el FNA pueden ser la primera cuota de una casa. En 2018 financiamos 9669 clientes como Ud. Quiere saber mas? SIN COSTO, responda SI o NO	SI	2018-11-22	2018-11-22	Muchas gracias por su respuesta. Un asesor del fondo Nacional del Ahorro se comunicara con usted.
1735089	33206759	AM	3145402017	2018-11-22 10:43:23	2018-11-22 10:43:25	MARLYN Sus cesantias en el FNA pueden ser la primera cuota de una casa. Hay subsidios disponibles, preguntelos. Quiere saber mas? SIN COSTO, responda SI o NO	Pendiente	2018-11-22	2018-11-22
1750225	65783021	AM	3143339173	2018-11-22 10:43:23	2018-11-22 10:43:25	ANGELA Sus cesantias en el FNA pueden ser la primera cuota de una casa en IBAGUE. Quiere saber mas? SIN COSTO, responda SI o NO	Pendiente	2018-11-22	2018-11-22
1756532	73090697	AM	3003959173	2018-11-22 10:43:23	2018-11-22 10:43:25	Sus cesantias en el FNA pueden ser la primera cuota de una casa para su familia. Quiere saber mas? SIN COSTO, responda SI o NO	Pendiente	2018-11-22	2018-11-22
1762082	8705016	AM	3113775890	2018-11-22 10:43:23	2018-11-22 10:43:25	BORIS Sus cesantias en el FNA pueden ser la primera cuota de una casa en CALI. Quiere saber mas? SIN COSTO, responda SI o NO	Pendiente	2018-11-22	2018-11-22
1764466	74370674	AM	3132855082	2018-11-22 10:43:23	2018-11-22 19:10:11	MARIO Sus cesantias en el FNA pueden ser la primera cuota de una casa en DUITAMA. Quiere saber mas? SIN COSTO, responda SI o NO	SI	2018-11-22	2018-11-22	Muchas gracias por su respuesta. Un asesor del fondo Nacional del Ahorro se comunicara con usted.
1767075	4356642	AM	3206802322	2018-11-22 10:43:23	2018-11-22 10:43:25	Sus cesantias en el FNA pueden ser la primera cuota de una casa. Quiere saber mas? SIN COSTO, responda SI o NO	Pendiente	2018-11-22	2018-11-22
1778790	53122704	AM	3135863030	2018-11-22 10:43:23	2018-11-22 10:43:25	No deje pasar el tiempo. Sus cesantias en el FNA pueden ser la primera cuota de una casa. Quiere saber mas? SIN COSTO, responda SI o NO	Pendiente	2018-11-22	2018-11-22
3626202	55162389	AM	3177707236	2018-11-22 10:43:23	2018-11-22 10:43:25	CLARA Sus cesantias en el FNA pueden ser la primera cuota de una casa. Hay subsidios disponibles, preguntelos. Quiere saber mas? SIN COSTO, responda SI o NO	Pendiente	2018-11-22	2018-11-22
3626621	63321474	AM	3172187684	2018-11-22 10:43:23	2018-11-22 10:43:25	LUZ Sea propietario! Sus cesantias en el FNA pueden ser la primera cuota de una casa. Quiere saber mas? SIN COSTO, responda SI o NO	Pendiente	2018-11-22	2018-11-22
3632659	42065489	AM	3163662437	2018-11-22 10:43:23	2018-11-22 10:43:25	MARTHA Sus cesantias en el FNA pueden ser la primera cuota de una casa. Hay subsidios disponibles, preguntelos. Quiere saber mas? SIN COSTO, responda SI o NO	Pendiente	2018-11-22	2018-11-22
3639614	40368094	AM	3133231933	2018-11-22 10:43:23	2018-11-22 10:43:25	Sus cesantias en el FNA pueden ser la primera cuota de una casa. Quiere saber mas? SIN COSTO, responda SI o NO	Pendiente	2018-11-22	2018-11-22
3641106	32891196	AM	3014646402	2018-11-22 10:43:23	2018-11-22 10:43:25	Sea propietario! Sus cesantias en el FNA pueden ser la primera cuota de una casa. Quiere saber mas? SIN COSTO, responda SI o NO	Pendiente	2018-11-22	2018-11-22
3642592	80099868	AM	3102789254	2018-11-22 10:43:23	2018-11-22 10:43:25	Sus cesantias en el FNA pueden ser la primera cuota de una casa en NEIVA. Quiere saber mas? SIN COSTO, responda SI o NO	Pendiente	2018-11-22	2018-11-22
3645462	36536052	AM	3008033735	2018-11-22 10:43:23	2018-11-22 10:43:25	No deje pasar el tiempo. Sus cesantias en el FNA pueden ser la primera cuota de una casa. Quiere saber mas? SIN COSTO, responda SI o NO	Pendiente	2018-11-22	2018-11-22
3647607	46670194	AM	3132655734	2018-11-22 10:43:23	2018-11-22 10:43:25	ANA Sea propietario! Sus cesantias en el FNA pueden ser la primera cuota de una casa. Quiere saber mas? SIN COSTO, responda SI o NO	Pendiente	2018-11-22	2018-11-22
3648289	12985179	AM	3178225902	2018-11-22 10:43:23	2018-11-22 10:43:25	Sus cesantias en el FNA pueden ser la primera cuota de una casa para su familia. Quiere saber mas? SIN COSTO, responda SI o NO	Pendiente	2018-11-22	2018-11-22
3670469	13700839	AM	3142536003	2018-11-22 10:43:23	2018-11-22 10:43:25	No deje pasar el tiempo. Sus cesantias en el FNA pueden ser la primera cuota de una casa. Quiere saber mas? SIN COSTO, responda SI o NO	Pendiente	2018-11-22	2018-11-22
3678167	1090388896	AM	3159251829	2018-11-22 10:43:23	2018-11-22 10:43:25	No deje pasar el tiempo. Sus cesantias en el FNA pueden ser la primera cuota de una casa. Quiere saber mas? SIN COSTO, responda SI o NO	Pendiente	2018-11-22	2018-11-22
3691131	52697977	AM	3007072885	2018-11-22 10:43:23	2018-11-22 10:43:25	CAROLINA Sus cesantias en el FNA pueden ser la primera cuota de una casa para su familia. Quiere saber mas? SIN COSTO, responda SI o NO	Pendiente	2018-11-22	2018-11-22
3695728	9534564	AM	3108028645	2018-11-22 10:43:23	2018-11-22 10:43:25	No deje pasar el tiempo. Sus cesantias en el FNA pueden ser la primera cuota de una casa. Quiere saber mas? SIN COSTO, responda SI o NO	Pendiente	2018-11-22	2018-11-22
3698110	1067846913	AM	3016851214	2018-11-22 10:43:23	2018-11-22 10:43:25	Sus cesantias en el FNA pueden ser la primera cuota de una casa para su familia. Quiere saber mas? SIN COSTO, responda SI o NO	Pendiente	2018-11-22	2018-11-22
3699999	16658639	AM	3155245776	2018-11-22 10:43:23	2018-11-22 10:43:25	JAIME No deje pasar el tiempo. Sus cesantias en el FNA pueden ser la primera cuota de una casa. Quiere saber mas? SIN COSTO, responda SI o NO	Pendiente	2018-11-22	2018-11-22
3707641	15619499	AM	3122571954	2018-11-22 10:43:23	2018-11-22 10:43:25	TOMAS Sus cesantias en el FNA pueden ser la primera cuota de una casa para su familia. Quiere saber mas? SIN COSTO, responda SI o NO	Pendiente	2018-11-22	2018-11-22
3719530	1094247350	AM	3214519748	2018-11-22 10:43:23	2018-11-22 10:43:25	No deje pasar el tiempo. Sus cesantias en el FNA pueden ser la primera cuota de una casa. Quiere saber mas? SIN COSTO, responda SI o NO	Pendiente	2018-11-22	2018-11-22
3723262	8678132	AM	3145958500	2018-11-22 10:43:23	2018-11-22 10:43:25	Sus cesantias en el FNA pueden ser la primera cuota de una casa. Hay subsidios disponibles, preguntelos. Quiere saber mas? SIN COSTO, responda SI o NO	Pendiente	2018-11-22	2018-11-22
5507451	46384261	AM	3166195191	2018-11-22 10:43:23	2018-11-22 10:43:25	DIANA Sea propietario! Sus cesantias en el FNA pueden ser la primera cuota de una casa. Quiere saber mas? SIN COSTO, responda SI o NO	Pendiente	2018-11-22	2018-11-22
5511104	76320153	AM	3188973543	2018-11-22 10:43:23	2018-11-22 10:43:25	Sus cesantias en el FNA pueden ser la primera cuota de una casa en POPAYAN. Quiere saber mas? SIN COSTO, responda SI o NO	Pendiente	2018-11-22	2018-11-22
5516270	98553044	AM	3155385949	2018-11-22 10:43:23	2018-11-22 10:43:25	ANGEL No deje pasar el tiempo. Sus cesantias en el FNA pueden ser la primera cuota de una casa. Quiere saber mas? SIN COSTO, responda SI o NO	Pendiente	2018-11-22	2018-11-22
5531280	73485240	AM	3016357593	2018-11-22 10:43:23	2018-11-22 10:43:25	Sus cesantias en el FNA pueden ser la primera cuota de una casa. Quiere saber mas? SIN COSTO, responda SI o NO	Pendiente	2018-11-22	2018-11-22
5538613	94413700	AM	3127589506	2018-11-22 10:43:23	2018-11-22 10:43:25	Sus cesantias en el FNA pueden ser la primera cuota de una casa. Hay subsidios disponibles, preguntelos. Quiere saber mas? SIN COSTO, responda SI o NO	Pendiente	2018-11-22	2018-11-22
5546733	37085280	AM	3014504145	2018-11-22 10:43:23	2018-11-22 12:07:48	Sus cesantias en el FNA pueden ser la primera cuota de una casa. En 2018 financiamos 9669 clientes como Ud. Quiere saber mas? SIN COSTO, responda SI o NO	SI	2018-11-22	2018-11-22	Muchas gracias por su respuesta. Un asesor del fondo Nacional del Ahorro se comunicara con usted.
5551832	43015396	AM	3148124509	2018-11-22 10:43:23	2018-11-22 10:44:20	Sus cesantias en el FNA pueden ser la primera cuota de una casa. Quiere saber mas? SIN COSTO, responda SI o NO	SI	2018-11-22	2018-11-22	Muchas gracias por su respuesta. Un asesor del fondo Nacional del Ahorro se comunicara con usted.
5571691	39175701	AM	3128582159	2018-11-22 10:43:23	2018-11-22 10:43:25	DIANA No deje pasar el tiempo. Sus cesantias en el FNA pueden ser la primera cuota de una casa. Quiere saber mas? SIN COSTO, responda SI o NO	Pendiente	2018-11-22	2018-11-22
5596246	91534951	AM	3219004704	2018-11-22 10:43:23	2018-11-22 10:43:25	Sus cesantias en el FNA pueden ser la primera cuota de una casa. En 2018 financiamos 9669 clientes como Ud. Quiere saber mas? SIN COSTO, responda SI o NO	Pendiente	2018-11-22	2018-11-22
5602234	60294890	AM	3172715511	2018-11-22 10:43:23	2018-11-22 10:43:25	SARA Sus cesantias en el FNA pueden ser la primera cuota de una casa. Hay subsidios disponibles, preguntelos. Quiere saber mas? SIN COSTO, responda SI o NO	Pendiente	2018-11-22	2018-11-22
5604227	1121898250	AM	3214229139	2018-11-22 10:43:23	2018-11-22 10:43:25	Sea propietario! Sus cesantias en el FNA pueden ser la primera cuota de una casa. Quiere saber mas? SIN COSTO, responda SI o NO	Pendiente	2018-11-22	2018-11-22
5605237	94414231	AM	3104574396	2018-11-22 10:43:23	2018-11-22 10:43:25	JANSEL No deje pasar el tiempo. Sus cesantias en el FNA pueden ser la primera cuota de una casa. Quiere saber mas? SIN COSTO, responda SI o NO	Pendiente	2018-11-22	2018-11-22
5607300	73101214	AM	3005862043	2018-11-22 10:43:23	2018-11-22 10:43:25	OMAR Sus cesantias en el FNA pueden ser la primera cuota de una casa para su familia. Quiere saber mas? SIN COSTO, responda SI o NO	Pendiente	2018-11-22	2018-11-22
5613575	38860532	AM	3113784913	2018-11-22 10:43:23	2018-11-22 15:18:44	BLANCA Sus cesantias en el FNA pueden ser la primera cuota de una casa. Hay subsidios disponibles, preguntelos. Quiere saber mas? SIN COSTO, responda SI o NO	NO	2018-11-22	2018-11-22	Muchas gracias por su respuesta. Un asesor del fondo Nacional del Ahorro se comunicara con usted.
5617175	73114605	AM	3145026948	2018-11-22 10:43:23	2018-11-22 10:43:25	MIGUEL Sus cesantias en el FNA pueden ser la primera cuota de una casa. En 2018 financiamos 9669 clientes como Ud. Quiere saber mas? SIN COSTO, responda SI o NO	Pendiente	2018-11-22	2018-11-22
6654578	71655193	AM	3106336046	2018-11-22 10:43:23	2018-11-22 10:43:25	Sea propietario! Sus cesantias en el FNA pueden ser la primera cuota de una casa. Quiere saber mas? SIN COSTO, responda SI o NO	Pendiente	2018-11-22	2018-11-22
6662111	71726495	AM	3163481047	2018-11-22 10:43:23	2018-11-22 10:43:25	Sus cesantias en el FNA pueden ser la primera cuota de una casa. Hay subsidios disponibles, preguntelos. Quiere saber mas? SIN COSTO, responda SI o NO	Pendiente	2018-11-22	2018-11-22
6667567	40049949	AM	3123204937	2018-11-22 10:43:23	2018-11-22 10:43:25	NANCY Sus cesantias en el FNA pueden ser la primera cuota de una casa. Hay subsidios disponibles, preguntelos. Quiere saber mas? SIN COSTO, responda SI o NO	Pendiente	2018-11-22	2018-11-22
6681094	10291139	AM	3002044177	2018-11-22 10:43:23	2018-11-22 10:43:25	Sus cesantias en el FNA pueden ser la primera cuota de una casa. Quiere saber mas? SIN COSTO, responda SI o NO	Pendiente	2018-11-22	2018-11-22
6683837	94374251	AM	3173822280	2018-11-22 10:43:23	2018-11-22 10:43:25	BAIRON Sus cesantias en el FNA pueden ser la primera cuota de una casa en CALI. Quiere saber mas? SIN COSTO, responda SI o NO	Pendiente	2018-11-22	2018-11-22
6702602	74188702	AM	3115664989	2018-11-22 10:43:23	2018-11-22 10:43:25	ALDEMAR Sus cesantias en el FNA pueden ser la primera cuota de una casa en SOGAMOSO. Quiere saber mas? SIN COSTO, responda SI o NO	Pendiente	2018-11-22	2018-11-22
6706215	18000886	AM	3105503214	2018-11-22 10:43:23	2018-11-22 10:43:25	Sus cesantias en el FNA pueden ser la primera cuota de una casa para su familia. Quiere saber mas? SIN COSTO, responda SI o NO	Pendiente	2018-11-22	2018-11-22
6717775	42731219	AM	3127035336	2018-11-22 10:43:23	2018-11-22 10:43:56	Sus cesantias en el FNA pueden ser la primera cuota de una casa para su familia. Quiere saber mas? SIN COSTO, responda SI o NO	SI	2018-11-22	2018-11-22	Muchas gracias por su respuesta. Un asesor del fondo Nacional del Ahorro se comunicara con usted.
6720279	32180585	AM	3158955888	2018-11-22 10:43:23	2018-11-22 10:46:45	LINA No deje pasar el tiempo. Sus cesantias en el FNA pueden ser la primera cuota de una casa. Quiere saber mas? SIN COSTO, responda SI o NO	SI	2018-11-22	2018-11-22	Muchas gracias por su respuesta. Un asesor del fondo Nacional del Ahorro se comunicara con usted.
6735446	71785088	AM	3207231952	2018-11-22 10:43:23	2018-11-22 10:43:25	No deje pasar el tiempo. Sus cesantias en el FNA pueden ser la primera cuota de una casa. Quiere saber mas? SIN COSTO, responda SI o NO	Pendiente	2018-11-22	2018-11-22
6739599	52719130	AM	3123787725	2018-11-22 10:43:23	2018-11-22 10:43:25	DIANA Sus cesantias en el FNA pueden ser la primera cuota de una casa. Hay subsidios disponibles, preguntelos. Quiere saber mas? SIN COSTO, responda SI o NO	Pendiente	2018-11-22	2018-11-22
6743740	16636278	AM	3183533220	2018-11-22 10:43:23	2018-11-22 10:43:25	GUILLERMO Sus cesantias en el FNA pueden ser la primera cuota de una casa. En 2018 financiamos 9669 clientes como Ud. Quiere saber mas? SIN COSTO, responda SI o NO	Pendiente	2018-11-22	2018-11-22
6743890	67016639	AM	3004452767	2018-11-22 10:43:23	2018-11-22 17:39:07	ANGELICA Sus cesantias en el FNA pueden ser la primera cuota de una casa en CALI. Quiere saber mas? SIN COSTO, responda SI o NO	SI	2018-11-22	2018-11-22	Muchas gracias por su respuesta. Un asesor del fondo Nacional del Ahorro se comunicara con usted.
6753921	44160421	AM	3013620931	2018-11-22 10:43:23	2018-11-22 10:43:25	Sea propietario! Sus cesantias en el FNA pueden ser la primera cuota de una casa. Quiere saber mas? SIN COSTO, responda SI o NO	Pendiente	2018-11-22	2018-11-22
1792273	34563885	AM	3162532735	2018-11-22 10:43:23	2018-11-22 10:43:25	Sus cesantias en el FNA pueden ser la primera cuota de una casa. En 2018 financiamos 9669 clientes como Ud. Quiere saber mas? SIN COSTO, responda SI o NO	Pendiente	2018-11-22	2018-11-22
1797235	60376981	AM	3133967335	2018-11-22 10:43:23	2018-11-22 10:43:25	Sus cesantias en el FNA pueden ser la primera cuota de una casa. Quiere saber mas? SIN COSTO, responda SI o NO	Pendiente	2018-11-22	2018-11-22
1812891	79596625	AM	3172227940	2018-11-22 10:43:23	2018-11-22 10:47:24	Sus cesantias en el FNA pueden ser la primera cuota de una casa. Quiere saber mas? SIN COSTO, responda SI o NO	SI	2018-11-22	2018-11-22	Muchas gracias por su respuesta. Un asesor del fondo Nacional del Ahorro se comunicara con usted.
1818953	3824801	AM	3205705447	2018-11-22 10:43:23	2018-11-22 10:43:25	Sea propietario! Sus cesantias en el FNA pueden ser la primera cuota de una casa. Quiere saber mas? SIN COSTO, responda SI o NO	Pendiente	2018-11-22	2018-11-22
1825592	5784708	AM	3125926302	2018-11-22 10:43:23	2018-11-22 10:43:25	Sus cesantias en el FNA pueden ser la primera cuota de una casa para su familia. Quiere saber mas? SIN COSTO, responda SI o NO	Pendiente	2018-11-22	2018-11-22
1830141	67014567	AM	3128419670	2018-11-22 10:43:23	2018-11-22 11:09:42	CAROLINA Sea propietario! Sus cesantias en el FNA pueden ser la primera cuota de una casa. Quiere saber mas? SIN COSTO, responda SI o NO	SI	2018-11-22	2018-11-22	Muchas gracias por su respuesta. Un asesor del fondo Nacional del Ahorro se comunicara con usted.
1831378	42121427	AM	3006531771	2018-11-22 10:43:23	2018-11-22 10:43:25	SANDRA Sus cesantias en el FNA pueden ser la primera cuota de una casa. En 2018 financiamos 9669 clientes como Ud. Quiere saber mas? SIN COSTO, responda SI o NO	Pendiente	2018-11-22	2018-11-22
1834060	46382797	AM	3202334370	2018-11-22 10:43:23	2018-11-22 10:46:17	MARTHA Sus cesantias en el FNA pueden ser la primera cuota de una casa. En 2018 financiamos 9669 clientes como Ud. Quiere saber mas? SIN COSTO, responda SI o NO	SI	2018-11-22	2018-11-22	Muchas gracias por su respuesta. Un asesor del fondo Nacional del Ahorro se comunicara con usted.
1843822	30405343	AM	3137307238	2018-11-22 10:43:23	2018-11-22 10:43:25	MERCEDES Sus cesantias en el FNA pueden ser la primera cuota de una casa. En 2018 financiamos 9669 clientes como Ud. Quiere saber mas? SIN COSTO, responda SI o NO	Pendiente	2018-11-22	2018-11-22
1850827	75097043	AM	3155546499	2018-11-22 10:43:23	2018-11-22 10:43:25	Sea propietario! Sus cesantias en el FNA pueden ser la primera cuota de una casa. Quiere saber mas? SIN COSTO, responda SI o NO	Pendiente	2018-11-22	2018-11-22
1877711	65729671	AM	3006333047	2018-11-22 10:43:23	2018-11-22 10:43:25	DINA No deje pasar el tiempo. Sus cesantias en el FNA pueden ser la primera cuota de una casa. Quiere saber mas? SIN COSTO, responda SI o NO	Pendiente	2018-11-22	2018-11-22
5731049	94455480	AM	3006088246	2018-11-22 10:43:23	2018-11-22 10:43:25	ALEXANDER Sea propietario! Sus cesantias en el FNA pueden ser la primera cuota de una casa. Quiere saber mas? SIN COSTO, responda SI o NO	Pendiente	2018-11-22	2018-11-22
5737363	32299172	AM	3004662651	2018-11-22 10:43:23	2018-11-22 10:43:25	Sea propietario! Sus cesantias en el FNA pueden ser la primera cuota de una casa. Quiere saber mas? SIN COSTO, responda SI o NO	Pendiente	2018-11-22	2018-11-22
5748575	38263631	AM	3112146384	2018-11-22 10:43:23	2018-11-22 10:43:25	LUZ Sus cesantias en el FNA pueden ser la primera cuota de una casa. Hay subsidios disponibles, preguntelos. Quiere saber mas? SIN COSTO, responda SI o NO	Pendiente	2018-11-22	2018-11-22
5750270	43612107	AM	3166969208	2018-11-22 10:43:23	2018-11-22 10:43:25	Sus cesantias en el FNA pueden ser la primera cuota de una casa. En 2018 financiamos 9669 clientes como Ud. Quiere saber mas? SIN COSTO, responda SI o NO	Pendiente	2018-11-22	2018-11-22
5756668	73112491	AM	3215274835	2018-11-22 10:43:23	2018-11-25 20:46:11	LUIS Sus cesantias en el FNA pueden ser la primera cuota de una casa para su familia. Quiere saber mas? SIN COSTO, responda SI o NO	SI	2018-11-22	2018-11-22	Muchas gracias por su respuesta. Un asesor del fondo Nacional del Ahorro se comunicara con usted.
5774935	72216087	AM	3013659965	2018-11-22 10:43:23	2018-11-22 10:43:25	Sus cesantias en el FNA pueden ser la primera cuota de una casa para su familia. Quiere saber mas? SIN COSTO, responda SI o NO	Pendiente	2018-11-22	2018-11-22
5800306	67028874	AM	3173953433	2018-11-22 10:43:23	2018-11-22 10:43:25	MARIA Sea propietario! Sus cesantias en el FNA pueden ser la primera cuota de una casa. Quiere saber mas? SIN COSTO, responda SI o NO	Pendiente	2018-11-22	2018-11-22
5805024	1032411199	AM	3115515951	2018-11-22 10:43:23	2018-11-22 10:43:25	Sus cesantias en el FNA pueden ser la primera cuota de una casa. En 2018 financiamos 9669 clientes como Ud. Quiere saber mas? SIN COSTO, responda SI o NO	Pendiente	2018-11-22	2018-11-22
5815927	43510686	AM	3116964425	2018-11-22 10:43:23	2018-11-22 10:43:25	Sus cesantias en el FNA pueden ser la primera cuota de una casa. Hay subsidios disponibles, preguntelos. Quiere saber mas? SIN COSTO, responda SI o NO	Pendiente	2018-11-22	2018-11-22
5819018	40369232	AM	3114157051	2018-11-22 10:43:23	2018-11-22 10:43:25	Sus cesantias en el FNA pueden ser la primera cuota de una casa para su familia. Quiere saber mas? SIN COSTO, responda SI o NO	Pendiente	2018-11-22	2018-11-22
5825862	20989237	AM	3206785869	2018-11-22 10:43:23	2018-11-22 10:43:25	PATRICIA Sus cesantias en el FNA pueden ser la primera cuota de una casa. En 2018 financiamos 9669 clientes como Ud. Quiere saber mas? SIN COSTO, responda SI o NO	Pendiente	2018-11-22	2018-11-22
5829010	30316321	AM	3146802795	2018-11-22 10:43:23	2018-11-22 10:43:25	BEATRIZ Sus cesantias en el FNA pueden ser la primera cuota de una casa. Hay subsidios disponibles, preguntelos. Quiere saber mas? SIN COSTO, responda SI o NO	Pendiente	2018-11-22	2018-11-22
5833726	1144051363	AM	3178553667	2018-11-22 10:43:23	2018-11-22 10:43:25	MONICA Sus cesantias en el FNA pueden ser la primera cuota de una casa en CALI. Quiere saber mas? SIN COSTO, responda SI o NO	Pendiente	2018-11-22	2018-11-22
5835555	63530820	AM	3124103235	2018-11-22 10:43:23	2018-11-22 10:43:25	Sea propietario! Sus cesantias en el FNA pueden ser la primera cuota de una casa. Quiere saber mas? SIN COSTO, responda SI o NO	Pendiente	2018-11-22	2018-11-22
5837900	16629300	AM	3148889010	2018-11-22 10:43:23	2018-11-22 10:43:25	Sus cesantias en el FNA pueden ser la primera cuota de una casa. Quiere saber mas? SIN COSTO, responda SI o NO	Pendiente	2018-11-22	2018-11-22
2555914	4423800	AM	3113316678	2018-11-22 10:43:23	2018-11-22 10:44:14	JON Sus cesantias en el FNA pueden ser la primera cuota de una casa. Hay subsidios disponibles, preguntelos. Quiere saber mas? SIN COSTO, responda SI o NO	SI	2018-11-22	2018-11-22	Muchas gracias por su respuesta. Un asesor del fondo Nacional del Ahorro se comunicara con usted.
2557178	65751361	AM	3208087053	2018-11-22 10:43:23	2018-11-22 10:43:25	EDNA Sus cesantias en el FNA pueden ser la primera cuota de una casa. En 2018 financiamos 9669 clientes como Ud. Quiere saber mas? SIN COSTO, responda SI o NO	Pendiente	2018-11-22	2018-11-22
2566774	71213802	AM	3007852518	2018-11-22 10:43:23	2018-11-22 10:43:25	FRANCK Sus cesantias en el FNA pueden ser la primera cuota de una casa. Hay subsidios disponibles, preguntelos. Quiere saber mas? SIN COSTO, responda SI o NO	Pendiente	2018-11-22	2018-11-22
2568718	1060237437	AM	3202621866	2018-11-22 10:43:23	2018-11-22 10:43:25	ANA Sus cesantias en el FNA pueden ser la primera cuota de una casa para su familia. Quiere saber mas? SIN COSTO, responda SI o NO	Pendiente	2018-11-22	2018-11-22
2570918	1053767273	AM	3117356388	2018-11-22 10:43:23	2018-11-22 10:43:25	OSCAR Sus cesantias en el FNA pueden ser la primera cuota de una casa. En 2018 financiamos 9669 clientes como Ud. Quiere saber mas? SIN COSTO, responda SI o NO	Pendiente	2018-11-22	2018-11-22
2580814	66841048	AM	3162550902	2018-11-22 10:43:23	2018-11-22 10:43:25	Sus cesantias en el FNA pueden ser la primera cuota de una casa. Hay subsidios disponibles, preguntelos. Quiere saber mas? SIN COSTO, responda SI o NO	Pendiente	2018-11-22	2018-11-22
2585006	49786969	AM	3106395648	2018-11-22 10:43:23	2018-11-22 10:43:25	Sus cesantias en el FNA pueden ser la primera cuota de una casa. Quiere saber mas? SIN COSTO, responda SI o NO	Pendiente	2018-11-22	2018-11-22
2590176	8487119	AM	3042435878	2018-11-22 10:43:23	2018-11-22 10:43:25	JOSE Sus cesantias en el FNA pueden ser la primera cuota de una casa en CUCUTA. Quiere saber mas? SIN COSTO, responda SI o NO	Pendiente	2018-11-22	2018-11-22
2590276	4475106	AM	3108276621	2018-11-22 10:43:23	2018-11-22 10:43:25	OSCAR No deje pasar el tiempo. Sus cesantias en el FNA pueden ser la primera cuota de una casa. Quiere saber mas? SIN COSTO, responda SI o NO	Pendiente	2018-11-22	2018-11-22
2598160	85455151	AM	3002843915	2018-11-22 10:43:23	2018-11-22 10:43:25	JESUS Sus cesantias en el FNA pueden ser la primera cuota de una casa. En 2018 financiamos 9669 clientes como Ud. Quiere saber mas? SIN COSTO, responda SI o NO	Pendiente	2018-11-22	2018-11-22
2600389	16845478	AM	3133911620	2018-11-22 10:43:23	2018-11-22 10:43:25	Sea propietario! Sus cesantias en el FNA pueden ser la primera cuota de una casa. Quiere saber mas? SIN COSTO, responda SI o NO	Pendiente	2018-11-22	2018-11-22
2617972	98380549	AM	3113117403	2018-11-22 10:43:23	2018-11-22 10:43:25	Sus cesantias en el FNA pueden ser la primera cuota de una casa. Hay subsidios disponibles, preguntelos. Quiere saber mas? SIN COSTO, responda SI o NO	Pendiente	2018-11-22	2018-11-22
2622071	32701632	AM	3183428760	2018-11-22 10:43:23	2018-11-22 10:43:25	MYRIAM Sus cesantias en el FNA pueden ser la primera cuota de una casa. Hay subsidios disponibles, preguntelos. Quiere saber mas? SIN COSTO, responda SI o NO	Pendiente	2018-11-22	2018-11-22
2625170	71639887	AM	3216397435	2018-11-22 10:43:23	2018-11-22 10:43:25	No deje pasar el tiempo. Sus cesantias en el FNA pueden ser la primera cuota de una casa. Quiere saber mas? SIN COSTO, responda SI o NO	Pendiente	2018-11-22	2018-11-22
2632005	22739882	AM	3003159587	2018-11-22 10:43:23	2018-11-22 10:43:25	Sus cesantias en el FNA pueden ser la primera cuota de una casa para su familia. Quiere saber mas? SIN COSTO, responda SI o NO	Pendiente	2018-11-22	2018-11-22
2635833	60266811	AM	3126508308	2018-11-22 10:43:23	2018-11-22 10:43:25	ANA Sus cesantias en el FNA pueden ser la primera cuota de una casa. Hay subsidios disponibles, preguntelos. Quiere saber mas? SIN COSTO, responda SI o NO	Pendiente	2018-11-22	2018-11-22
2639939	72227219	AM	3002628744	2018-11-22 10:43:23	2018-11-22 10:43:25	ARMANDO Sus cesantias en el FNA pueden ser la primera cuota de una casa en BARRANQUILLA. Quiere saber mas? SIN COSTO, responda SI o NO	Pendiente	2018-11-22	2018-11-22
5618408	27603627	AM	3142135786	2018-11-22 10:43:23	2018-11-22 10:43:25	No deje pasar el tiempo. Sus cesantias en el FNA pueden ser la primera cuota de una casa. Quiere saber mas? SIN COSTO, responda SI o NO	Pendiente	2018-11-22	2018-11-22
5622550	66941861	AM	3164912819	2018-11-22 10:43:23	2018-11-22 10:43:25	ADA Sus cesantias en el FNA pueden ser la primera cuota de una casa. En 2018 financiamos 9669 clientes como Ud. Quiere saber mas? SIN COSTO, responda SI o NO	Pendiente	2018-11-22	2018-11-22
5646837	1017163211	AM	3128822601	2018-11-22 10:43:23	2018-11-22 10:43:25	Sus cesantias en el FNA pueden ser la primera cuota de una casa. Hay subsidios disponibles, preguntelos. Quiere saber mas? SIN COSTO, responda SI o NO	Pendiente	2018-11-22	2018-11-22
5669782	85439217	AM	3135829695	2018-11-22 10:43:23	2018-11-22 10:43:25	DILFREDO Sus cesantias en el FNA pueden ser la primera cuota de una casa. En 2018 financiamos 9669 clientes como Ud. Quiere saber mas? SIN COSTO, responda SI o NO	Pendiente	2018-11-22	2018-11-22
5686318	63292925	AM	3168337727	2018-11-22 10:43:23	2018-11-22 10:43:25	NANCY No deje pasar el tiempo. Sus cesantias en el FNA pueden ser la primera cuota de una casa. Quiere saber mas? SIN COSTO, responda SI o NO	Pendiente	2018-11-22	2018-11-22
5686451	37510811	AM	3157215374	2018-11-22 10:43:23	2018-11-22 10:43:25	Sus cesantias en el FNA pueden ser la primera cuota de una casa para su familia. Quiere saber mas? SIN COSTO, responda SI o NO	Pendiente	2018-11-22	2018-11-22
5703270	36694999	AM	3107277776	2018-11-22 10:43:23	2018-11-22 10:43:25	No deje pasar el tiempo. Sus cesantias en el FNA pueden ser la primera cuota de una casa. Quiere saber mas? SIN COSTO, responda SI o NO	Pendiente	2018-11-22	2018-11-22
5707350	30330787	AM	3136646544	2018-11-22 10:43:23	2018-11-22 10:43:25	Sus cesantias en el FNA pueden ser la primera cuota de una casa. Hay subsidios disponibles, preguntelos. Quiere saber mas? SIN COSTO, responda SI o NO	Pendiente	2018-11-22	2018-11-22
5711293	45542278	AM	3206767667	2018-11-22 10:43:23	2018-11-22 10:43:25	Sea propietario! Sus cesantias en el FNA pueden ser la primera cuota de una casa. Quiere saber mas? SIN COSTO, responda SI o NO	Pendiente	2018-11-22	2018-11-22
5714451	76311776	AM	3164408110	2018-11-22 10:43:23	2018-11-22 10:43:25	Sus cesantias en el FNA pueden ser la primera cuota de una casa. Hay subsidios disponibles, preguntelos. Quiere saber mas? SIN COSTO, responda SI o NO	Pendiente	2018-11-22	2018-11-22
5726892	36309567	AM	3017486069	2018-11-22 10:43:23	2018-11-22 10:43:25	MARIA Sus cesantias en el FNA pueden ser la primera cuota de una casa en POPAYAN. Quiere saber mas? SIN COSTO, responda SI o NO	Pendiente	2018-11-22	2018-11-22
10250667	70052390	AM	3053540603	2018-11-22 10:43:23	2018-11-22 10:43:25	Sus cesantias en el FNA pueden ser la primera cuota de una casa. En 2018 financiamos 9669 clientes como Ud. Quiere saber mas? SIN COSTO, responda SI o NO	Pendiente	2018-11-22	2018-11-22
10320652	78749705	AM	3164741071	2018-11-22 10:43:23	2018-11-22 10:43:25	Sus cesantias en el FNA pueden ser la primera cuota de una casa en MONTERIA. Quiere saber mas? SIN COSTO, responda SI o NO	Pendiente	2018-11-22	2018-11-22
10325694	1143436290	AM	3015567183	2018-11-22 10:43:23	2018-11-22 10:43:25	SARAY No deje pasar el tiempo. Sus cesantias en el FNA pueden ser la primera cuota de una casa. Quiere saber mas? SIN COSTO, responda SI o NO	Pendiente	2018-11-22	2018-11-22
10337249	16738743	AM	3188641536	2018-11-22 10:43:23	2018-11-22 10:43:25	Sea propietario! Sus cesantias en el FNA pueden ser la primera cuota de una casa. Quiere saber mas? SIN COSTO, responda SI o NO	Pendiente	2018-11-22	2018-11-22
1424554	9431996	AM	3114687914	2018-11-22 10:43:23	2018-11-22 10:43:25	NESTOR No deje pasar el tiempo. Sus cesantias en el FNA pueden ser la primera cuota de una casa. Quiere saber mas? SIN COSTO, responda SI o NO	Pendiente	2018-11-22	2018-11-22
1425527	65761518	AM	3164666204	2018-11-22 10:43:23	2018-11-22 10:43:25	Sea propietario! Sus cesantias en el FNA pueden ser la primera cuota de una casa. Quiere saber mas? SIN COSTO, responda SI o NO	Pendiente	2018-11-22	2018-11-22
1446571	98668680	AM	3137382271	2018-11-22 10:43:23	2018-11-22 10:43:25	Sea propietario! Sus cesantias en el FNA pueden ser la primera cuota de una casa. Quiere saber mas? SIN COSTO, responda SI o NO	Pendiente	2018-11-22	2018-11-22
1455854	40386121	AM	3118056930	2018-11-22 10:43:23	2018-11-22 17:15:49	ESMERALDA Sea propietario! Sus cesantias en el FNA pueden ser la primera cuota de una casa. Quiere saber mas? SIN COSTO, responda SI o NO	SI	2018-11-22	2018-11-22	Muchas gracias por su respuesta. Un asesor del fondo Nacional del Ahorro se comunicara con usted.
1458365	3399818	AM	3012996651	2018-11-22 10:43:23	2018-11-22 10:43:25	Sus cesantias en el FNA pueden ser la primera cuota de una casa. Quiere saber mas? SIN COSTO, responda SI o NO	Pendiente	2018-11-22	2018-11-22
1459260	94538246	AM	3166007852	2018-11-22 10:43:23	2018-11-22 10:43:25	No deje pasar el tiempo. Sus cesantias en el FNA pueden ser la primera cuota de una casa. Quiere saber mas? SIN COSTO, responda SI o NO	Pendiente	2018-11-22	2018-11-22
1475541	25102344	AM	3103912974	2018-11-22 10:43:23	2018-11-22 10:43:25	Sus cesantias en el FNA pueden ser la primera cuota de una casa para su familia. Quiere saber mas? SIN COSTO, responda SI o NO	Pendiente	2018-11-22	2018-11-22
1480822	94502598	AM	3173673377	2018-11-22 10:43:23	2018-11-22 10:43:25	Sus cesantias en el FNA pueden ser la primera cuota de una casa. Hay subsidios disponibles, preguntelos. Quiere saber mas? SIN COSTO, responda SI o NO	Pendiente	2018-11-22	2018-11-22
1483960	74324136	AM	3002091965	2018-11-22 10:43:23	2018-11-22 10:43:25	Sus cesantias en el FNA pueden ser la primera cuota de una casa. En 2018 financiamos 9669 clientes como Ud. Quiere saber mas? SIN COSTO, responda SI o NO	Pendiente	2018-11-22	2018-11-22
1487480	36301469	AM	3173744909	2018-11-22 10:43:23	2018-11-22 10:43:25	No deje pasar el tiempo. Sus cesantias en el FNA pueden ser la primera cuota de una casa. Quiere saber mas? SIN COSTO, responda SI o NO	Pendiente	2018-11-22	2018-11-22
1488768	91489834	AM	3165792751	2018-11-22 10:43:23	2018-11-22 10:43:25	HERMES No deje pasar el tiempo. Sus cesantias en el FNA pueden ser la primera cuota de una casa. Quiere saber mas? SIN COSTO, responda SI o NO	Pendiente	2018-11-22	2018-11-22
1505297	88208375	AM	3158277856	2018-11-22 10:43:23	2018-11-22 10:43:25	JHON Sus cesantias en el FNA pueden ser la primera cuota de una casa. En 2018 financiamos 9669 clientes como Ud. Quiere saber mas? SIN COSTO, responda SI o NO	Pendiente	2018-11-22	2018-11-22
667919	46663011	AM	3124625583	2018-11-22 10:43:23	2018-11-22 12:33:41	HERCILIA Sea propietario! Sus cesantias en el FNA pueden ser la primera cuota de una casa. Quiere saber mas? SIN COSTO, responda SI o NO	SI	2018-11-22	2018-11-22	Muchas gracias por su respuesta. Un asesor del fondo Nacional del Ahorro se comunicara con usted.
668280	25281303	AM	3147992738	2018-11-22 10:43:23	2018-11-22 10:43:25	Sus cesantias en el FNA pueden ser la primera cuota de una casa en POPAYAN. Quiere saber mas? SIN COSTO, responda SI o NO	Pendiente	2018-11-22	2018-11-22
668986	23350049	AM	3133785078	2018-11-22 10:43:23	2018-11-22 10:43:25	Sus cesantias en el FNA pueden ser la primera cuota de una casa para su familia. Quiere saber mas? SIN COSTO, responda SI o NO	Pendiente	2018-11-22	2018-11-22
669263	14325425	AM	3132923939	2018-11-22 10:43:23	2018-11-22 10:43:25	Sus cesantias en el FNA pueden ser la primera cuota de una casa. Quiere saber mas? SIN COSTO, responda SI o NO	Pendiente	2018-11-22	2018-11-22
669908	30726185	AM	3137033074	2018-11-22 10:43:23	2018-11-22 10:43:25	Sus cesantias en el FNA pueden ser la primera cuota de una casa para su familia. Quiere saber mas? SIN COSTO, responda SI o NO	Pendiente	2018-11-22	2018-11-22
670799	33142359	AM	3166957725	2018-11-22 10:43:23	2018-11-22 10:43:25	Sea propietario! Sus cesantias en el FNA pueden ser la primera cuota de una casa. Quiere saber mas? SIN COSTO, responda SI o NO	Pendiente	2018-11-22	2018-11-22
671219	63286165	AM	3124439907	2018-11-22 10:43:23	2018-11-22 10:43:25	Sea propietario! Sus cesantias en el FNA pueden ser la primera cuota de una casa. Quiere saber mas? SIN COSTO, responda SI o NO	Pendiente	2018-11-22	2018-11-22
671779	30720034	AM	3136755612	2018-11-22 10:43:23	2018-11-22 10:43:25	ROCIO Sus cesantias en el FNA pueden ser la primera cuota de una casa. Hay subsidios disponibles, preguntelos. Quiere saber mas? SIN COSTO, responda SI o NO	Pendiente	2018-11-22	2018-11-22
673057	45509793	AM	3008044700	2018-11-22 10:43:23	2018-11-22 10:43:25	ADELAIDA Sus cesantias en el FNA pueden ser la primera cuota de una casa para su familia. Quiere saber mas? SIN COSTO, responda SI o NO	Pendiente	2018-11-22	2018-11-22
674217	31576756	AM	3004573332	2018-11-22 10:43:23	2018-11-22 10:43:25	PAOLA Sus cesantias en el FNA pueden ser la primera cuota de una casa. En 2018 financiamos 9669 clientes como Ud. Quiere saber mas? SIN COSTO, responda SI o NO	Pendiente	2018-11-22	2018-11-22
677272	16611542	AM	3155534483	2018-11-22 10:43:23	2018-11-22 10:43:25	ANDRES Sus cesantias en el FNA pueden ser la primera cuota de una casa. En 2018 financiamos 9669 clientes como Ud. Quiere saber mas? SIN COSTO, responda SI o NO	Pendiente	2018-11-22	2018-11-22
678783	79321288	AM	3165714992	2018-11-22 10:43:23	2018-11-22 10:43:25	No deje pasar el tiempo. Sus cesantias en el FNA pueden ser la primera cuota de una casa. Quiere saber mas? SIN COSTO, responda SI o NO	Pendiente	2018-11-22	2018-11-22
680882	22581745	AM	3114400303	2018-11-22 10:43:23	2018-11-22 10:43:25	GEOVANA Sus cesantias en el FNA pueden ser la primera cuota de una casa. Hay subsidios disponibles, preguntelos. Quiere saber mas? SIN COSTO, responda SI o NO	Pendiente	2018-11-22	2018-11-22
681445	94415574	AM	3128430480	2018-11-22 10:43:23	2018-11-22 10:43:25	ERNESTO Sea propietario! Sus cesantias en el FNA pueden ser la primera cuota de una casa. Quiere saber mas? SIN COSTO, responda SI o NO	Pendiente	2018-11-22	2018-11-22
682077	12435596	AM	3165265281	2018-11-22 10:43:23	2018-11-22 10:43:25	Sus cesantias en el FNA pueden ser la primera cuota de una casa. Hay subsidios disponibles, preguntelos. Quiere saber mas? SIN COSTO, responda SI o NO	Pendiente	2018-11-22	2018-11-22
687096	30740499	AM	3127840646	2018-11-22 10:43:23	2018-11-22 10:43:25	Sus cesantias en el FNA pueden ser la primera cuota de una casa para su familia. Quiere saber mas? SIN COSTO, responda SI o NO	Pendiente	2018-11-22	2018-11-22
687490	10013023	AM	3005178914	2018-11-22 10:43:23	2018-11-22 10:43:25	Sus cesantias en el FNA pueden ser la primera cuota de una casa. En 2018 financiamos 9669 clientes como Ud. Quiere saber mas? SIN COSTO, responda SI o NO	Pendiente	2018-11-22	2018-11-22
688388	14231547	AM	3102820275	2018-11-22 10:43:23	2018-11-22 10:43:25	Sus cesantias en el FNA pueden ser la primera cuota de una casa. En 2018 financiamos 9669 clientes como Ud. Quiere saber mas? SIN COSTO, responda SI o NO	Pendiente	2018-11-22	2018-11-22
692468	94279049	AM	3206830910	2018-11-22 10:43:23	2018-11-22 10:43:25	EDILBERTO Sus cesantias en el FNA pueden ser la primera cuota de una casa. Hay subsidios disponibles, preguntelos. Quiere saber mas? SIN COSTO, responda SI o NO	Pendiente	2018-11-22	2018-11-22
697315	51866627	AM	3108150746	2018-11-22 10:43:23	2018-11-22 10:43:25	Sus cesantias en el FNA pueden ser la primera cuota de una casa. Hay subsidios disponibles, preguntelos. Quiere saber mas? SIN COSTO, responda SI o NO	Pendiente	2018-11-22	2018-11-22
698438	71698643	AM	3143577707	2018-11-22 10:43:23	2018-11-22 10:43:25	WILLIAM No deje pasar el tiempo. Sus cesantias en el FNA pueden ser la primera cuota de una casa. Quiere saber mas? SIN COSTO, responda SI o NO	Pendiente	2018-11-22	2018-11-22
700445	10224612	AM	3145363035	2018-11-22 10:43:23	2018-11-22 10:43:25	No deje pasar el tiempo. Sus cesantias en el FNA pueden ser la primera cuota de una casa. Quiere saber mas? SIN COSTO, responda SI o NO	Pendiente	2018-11-22	2018-11-22
701308	10237275	AM	3154174931	2018-11-22 10:43:23	2018-11-22 10:43:25	Sus cesantias en el FNA pueden ser la primera cuota de una casa. En 2018 financiamos 9669 clientes como Ud. Quiere saber mas? SIN COSTO, responda SI o NO	Pendiente	2018-11-22	2018-11-22
701694	39711770	AM	3116655863	2018-11-22 10:43:23	2018-11-22 10:43:25	MARIA Sus cesantias en el FNA pueden ser la primera cuota de una casa para su familia. Quiere saber mas? SIN COSTO, responda SI o NO	Pendiente	2018-11-22	2018-11-22
703315	25682672	AM	3103964465	2018-11-22 10:43:23	2018-11-22 11:40:46	LILIANA Sus cesantias en el FNA pueden ser la primera cuota de una casa. Hay subsidios disponibles, preguntelos. Quiere saber mas? SIN COSTO, responda SI o NO	SI	2018-11-22	2018-11-22	Muchas gracias por su respuesta. Un asesor del fondo Nacional del Ahorro se comunicara con usted.
705846	36718392	AM	3012539507	2018-11-22 10:43:23	2018-11-22 10:43:25	Sus cesantias en el FNA pueden ser la primera cuota de una casa. En 2018 financiamos 9669 clientes como Ud. Quiere saber mas? SIN COSTO, responda SI o NO	Pendiente	2018-11-22	2018-11-22
706390	6771843	AM	3124470780	2018-11-22 10:43:23	2018-11-22 10:43:25	DIEGO Sus cesantias en el FNA pueden ser la primera cuota de una casa. Hay subsidios disponibles, preguntelos. Quiere saber mas? SIN COSTO, responda SI o NO	Pendiente	2018-11-22	2018-11-22
706645	70562869	AM	3113476839	2018-11-22 10:43:23	2018-11-22 10:43:25	ALVARO No deje pasar el tiempo. Sus cesantias en el FNA pueden ser la primera cuota de una casa. Quiere saber mas? SIN COSTO, responda SI o NO	Pendiente	2018-11-22	2018-11-22
707110	60310159	AM	3208558838	2018-11-22 10:43:23	2018-11-22 10:43:25	CLAUDIA Sea propietario! Sus cesantias en el FNA pueden ser la primera cuota de una casa. Quiere saber mas? SIN COSTO, responda SI o NO	Pendiente	2018-11-22	2018-11-22
707765	13511299	AM	3183740698	2018-11-22 10:43:23	2018-11-22 10:50:03	Sus cesantias en el FNA pueden ser la primera cuota de una casa. Quiere saber mas? SIN COSTO, responda SI o NO	SI	2018-11-22	2018-11-22	Muchas gracias por su respuesta. Un asesor del fondo Nacional del Ahorro se comunicara con usted.
708164	63278300	AM	3102761285	2018-11-22 10:43:23	2018-11-22 10:43:25	Sus cesantias en el FNA pueden ser la primera cuota de una casa en BUCARAMANGA. Quiere saber mas? SIN COSTO, responda SI o NO	Pendiente	2018-11-22	2018-11-22
708453	51665915	AM	3165245138	2018-11-22 10:43:23	2018-11-22 10:43:25	Sus cesantias en el FNA pueden ser la primera cuota de una casa. En 2018 financiamos 9669 clientes como Ud. Quiere saber mas? SIN COSTO, responda SI o NO	Pendiente	2018-11-22	2018-11-22
709834	93379782	AM	3213075759	2018-11-22 10:43:23	2018-11-22 10:43:25	AUGUSTO Sus cesantias en el FNA pueden ser la primera cuota de una casa. En 2018 financiamos 9669 clientes como Ud. Quiere saber mas? SIN COSTO, responda SI o NO	Pendiente	2018-11-22	2018-11-22
710767	32473315	AM	3104993993	2018-11-22 10:43:23	2018-11-22 10:43:25	Sea propietario! Sus cesantias en el FNA pueden ser la primera cuota de una casa. Quiere saber mas? SIN COSTO, responda SI o NO	Pendiente	2018-11-22	2018-11-22
711324	51990770	AM	3108822746	2018-11-22 10:43:23	2018-11-22 10:43:25	LUZ Sus cesantias en el FNA pueden ser la primera cuota de una casa para su familia. Quiere saber mas? SIN COSTO, responda SI o NO	Pendiente	2018-11-22	2018-11-22
712189	7697780	AM	3002170272	2018-11-22 10:43:23	2018-11-22 10:43:25	GABRIEL Sus cesantias en el FNA pueden ser la primera cuota de una casa para su familia. Quiere saber mas? SIN COSTO, responda SI o NO	Pendiente	2018-11-22	2018-11-22
713061	10289618	AM	3206429359	2018-11-22 10:43:23	2018-11-22 10:43:25	No deje pasar el tiempo. Sus cesantias en el FNA pueden ser la primera cuota de una casa. Quiere saber mas? SIN COSTO, responda SI o NO	Pendiente	2018-11-22	2018-11-22
713908	34604566	AM	3006536152	2018-11-22 10:43:23	2018-11-22 10:43:25	CLAUDIA Sus cesantias en el FNA pueden ser la primera cuota de una casa. En 2018 financiamos 9669 clientes como Ud. Quiere saber mas? SIN COSTO, responda SI o NO	Pendiente	2018-11-22	2018-11-22
715789	59824699	AM	3014473061	2018-11-22 10:43:23	2018-11-22 10:43:25	Sus cesantias en el FNA pueden ser la primera cuota de una casa en PASTO. Quiere saber mas? SIN COSTO, responda SI o NO	Pendiente	2018-11-22	2018-11-22
716690	52839408	AM	3182881010	2018-11-22 10:43:23	2018-11-22 10:43:25	AMPARO Sus cesantias en el FNA pueden ser la primera cuota de una casa. Hay subsidios disponibles, preguntelos. Quiere saber mas? SIN COSTO, responda SI o NO	Pendiente	2018-11-22	2018-11-22
717980	37895242	AM	3138158853	2018-11-22 10:43:23	2018-11-22 10:43:25	Sus cesantias en el FNA pueden ser la primera cuota de una casa para su familia. Quiere saber mas? SIN COSTO, responda SI o NO	Pendiente	2018-11-22	2018-11-22
719014	24099648	AM	3216598754	2018-11-22 10:43:23	2018-11-22 10:43:25	MARIA Sea propietario! Sus cesantias en el FNA pueden ser la primera cuota de una casa. Quiere saber mas? SIN COSTO, responda SI o NO	Pendiente	2018-11-22	2018-11-22
719244	73125898	AM	3148906067	2018-11-22 10:43:23	2018-11-22 10:43:25	Sus cesantias en el FNA pueden ser la primera cuota de una casa en CARTAGENA. Quiere saber mas? SIN COSTO, responda SI o NO	Pendiente	2018-11-22	2018-11-22
719316	34572470	AM	3206566595	2018-11-22 10:43:23	2018-11-22 10:43:25	MARIA Sus cesantias en el FNA pueden ser la primera cuota de una casa. Hay subsidios disponibles, preguntelos. Quiere saber mas? SIN COSTO, responda SI o NO	Pendiente	2018-11-22	2018-11-22
721246	12908587	AM	3176668276	2018-11-22 10:43:23	2018-11-22 10:43:25	Sus cesantias en el FNA pueden ser la primera cuota de una casa. Quiere saber mas? SIN COSTO, responda SI o NO	Pendiente	2018-11-22	2018-11-22
721534	6246697	AM	3116057687	2018-11-22 10:43:23	2018-11-22 11:45:27	JOHN Sus cesantias en el FNA pueden ser la primera cuota de una casa. Hay subsidios disponibles, preguntelos. Quiere saber mas? SIN COSTO, responda SI o NO	SI	2018-11-22	2018-11-22	Muchas gracias por su respuesta. Un asesor del fondo Nacional del Ahorro se comunicara con usted.
721860	40215678	AM	3133314413	2018-11-22 10:43:23	2018-11-22 10:43:25	CELIA Sus cesantias en el FNA pueden ser la primera cuota de una casa. Hay subsidios disponibles, preguntelos. Quiere saber mas? SIN COSTO, responda SI o NO	Pendiente	2018-11-22	2018-11-22
723601	40365888	AM	3112812600	2018-11-22 10:43:23	2018-11-22 10:43:25	DORIS No deje pasar el tiempo. Sus cesantias en el FNA pueden ser la primera cuota de una casa. Quiere saber mas? SIN COSTO, responda SI o NO	Pendiente	2018-11-22	2018-11-22
724845	33337859	AM	3135687241	2018-11-22 10:43:23	2018-11-22 10:43:25	Sus cesantias en el FNA pueden ser la primera cuota de una casa en CARTAGENA. Quiere saber mas? SIN COSTO, responda SI o NO	Pendiente	2018-11-22	2018-11-22
726470	6763416	AM	3112333461	2018-11-22 10:43:23	2018-11-22 10:43:25	ORLANDO Sus cesantias en el FNA pueden ser la primera cuota de una casa en TUNJA. Quiere saber mas? SIN COSTO, responda SI o NO	Pendiente	2018-11-22	2018-11-22
727419	6886283	AM	3006099606	2018-11-22 10:43:23	2018-11-22 10:43:25	JULIO No deje pasar el tiempo. Sus cesantias en el FNA pueden ser la primera cuota de una casa. Quiere saber mas? SIN COSTO, responda SI o NO	Pendiente	2018-11-22	2018-11-22
727511	16686650	AM	3155577347	2018-11-22 10:43:23	2018-11-22 10:43:25	JEAN Sus cesantias en el FNA pueden ser la primera cuota de una casa. Hay subsidios disponibles, preguntelos. Quiere saber mas? SIN COSTO, responda SI o NO	Pendiente	2018-11-22	2018-11-22
727573	23429629	AM	3103260670	2018-11-22 10:43:23	2018-11-22 10:43:25	Sus cesantias en el FNA pueden ser la primera cuota de una casa. En 2018 financiamos 9669 clientes como Ud. Quiere saber mas? SIN COSTO, responda SI o NO	Pendiente	2018-11-22	2018-11-22
727675	42885685	AM	3113869092	2018-11-22 10:43:23	2018-11-22 10:43:25	Sus cesantias en el FNA pueden ser la primera cuota de una casa. En 2018 financiamos 9669 clientes como Ud. Quiere saber mas? SIN COSTO, responda SI o NO	Pendiente	2018-11-22	2018-11-22
727909	30741008	AM	3122495058	2018-11-22 10:43:23	2018-11-22 10:43:25	Sus cesantias en el FNA pueden ser la primera cuota de una casa en PASTO. Quiere saber mas? SIN COSTO, responda SI o NO	Pendiente	2018-11-22	2018-11-22
728431	24742015	AM	3113333625	2018-11-22 10:43:23	2018-11-22 10:43:25	No deje pasar el tiempo. Sus cesantias en el FNA pueden ser la primera cuota de una casa. Quiere saber mas? SIN COSTO, responda SI o NO	Pendiente	2018-11-22	2018-11-22
728512	12992083	AM	3166343905	2018-11-22 10:43:23	2018-11-22 10:43:25	Sus cesantias en el FNA pueden ser la primera cuota de una casa en PASTO. Quiere saber mas? SIN COSTO, responda SI o NO	Pendiente	2018-11-22	2018-11-22
728888	30319633	AM	3148218240	2018-11-22 10:43:23	2018-11-22 10:43:25	ELIANA Sus cesantias en el FNA pueden ser la primera cuota de una casa en PEREIRA. Quiere saber mas? SIN COSTO, responda SI o NO	Pendiente	2018-11-22	2018-11-22
1627069	65764050	AM	3186295903	2018-11-22 10:43:23	2018-11-22 10:43:25	CAROL Sus cesantias en el FNA pueden ser la primera cuota de una casa para su familia. Quiere saber mas? SIN COSTO, responda SI o NO	Pendiente	2018-11-22	2018-11-22
1627918	7710283	AM	3144179263	2018-11-22 10:43:23	2018-11-22 10:43:25	No deje pasar el tiempo. Sus cesantias en el FNA pueden ser la primera cuota de una casa. Quiere saber mas? SIN COSTO, responda SI o NO	Pendiente	2018-11-22	2018-11-22
1636709	37726931	AM	3173167099	2018-11-22 10:43:23	2018-11-22 10:43:25	LUZ No deje pasar el tiempo. Sus cesantias en el FNA pueden ser la primera cuota de una casa. Quiere saber mas? SIN COSTO, responda SI o NO	Pendiente	2018-11-22	2018-11-22
1642310	36305498	AM	3138321971	2018-11-22 10:43:23	2018-11-22 10:43:25	Sus cesantias en el FNA pueden ser la primera cuota de una casa para su familia. Quiere saber mas? SIN COSTO, responda SI o NO	Pendiente	2018-11-22	2018-11-22
1652240	7700503	AM	3152229960	2018-11-22 10:43:23	2018-11-22 10:43:25	ANDRES Sus cesantias en el FNA pueden ser la primera cuota de una casa en NEIVA. Quiere saber mas? SIN COSTO, responda SI o NO	Pendiente	2018-11-22	2018-11-22
1662581	34556831	AM	3127845487	2018-11-22 10:43:23	2018-11-22 10:43:25	Sus cesantias en el FNA pueden ser la primera cuota de una casa. Hay subsidios disponibles, preguntelos. Quiere saber mas? SIN COSTO, responda SI o NO	Pendiente	2018-11-22	2018-11-22
1675668	36750205	AM	3186007973	2018-11-22 10:43:23	2018-11-22 10:44:13	Sus cesantias en el FNA pueden ser la primera cuota de una casa. Hay subsidios disponibles, preguntelos. Quiere saber mas? SIN COSTO, responda SI o NO	SI	2018-11-22	2018-11-22	Muchas gracias por su respuesta. Un asesor del fondo Nacional del Ahorro se comunicara con usted.
1678329	17311760	AM	3118472937	2018-11-22 10:43:23	2018-11-22 10:43:25	EDGAR Sus cesantias en el FNA pueden ser la primera cuota de una casa. Hay subsidios disponibles, preguntelos. Quiere saber mas? SIN COSTO, responda SI o NO	Pendiente	2018-11-22	2018-11-22
1681226	13069977	AM	3163229205	2018-11-22 10:43:23	2018-11-22 10:43:25	CARLOS Sus cesantias en el FNA pueden ser la primera cuota de una casa. Hay subsidios disponibles, preguntelos. Quiere saber mas? SIN COSTO, responda SI o NO	Pendiente	2018-11-22	2018-11-22
1682417	63313731	AM	3174345458	2018-11-22 10:43:23	2018-11-22 10:43:25	VILMA Sea propietario! Sus cesantias en el FNA pueden ser la primera cuota de una casa. Quiere saber mas? SIN COSTO, responda SI o NO	Pendiente	2018-11-22	2018-11-22
1687973	86057067	AM	3144696388	2018-11-22 10:43:23	2018-11-22 10:43:25	HECTOR Sea propietario! Sus cesantias en el FNA pueden ser la primera cuota de una casa. Quiere saber mas? SIN COSTO, responda SI o NO	Pendiente	2018-11-22	2018-11-22
5140655	43191144	AM	3216076193	2018-11-22 10:43:23	2018-11-22 10:43:25	Sus cesantias en el FNA pueden ser la primera cuota de una casa para su familia. Quiere saber mas? SIN COSTO, responda SI o NO	Pendiente	2018-11-22	2018-11-22
5146001	93372791	AM	3153100974	2018-11-22 10:43:23	2018-11-22 19:32:08	No deje pasar el tiempo. Sus cesantias en el FNA pueden ser la primera cuota de una casa. Quiere saber mas? SIN COSTO, responda SI o NO	SI	2018-11-22	2018-11-22	Muchas gracias por su respuesta. Un asesor del fondo Nacional del Ahorro se comunicara con usted.
5149819	1017187181	AM	3014443730	2018-11-22 10:43:23	2018-11-22 10:43:25	VANESSA Sea propietario! Sus cesantias en el FNA pueden ser la primera cuota de una casa. Quiere saber mas? SIN COSTO, responda SI o NO	Pendiente	2018-11-22	2018-11-22
5157454	25274930	AM	3218838357	2018-11-22 10:43:23	2018-11-22 10:43:25	DANY Sus cesantias en el FNA pueden ser la primera cuota de una casa. En 2018 financiamos 9669 clientes como Ud. Quiere saber mas? SIN COSTO, responda SI o NO	Pendiente	2018-11-22	2018-11-22
5159373	1020425376	AM	3216258895	2018-11-22 10:43:23	2018-11-22 10:43:25	NATALIA Sus cesantias en el FNA pueden ser la primera cuota de una casa en MEDELLIN. Quiere saber mas? SIN COSTO, responda SI o NO	Pendiente	2018-11-22	2018-11-22
5159636	5208722	AM	3165282854	2018-11-22 10:43:23	2018-11-22 10:43:25	Sus cesantias en el FNA pueden ser la primera cuota de una casa. Hay subsidios disponibles, preguntelos. Quiere saber mas? SIN COSTO, responda SI o NO	Pendiente	2018-11-22	2018-11-22
5160186	1047425312	AM	3002154584	2018-11-22 10:43:23	2018-11-22 10:43:25	No deje pasar el tiempo. Sus cesantias en el FNA pueden ser la primera cuota de una casa. Quiere saber mas? SIN COSTO, responda SI o NO	Pendiente	2018-11-22	2018-11-22
5162004	5820633	AM	3176744174	2018-11-22 10:43:23	2018-11-22 10:43:25	Sus cesantias en el FNA pueden ser la primera cuota de una casa. En 2018 financiamos 9669 clientes como Ud. Quiere saber mas? SIN COSTO, responda SI o NO	Pendiente	2018-11-22	2018-11-22
5165316	25281627	AM	3014787322	2018-11-22 10:43:23	2018-11-22 10:43:25	PAOLA Sus cesantias en el FNA pueden ser la primera cuota de una casa en POPAYAN. Quiere saber mas? SIN COSTO, responda SI o NO	Pendiente	2018-11-22	2018-11-22
5168380	93374316	AM	3174372322	2018-11-22 10:43:23	2018-11-22 10:43:25	Sus cesantias en el FNA pueden ser la primera cuota de una casa. Quiere saber mas? SIN COSTO, responda SI o NO	Pendiente	2018-11-22	2018-11-22
5172292	66827797	AM	3159273626	2018-11-22 10:43:23	2018-11-22 10:43:25	DIANA Sea propietario! Sus cesantias en el FNA pueden ser la primera cuota de una casa. Quiere saber mas? SIN COSTO, responda SI o NO	Pendiente	2018-11-22	2018-11-22
5186565	79737988	AM	3117500321	2018-11-22 10:43:23	2018-11-22 10:44:02	Sea propietario! Sus cesantias en el FNA pueden ser la primera cuota de una casa. Quiere saber mas? SIN COSTO, responda SI o NO	SI	2018-11-22	2018-11-22	Muchas gracias por su respuesta. Un asesor del fondo Nacional del Ahorro se comunicara con usted.
5190137	98562908	AM	3002804606	2018-11-22 10:43:23	2018-11-22 10:43:25	JORGE Sus cesantias en el FNA pueden ser la primera cuota de una casa para su familia. Quiere saber mas? SIN COSTO, responda SI o NO	Pendiente	2018-11-22	2018-11-22
5195393	71365060	AM	3116600190	2018-11-22 10:43:23	2018-11-22 10:43:25	BRUNO Sus cesantias en el FNA pueden ser la primera cuota de una casa. En 2018 financiamos 9669 clientes como Ud. Quiere saber mas? SIN COSTO, responda SI o NO	Pendiente	2018-11-22	2018-11-22
5199110	34566681	AM	3218160780	2018-11-22 10:43:23	2018-11-22 10:43:25	Sea propietario! Sus cesantias en el FNA pueden ser la primera cuota de una casa. Quiere saber mas? SIN COSTO, responda SI o NO	Pendiente	2018-11-22	2018-11-22
5207210	14232468	AM	3007060541	2018-11-22 10:43:23	2018-11-22 10:43:25	Sus cesantias en el FNA pueden ser la primera cuota de una casa. En 2018 financiamos 9669 clientes como Ud. Quiere saber mas? SIN COSTO, responda SI o NO	Pendiente	2018-11-22	2018-11-22
5211494	91475939	AM	3162240153	2018-11-22 10:43:23	2018-11-22 10:43:25	Sus cesantias en el FNA pueden ser la primera cuota de una casa. Hay subsidios disponibles, preguntelos. Quiere saber mas? SIN COSTO, responda SI o NO	Pendiente	2018-11-22	2018-11-22
5211971	40022822	AM	3118801084	2018-11-22 10:43:23	2018-11-22 10:43:25	Sus cesantias en el FNA pueden ser la primera cuota de una casa. Quiere saber mas? SIN COSTO, responda SI o NO	Pendiente	2018-11-22	2018-11-22
4403432	12188474	AM	3124817910	2018-11-22 10:43:23	2018-11-22 10:43:25	No deje pasar el tiempo. Sus cesantias en el FNA pueden ser la primera cuota de una casa. Quiere saber mas? SIN COSTO, responda SI o NO	Pendiente	2018-11-22	2018-11-22
4405598	28551615	AM	3208000742	2018-11-22 10:43:23	2018-11-22 10:43:25	Sea propietario! Sus cesantias en el FNA pueden ser la primera cuota de una casa. Quiere saber mas? SIN COSTO, responda SI o NO	Pendiente	2018-11-22	2018-11-22
4411605	1128266516	AM	3004634922	2018-11-22 10:43:23	2018-11-22 10:43:25	Sus cesantias en el FNA pueden ser la primera cuota de una casa. Hay subsidios disponibles, preguntelos. Quiere saber mas? SIN COSTO, responda SI o NO	Pendiente	2018-11-22	2018-11-22
4413655	39171983	AM	3117173298	2018-11-22 10:43:23	2018-11-22 10:43:25	Sus cesantias en el FNA pueden ser la primera cuota de una casa para su familia. Quiere saber mas? SIN COSTO, responda SI o NO	Pendiente	2018-11-22	2018-11-22
4414714	15400400	AM	3008012896	2018-11-22 10:43:23	2018-11-22 10:43:25	EDGAR Sus cesantias en el FNA pueden ser la primera cuota de una casa. Hay subsidios disponibles, preguntelos. Quiere saber mas? SIN COSTO, responda SI o NO	Pendiente	2018-11-22	2018-11-22
4414796	43907265	AM	3147583892	2018-11-22 10:43:23	2018-11-22 10:43:25	No deje pasar el tiempo. Sus cesantias en el FNA pueden ser la primera cuota de una casa. Quiere saber mas? SIN COSTO, responda SI o NO	Pendiente	2018-11-22	2018-11-22
4416420	34331765	AM	3104054752	2018-11-22 10:43:23	2018-11-22 10:43:25	No deje pasar el tiempo. Sus cesantias en el FNA pueden ser la primera cuota de una casa. Quiere saber mas? SIN COSTO, responda SI o NO	Pendiente	2018-11-22	2018-11-22
4417299	24576907	AM	3154023628	2018-11-22 10:43:23	2018-11-22 10:43:25	MARTHA No deje pasar el tiempo. Sus cesantias en el FNA pueden ser la primera cuota de una casa. Quiere saber mas? SIN COSTO, responda SI o NO	Pendiente	2018-11-22	2018-11-22
4425497	42780431	AM	3122081785	2018-11-22 10:43:23	2018-11-22 10:43:25	EUCARIS Sus cesantias en el FNA pueden ser la primera cuota de una casa para su familia. Quiere saber mas? SIN COSTO, responda SI o NO	Pendiente	2018-11-22	2018-11-22
4427198	71710267	AM	3128818930	2018-11-22 10:43:23	2018-11-22 10:43:25	Sus cesantias en el FNA pueden ser la primera cuota de una casa en MEDELLIN. Quiere saber mas? SIN COSTO, responda SI o NO	Pendiente	2018-11-22	2018-11-22
4431292	98534517	AM	3217116963	2018-11-22 10:43:23	2018-11-22 10:43:25	Sus cesantias en el FNA pueden ser la primera cuota de una casa para su familia. Quiere saber mas? SIN COSTO, responda SI o NO	Pendiente	2018-11-22	2018-11-22
4436693	45507941	AM	3107097520	2018-11-22 10:43:23	2018-11-22 10:43:25	XEOMARA Sus cesantias en el FNA pueden ser la primera cuota de una casa. En 2018 financiamos 9669 clientes como Ud. Quiere saber mas? SIN COSTO, responda SI o NO	Pendiente	2018-11-22	2018-11-22
4438898	72270668	AM	3015641116	2018-11-22 10:43:23	2018-11-22 10:43:25	JAIRO Sus cesantias en el FNA pueden ser la primera cuota de una casa. Hay subsidios disponibles, preguntelos. Quiere saber mas? SIN COSTO, responda SI o NO	Pendiente	2018-11-22	2018-11-22
4440855	1061720562	AM	3173595562	2018-11-22 10:43:23	2018-11-22 10:43:25	FRANCISCO Sus cesantias en el FNA pueden ser la primera cuota de una casa en POPAYAN. Quiere saber mas? SIN COSTO, responda SI o NO	Pendiente	2018-11-22	2018-11-22
4441516	30396988	AM	3137067447	2018-11-22 10:43:23	2018-11-22 10:43:25	Sus cesantias en el FNA pueden ser la primera cuota de una casa. Quiere saber mas? SIN COSTO, responda SI o NO	Pendiente	2018-11-22	2018-11-22
4442850	1020422679	AM	3195701973	2018-11-22 10:43:23	2018-11-22 10:43:25	Sus cesantias en el FNA pueden ser la primera cuota de una casa. Quiere saber mas? SIN COSTO, responda SI o NO	Pendiente	2018-11-22	2018-11-22
4445186	10281324	AM	3113970252	2018-11-22 10:43:23	2018-11-22 10:43:25	No deje pasar el tiempo. Sus cesantias en el FNA pueden ser la primera cuota de una casa. Quiere saber mas? SIN COSTO, responda SI o NO	Pendiente	2018-11-22	2018-11-22
4447589	55313283	AM	3116781078	2018-11-22 10:43:23	2018-11-22 10:43:25	SANDRA No deje pasar el tiempo. Sus cesantias en el FNA pueden ser la primera cuota de una casa. Quiere saber mas? SIN COSTO, responda SI o NO	Pendiente	2018-11-22	2018-11-22
4452693	42160117	AM	3128870219	2018-11-22 10:43:23	2018-11-22 10:43:25	Sus cesantias en el FNA pueden ser la primera cuota de una casa. Hay subsidios disponibles, preguntelos. Quiere saber mas? SIN COSTO, responda SI o NO	Pendiente	2018-11-22	2018-11-22
4457530	34569185	AM	3007731651	2018-11-22 10:43:23	2018-11-22 10:43:26	Sus cesantias en el FNA pueden ser la primera cuota de una casa en CALI. Quiere saber mas? SIN COSTO, responda SI o NO	Pendiente	2018-11-22	2018-11-22
4458129	30315292	AM	3127014959	2018-11-22 10:43:23	2018-11-22 10:43:26	Sea propietario! Sus cesantias en el FNA pueden ser la primera cuota de una casa. Quiere saber mas? SIN COSTO, responda SI o NO	Pendiente	2018-11-22	2018-11-22
4458473	97472905	AM	3206749823	2018-11-22 10:43:23	2018-11-22 10:43:26	No deje pasar el tiempo. Sus cesantias en el FNA pueden ser la primera cuota de una casa. Quiere saber mas? SIN COSTO, responda SI o NO	Pendiente	2018-11-22	2018-11-22
4462633	73431920	AM	3007942187	2018-11-22 10:43:23	2018-11-22 10:43:26	CARMELO Sus cesantias en el FNA pueden ser la primera cuota de una casa. Hay subsidios disponibles, preguntelos. Quiere saber mas? SIN COSTO, responda SI o NO	Pendiente	2018-11-22	2018-11-22
4463772	39774268	AM	3174281709	2018-11-22 10:43:23	2018-11-22 10:43:26	No deje pasar el tiempo. Sus cesantias en el FNA pueden ser la primera cuota de una casa. Quiere saber mas? SIN COSTO, responda SI o NO	Pendiente	2018-11-22	2018-11-22
4463927	42077976	AM	3137544207	2018-11-22 10:43:23	2018-11-22 10:43:26	LUZ Sus cesantias en el FNA pueden ser la primera cuota de una casa. Hay subsidios disponibles, preguntelos. Quiere saber mas? SIN COSTO, responda SI o NO	Pendiente	2018-11-22	2018-11-22
4464981	1085249889	AM	3113965139	2018-11-22 10:43:23	2018-11-22 10:43:26	DAISSY Sea propietario! Sus cesantias en el FNA pueden ser la primera cuota de una casa. Quiere saber mas? SIN COSTO, responda SI o NO	Pendiente	2018-11-22	2018-11-22
4466153	16751326	AM	3164728433	2018-11-22 10:43:23	2018-11-22 19:24:34	Sea propietario! Sus cesantias en el FNA pueden ser la primera cuota de una casa. Quiere saber mas? SIN COSTO, responda SI o NO	SI	2018-11-22	2018-11-22	Muchas gracias por su respuesta. Un asesor del fondo Nacional del Ahorro se comunicara con usted.
4466949	94383183	AM	3174010417	2018-11-22 10:43:23	2018-11-22 10:43:26	HUMBERTO Sus cesantias en el FNA pueden ser la primera cuota de una casa para su familia. Quiere saber mas? SIN COSTO, responda SI o NO	Pendiente	2018-11-22	2018-11-22
4472483	78690219	AM	3107009233	2018-11-22 10:43:23	2018-11-22 10:43:26	Sus cesantias en el FNA pueden ser la primera cuota de una casa. En 2018 financiamos 9669 clientes como Ud. Quiere saber mas? SIN COSTO, responda SI o NO	Pendiente	2018-11-22	2018-11-22
4474075	43253109	AM	3113876238	2018-11-22 10:43:23	2018-11-22 10:43:26	YESSY Sus cesantias en el FNA pueden ser la primera cuota de una casa en MEDELLIN. Quiere saber mas? SIN COSTO, responda SI o NO	Pendiente	2018-11-22	2018-11-22
4475554	83247891	AM	3123415521	2018-11-22 10:43:23	2018-11-22 10:43:26	ARBEY Sus cesantias en el FNA pueden ser la primera cuota de una casa. En 2018 financiamos 9669 clientes como Ud. Quiere saber mas? SIN COSTO, responda SI o NO	Pendiente	2018-11-22	2018-11-22
6480614	94372699	AM	3217818718	2018-11-22 10:43:23	2018-11-22 10:43:26	Sea propietario! Sus cesantias en el FNA pueden ser la primera cuota de una casa. Quiere saber mas? SIN COSTO, responda SI o NO	Pendiente	2018-11-22	2018-11-22
6488822	1065596529	AM	3013040007	2018-11-22 10:43:23	2018-11-22 10:43:26	Sus cesantias en el FNA pueden ser la primera cuota de una casa. En 2018 financiamos 9669 clientes como Ud. Quiere saber mas? SIN COSTO, responda SI o NO	Pendiente	2018-11-22	2018-11-22
6489174	10268822	AM	3154374659	2018-11-22 10:43:23	2018-11-22 10:43:26	Sus cesantias en el FNA pueden ser la primera cuota de una casa. Quiere saber mas? SIN COSTO, responda SI o NO	Pendiente	2018-11-22	2018-11-22
6511931	25062642	AM	3127973068	2018-11-22 10:43:23	2018-11-22 13:54:04	Sus cesantias en el FNA pueden ser la primera cuota de una casa. Hay subsidios disponibles, preguntelos. Quiere saber mas? SIN COSTO, responda SI o NO	SI	2018-11-22	2018-11-22	Muchas gracias por su respuesta. Un asesor del fondo Nacional del Ahorro se comunicara con usted.
6517878	71669460	AM	3148320516	2018-11-22 10:43:23	2018-11-22 10:43:26	JUAN No deje pasar el tiempo. Sus cesantias en el FNA pueden ser la primera cuota de una casa. Quiere saber mas? SIN COSTO, responda SI o NO	Pendiente	2018-11-22	2018-11-22
6526498	71777843	AM	3126812024	2018-11-22 10:43:23	2018-11-22 10:43:26	GILBERTO No deje pasar el tiempo. Sus cesantias en el FNA pueden ser la primera cuota de una casa. Quiere saber mas? SIN COSTO, responda SI o NO	Pendiente	2018-11-22	2018-11-22
6532058	1047425853	AM	3166349554	2018-11-22 10:43:23	2018-11-22 10:43:26	MARY Sus cesantias en el FNA pueden ser la primera cuota de una casa. Hay subsidios disponibles, preguntelos. Quiere saber mas? SIN COSTO, responda SI o NO	Pendiente	2018-11-22	2018-11-22
6543285	31946064	AM	3104320406	2018-11-22 10:43:23	2018-11-22 10:43:26	Sus cesantias en el FNA pueden ser la primera cuota de una casa en CALI. Quiere saber mas? SIN COSTO, responda SI o NO	Pendiente	2018-11-22	2018-11-22
6552237	70518358	AM	3217549509	2018-11-22 10:43:23	2018-11-22 10:43:26	LEONARDO No deje pasar el tiempo. Sus cesantias en el FNA pueden ser la primera cuota de una casa. Quiere saber mas? SIN COSTO, responda SI o NO	Pendiente	2018-11-22	2018-11-22
6555678	36998225	AM	3184534248	2018-11-22 10:43:23	2018-11-22 10:43:26	ALBA Sus cesantias en el FNA pueden ser la primera cuota de una casa. En 2018 financiamos 9669 clientes como Ud. Quiere saber mas? SIN COSTO, responda SI o NO	Pendiente	2018-11-22	2018-11-22
6557375	71723942	AM	3136785695	2018-11-22 10:43:23	2018-11-22 10:43:26	Sus cesantias en el FNA pueden ser la primera cuota de una casa. En 2018 financiamos 9669 clientes como Ud. Quiere saber mas? SIN COSTO, responda SI o NO	Pendiente	2018-11-22	2018-11-22
6562182	14296129	AM	3115113140	2018-11-22 10:43:23	2018-11-22 10:43:26	RAUL Sus cesantias en el FNA pueden ser la primera cuota de una casa para su familia. Quiere saber mas? SIN COSTO, responda SI o NO	Pendiente	2018-11-22	2018-11-22
6564668	31322677	AM	3186680609	2018-11-22 10:43:23	2018-11-22 10:43:26	FRADY Sus cesantias en el FNA pueden ser la primera cuota de una casa para su familia. Quiere saber mas? SIN COSTO, responda SI o NO	Pendiente	2018-11-22	2018-11-22
7592647	32796277	AM	3002003009	2018-11-22 10:43:23	2018-11-22 10:43:26	Sea propietario! Sus cesantias en el FNA pueden ser la primera cuota de una casa. Quiere saber mas? SIN COSTO, responda SI o NO	Pendiente	2018-11-22	2018-11-22
7621194	1017155256	AM	3218575407	2018-11-22 10:43:23	2018-11-22 10:43:26	OSCAR No deje pasar el tiempo. Sus cesantias en el FNA pueden ser la primera cuota de una casa. Quiere saber mas? SIN COSTO, responda SI o NO	Pendiente	2018-11-22	2018-11-22
7654439	10223501	AM	3168319918	2018-11-22 10:43:23	2018-11-22 10:43:26	Sus cesantias en el FNA pueden ser la primera cuota de una casa. Hay subsidios disponibles, preguntelos. Quiere saber mas? SIN COSTO, responda SI o NO	Pendiente	2018-11-22	2018-11-22
7673594	71229297	AM	3005933887	2018-11-22 10:43:23	2018-11-22 10:43:26	Sus cesantias en el FNA pueden ser la primera cuota de una casa. En 2018 financiamos 9669 clientes como Ud. Quiere saber mas? SIN COSTO, responda SI o NO	Pendiente	2018-11-22	2018-11-22
7689556	9102588	AM	3126453491	2018-11-22 10:43:23	2018-11-22 11:00:21	LASCARIO Sus cesantias en el FNA pueden ser la primera cuota de una casa. En 2018 financiamos 9669 clientes como Ud. Quiere saber mas? SIN COSTO, responda SI o NO	SI	2018-11-22	2018-11-22	Muchas gracias por su respuesta. Un asesor del fondo Nacional del Ahorro se comunicara con usted.
7163001	40333977	AM	3125377276	2018-11-22 10:43:23	2018-11-22 19:48:37	NIDYA Sus cesantias en el FNA pueden ser la primera cuota de una casa. Hay subsidios disponibles, preguntelos. Quiere saber mas? SIN COSTO, responda SI o NO	SI	2018-11-22	2018-11-22	Muchas gracias por su respuesta. Un asesor del fondo Nacional del Ahorro se comunicara con usted.
7166490	71585089	AM	3115915418	2018-11-22 10:43:23	2018-11-22 10:43:26	OMAR Sus cesantias en el FNA pueden ser la primera cuota de una casa para su familia. Quiere saber mas? SIN COSTO, responda SI o NO	Pendiente	2018-11-22	2018-11-22
7172170	38600978	AM	3163601069	2018-11-22 10:43:23	2018-11-22 10:43:26	Sus cesantias en el FNA pueden ser la primera cuota de una casa. En 2018 financiamos 9669 clientes como Ud. Quiere saber mas? SIN COSTO, responda SI o NO	Pendiente	2018-11-22	2018-11-22
7185369	70104800	AM	3154639235	2018-11-22 10:43:23	2018-11-22 10:43:26	Sea propietario! Sus cesantias en el FNA pueden ser la primera cuota de una casa. Quiere saber mas? SIN COSTO, responda SI o NO	Pendiente	2018-11-22	2018-11-22
7202823	1130673234	AM	3176574659	2018-11-22 10:43:23	2018-11-22 10:43:26	JHONATAN Sus cesantias en el FNA pueden ser la primera cuota de una casa. Hay subsidios disponibles, preguntelos. Quiere saber mas? SIN COSTO, responda SI o NO	Pendiente	2018-11-22	2018-11-22
7204468	8129580	AM	3008246962	2018-11-22 10:43:23	2018-11-22 10:43:26	ALEJANDRO Sus cesantias en el FNA pueden ser la primera cuota de una casa. Hay subsidios disponibles, preguntelos. Quiere saber mas? SIN COSTO, responda SI o NO	Pendiente	2018-11-22	2018-11-22
7209889	21769997	AM	3128311387	2018-11-22 10:43:23	2018-11-22 10:43:26	Sus cesantias en el FNA pueden ser la primera cuota de una casa. En 2018 financiamos 9669 clientes como Ud. Quiere saber mas? SIN COSTO, responda SI o NO	Pendiente	2018-11-22	2018-11-22
7222490	15433187	AM	3007874523	2018-11-22 10:43:23	2018-11-22 10:43:26	Sus cesantias en el FNA pueden ser la primera cuota de una casa. En 2018 financiamos 9669 clientes como Ud. Quiere saber mas? SIN COSTO, responda SI o NO	Pendiente	2018-11-22	2018-11-22
7225789	10127905	AM	3174321412	2018-11-22 10:43:23	2018-11-22 10:43:26	ANIBAL No deje pasar el tiempo. Sus cesantias en el FNA pueden ser la primera cuota de una casa. Quiere saber mas? SIN COSTO, responda SI o NO	Pendiente	2018-11-22	2018-11-22
7238087	1017147799	AM	3137689872	2018-11-22 10:43:23	2018-11-22 10:43:26	JUAN Sus cesantias en el FNA pueden ser la primera cuota de una casa para su familia. Quiere saber mas? SIN COSTO, responda SI o NO	Pendiente	2018-11-22	2018-11-22
7241423	71339130	AM	3217092253	2018-11-22 10:43:23	2018-11-22 10:43:26	JUAN No deje pasar el tiempo. Sus cesantias en el FNA pueden ser la primera cuota de una casa. Quiere saber mas? SIN COSTO, responda SI o NO	Pendiente	2018-11-22	2018-11-22
2092924	25284507	AM	3105165871	2018-11-22 10:43:23	2018-11-22 10:43:26	Sus cesantias en el FNA pueden ser la primera cuota de una casa. En 2018 financiamos 9669 clientes como Ud. Quiere saber mas? SIN COSTO, responda SI o NO	Pendiente	2018-11-22	2018-11-22
2113854	11349881	AM	3107868868	2018-11-22 10:43:23	2018-11-22 10:43:26	NELSON Sus cesantias en el FNA pueden ser la primera cuota de una casa. Hay subsidios disponibles, preguntelos. Quiere saber mas? SIN COSTO, responda SI o NO	Pendiente	2018-11-22	2018-11-22
2116384	41944860	AM	3216478063	2018-11-22 10:43:23	2018-11-22 10:43:26	LUZ No deje pasar el tiempo. Sus cesantias en el FNA pueden ser la primera cuota de una casa. Quiere saber mas? SIN COSTO, responda SI o NO	Pendiente	2018-11-22	2018-11-22
2135807	7178041	AM	3004725526	2018-11-22 10:43:23	2018-11-22 10:43:26	JULIAN Sea propietario! Sus cesantias en el FNA pueden ser la primera cuota de una casa. Quiere saber mas? SIN COSTO, responda SI o NO	Pendiente	2018-11-22	2018-11-22
2139142	6760575	AM	3005587349	2018-11-22 10:43:23	2018-11-22 10:43:26	MANUEL Sus cesantias en el FNA pueden ser la primera cuota de una casa en TUNJA. Quiere saber mas? SIN COSTO, responda SI o NO	Pendiente	2018-11-22	2018-11-22
2145742	10547926	AM	3137202842	2018-11-22 10:43:23	2018-11-22 11:17:30	EDGAR No deje pasar el tiempo. Sus cesantias en el FNA pueden ser la primera cuota de una casa. Quiere saber mas? SIN COSTO, responda SI o NO	SI	2018-11-22	2018-11-22	Muchas gracias por su respuesta. Un asesor del fondo Nacional del Ahorro se comunicara con usted.
2150302	32882297	AM	3126205786	2018-11-22 10:43:23	2018-11-22 10:43:26	Sus cesantias en el FNA pueden ser la primera cuota de una casa. Quiere saber mas? SIN COSTO, responda SI o NO	Pendiente	2018-11-22	2018-11-22
2152425	9656388	AM	3107575526	2018-11-22 10:43:23	2018-11-22 10:43:26	Sus cesantias en el FNA pueden ser la primera cuota de una casa. Hay subsidios disponibles, preguntelos. Quiere saber mas? SIN COSTO, responda SI o NO	Pendiente	2018-11-22	2018-11-22
2157395	24340863	AM	3103059031	2018-11-22 10:43:23	2018-11-22 10:43:26	Sus cesantias en el FNA pueden ser la primera cuota de una casa. Hay subsidios disponibles, preguntelos. Quiere saber mas? SIN COSTO, responda SI o NO	Pendiente	2018-11-22	2018-11-22
2168859	30393800	AM	3117205732	2018-11-22 10:43:23	2018-11-22 10:43:26	SANDRA Sus cesantias en el FNA pueden ser la primera cuota de una casa en PEREIRA. Quiere saber mas? SIN COSTO, responda SI o NO	Pendiente	2018-11-22	2018-11-22
2169793	97446187	AM	3126185407	2018-11-22 10:43:23	2018-11-22 10:43:26	Sus cesantias en el FNA pueden ser la primera cuota de una casa en TUNJA. Quiere saber mas? SIN COSTO, responda SI o NO	Pendiente	2018-11-22	2018-11-22
2175818	6012034	AM	3214933973	2018-11-22 10:43:23	2018-11-22 10:43:26	No deje pasar el tiempo. Sus cesantias en el FNA pueden ser la primera cuota de una casa. Quiere saber mas? SIN COSTO, responda SI o NO	Pendiente	2018-11-22	2018-11-22
2179070	66822954	AM	3003981996	2018-11-22 10:43:23	2018-11-22 11:47:32	VIVIANA Sus cesantias en el FNA pueden ser la primera cuota de una casa. Hay subsidios disponibles, preguntelos. Quiere saber mas? SIN COSTO, responda SI o NO	SI	2018-11-22	2018-11-22	Muchas gracias por su respuesta. Un asesor del fondo Nacional del Ahorro se comunicara con usted.
3432105	75104506	AM	3113673668	2018-11-22 10:43:23	2018-11-22 10:43:26	Sea propietario! Sus cesantias en el FNA pueden ser la primera cuota de una casa. Quiere saber mas? SIN COSTO, responda SI o NO	Pendiente	2018-11-22	2018-11-22
3438949	15928097	AM	3131573266	2018-11-22 10:43:23	2018-11-22 10:43:26	Sus cesantias en el FNA pueden ser la primera cuota de una casa en MANIZALES. Quiere saber mas? SIN COSTO, responda SI o NO	Pendiente	2018-11-22	2018-11-22
3441675	1129514678	AM	3004507294	2018-11-22 10:43:23	2018-11-22 10:43:26	Sea propietario! Sus cesantias en el FNA pueden ser la primera cuota de una casa. Quiere saber mas? SIN COSTO, responda SI o NO	Pendiente	2018-11-22	2018-11-22
3450837	1069256092	AM	3114930059	2018-11-22 10:43:23	2018-11-22 10:43:26	Sea propietario! Sus cesantias en el FNA pueden ser la primera cuota de una casa. Quiere saber mas? SIN COSTO, responda SI o NO	Pendiente	2018-11-22	2018-11-22
3453681	28929346	AM	3148904465	2018-11-22 10:43:23	2018-11-22 10:43:26	DIANA Sus cesantias en el FNA pueden ser la primera cuota de una casa en IBAGUE. Quiere saber mas? SIN COSTO, responda SI o NO	Pendiente	2018-11-22	2018-11-22
3455920	30283886	AM	3105159589	2018-11-22 10:43:23	2018-11-22 10:43:26	Sus cesantias en el FNA pueden ser la primera cuota de una casa en MANIZALES. Quiere saber mas? SIN COSTO, responda SI o NO	Pendiente	2018-11-22	2018-11-22
3457653	74372486	AM	3005673784	2018-11-22 10:43:23	2018-11-22 10:43:26	LUIS Sus cesantias en el FNA pueden ser la primera cuota de una casa para su familia. Quiere saber mas? SIN COSTO, responda SI o NO	Pendiente	2018-11-22	2018-11-22
3462576	66920514	AM	3138872674	2018-11-22 10:43:23	2018-11-22 10:43:26	Sus cesantias en el FNA pueden ser la primera cuota de una casa para su familia. Quiere saber mas? SIN COSTO, responda SI o NO	Pendiente	2018-11-22	2018-11-22
3468201	38246644	AM	3125721554	2018-11-22 10:43:23	2018-11-22 10:43:26	Sus cesantias en el FNA pueden ser la primera cuota de una casa. En 2018 financiamos 9669 clientes como Ud. Quiere saber mas? SIN COSTO, responda SI o NO	Pendiente	2018-11-22	2018-11-22
3471958	43666124	AM	3146642879	2018-11-22 10:43:23	2018-11-22 10:43:26	BEATRIZ Sus cesantias en el FNA pueden ser la primera cuota de una casa para su familia. Quiere saber mas? SIN COSTO, responda SI o NO	Pendiente	2018-11-22	2018-11-22
3482055	59816671	AM	3113377006	2018-11-22 10:43:23	2018-11-22 10:43:26	Sus cesantias en el FNA pueden ser la primera cuota de una casa. Hay subsidios disponibles, preguntelos. Quiere saber mas? SIN COSTO, responda SI o NO	Pendiente	2018-11-22	2018-11-22
3495176	36543678	AM	3145974805	2018-11-22 10:43:23	2018-11-22 10:43:26	No deje pasar el tiempo. Sus cesantias en el FNA pueden ser la primera cuota de una casa. Quiere saber mas? SIN COSTO, responda SI o NO	Pendiente	2018-11-22	2018-11-22
3504228	46383954	AM	3115500090	2018-11-22 10:43:23	2018-11-22 10:43:26	DIANA No deje pasar el tiempo. Sus cesantias en el FNA pueden ser la primera cuota de una casa. Quiere saber mas? SIN COSTO, responda SI o NO	Pendiente	2018-11-22	2018-11-22
3505307	91242941	AM	3223100085	2018-11-22 10:43:23	2018-11-22 10:43:26	Sus cesantias en el FNA pueden ser la primera cuota de una casa. En 2018 financiamos 9669 clientes como Ud. Quiere saber mas? SIN COSTO, responda SI o NO	Pendiente	2018-11-22	2018-11-22
3506925	12994891	AM	3127637935	2018-11-22 10:43:23	2018-11-22 10:43:26	Sus cesantias en el FNA pueden ser la primera cuota de una casa para su familia. Quiere saber mas? SIN COSTO, responda SI o NO	Pendiente	2018-11-22	2018-11-22
3510372	1067865902	AM	3017553363	2018-11-22 10:43:23	2018-11-22 10:43:26	Sus cesantias en el FNA pueden ser la primera cuota de una casa. Quiere saber mas? SIN COSTO, responda SI o NO	Pendiente	2018-11-22	2018-11-22
3519674	32733348	AM	3008007509	2018-11-22 10:43:23	2018-11-22 10:43:26	Sus cesantias en el FNA pueden ser la primera cuota de una casa. Hay subsidios disponibles, preguntelos. Quiere saber mas? SIN COSTO, responda SI o NO	Pendiente	2018-11-22	2018-11-22
3523623	25292656	AM	3123724483	2018-11-22 10:43:23	2018-11-22 10:43:26	No deje pasar el tiempo. Sus cesantias en el FNA pueden ser la primera cuota de una casa. Quiere saber mas? SIN COSTO, responda SI o NO	Pendiente	2018-11-22	2018-11-22
3531429	91298870	AM	3105651639	2018-11-22 10:43:23	2018-11-22 10:43:26	Sus cesantias en el FNA pueden ser la primera cuota de una casa en BUCARAMANGA. Quiere saber mas? SIN COSTO, responda SI o NO	Pendiente	2018-11-22	2018-11-22
4707625	10000680	AM	3217222878	2018-11-22 10:43:23	2018-11-22 10:43:26	LUIS Sus cesantias en el FNA pueden ser la primera cuota de una casa en MEDELLIN. Quiere saber mas? SIN COSTO, responda SI o NO	Pendiente	2018-11-22	2018-11-22
4711795	3836888	AM	3175757264	2018-11-22 10:43:23	2018-11-22 10:43:26	Sus cesantias en el FNA pueden ser la primera cuota de una casa para su familia. Quiere saber mas? SIN COSTO, responda SI o NO	Pendiente	2018-11-22	2018-11-22
4725664	71311671	AM	3122810047	2018-11-22 10:43:23	2018-11-22 10:43:26	Sus cesantias en el FNA pueden ser la primera cuota de una casa. Quiere saber mas? SIN COSTO, responda SI o NO	Pendiente	2018-11-22	2018-11-22
4725809	63306258	AM	3152075393	2018-11-22 10:43:23	2018-11-22 10:43:26	MARIA No deje pasar el tiempo. Sus cesantias en el FNA pueden ser la primera cuota de una casa. Quiere saber mas? SIN COSTO, responda SI o NO	Pendiente	2018-11-22	2018-11-22
4728767	74280010	AM	3005637425	2018-11-22 10:43:23	2018-11-22 10:43:26	RAFAEL Sea propietario! Sus cesantias en el FNA pueden ser la primera cuota de una casa. Quiere saber mas? SIN COSTO, responda SI o NO	Pendiente	2018-11-22	2018-11-22
4732717	1123623344	AM	3157702301	2018-11-22 10:43:23	2018-11-22 10:43:26	Sus cesantias en el FNA pueden ser la primera cuota de una casa. En 2018 financiamos 9669 clientes como Ud. Quiere saber mas? SIN COSTO, responda SI o NO	Pendiente	2018-11-22	2018-11-22
4737308	46455448	AM	3177869918	2018-11-22 10:43:23	2018-11-22 10:43:26	LUZ Sus cesantias en el FNA pueden ser la primera cuota de una casa para su familia. Quiere saber mas? SIN COSTO, responda SI o NO	Pendiente	2018-11-22	2018-11-22
4751006	9395619	AM	3103048625	2018-11-22 10:43:23	2018-11-22 10:43:26	RODRIGO Sus cesantias en el FNA pueden ser la primera cuota de una casa. Hay subsidios disponibles, preguntelos. Quiere saber mas? SIN COSTO, responda SI o NO	Pendiente	2018-11-22	2018-11-22
4757557	1051655890	AM	3016441574	2018-11-22 10:43:23	2018-11-22 10:43:26	YENNIFER No deje pasar el tiempo. Sus cesantias en el FNA pueden ser la primera cuota de una casa. Quiere saber mas? SIN COSTO, responda SI o NO	Pendiente	2018-11-22	2018-11-22
4759563	31485544	AM	3113961400	2018-11-22 10:43:23	2018-11-22 10:45:02	JOHANA Sea propietario! Sus cesantias en el FNA pueden ser la primera cuota de una casa. Quiere saber mas? SIN COSTO, responda SI o NO	SI	2018-11-22	2018-11-22	Muchas gracias por su respuesta. Un asesor del fondo Nacional del Ahorro se comunicara con usted.
4761222	1144024676	AM	3128583398	2018-11-22 10:43:23	2018-11-22 10:43:26	ADRIANA Sus cesantias en el FNA pueden ser la primera cuota de una casa para su familia. Quiere saber mas? SIN COSTO, responda SI o NO	Pendiente	2018-11-22	2018-11-22
4768065	1075242647	AM	3138680161	2018-11-22 10:43:23	2018-11-22 10:43:26	Sus cesantias en el FNA pueden ser la primera cuota de una casa. Hay subsidios disponibles, preguntelos. Quiere saber mas? SIN COSTO, responda SI o NO	Pendiente	2018-11-22	2018-11-22
4768589	1128053255	AM	3003437985	2018-11-22 10:43:23	2018-11-22 10:43:26	Sus cesantias en el FNA pueden ser la primera cuota de una casa para su familia. Quiere saber mas? SIN COSTO, responda SI o NO	Pendiente	2018-11-22	2018-11-22
4768596	57462360	AM	3015019318	2018-11-22 10:43:23	2018-11-22 10:43:26	BRENDA Sus cesantias en el FNA pueden ser la primera cuota de una casa. Hay subsidios disponibles, preguntelos. Quiere saber mas? SIN COSTO, responda SI o NO	Pendiente	2018-11-22	2018-11-22
4768714	37339017	AM	3508132252	2018-11-22 10:43:23	2018-11-22 10:43:26	Sea propietario! Sus cesantias en el FNA pueden ser la primera cuota de una casa. Quiere saber mas? SIN COSTO, responda SI o NO	Pendiente	2018-11-22	2018-11-22
4768748	71191456	AM	3128115421	2018-11-22 10:43:23	2018-11-22 14:07:48	Sus cesantias en el FNA pueden ser la primera cuota de una casa para su familia. Quiere saber mas? SIN COSTO, responda SI o NO	SI	2018-11-22	2018-11-22	Muchas gracias por su respuesta. Un asesor del fondo Nacional del Ahorro se comunicara con usted.
4781044	30278260	AM	3104368563	2018-11-22 10:43:23	2018-11-22 10:43:26	Sus cesantias en el FNA pueden ser la primera cuota de una casa en MANIZALES. Quiere saber mas? SIN COSTO, responda SI o NO	Pendiente	2018-11-22	2018-11-22
4781929	66833487	AM	3163671800	2018-11-22 10:43:23	2018-11-22 10:43:26	Sus cesantias en el FNA pueden ser la primera cuota de una casa. Quiere saber mas? SIN COSTO, responda SI o NO	Pendiente	2018-11-22	2018-11-22
4784514	8358289	AM	3216432915	2018-11-22 10:43:23	2018-11-22 10:46:27	LUIS No deje pasar el tiempo. Sus cesantias en el FNA pueden ser la primera cuota de una casa. Quiere saber mas? SIN COSTO, responda SI o NO	SI	2018-11-22	2018-11-22	Muchas gracias por su respuesta. Un asesor del fondo Nacional del Ahorro se comunicara con usted.
4796275	77027019	AM	3205746488	2018-11-22 10:43:23	2018-11-22 10:43:26	Sus cesantias en el FNA pueden ser la primera cuota de una casa. Quiere saber mas? SIN COSTO, responda SI o NO	Pendiente	2018-11-22	2018-11-22
4801957	21896909	AM	3122648779	2018-11-22 10:43:23	2018-11-22 15:37:06	ELIANA Sus cesantias en el FNA pueden ser la primera cuota de una casa en MEDELLIN. Quiere saber mas? SIN COSTO, responda SI o NO	SI	2018-11-22	2018-11-22	Muchas gracias por su respuesta. Un asesor del fondo Nacional del Ahorro se comunicara con usted.
4805658	72001371	AM	3172573715	2018-11-22 10:43:23	2018-11-22 10:43:26	Sea propietario! Sus cesantias en el FNA pueden ser la primera cuota de una casa. Quiere saber mas? SIN COSTO, responda SI o NO	Pendiente	2018-11-22	2018-11-22
6979959	73191322	AM	3126707673	2018-11-22 10:43:23	2018-11-22 10:43:26	KLEYVER Sus cesantias en el FNA pueden ser la primera cuota de una casa para su familia. Quiere saber mas? SIN COSTO, responda SI o NO	Pendiente	2018-11-22	2018-11-22
6987054	30320485	AM	3103961724	2018-11-22 10:43:23	2018-11-22 10:43:26	No deje pasar el tiempo. Sus cesantias en el FNA pueden ser la primera cuota de una casa. Quiere saber mas? SIN COSTO, responda SI o NO	Pendiente	2018-11-22	2018-11-22
7000154	71212247	AM	3146361996	2018-11-22 10:43:23	2018-11-22 10:43:26	JORGE No deje pasar el tiempo. Sus cesantias en el FNA pueden ser la primera cuota de una casa. Quiere saber mas? SIN COSTO, responda SI o NO	Pendiente	2018-11-22	2018-11-22
7006647	93366070	AM	3186941332	2018-11-22 10:43:23	2018-11-22 10:43:26	Sus cesantias en el FNA pueden ser la primera cuota de una casa en IBAGUE. Quiere saber mas? SIN COSTO, responda SI o NO	Pendiente	2018-11-22	2018-11-22
7019143	1042423899	AM	3003614902	2018-11-22 10:43:23	2018-11-22 10:43:26	Sus cesantias en el FNA pueden ser la primera cuota de una casa. Hay subsidios disponibles, preguntelos. Quiere saber mas? SIN COSTO, responda SI o NO	Pendiente	2018-11-22	2018-11-22
7034762	1129564166	AM	3008402681	2018-11-22 10:43:23	2018-11-22 10:43:26	YECID Sus cesantias en el FNA pueden ser la primera cuota de una casa. En 2018 financiamos 9669 clientes como Ud. Quiere saber mas? SIN COSTO, responda SI o NO	Pendiente	2018-11-22	2018-11-22
7040541	98523429	AM	3103939264	2018-11-22 10:43:23	2018-11-22 10:43:26	Sus cesantias en el FNA pueden ser la primera cuota de una casa. Quiere saber mas? SIN COSTO, responda SI o NO	Pendiente	2018-11-22	2018-11-22
7052432	30304863	AM	3206413713	2018-11-22 10:43:23	2018-11-22 10:55:08	Sus cesantias en el FNA pueden ser la primera cuota de una casa para su familia. Quiere saber mas? SIN COSTO, responda SI o NO	SI	2018-11-22	2018-11-22	Muchas gracias por su respuesta. Un asesor del fondo Nacional del Ahorro se comunicara con usted.
7061320	91222727	AM	3163298727	2018-11-22 10:43:23	2018-11-22 10:43:26	Sus cesantias en el FNA pueden ser la primera cuota de una casa en BUCARAMANGA. Quiere saber mas? SIN COSTO, responda SI o NO	Pendiente	2018-11-22	2018-11-22
7064540	39566729	AM	3125224966	2018-11-22 10:43:23	2018-11-22 10:43:26	MERCEDES Sus cesantias en el FNA pueden ser la primera cuota de una casa en IBAGUE. Quiere saber mas? SIN COSTO, responda SI o NO	Pendiente	2018-11-22	2018-11-22
7071392	22478142	AM	3103715704	2018-11-22 10:43:23	2018-11-22 10:43:26	Sus cesantias en el FNA pueden ser la primera cuota de una casa para su familia. Quiere saber mas? SIN COSTO, responda SI o NO	Pendiente	2018-11-22	2018-11-22
7074254	14575668	AM	3163743449	2018-11-22 10:43:23	2018-11-22 10:43:26	HECTOR Sus cesantias en el FNA pueden ser la primera cuota de una casa. En 2018 financiamos 9669 clientes como Ud. Quiere saber mas? SIN COSTO, responda SI o NO	Pendiente	2018-11-22	2018-11-22
7078949	70116699	AM	3116364336	2018-11-22 10:43:23	2018-11-22 10:43:26	Sus cesantias en el FNA pueden ser la primera cuota de una casa en MEDELLIN. Quiere saber mas? SIN COSTO, responda SI o NO	Pendiente	2018-11-22	2018-11-22
1121673	85468428	AM	3208650028	2018-11-22 10:43:23	2018-11-22 10:43:26	MANUEL No deje pasar el tiempo. Sus cesantias en el FNA pueden ser la primera cuota de una casa. Quiere saber mas? SIN COSTO, responda SI o NO	Pendiente	2018-11-22	2018-11-22
1124279	12109171	AM	3153230333	2018-11-22 10:43:23	2018-11-22 10:43:26	ALVARO Sus cesantias en el FNA pueden ser la primera cuota de una casa en NEIVA. Quiere saber mas? SIN COSTO, responda SI o NO	Pendiente	2018-11-22	2018-11-22
1127516	65769477	AM	3103316184	2018-11-22 10:43:23	2018-11-22 10:43:26	XIMENA No deje pasar el tiempo. Sus cesantias en el FNA pueden ser la primera cuota de una casa. Quiere saber mas? SIN COSTO, responda SI o NO	Pendiente	2018-11-22	2018-11-22
1130911	4123174	AM	3118947936	2018-11-22 10:43:23	2018-11-22 10:43:26	Sus cesantias en el FNA pueden ser la primera cuota de una casa. En 2018 financiamos 9669 clientes como Ud. Quiere saber mas? SIN COSTO, responda SI o NO	Pendiente	2018-11-22	2018-11-22
1149936	14679867	AM	3206417884	2018-11-22 10:43:23	2018-11-22 10:43:26	No deje pasar el tiempo. Sus cesantias en el FNA pueden ser la primera cuota de una casa. Quiere saber mas? SIN COSTO, responda SI o NO	Pendiente	2018-11-22	2018-11-22
1153472	59365081	AM	3154930875	2018-11-22 10:43:23	2018-11-22 10:43:26	Sus cesantias en el FNA pueden ser la primera cuota de una casa. Hay subsidios disponibles, preguntelos. Quiere saber mas? SIN COSTO, responda SI o NO	Pendiente	2018-11-22	2018-11-22
1164489	25274415	AM	3207267235	2018-11-22 10:43:23	2018-11-22 10:43:26	Sus cesantias en el FNA pueden ser la primera cuota de una casa en POPAYAN. Quiere saber mas? SIN COSTO, responda SI o NO	Pendiente	2018-11-22	2018-11-22
1165117	92506659	AM	3157744657	2018-11-22 10:43:23	2018-11-22 10:43:26	TOMAS Sus cesantias en el FNA pueden ser la primera cuota de una casa en CARTAGENA. Quiere saber mas? SIN COSTO, responda SI o NO	Pendiente	2018-11-22	2018-11-22
1172900	93123673	AM	3103351644	2018-11-22 10:43:23	2018-11-22 10:43:26	ALDEMAR No deje pasar el tiempo. Sus cesantias en el FNA pueden ser la primera cuota de una casa. Quiere saber mas? SIN COSTO, responda SI o NO	Pendiente	2018-11-22	2018-11-22
1176950	13446727	AM	3002127165	2018-11-22 10:43:23	2018-11-22 10:43:26	Sus cesantias en el FNA pueden ser la primera cuota de una casa. Hay subsidios disponibles, preguntelos. Quiere saber mas? SIN COSTO, responda SI o NO	Pendiente	2018-11-22	2018-11-22
1203735	8302644	AM	3156704256	2018-11-22 10:43:23	2018-11-22 10:43:26	Sus cesantias en el FNA pueden ser la primera cuota de una casa. Quiere saber mas? SIN COSTO, responda SI o NO	Pendiente	2018-11-22	2018-11-22
4327051	7557901	AM	3122097223	2018-11-22 10:43:23	2018-11-22 10:43:26	JULIAN Sus cesantias en el FNA pueden ser la primera cuota de una casa. Hay subsidios disponibles, preguntelos. Quiere saber mas? SIN COSTO, responda SI o NO	Pendiente	2018-11-22	2018-11-22
4329928	34941851	AM	3178232305	2018-11-22 10:43:23	2018-11-22 10:43:26	GEORGINA Sus cesantias en el FNA pueden ser la primera cuota de una casa. Hay subsidios disponibles, preguntelos. Quiere saber mas? SIN COSTO, responda SI o NO	Pendiente	2018-11-22	2018-11-22
4331558	27177479	AM	3117824578	2018-11-22 10:43:23	2018-11-22 10:43:26	OMAIRA Sus cesantias en el FNA pueden ser la primera cuota de una casa. Hay subsidios disponibles, preguntelos. Quiere saber mas? SIN COSTO, responda SI o NO	Pendiente	2018-11-22	2018-11-22
4333346	66948262	AM	3155662746	2018-11-22 10:43:23	2018-11-22 10:43:26	Sus cesantias en el FNA pueden ser la primera cuota de una casa. Hay subsidios disponibles, preguntelos. Quiere saber mas? SIN COSTO, responda SI o NO	Pendiente	2018-11-22	2018-11-22
4334063	1140816498	AM	3183879549	2018-11-22 10:43:23	2018-11-22 10:43:26	Sus cesantias en el FNA pueden ser la primera cuota de una casa en BARRANQUILLA. Quiere saber mas? SIN COSTO, responda SI o NO	Pendiente	2018-11-22	2018-11-22
4339962	10234571	AM	3155400623	2018-11-22 10:43:23	2018-11-22 10:43:26	FRANCISCO Sea propietario! Sus cesantias en el FNA pueden ser la primera cuota de una casa. Quiere saber mas? SIN COSTO, responda SI o NO	Pendiente	2018-11-22	2018-11-22
4343595	71640146	AM	3163692160	2018-11-22 10:43:23	2018-11-22 10:43:26	Sus cesantias en el FNA pueden ser la primera cuota de una casa en MEDELLIN. Quiere saber mas? SIN COSTO, responda SI o NO	Pendiente	2018-11-22	2018-11-22
4350139	74378944	AM	3112182517	2018-11-22 10:43:23	2018-11-22 10:43:26	RICARDO Sus cesantias en el FNA pueden ser la primera cuota de una casa en DUITAMA. Quiere saber mas? SIN COSTO, responda SI o NO	Pendiente	2018-11-22	2018-11-22
4353204	1075234248	AM	3202958396	2018-11-22 10:43:23	2018-11-22 10:43:26	Sus cesantias en el FNA pueden ser la primera cuota de una casa. Quiere saber mas? SIN COSTO, responda SI o NO	Pendiente	2018-11-22	2018-11-22
4359777	91439537	AM	3002013474	2018-11-22 10:43:23	2018-11-22 10:43:26	MIGUEL Sus cesantias en el FNA pueden ser la primera cuota de una casa para su familia. Quiere saber mas? SIN COSTO, responda SI o NO	Pendiente	2018-11-22	2018-11-22
4361272	21939314	AM	3216251060	2018-11-22 10:43:23	2018-11-22 10:43:26	Sus cesantias en el FNA pueden ser la primera cuota de una casa. Quiere saber mas? SIN COSTO, responda SI o NO	Pendiente	2018-11-22	2018-11-22
4366708	8013108	AM	3136519372	2018-11-22 10:43:23	2018-11-22 10:43:26	Sus cesantias en el FNA pueden ser la primera cuota de una casa. Quiere saber mas? SIN COSTO, responda SI o NO	Pendiente	2018-11-22	2018-11-22
4367829	4612404	AM	3122499974	2018-11-22 10:43:23	2018-11-22 10:44:51	Sea propietario! Sus cesantias en el FNA pueden ser la primera cuota de una casa. Quiere saber mas? SIN COSTO, responda SI o NO	SI	2018-11-22	2018-11-22	Muchas gracias por su respuesta. Un asesor del fondo Nacional del Ahorro se comunicara con usted.
4370553	4208338	AM	3223489743	2018-11-22 10:43:23	2018-11-22 10:45:23	WILSON Sea propietario! Sus cesantias en el FNA pueden ser la primera cuota de una casa. Quiere saber mas? SIN COSTO, responda SI o NO	SI	2018-11-22	2018-11-22	Muchas gracias por su respuesta. Un asesor del fondo Nacional del Ahorro se comunicara con usted.
4373662	1003265202	AM	3006387104	2018-11-22 10:43:23	2018-11-22 10:43:26	Sea propietario! Sus cesantias en el FNA pueden ser la primera cuota de una casa. Quiere saber mas? SIN COSTO, responda SI o NO	Pendiente	2018-11-22	2018-11-22
4381554	18938771	AM	3135900122	2018-11-22 10:43:23	2018-11-22 10:43:26	Sus cesantias en el FNA pueden ser la primera cuota de una casa. Hay subsidios disponibles, preguntelos. Quiere saber mas? SIN COSTO, responda SI o NO	Pendiente	2018-11-22	2018-11-22
11228295	1015276626	AM	3186380867	2018-11-22 10:43:23	2018-11-22 10:43:26	JULIANA Sus cesantias en el FNA pueden ser la primera cuota de una casa. En 2018 financiamos 9669 clientes como Ud. Quiere saber mas? SIN COSTO, responda SI o NO	Pendiente	2018-11-22	2018-11-22
11240412	73237146	AM	3145837681	2018-11-22 10:43:23	2018-11-22 10:43:26	Sea propietario! Sus cesantias en el FNA pueden ser la primera cuota de una casa. Quiere saber mas? SIN COSTO, responda SI o NO	Pendiente	2018-11-22	2018-11-22
11262517	45550363	AM	3003974172	2018-11-22 10:43:23	2018-11-22 10:43:26	Sea propietario! Sus cesantias en el FNA pueden ser la primera cuota de una casa. Quiere saber mas? SIN COSTO, responda SI o NO	Pendiente	2018-11-22	2018-11-22
11266816	93125796	AM	3144569009	2018-11-22 10:43:23	2018-11-22 10:43:26	Sus cesantias en el FNA pueden ser la primera cuota de una casa. Quiere saber mas? SIN COSTO, responda SI o NO	Pendiente	2018-11-22	2018-11-22
11268061	1041230541	AM	3216217204	2018-11-22 10:43:23	2018-11-22 10:43:26	Sus cesantias en el FNA pueden ser la primera cuota de una casa en MEDELLIN. Quiere saber mas? SIN COSTO, responda SI o NO	Pendiente	2018-11-22	2018-11-22
11280466	8743773	AM	3135239842	2018-11-22 10:43:23	2018-11-22 10:43:26	RAFAEL Sus cesantias en el FNA pueden ser la primera cuota de una casa para su familia. Quiere saber mas? SIN COSTO, responda SI o NO	Pendiente	2018-11-22	2018-11-22
11292734	75082377	AM	3104949772	2018-11-22 10:43:23	2018-11-22 10:43:26	Sus cesantias en el FNA pueden ser la primera cuota de una casa para su familia. Quiere saber mas? SIN COSTO, responda SI o NO	Pendiente	2018-11-22	2018-11-22
11308726	80664357	AM	3013178989	2018-11-22 10:43:23	2018-11-22 10:52:57	Sus cesantias en el FNA pueden ser la primera cuota de una casa. Hay subsidios disponibles, preguntelos. Quiere saber mas? SIN COSTO, responda SI o NO	SI	2018-11-22	2018-11-22	Muchas gracias por su respuesta. Un asesor del fondo Nacional del Ahorro se comunicara con usted.
11320811	43513114	AM	3023290682	2018-11-22 10:43:23	2018-11-22 10:43:26	Sus cesantias en el FNA pueden ser la primera cuota de una casa. En 2018 financiamos 9669 clientes como Ud. Quiere saber mas? SIN COSTO, responda SI o NO	Pendiente	2018-11-22	2018-11-22
11327932	10721040	AM	3142148268	2018-11-22 10:43:23	2018-11-22 10:43:26	JOSE Sus cesantias en el FNA pueden ser la primera cuota de una casa. Hay subsidios disponibles, preguntelos. Quiere saber mas? SIN COSTO, responda SI o NO	Pendiente	2018-11-22	2018-11-22
11338516	30411898	AM	3154163412	2018-11-22 10:43:23	2018-11-22 10:43:26	CLAUDIA Sus cesantias en el FNA pueden ser la primera cuota de una casa. Hay subsidios disponibles, preguntelos. Quiere saber mas? SIN COSTO, responda SI o NO	Pendiente	2018-11-22	2018-11-22
11343484	43537770	AM	3113768491	2018-11-22 10:43:23	2018-11-22 10:43:26	Sus cesantias en el FNA pueden ser la primera cuota de una casa en MEDELLIN. Quiere saber mas? SIN COSTO, responda SI o NO	Pendiente	2018-11-22	2018-11-22
2753618	60380120	AM	3118748101	2018-11-22 10:43:23	2018-11-22 11:20:03	LUZ Sus cesantias en el FNA pueden ser la primera cuota de una casa. Hay subsidios disponibles, preguntelos. Quiere saber mas? SIN COSTO, responda SI o NO	SI	2018-11-22	2018-11-22	Muchas gracias por su respuesta. Un asesor del fondo Nacional del Ahorro se comunicara con usted.
2754209	66859806	AM	3154197554	2018-11-22 10:43:23	2018-11-22 10:44:12	NORMA Sus cesantias en el FNA pueden ser la primera cuota de una casa en CALI. Quiere saber mas? SIN COSTO, responda SI o NO	SI	2018-11-22	2018-11-22	Muchas gracias por su respuesta. Un asesor del fondo Nacional del Ahorro se comunicara con usted.
2766132	60356372	AM	3115033689	2018-11-22 10:43:23	2018-11-22 10:43:26	ELIZABETH Sus cesantias en el FNA pueden ser la primera cuota de una casa. En 2018 financiamos 9669 clientes como Ud. Quiere saber mas? SIN COSTO, responda SI o NO	Pendiente	2018-11-22	2018-11-22
2767029	51630726	AM	3142510417	2018-11-22 10:43:23	2018-11-22 10:43:26	Sus cesantias en el FNA pueden ser la primera cuota de una casa. Hay subsidios disponibles, preguntelos. Quiere saber mas? SIN COSTO, responda SI o NO	Pendiente	2018-11-22	2018-11-22
2768242	24149862	AM	3125832420	2018-11-22 10:43:23	2018-11-22 10:43:26	DOLLY Sus cesantias en el FNA pueden ser la primera cuota de una casa para su familia. Quiere saber mas? SIN COSTO, responda SI o NO	Pendiente	2018-11-22	2018-11-22
2770104	78016035	AM	3114170849	2018-11-22 10:43:23	2018-11-22 10:43:26	Sus cesantias en el FNA pueden ser la primera cuota de una casa. Hay subsidios disponibles, preguntelos. Quiere saber mas? SIN COSTO, responda SI o NO	Pendiente	2018-11-22	2018-11-22
2770748	94456420	AM	3014430931	2018-11-22 10:43:23	2018-11-22 10:43:26	Sus cesantias en el FNA pueden ser la primera cuota de una casa para su familia. Quiere saber mas? SIN COSTO, responda SI o NO	Pendiente	2018-11-22	2018-11-22
2775790	33341792	AM	3114251849	2018-11-22 10:43:23	2018-11-22 10:43:26	Sus cesantias en el FNA pueden ser la primera cuota de una casa en BARRANQUILLA. Quiere saber mas? SIN COSTO, responda SI o NO	Pendiente	2018-11-22	2018-11-22
2777469	25364034	AM	3113245859	2018-11-22 10:43:23	2018-11-22 10:43:26	JANETH Sea propietario! Sus cesantias en el FNA pueden ser la primera cuota de una casa. Quiere saber mas? SIN COSTO, responda SI o NO	Pendiente	2018-11-22	2018-11-22
2780099	75088380	AM	3202217440	2018-11-22 10:43:23	2018-11-22 12:51:06	EIMAR Sus cesantias en el FNA pueden ser la primera cuota de una casa en MANIZALES. Quiere saber mas? SIN COSTO, responda SI o NO	SI	2018-11-22	2018-11-22	Muchas gracias por su respuesta. Un asesor del fondo Nacional del Ahorro se comunicara con usted.
2784434	36951686	AM	3185485348	2018-11-22 10:43:23	2018-11-22 10:43:26	MARY Sus cesantias en el FNA pueden ser la primera cuota de una casa para su familia. Quiere saber mas? SIN COSTO, responda SI o NO	Pendiente	2018-11-22	2018-11-22
2791256	34566017	AM	3104275533	2018-11-22 10:43:23	2018-11-22 10:43:26	MARIA Sus cesantias en el FNA pueden ser la primera cuota de una casa. En 2018 financiamos 9669 clientes como Ud. Quiere saber mas? SIN COSTO, responda SI o NO	Pendiente	2018-11-22	2018-11-22
2793181	7182390	AM	3132962566	2018-11-22 10:43:23	2018-11-22 10:43:26	Sus cesantias en el FNA pueden ser la primera cuota de una casa. En 2018 financiamos 9669 clientes como Ud. Quiere saber mas? SIN COSTO, responda SI o NO	Pendiente	2018-11-22	2018-11-22
2794915	56095744	AM	3213282252	2018-11-22 10:43:23	2018-11-22 10:43:26	LISNEIDA Sus cesantias en el FNA pueden ser la primera cuota de una casa para su familia. Quiere saber mas? SIN COSTO, responda SI o NO	Pendiente	2018-11-22	2018-11-22
2803360	16283196	AM	3114042288	2018-11-22 10:43:23	2018-11-22 10:43:26	SIGIFREDO Sea propietario! Sus cesantias en el FNA pueden ser la primera cuota de una casa. Quiere saber mas? SIN COSTO, responda SI o NO	Pendiente	2018-11-22	2018-11-22
2806932	39058626	AM	3165433626	2018-11-22 10:43:23	2018-11-22 10:44:24	MADELEINE Sus cesantias en el FNA pueden ser la primera cuota de una casa en SANTA MARTA. Quiere saber mas? SIN COSTO, responda SI o NO	SI	2018-11-22	2018-11-22	Muchas gracias por su respuesta. Un asesor del fondo Nacional del Ahorro se comunicara con usted.
2817065	36314146	AM	3212231391	2018-11-22 10:43:23	2018-11-22 10:43:26	Sea propietario! Sus cesantias en el FNA pueden ser la primera cuota de una casa. Quiere saber mas? SIN COSTO, responda SI o NO	Pendiente	2018-11-22	2018-11-22
2838361	40023857	AM	3124948207	2018-11-22 10:43:23	2018-11-22 10:45:34	Sus cesantias en el FNA pueden ser la primera cuota de una casa. Hay subsidios disponibles, preguntelos. Quiere saber mas? SIN COSTO, responda SI o NO	SI	2018-11-22	2018-11-22	Muchas gracias por su respuesta. Un asesor del fondo Nacional del Ahorro se comunicara con usted.
2838704	63495095	AM	3182823048	2018-11-22 10:43:23	2018-11-22 10:43:26	Sus cesantias en el FNA pueden ser la primera cuota de una casa para su familia. Quiere saber mas? SIN COSTO, responda SI o NO	Pendiente	2018-11-22	2018-11-22
2850541	9021038	AM	3004000391	2018-11-22 10:43:23	2018-11-22 10:43:26	CARLOS Sus cesantias en el FNA pueden ser la primera cuota de una casa. Hay subsidios disponibles, preguntelos. Quiere saber mas? SIN COSTO, responda SI o NO	Pendiente	2018-11-22	2018-11-22
4256348	71779301	AM	3155104787	2018-11-22 10:43:23	2018-11-22 10:43:26	CARLOS Sea propietario! Sus cesantias en el FNA pueden ser la primera cuota de una casa. Quiere saber mas? SIN COSTO, responda SI o NO	Pendiente	2018-11-22	2018-11-22
4258885	40442914	AM	3118812649	2018-11-22 10:43:23	2018-11-22 10:43:26	Sea propietario! Sus cesantias en el FNA pueden ser la primera cuota de una casa. Quiere saber mas? SIN COSTO, responda SI o NO	Pendiente	2018-11-22	2018-11-22
4265175	57434634	AM	3106154958	2018-11-22 10:43:23	2018-11-22 13:17:35	Sus cesantias en el FNA pueden ser la primera cuota de una casa. Quiere saber mas? SIN COSTO, responda SI o NO	SI	2018-11-22	2018-11-22	Muchas gracias por su respuesta. Un asesor del fondo Nacional del Ahorro se comunicara con usted.
4273388	16582869	AM	3163275539	2018-11-22 10:43:23	2018-11-22 10:43:26	JUAN No deje pasar el tiempo. Sus cesantias en el FNA pueden ser la primera cuota de una casa. Quiere saber mas? SIN COSTO, responda SI o NO	Pendiente	2018-11-22	2018-11-22
4279781	43749188	AM	3108398461	2018-11-22 10:43:23	2018-11-22 10:43:26	DIGNORY No deje pasar el tiempo. Sus cesantias en el FNA pueden ser la primera cuota de una casa. Quiere saber mas? SIN COSTO, responda SI o NO	Pendiente	2018-11-22	2018-11-22
4281065	1017154383	AM	3155117292	2018-11-22 10:43:23	2018-11-22 10:43:26	ANNI Sus cesantias en el FNA pueden ser la primera cuota de una casa. Hay subsidios disponibles, preguntelos. Quiere saber mas? SIN COSTO, responda SI o NO	Pendiente	2018-11-22	2018-11-22
4286123	88266361	AM	3203402025	2018-11-22 10:43:23	2018-11-22 10:44:03	JOSE Sus cesantias en el FNA pueden ser la primera cuota de una casa. En 2018 financiamos 9669 clientes como Ud. Quiere saber mas? SIN COSTO, responda SI o NO	SI	2018-11-22	2018-11-22	Muchas gracias por su respuesta. Un asesor del fondo Nacional del Ahorro se comunicara con usted.
4286958	71385193	AM	3003304789	2018-11-22 10:43:23	2018-11-22 13:41:09	Sus cesantias en el FNA pueden ser la primera cuota de una casa para su familia. Quiere saber mas? SIN COSTO, responda SI o NO	SI	2018-11-22	2018-11-22	Muchas gracias por su respuesta. Un asesor del fondo Nacional del Ahorro se comunicara con usted.
4289759	10003491	AM	3108243368	2018-11-22 10:43:23	2018-11-22 10:43:26	Sus cesantias en el FNA pueden ser la primera cuota de una casa en CALI. Quiere saber mas? SIN COSTO, responda SI o NO	Pendiente	2018-11-22	2018-11-22
4294220	32753142	AM	3135676538	2018-11-22 10:43:23	2018-11-22 10:43:26	Sus cesantias en el FNA pueden ser la primera cuota de una casa. En 2018 financiamos 9669 clientes como Ud. Quiere saber mas? SIN COSTO, responda SI o NO	Pendiente	2018-11-22	2018-11-22
4303495	67002154	AM	3162552768	2018-11-22 10:43:23	2018-11-22 10:43:26	Sus cesantias en el FNA pueden ser la primera cuota de una casa. Hay subsidios disponibles, preguntelos. Quiere saber mas? SIN COSTO, responda SI o NO	Pendiente	2018-11-22	2018-11-22
4309570	3033240	AM	3108621636	2018-11-22 10:43:23	2018-11-22 10:43:26	MANUEL Sea propietario! Sus cesantias en el FNA pueden ser la primera cuota de una casa. Quiere saber mas? SIN COSTO, responda SI o NO	Pendiente	2018-11-22	2018-11-22
4312369	87530645	AM	3155800091	2018-11-22 10:43:23	2018-11-22 10:43:26	No deje pasar el tiempo. Sus cesantias en el FNA pueden ser la primera cuota de una casa. Quiere saber mas? SIN COSTO, responda SI o NO	Pendiente	2018-11-22	2018-11-22
4315571	37397942	AM	3112496000	2018-11-22 10:43:23	2018-11-22 10:43:26	Sus cesantias en el FNA pueden ser la primera cuota de una casa. Quiere saber mas? SIN COSTO, responda SI o NO	Pendiente	2018-11-22	2018-11-22
4319356	71661325	AM	3182635980	2018-11-22 10:43:23	2018-11-22 10:43:26	EDGAR Sus cesantias en el FNA pueden ser la primera cuota de una casa para su familia. Quiere saber mas? SIN COSTO, responda SI o NO	Pendiente	2018-11-22	2018-11-22
4321608	15923592	AM	3216457892	2018-11-22 10:43:23	2018-11-22 10:43:26	Sus cesantias en el FNA pueden ser la primera cuota de una casa en MANIZALES. Quiere saber mas? SIN COSTO, responda SI o NO	Pendiente	2018-11-22	2018-11-22
4323505	52386370	AM	3118485987	2018-11-22 10:43:23	2018-11-22 10:43:26	PATRICIA Sus cesantias en el FNA pueden ser la primera cuota de una casa. Hay subsidios disponibles, preguntelos. Quiere saber mas? SIN COSTO, responda SI o NO	Pendiente	2018-11-22	2018-11-22
5933029	1098662146	AM	3502461181	2018-11-22 10:43:23	2018-11-22 13:21:08	EDWARD Sus cesantias en el FNA pueden ser la primera cuota de una casa para su familia. Quiere saber mas? SIN COSTO, responda SI o NO	SI	2018-11-22	2018-11-22	Muchas gracias por su respuesta. Un asesor del fondo Nacional del Ahorro se comunicara con usted.
5933511	67032811	AM	3123784224	2018-11-22 10:43:23	2018-11-22 10:43:26	Sea propietario! Sus cesantias en el FNA pueden ser la primera cuota de una casa. Quiere saber mas? SIN COSTO, responda SI o NO	Pendiente	2018-11-22	2018-11-22
5934702	41926513	AM	3212681062	2018-11-22 10:43:23	2018-11-22 10:43:26	SONIA Sus cesantias en el FNA pueden ser la primera cuota de una casa para su familia. Quiere saber mas? SIN COSTO, responda SI o NO	Pendiente	2018-11-22	2018-11-22
5961304	38364473	AM	3152925787	2018-11-22 10:43:23	2018-11-22 10:43:26	Sus cesantias en el FNA pueden ser la primera cuota de una casa en IBAGUE. Quiere saber mas? SIN COSTO, responda SI o NO	Pendiente	2018-11-22	2018-11-22
5985772	29568758	AM	3128643566	2018-11-22 10:43:23	2018-11-22 10:43:26	ASTRID Sus cesantias en el FNA pueden ser la primera cuota de una casa para su familia. Quiere saber mas? SIN COSTO, responda SI o NO	Pendiente	2018-11-22	2018-11-22
5987274	16673447	AM	3155206236	2018-11-22 10:43:23	2018-11-22 10:43:26	FERNANDO Sus cesantias en el FNA pueden ser la primera cuota de una casa en CALI. Quiere saber mas? SIN COSTO, responda SI o NO	Pendiente	2018-11-22	2018-11-22
5996547	94447317	AM	3184278611	2018-11-22 10:43:23	2018-11-22 10:43:26	MILTON Sus cesantias en el FNA pueden ser la primera cuota de una casa. Hay subsidios disponibles, preguntelos. Quiere saber mas? SIN COSTO, responda SI o NO	Pendiente	2018-11-22	2018-11-22
6000594	36179213	AM	3183892454	2018-11-22 10:43:23	2018-11-22 10:43:26	Sea propietario! Sus cesantias en el FNA pueden ser la primera cuota de una casa. Quiere saber mas? SIN COSTO, responda SI o NO	Pendiente	2018-11-22	2018-11-22
6015586	8192593	AM	3218942348	2018-11-22 10:43:23	2018-11-22 10:43:26	JORGE Sus cesantias en el FNA pueden ser la primera cuota de una casa. En 2018 financiamos 9669 clientes como Ud. Quiere saber mas? SIN COSTO, responda SI o NO	Pendiente	2018-11-22	2018-11-22
7711698	91270882	AM	3163043031	2018-11-22 10:43:23	2018-11-22 10:43:26	EDWIN No deje pasar el tiempo. Sus cesantias en el FNA pueden ser la primera cuota de una casa. Quiere saber mas? SIN COSTO, responda SI o NO	Pendiente	2018-11-22	2018-11-22
7722857	31973077	AM	3175764595	2018-11-22 10:43:23	2018-11-22 10:44:17	Sus cesantias en el FNA pueden ser la primera cuota de una casa. Hay subsidios disponibles, preguntelos. Quiere saber mas? SIN COSTO, responda SI o NO	SI	2018-11-22	2018-11-22	Muchas gracias por su respuesta. Un asesor del fondo Nacional del Ahorro se comunicara con usted.
7978682	32726587	AM	3008041846	2018-11-22 10:43:23	2018-11-22 10:43:26	VERA Sus cesantias en el FNA pueden ser la primera cuota de una casa para su familia. Quiere saber mas? SIN COSTO, responda SI o NO	Pendiente	2018-11-22	2018-11-22
8141327	73144232	AM	3173770422	2018-11-22 10:43:23	2018-11-22 10:43:26	Sea propietario! Sus cesantias en el FNA pueden ser la primera cuota de una casa. Quiere saber mas? SIN COSTO, responda SI o NO	Pendiente	2018-11-22	2018-11-22
8148367	42889605	AM	3147583503	2018-11-22 10:43:23	2018-11-22 10:43:26	Sus cesantias en el FNA pueden ser la primera cuota de una casa en MEDELLIN. Quiere saber mas? SIN COSTO, responda SI o NO	Pendiente	2018-11-22	2018-11-22
8392407	75144420	AM	3148905249	2018-11-22 10:43:23	2018-11-22 10:43:26	Sus cesantias en el FNA pueden ser la primera cuota de una casa. Quiere saber mas? SIN COSTO, responda SI o NO	Pendiente	2018-11-22	2018-11-22
615664	40373139	AM	3107772996	2018-11-22 10:43:23	2018-11-22 10:43:26	GRACIELA Sus cesantias en el FNA pueden ser la primera cuota de una casa para su familia. Quiere saber mas? SIN COSTO, responda SI o NO	Pendiente	2018-11-22	2018-11-22
617143	12998832	AM	3122557776	2018-11-22 10:43:23	2018-11-22 10:43:26	Sea propietario! Sus cesantias en el FNA pueden ser la primera cuota de una casa. Quiere saber mas? SIN COSTO, responda SI o NO	Pendiente	2018-11-22	2018-11-22
618406	4191057	AM	3115609985	2018-11-22 10:43:23	2018-11-22 10:43:26	JOSE Sus cesantias en el FNA pueden ser la primera cuota de una casa. Hay subsidios disponibles, preguntelos. Quiere saber mas? SIN COSTO, responda SI o NO	Pendiente	2018-11-22	2018-11-22
618757	60360244	AM	3158276114	2018-11-22 10:43:23	2018-11-22 10:43:26	YENNY Sus cesantias en el FNA pueden ser la primera cuota de una casa. En 2018 financiamos 9669 clientes como Ud. Quiere saber mas? SIN COSTO, responda SI o NO	Pendiente	2018-11-22	2018-11-22
620157	87490651	AM	3107112574	2018-11-22 10:43:23	2018-11-22 10:43:26	Sus cesantias en el FNA pueden ser la primera cuota de una casa en BARRANQUILLA. Quiere saber mas? SIN COSTO, responda SI o NO	Pendiente	2018-11-22	2018-11-22
621181	45494640	AM	3003172714	2018-11-22 10:43:23	2018-11-22 10:43:26	LUZ Sus cesantias en el FNA pueden ser la primera cuota de una casa. Hay subsidios disponibles, preguntelos. Quiere saber mas? SIN COSTO, responda SI o NO	Pendiente	2018-11-22	2018-11-22
621475	38944198	AM	3116089419	2018-11-22 10:43:23	2018-11-22 10:43:26	MARICEL Sus cesantias en el FNA pueden ser la primera cuota de una casa. En 2018 financiamos 9669 clientes como Ud. Quiere saber mas? SIN COSTO, responda SI o NO	Pendiente	2018-11-22	2018-11-22
626355	93382131	AM	3112306497	2018-11-22 10:43:23	2018-11-22 10:43:26	JORGE Sus cesantias en el FNA pueden ser la primera cuota de una casa. En 2018 financiamos 9669 clientes como Ud. Quiere saber mas? SIN COSTO, responda SI o NO	Pendiente	2018-11-22	2018-11-22
626888	21240788	AM	3132538731	2018-11-22 10:43:23	2018-11-22 10:43:26	Sus cesantias en el FNA pueden ser la primera cuota de una casa en VILLAVICENCIO. Quiere saber mas? SIN COSTO, responda SI o NO	Pendiente	2018-11-22	2018-11-22
628562	28954726	AM	3178480654	2018-11-22 10:43:23	2018-11-22 10:43:26	Sus cesantias en el FNA pueden ser la primera cuota de una casa en IBAGUE. Quiere saber mas? SIN COSTO, responda SI o NO	Pendiente	2018-11-22	2018-11-22
628808	21769906	AM	3104060442	2018-11-22 10:43:23	2018-11-22 10:43:26	SANDRA Sus cesantias en el FNA pueden ser la primera cuota de una casa. Hay subsidios disponibles, preguntelos. Quiere saber mas? SIN COSTO, responda SI o NO	Pendiente	2018-11-22	2018-11-22
629421	70138575	AM	3112815628	2018-11-22 10:43:23	2018-11-22 10:43:26	No deje pasar el tiempo. Sus cesantias en el FNA pueden ser la primera cuota de una casa. Quiere saber mas? SIN COSTO, responda SI o NO	Pendiente	2018-11-22	2018-11-22
629451	34547888	AM	3155474534	2018-11-22 10:43:23	2018-11-22 10:43:26	Sus cesantias en el FNA pueden ser la primera cuota de una casa. Quiere saber mas? SIN COSTO, responda SI o NO	Pendiente	2018-11-22	2018-11-22
629874	71663326	AM	3015711871	2018-11-22 10:43:23	2018-11-22 10:43:26	Sus cesantias en el FNA pueden ser la primera cuota de una casa. Hay subsidios disponibles, preguntelos. Quiere saber mas? SIN COSTO, responda SI o NO	Pendiente	2018-11-22	2018-11-22
630898	60356052	AM	3126540269	2018-11-22 10:43:23	2018-11-22 10:43:26	LUZ Sus cesantias en el FNA pueden ser la primera cuota de una casa. Hay subsidios disponibles, preguntelos. Quiere saber mas? SIN COSTO, responda SI o NO	Pendiente	2018-11-22	2018-11-22
631257	51784270	AM	3104421013	2018-11-22 10:43:23	2018-11-22 10:43:26	Sus cesantias en el FNA pueden ser la primera cuota de una casa. Hay subsidios disponibles, preguntelos. Quiere saber mas? SIN COSTO, responda SI o NO	Pendiente	2018-11-22	2018-11-22
633845	34538295	AM	3166530574	2018-11-22 10:43:23	2018-11-22 10:43:26	Sus cesantias en el FNA pueden ser la primera cuota de una casa en POPAYAN. Quiere saber mas? SIN COSTO, responda SI o NO	Pendiente	2018-11-22	2018-11-22
635197	40390706	AM	3118400093	2018-11-22 10:43:23	2018-11-22 10:43:26	Sus cesantias en el FNA pueden ser la primera cuota de una casa. Hay subsidios disponibles, preguntelos. Quiere saber mas? SIN COSTO, responda SI o NO	Pendiente	2018-11-22	2018-11-22
639293	32665046	AM	3103609451	2018-11-22 10:43:23	2018-11-22 10:43:26	No deje pasar el tiempo. Sus cesantias en el FNA pueden ser la primera cuota de una casa. Quiere saber mas? SIN COSTO, responda SI o NO	Pendiente	2018-11-22	2018-11-22
640113	40383838	AM	3133465090	2018-11-22 10:43:23	2018-11-22 10:43:26	Sus cesantias en el FNA pueden ser la primera cuota de una casa. En 2018 financiamos 9669 clientes como Ud. Quiere saber mas? SIN COSTO, responda SI o NO	Pendiente	2018-11-22	2018-11-22
641013	43561073	AM	3137420315	2018-11-22 10:43:23	2018-11-22 10:43:26	Sus cesantias en el FNA pueden ser la primera cuota de una casa para su familia. Quiere saber mas? SIN COSTO, responda SI o NO	Pendiente	2018-11-22	2018-11-22
641768	43024801	AM	3014371877	2018-11-22 10:43:23	2018-11-22 10:43:26	Sus cesantias en el FNA pueden ser la primera cuota de una casa en MEDELLIN. Quiere saber mas? SIN COSTO, responda SI o NO	Pendiente	2018-11-22	2018-11-22
642490	88229436	AM	3125873697	2018-11-22 10:43:23	2018-11-22 10:43:26	Sus cesantias en el FNA pueden ser la primera cuota de una casa. Hay subsidios disponibles, preguntelos. Quiere saber mas? SIN COSTO, responda SI o NO	Pendiente	2018-11-22	2018-11-22
642949	74081419	AM	3102195124	2018-11-22 10:43:23	2018-11-22 10:43:26	Sus cesantias en el FNA pueden ser la primera cuota de una casa. Quiere saber mas? SIN COSTO, responda SI o NO	Pendiente	2018-11-22	2018-11-22
648317	25278750	AM	3006508809	2018-11-22 10:43:23	2018-11-22 10:43:26	Sus cesantias en el FNA pueden ser la primera cuota de una casa. En 2018 financiamos 9669 clientes como Ud. Quiere saber mas? SIN COSTO, responda SI o NO	Pendiente	2018-11-22	2018-11-22
653558	27898900	AM	3124353220	2018-11-22 10:43:23	2018-11-22 10:43:26	ROSA Sus cesantias en el FNA pueden ser la primera cuota de una casa. En 2018 financiamos 9669 clientes como Ud. Quiere saber mas? SIN COSTO, responda SI o NO	Pendiente	2018-11-22	2018-11-22
656569	6774119	AM	3103490318	2018-11-22 10:43:23	2018-11-22 10:43:26	HUGO Sus cesantias en el FNA pueden ser la primera cuota de una casa. En 2018 financiamos 9669 clientes como Ud. Quiere saber mas? SIN COSTO, responda SI o NO	Pendiente	2018-11-22	2018-11-22
658021	15930394	AM	3147461333	2018-11-22 10:43:23	2018-11-22 10:43:26	Sus cesantias en el FNA pueden ser la primera cuota de una casa. Hay subsidios disponibles, preguntelos. Quiere saber mas? SIN COSTO, responda SI o NO	Pendiente	2018-11-22	2018-11-22
659184	57426682	AM	3046627980	2018-11-22 10:43:23	2018-11-22 10:43:26	Sus cesantias en el FNA pueden ser la primera cuota de una casa. Quiere saber mas? SIN COSTO, responda SI o NO	Pendiente	2018-11-22	2018-11-22
660807	4287725	AM	3118055031	2018-11-22 10:43:23	2018-11-22 10:43:26	No deje pasar el tiempo. Sus cesantias en el FNA pueden ser la primera cuota de una casa. Quiere saber mas? SIN COSTO, responda SI o NO	Pendiente	2018-11-22	2018-11-22
661755	33109544	AM	3013363102	2018-11-22 10:43:23	2018-11-22 10:43:26	LUX Sus cesantias en el FNA pueden ser la primera cuota de una casa en CARTAGENA. Quiere saber mas? SIN COSTO, responda SI o NO	Pendiente	2018-11-22	2018-11-22
663442	73126128	AM	3156809885	2018-11-22 10:43:23	2018-11-22 10:43:26	Sea propietario! Sus cesantias en el FNA pueden ser la primera cuota de una casa. Quiere saber mas? SIN COSTO, responda SI o NO	Pendiente	2018-11-22	2018-11-22
664480	45518056	AM	3107023979	2018-11-22 10:43:23	2018-11-22 10:43:26	YANIDES Sea propietario! Sus cesantias en el FNA pueden ser la primera cuota de una casa. Quiere saber mas? SIN COSTO, responda SI o NO	Pendiente	2018-11-22	2018-11-22
665453	34511528	AM	3158156156	2018-11-22 10:43:23	2018-11-22 10:43:26	No deje pasar el tiempo. Sus cesantias en el FNA pueden ser la primera cuota de una casa. Quiere saber mas? SIN COSTO, responda SI o NO	Pendiente	2018-11-22	2018-11-22
666213	31860421	AM	3146801030	2018-11-22 10:43:23	2018-11-22 10:43:26	GLORIA Sus cesantias en el FNA pueden ser la primera cuota de una casa en CALI. Quiere saber mas? SIN COSTO, responda SI o NO	Pendiente	2018-11-22	2018-11-22
667182	27090777	AM	3226136180	2018-11-22 10:43:23	2018-11-22 10:43:26	Sus cesantias en el FNA pueden ser la primera cuota de una casa. En 2018 financiamos 9669 clientes como Ud. Quiere saber mas? SIN COSTO, responda SI o NO	Pendiente	2018-11-22	2018-11-22
667627	31302465	AM	3205422340	2018-11-22 10:43:23	2018-11-22 10:43:26	Sus cesantias en el FNA pueden ser la primera cuota de una casa. Hay subsidios disponibles, preguntelos. Quiere saber mas? SIN COSTO, responda SI o NO	Pendiente	2018-11-22	2018-11-22
1523154	16111870	AM	3163301375	2018-11-22 10:43:23	2018-11-22 10:48:43	Sus cesantias en el FNA pueden ser la primera cuota de una casa. En 2018 financiamos 9669 clientes como Ud. Quiere saber mas? SIN COSTO, responda SI o NO	SI	2018-11-22	2018-11-22	Muchas gracias por su respuesta. Un asesor del fondo Nacional del Ahorro se comunicara con usted.
1539045	65781554	AM	3204203938	2018-11-22 10:43:23	2018-11-22 10:43:26	Sus cesantias en el FNA pueden ser la primera cuota de una casa para su familia. Quiere saber mas? SIN COSTO, responda SI o NO	Pendiente	2018-11-22	2018-11-22
1540067	45557300	AM	3008180265	2018-11-22 10:43:23	2018-11-22 10:43:27	Sea propietario! Sus cesantias en el FNA pueden ser la primera cuota de una casa. Quiere saber mas? SIN COSTO, responda SI o NO	Pendiente	2018-11-22	2018-11-22
1556375	31202775	AM	3127753654	2018-11-22 10:43:23	2018-11-22 10:43:27	Sus cesantias en el FNA pueden ser la primera cuota de una casa para su familia. Quiere saber mas? SIN COSTO, responda SI o NO	Pendiente	2018-11-22	2018-11-22
1570086	79187294	AM	3133760998	2018-11-22 10:43:23	2018-11-22 10:43:27	JUNER Sus cesantias en el FNA pueden ser la primera cuota de una casa. En 2018 financiamos 9669 clientes como Ud. Quiere saber mas? SIN COSTO, responda SI o NO	Pendiente	2018-11-22	2018-11-22
1579328	21188579	AM	3134614794	2018-11-22 10:43:23	2018-11-22 10:43:27	Sus cesantias en el FNA pueden ser la primera cuota de una casa en VILLAVICENCIO. Quiere saber mas? SIN COSTO, responda SI o NO	Pendiente	2018-11-22	2018-11-22
1580863	30303524	AM	3154904795	2018-11-22 10:43:23	2018-11-22 10:43:27	Sus cesantias en el FNA pueden ser la primera cuota de una casa. En 2018 financiamos 9669 clientes como Ud. Quiere saber mas? SIN COSTO, responda SI o NO	Pendiente	2018-11-22	2018-11-22
1586194	16073455	AM	3103887717	2018-11-22 10:43:23	2018-11-22 10:43:27	Sus cesantias en el FNA pueden ser la primera cuota de una casa para su familia. Quiere saber mas? SIN COSTO, responda SI o NO	Pendiente	2018-11-22	2018-11-22
1595800	24866602	AM	3006658087	2018-11-22 10:43:23	2018-11-22 10:43:27	MARIA Sus cesantias en el FNA pueden ser la primera cuota de una casa para su familia. Quiere saber mas? SIN COSTO, responda SI o NO	Pendiente	2018-11-22	2018-11-22
1596814	40935472	AM	3016724092	2018-11-22 10:43:23	2018-11-22 10:43:27	ANDREA Sus cesantias en el FNA pueden ser la primera cuota de una casa para su familia. Quiere saber mas? SIN COSTO, responda SI o NO	Pendiente	2018-11-22	2018-11-22
1596901	71742745	AM	3113131564	2018-11-22 10:43:23	2018-11-22 11:20:55	LUIS No deje pasar el tiempo. Sus cesantias en el FNA pueden ser la primera cuota de una casa. Quiere saber mas? SIN COSTO, responda SI o NO	NO	2018-11-22	2018-11-22	Muchas gracias por su respuesta. Un asesor del fondo Nacional del Ahorro se comunicara con usted.
3042668	71668333	AM	3003250238	2018-11-22 10:43:23	2018-11-22 10:43:27	Sea propietario! Sus cesantias en el FNA pueden ser la primera cuota de una casa. Quiere saber mas? SIN COSTO, responda SI o NO	Pendiente	2018-11-22	2018-11-22
3046096	7142090	AM	3126089050	2018-11-22 10:43:23	2018-11-22 10:43:27	Sus cesantias en el FNA pueden ser la primera cuota de una casa en SANTA MARTA. Quiere saber mas? SIN COSTO, responda SI o NO	Pendiente	2018-11-22	2018-11-22
3047447	16716445	AM	3016426635	2018-11-22 10:43:23	2018-11-22 13:25:33	Sus cesantias en el FNA pueden ser la primera cuota de una casa. En 2018 financiamos 9669 clientes como Ud. Quiere saber mas? SIN COSTO, responda SI o NO	SI	2018-11-22	2018-11-22	Muchas gracias por su respuesta. Un asesor del fondo Nacional del Ahorro se comunicara con usted.
3050735	91500105	AM	3143105977	2018-11-22 10:43:23	2018-11-22 10:43:27	Sus cesantias en el FNA pueden ser la primera cuota de una casa para su familia. Quiere saber mas? SIN COSTO, responda SI o NO	Pendiente	2018-11-22	2018-11-22
3053104	63531685	AM	3158016492	2018-11-22 10:43:23	2018-11-22 10:43:27	LYDA Sus cesantias en el FNA pueden ser la primera cuota de una casa para su familia. Quiere saber mas? SIN COSTO, responda SI o NO	Pendiente	2018-11-22	2018-11-22
3053174	31571505	AM	3183744758	2018-11-22 10:43:23	2018-11-22 10:43:27	NUBIA Sus cesantias en el FNA pueden ser la primera cuota de una casa. En 2018 financiamos 9669 clientes como Ud. Quiere saber mas? SIN COSTO, responda SI o NO	Pendiente	2018-11-22	2018-11-22
3056607	16276772	AM	3108915694	2018-11-22 10:43:23	2018-11-22 10:43:27	Sus cesantias en el FNA pueden ser la primera cuota de una casa en CALI. Quiere saber mas? SIN COSTO, responda SI o NO	Pendiente	2018-11-22	2018-11-22
3060745	34544247	AM	3174650118	2018-11-22 10:43:23	2018-11-22 10:43:27	NANCY Sus cesantias en el FNA pueden ser la primera cuota de una casa en POPAYAN. Quiere saber mas? SIN COSTO, responda SI o NO	Pendiente	2018-11-22	2018-11-22
3065538	98341959	AM	3146657297	2018-11-22 10:43:23	2018-11-22 10:43:27	Sus cesantias en el FNA pueden ser la primera cuota de una casa para su familia. Quiere saber mas? SIN COSTO, responda SI o NO	Pendiente	2018-11-22	2018-11-22
3077550	42114157	AM	3216417677	2018-11-22 10:43:23	2018-11-22 10:43:27	Sus cesantias en el FNA pueden ser la primera cuota de una casa. Hay subsidios disponibles, preguntelos. Quiere saber mas? SIN COSTO, responda SI o NO	Pendiente	2018-11-22	2018-11-22
3090444	15363439	AM	3012081878	2018-11-22 10:43:23	2018-11-22 10:43:27	Sea propietario! Sus cesantias en el FNA pueden ser la primera cuota de una casa. Quiere saber mas? SIN COSTO, responda SI o NO	Pendiente	2018-11-22	2018-11-22
3103582	63525542	AM	3178916084	2018-11-22 10:43:23	2018-11-22 10:43:27	No deje pasar el tiempo. Sus cesantias en el FNA pueden ser la primera cuota de una casa. Quiere saber mas? SIN COSTO, responda SI o NO	Pendiente	2018-11-22	2018-11-22
3109605	38872314	AM	3135849771	2018-11-22 10:43:23	2018-11-22 10:43:27	GLORIA Sea propietario! Sus cesantias en el FNA pueden ser la primera cuota de una casa. Quiere saber mas? SIN COSTO, responda SI o NO	Pendiente	2018-11-22	2018-11-22
3111481	51985699	AM	3115899979	2018-11-22 10:43:23	2018-11-22 10:43:27	CLAUDIA Sus cesantias en el FNA pueden ser la primera cuota de una casa para su familia. Quiere saber mas? SIN COSTO, responda SI o NO	Pendiente	2018-11-22	2018-11-22
3115033	12436989	AM	3162709163	2018-11-22 10:43:23	2018-11-22 10:43:27	Sus cesantias en el FNA pueden ser la primera cuota de una casa. Hay subsidios disponibles, preguntelos. Quiere saber mas? SIN COSTO, responda SI o NO	Pendiente	2018-11-22	2018-11-22
3120398	34570911	AM	3174295166	2018-11-22 10:43:23	2018-11-22 10:43:27	SONIA No deje pasar el tiempo. Sus cesantias en el FNA pueden ser la primera cuota de una casa. Quiere saber mas? SIN COSTO, responda SI o NO	Pendiente	2018-11-22	2018-11-22
3123910	30402705	AM	3117474126	2018-11-22 10:43:23	2018-11-22 10:43:27	Sea propietario! Sus cesantias en el FNA pueden ser la primera cuota de una casa. Quiere saber mas? SIN COSTO, responda SI o NO	Pendiente	2018-11-22	2018-11-22
3124159	27167599	AM	3155396723	2018-11-22 10:43:23	2018-11-22 10:43:27	GENITH Sus cesantias en el FNA pueden ser la primera cuota de una casa. Hay subsidios disponibles, preguntelos. Quiere saber mas? SIN COSTO, responda SI o NO	Pendiente	2018-11-22	2018-11-22
3124303	9293815	AM	3008306357	2018-11-22 10:43:23	2018-11-22 10:43:27	ANDRES No deje pasar el tiempo. Sus cesantias en el FNA pueden ser la primera cuota de una casa. Quiere saber mas? SIN COSTO, responda SI o NO	Pendiente	2018-11-22	2018-11-22
3124776	5825252	AM	3164119044	2018-11-22 10:43:23	2018-11-22 10:43:27	Sus cesantias en el FNA pueden ser la primera cuota de una casa. Quiere saber mas? SIN COSTO, responda SI o NO	Pendiente	2018-11-22	2018-11-22
3130849	71656805	AM	3104339012	2018-11-22 10:43:23	2018-11-22 10:43:27	JOHNY Sus cesantias en el FNA pueden ser la primera cuota de una casa para su familia. Quiere saber mas? SIN COSTO, responda SI o NO	Pendiente	2018-11-22	2018-11-22
4595766	66808387	AM	3186102889	2018-11-22 10:43:23	2018-11-22 10:43:27	CLARA Sea propietario! Sus cesantias en el FNA pueden ser la primera cuota de una casa. Quiere saber mas? SIN COSTO, responda SI o NO	Pendiente	2018-11-22	2018-11-22
4599568	60345854	AM	3002772831	2018-11-22 10:43:23	2018-11-22 10:43:27	CLAUDIA No deje pasar el tiempo. Sus cesantias en el FNA pueden ser la primera cuota de una casa. Quiere saber mas? SIN COSTO, responda SI o NO	Pendiente	2018-11-22	2018-11-22
4602367	38241006	AM	3213107503	2018-11-22 10:43:23	2018-11-22 10:43:27	No deje pasar el tiempo. Sus cesantias en el FNA pueden ser la primera cuota de una casa. Quiere saber mas? SIN COSTO, responda SI o NO	Pendiente	2018-11-22	2018-11-22
4617533	1129566814	AM	3187825130	2018-11-22 10:43:23	2018-11-22 10:43:27	MARIA Sus cesantias en el FNA pueden ser la primera cuota de una casa. En 2018 financiamos 9669 clientes como Ud. Quiere saber mas? SIN COSTO, responda SI o NO	Pendiente	2018-11-22	2018-11-22
4631257	43747081	AM	3137442379	2018-11-22 10:43:23	2018-11-22 10:43:27	REINA Sea propietario! Sus cesantias en el FNA pueden ser la primera cuota de una casa. Quiere saber mas? SIN COSTO, responda SI o NO	Pendiente	2018-11-22	2018-11-22
4636031	3513727	AM	3137118385	2018-11-22 10:43:23	2018-11-22 10:43:27	Sus cesantias en el FNA pueden ser la primera cuota de una casa para su familia. Quiere saber mas? SIN COSTO, responda SI o NO	Pendiente	2018-11-22	2018-11-22
4645775	36860865	AM	3172254343	2018-11-22 10:43:23	2018-11-22 10:43:27	GLORIA Sus cesantias en el FNA pueden ser la primera cuota de una casa. En 2018 financiamos 9669 clientes como Ud. Quiere saber mas? SIN COSTO, responda SI o NO	Pendiente	2018-11-22	2018-11-22
4658235	79975899	AM	3153166496	2018-11-22 10:43:23	2018-11-22 10:43:27	Sus cesantias en el FNA pueden ser la primera cuota de una casa en SOGAMOSO. Quiere saber mas? SIN COSTO, responda SI o NO	Pendiente	2018-11-22	2018-11-22
4661598	43977575	AM	3003742401	2018-11-22 10:43:23	2018-11-22 10:43:27	LUISA Sus cesantias en el FNA pueden ser la primera cuota de una casa. Hay subsidios disponibles, preguntelos. Quiere saber mas? SIN COSTO, responda SI o NO	Pendiente	2018-11-22	2018-11-22
4670096	40436223	AM	3208008906	2018-11-22 10:43:23	2018-11-22 10:43:27	Sus cesantias en el FNA pueden ser la primera cuota de una casa. Hay subsidios disponibles, preguntelos. Quiere saber mas? SIN COSTO, responda SI o NO	Pendiente	2018-11-22	2018-11-22
4680985	98393429	AM	3017558016	2018-11-22 10:43:23	2018-11-22 10:43:27	FRANCISCO Sus cesantias en el FNA pueden ser la primera cuota de una casa. Hay subsidios disponibles, preguntelos. Quiere saber mas? SIN COSTO, responda SI o NO	Pendiente	2018-11-22	2018-11-22
4684603	38560587	AM	3136952474	2018-11-22 10:43:23	2018-11-22 10:43:27	ANDREA Sus cesantias en el FNA pueden ser la primera cuota de una casa. Hay subsidios disponibles, preguntelos. Quiere saber mas? SIN COSTO, responda SI o NO	Pendiente	2018-11-22	2018-11-22
4688534	72268601	AM	3043434268	2018-11-22 10:43:23	2018-11-22 10:43:27	Sus cesantias en el FNA pueden ser la primera cuota de una casa. Quiere saber mas? SIN COSTO, responda SI o NO	Pendiente	2018-11-22	2018-11-22
4692937	31887467	AM	3105036023	2018-11-22 10:43:23	2018-11-22 10:43:27	ADRIANA Sus cesantias en el FNA pueden ser la primera cuota de una casa. En 2018 financiamos 9669 clientes como Ud. Quiere saber mas? SIN COSTO, responda SI o NO	Pendiente	2018-11-22	2018-11-22
4697895	52219348	AM	3007867107	2018-11-22 10:43:23	2018-11-22 10:43:27	ADRIANA No deje pasar el tiempo. Sus cesantias en el FNA pueden ser la primera cuota de una casa. Quiere saber mas? SIN COSTO, responda SI o NO	Pendiente	2018-11-22	2018-11-22
6125836	1118544340	AM	3108049296	2018-11-22 10:43:23	2018-11-22 10:43:27	Sus cesantias en el FNA pueden ser la primera cuota de una casa. En 2018 financiamos 9669 clientes como Ud. Quiere saber mas? SIN COSTO, responda SI o NO	Pendiente	2018-11-22	2018-11-22
6143137	65780081	AM	3152498287	2018-11-22 10:43:23	2018-11-22 10:43:27	LOURDES Sea propietario! Sus cesantias en el FNA pueden ser la primera cuota de una casa. Quiere saber mas? SIN COSTO, responda SI o NO	Pendiente	2018-11-22	2018-11-22
6154114	40030261	AM	3157414917	2018-11-22 10:43:23	2018-11-22 10:43:27	CLAUDIA Sus cesantias en el FNA pueden ser la primera cuota de una casa para su familia. Quiere saber mas? SIN COSTO, responda SI o NO	Pendiente	2018-11-22	2018-11-22
6168632	33355689	AM	3003156284	2018-11-22 10:43:23	2018-11-22 10:43:27	No deje pasar el tiempo. Sus cesantias en el FNA pueden ser la primera cuota de una casa. Quiere saber mas? SIN COSTO, responda SI o NO	Pendiente	2018-11-22	2018-11-22
6175922	12698205	AM	3216979118	2018-11-22 10:43:23	2018-11-22 10:50:03	CARLOS Sus cesantias en el FNA pueden ser la primera cuota de una casa en CARTAGENA. Quiere saber mas? SIN COSTO, responda SI o NO	SI	2018-11-22	2018-11-22	Muchas gracias por su respuesta. Un asesor del fondo Nacional del Ahorro se comunicara con usted.
6180216	37514730	AM	3015812412	2018-11-22 10:43:23	2018-11-22 10:43:27	Sus cesantias en el FNA pueden ser la primera cuota de una casa. En 2018 financiamos 9669 clientes como Ud. Quiere saber mas? SIN COSTO, responda SI o NO	Pendiente	2018-11-22	2018-11-22
6183453	1047423591	AM	3012003724	2018-11-22 10:43:23	2018-11-22 10:43:27	Sus cesantias en el FNA pueden ser la primera cuota de una casa en SANTA MARTA. Quiere saber mas? SIN COSTO, responda SI o NO	Pendiente	2018-11-22	2018-11-22
6206813	45765779	AM	3106915606	2018-11-22 10:43:23	2018-11-22 10:44:25	Sus cesantias en el FNA pueden ser la primera cuota de una casa. En 2018 financiamos 9669 clientes como Ud. Quiere saber mas? SIN COSTO, responda SI o NO	SI	2018-11-22	2018-11-22	Muchas gracias por su respuesta. Un asesor del fondo Nacional del Ahorro se comunicara con usted.
6207297	74381079	AM	3144167618	2018-11-22 10:43:23	2018-11-22 12:12:03	Sea propietario! Sus cesantias en el FNA pueden ser la primera cuota de una casa. Quiere saber mas? SIN COSTO, responda SI o NO	SI	2018-11-22	2018-11-22	Muchas gracias por su respuesta. Un asesor del fondo Nacional del Ahorro se comunicara con usted.
6233729	72205769	AM	3126469917	2018-11-22 10:43:23	2018-11-22 10:43:27	LENIN No deje pasar el tiempo. Sus cesantias en el FNA pueden ser la primera cuota de una casa. Quiere saber mas? SIN COSTO, responda SI o NO	Pendiente	2018-11-22	2018-11-22
8972662	51805350	AM	3176568873	2018-11-22 10:43:23	2018-11-22 11:46:02	IVONNE Sus cesantias en el FNA pueden ser la primera cuota de una casa. En 2018 financiamos 9669 clientes como Ud. Quiere saber mas? SIN COSTO, responda SI o NO	SI	2018-11-22	2018-11-22	Muchas gracias por su respuesta. Un asesor del fondo Nacional del Ahorro se comunicara con usted.
8986948	6104351	AM	3024454624	2018-11-22 10:43:23	2018-11-22 10:44:33	Sus cesantias en el FNA pueden ser la primera cuota de una casa. Quiere saber mas? SIN COSTO, responda SI o NO	SI	2018-11-22	2018-11-22	Muchas gracias por su respuesta. Un asesor del fondo Nacional del Ahorro se comunicara con usted.
8993587	19358707	AM	3102459121	2018-11-22 10:43:23	2018-11-22 10:43:27	GONZALO Sus cesantias en el FNA pueden ser la primera cuota de una casa. En 2018 financiamos 9669 clientes como Ud. Quiere saber mas? SIN COSTO, responda SI o NO	Pendiente	2018-11-22	2018-11-22
8996274	16771459	AM	3148703660	2018-11-22 10:43:23	2018-11-22 10:43:27	No deje pasar el tiempo. Sus cesantias en el FNA pueden ser la primera cuota de una casa. Quiere saber mas? SIN COSTO, responda SI o NO	Pendiente	2018-11-22	2018-11-22
9006909	13454731	AM	3113317687	2018-11-22 10:43:23	2018-11-22 10:46:05	HERNANDO Sus cesantias en el FNA pueden ser la primera cuota de una casa. En 2018 financiamos 9669 clientes como Ud. Quiere saber mas? SIN COSTO, responda SI o NO	SI	2018-11-22	2018-11-22	Muchas gracias por su respuesta. Un asesor del fondo Nacional del Ahorro se comunicara con usted.
9047618	73549849	AM	3155144197	2018-11-22 10:43:23	2018-11-22 10:43:27	No deje pasar el tiempo. Sus cesantias en el FNA pueden ser la primera cuota de una casa. Quiere saber mas? SIN COSTO, responda SI o NO	Pendiente	2018-11-22	2018-11-22
9101047	4079424	AM	3218025003	2018-11-22 10:43:23	2018-11-22 10:43:27	FABIO Sus cesantias en el FNA pueden ser la primera cuota de una casa. En 2018 financiamos 9669 clientes como Ud. Quiere saber mas? SIN COSTO, responda SI o NO	Pendiente	2018-11-22	2018-11-22
9183223	7931714	AM	3205371586	2018-11-22 10:43:23	2018-11-22 10:43:27	Sus cesantias en el FNA pueden ser la primera cuota de una casa. En 2018 financiamos 9669 clientes como Ud. Quiere saber mas? SIN COSTO, responda SI o NO	Pendiente	2018-11-22	2018-11-22
7242781	59832848	AM	3183938153	2018-11-22 10:43:23	2018-11-22 10:43:27	Sea propietario! Sus cesantias en el FNA pueden ser la primera cuota de una casa. Quiere saber mas? SIN COSTO, responda SI o NO	Pendiente	2018-11-22	2018-11-22
7247175	43723245	AM	3044011351	2018-11-22 10:43:23	2018-11-22 10:43:27	Sus cesantias en el FNA pueden ser la primera cuota de una casa. Quiere saber mas? SIN COSTO, responda SI o NO	Pendiente	2018-11-22	2018-11-22
7252017	32143594	AM	3108215340	2018-11-22 10:43:23	2018-11-22 10:49:01	MARIA No deje pasar el tiempo. Sus cesantias en el FNA pueden ser la primera cuota de una casa. Quiere saber mas? SIN COSTO, responda SI o NO	SI	2018-11-22	2018-11-22	Muchas gracias por su respuesta. Un asesor del fondo Nacional del Ahorro se comunicara con usted.
7266290	16661899	AM	3187680097	2018-11-22 10:43:23	2018-11-22 10:43:27	Sus cesantias en el FNA pueden ser la primera cuota de una casa. Quiere saber mas? SIN COSTO, responda SI o NO	Pendiente	2018-11-22	2018-11-22
7282189	32621760	AM	3114166430	2018-11-22 10:43:23	2018-11-22 10:43:27	BETTY Sus cesantias en el FNA pueden ser la primera cuota de una casa para su familia. Quiere saber mas? SIN COSTO, responda SI o NO	Pendiente	2018-11-22	2018-11-22
7286348	1130676535	AM	3156116505	2018-11-22 10:43:23	2018-11-22 10:43:27	Sus cesantias en el FNA pueden ser la primera cuota de una casa en CALI. Quiere saber mas? SIN COSTO, responda SI o NO	Pendiente	2018-11-22	2018-11-22
7305604	18416834	AM	3217558595	2018-11-22 10:43:23	2018-11-22 10:43:27	Sus cesantias en el FNA pueden ser la primera cuota de una casa. En 2018 financiamos 9669 clientes como Ud. Quiere saber mas? SIN COSTO, responda SI o NO	Pendiente	2018-11-22	2018-11-22
7323390	43446149	AM	3217379761	2018-11-22 10:43:23	2018-11-22 10:43:27	BEATRIZ Sus cesantias en el FNA pueden ser la primera cuota de una casa. Hay subsidios disponibles, preguntelos. Quiere saber mas? SIN COSTO, responda SI o NO	Pendiente	2018-11-22	2018-11-22
7330389	39184729	AM	3007244975	2018-11-22 10:43:23	2018-11-22 10:43:27	Sus cesantias en el FNA pueden ser la primera cuota de una casa para su familia. Quiere saber mas? SIN COSTO, responda SI o NO	Pendiente	2018-11-22	2018-11-22
7332985	30278645	AM	3105221303	2018-11-22 10:43:23	2018-11-22 10:43:27	LUZ Sus cesantias en el FNA pueden ser la primera cuota de una casa para su familia. Quiere saber mas? SIN COSTO, responda SI o NO	Pendiente	2018-11-22	2018-11-22
7339149	75049883	AM	3146603598	2018-11-22 10:43:23	2018-11-22 10:43:27	JORGE Sea propietario! Sus cesantias en el FNA pueden ser la primera cuota de una casa. Quiere saber mas? SIN COSTO, responda SI o NO	Pendiente	2018-11-22	2018-11-22
4160856	93410984	AM	3014261883	2018-11-22 10:43:23	2018-11-22 10:43:27	Sea propietario! Sus cesantias en el FNA pueden ser la primera cuota de una casa. Quiere saber mas? SIN COSTO, responda SI o NO	Pendiente	2018-11-22	2018-11-22
4166509	73146027	AM	3002043941	2018-11-22 10:43:23	2018-11-22 10:43:27	HENRY Sus cesantias en el FNA pueden ser la primera cuota de una casa en CARTAGENA. Quiere saber mas? SIN COSTO, responda SI o NO	Pendiente	2018-11-22	2018-11-22
4170006	52998707	AM	3004076516	2018-11-22 10:43:23	2018-11-22 10:43:27	Sus cesantias en el FNA pueden ser la primera cuota de una casa. Hay subsidios disponibles, preguntelos. Quiere saber mas? SIN COSTO, responda SI o NO	Pendiente	2018-11-22	2018-11-22
4183117	71707305	AM	3012655056	2018-11-22 10:43:23	2018-11-22 10:43:27	FABIAN Sus cesantias en el FNA pueden ser la primera cuota de una casa. Hay subsidios disponibles, preguntelos. Quiere saber mas? SIN COSTO, responda SI o NO	Pendiente	2018-11-22	2018-11-22
4193166	88242910	AM	3208557239	2018-11-22 10:43:23	2018-11-22 10:43:27	Sus cesantias en el FNA pueden ser la primera cuota de una casa. En 2018 financiamos 9669 clientes como Ud. Quiere saber mas? SIN COSTO, responda SI o NO	Pendiente	2018-11-22	2018-11-22
4197063	55231366	AM	3165294544	2018-11-22 10:43:23	2018-11-22 10:43:27	Sus cesantias en el FNA pueden ser la primera cuota de una casa. Hay subsidios disponibles, preguntelos. Quiere saber mas? SIN COSTO, responda SI o NO	Pendiente	2018-11-22	2018-11-22
4201829	91525635	AM	3012218133	2018-11-22 10:43:23	2018-11-22 10:43:27	Sus cesantias en el FNA pueden ser la primera cuota de una casa. Quiere saber mas? SIN COSTO, responda SI o NO	Pendiente	2018-11-22	2018-11-22
4209127	1049633107	AM	3138810982	2018-11-22 10:43:23	2018-11-22 10:43:27	Sus cesantias en el FNA pueden ser la primera cuota de una casa. Quiere saber mas? SIN COSTO, responda SI o NO	Pendiente	2018-11-22	2018-11-22
4210844	55248195	AM	3017155066	2018-11-22 10:43:23	2018-11-22 10:43:27	Sus cesantias en el FNA pueden ser la primera cuota de una casa. Hay subsidios disponibles, preguntelos. Quiere saber mas? SIN COSTO, responda SI o NO	Pendiente	2018-11-22	2018-11-22
4211398	98677907	AM	3157129499	2018-11-22 10:43:23	2018-11-22 10:43:27	DALADIER Sus cesantias en el FNA pueden ser la primera cuota de una casa para su familia. Quiere saber mas? SIN COSTO, responda SI o NO	Pendiente	2018-11-22	2018-11-22
4215661	1047440773	AM	3183795540	2018-11-22 10:43:23	2018-11-22 10:43:27	Sus cesantias en el FNA pueden ser la primera cuota de una casa para su familia. Quiere saber mas? SIN COSTO, responda SI o NO	Pendiente	2018-11-22	2018-11-22
4220148	15334442	AM	3112788302	2018-11-22 10:43:23	2018-11-23 18:12:30	JOSE Sus cesantias en el FNA pueden ser la primera cuota de una casa. Hay subsidios disponibles, preguntelos. Quiere saber mas? SIN COSTO, responda SI o NO	SI	2018-11-22	2018-11-22	Muchas gracias por su respuesta. Un asesor del fondo Nacional del Ahorro se comunicara con usted.
4227108	71579493	AM	3128665573	2018-11-22 10:43:23	2018-11-22 10:44:13	Sus cesantias en el FNA pueden ser la primera cuota de una casa en MEDELLIN. Quiere saber mas? SIN COSTO, responda SI o NO	SI	2018-11-22	2018-11-22	Muchas gracias por su respuesta. Un asesor del fondo Nacional del Ahorro se comunicara con usted.
4228365	98567545	AM	3217595865	2018-11-22 10:43:23	2018-11-22 10:43:27	Sus cesantias en el FNA pueden ser la primera cuota de una casa en MEDELLIN. Quiere saber mas? SIN COSTO, responda SI o NO	Pendiente	2018-11-22	2018-11-22
4233403	32735605	AM	3107380609	2018-11-22 10:43:23	2018-11-22 10:43:27	Sea propietario! Sus cesantias en el FNA pueden ser la primera cuota de una casa. Quiere saber mas? SIN COSTO, responda SI o NO	Pendiente	2018-11-22	2018-11-22
4236236	36302576	AM	3002158565	2018-11-22 10:43:23	2018-11-22 10:43:27	Sus cesantias en el FNA pueden ser la primera cuota de una casa. En 2018 financiamos 9669 clientes como Ud. Quiere saber mas? SIN COSTO, responda SI o NO	Pendiente	2018-11-22	2018-11-22
4237803	1075225182	AM	3005686110	2018-11-22 10:43:23	2018-11-22 10:43:27	PAOLA Sus cesantias en el FNA pueden ser la primera cuota de una casa. Hay subsidios disponibles, preguntelos. Quiere saber mas? SIN COSTO, responda SI o NO	Pendiente	2018-11-22	2018-11-22
4241433	1128283769	AM	3014539052	2018-11-22 10:43:23	2018-11-22 10:43:27	Sea propietario! Sus cesantias en el FNA pueden ser la primera cuota de una casa. Quiere saber mas? SIN COSTO, responda SI o NO	Pendiente	2018-11-22	2018-11-22
4242285	74324265	AM	3103265142	2018-11-22 10:43:23	2018-11-22 14:11:51	HECTOR No deje pasar el tiempo. Sus cesantias en el FNA pueden ser la primera cuota de una casa. Quiere saber mas? SIN COSTO, responda SI o NO	SI	2018-11-22	2018-11-22	Muchas gracias por su respuesta. Un asesor del fondo Nacional del Ahorro se comunicara con usted.
4245155	71630131	AM	3017342434	2018-11-22 10:43:23	2018-11-22 10:55:02	Sus cesantias en el FNA pueden ser la primera cuota de una casa para su familia. Quiere saber mas? SIN COSTO, responda SI o NO	SI	2018-11-22	2018-11-22	Muchas gracias por su respuesta. Un asesor del fondo Nacional del Ahorro se comunicara con usted.
4246514	30306844	AM	3127552735	2018-11-22 10:43:23	2018-11-22 10:43:27	Sus cesantias en el FNA pueden ser la primera cuota de una casa. En 2018 financiamos 9669 clientes como Ud. Quiere saber mas? SIN COSTO, responda SI o NO	Pendiente	2018-11-22	2018-11-22
4247444	98595695	AM	3113933504	2018-11-22 10:43:23	2018-11-22 10:43:27	Sus cesantias en el FNA pueden ser la primera cuota de una casa en MEDELLIN. Quiere saber mas? SIN COSTO, responda SI o NO	Pendiente	2018-11-22	2018-11-22
4249099	36289698	AM	3174279347	2018-11-22 10:43:23	2018-11-22 13:58:23	YAMID Sus cesantias en el FNA pueden ser la primera cuota de una casa. Hay subsidios disponibles, preguntelos. Quiere saber mas? SIN COSTO, responda SI o NO	SI	2018-11-22	2018-11-22	Muchas gracias por su respuesta. Un asesor del fondo Nacional del Ahorro se comunicara con usted.
4251919	77192428	AM	3114244959	2018-11-22 10:43:23	2018-11-22 10:43:27	EDWIN Sea propietario! Sus cesantias en el FNA pueden ser la primera cuota de una casa. Quiere saber mas? SIN COSTO, responda SI o NO	Pendiente	2018-11-22	2018-11-22
10465086	1130648452	AM	3147835054	2018-11-22 10:43:23	2018-11-22 10:43:27	Sea propietario! Sus cesantias en el FNA pueden ser la primera cuota de una casa. Quiere saber mas? SIN COSTO, responda SI o NO	Pendiente	2018-11-22	2018-11-22
10511220	4637720	AM	3122448914	2018-11-22 10:43:23	2018-11-25 16:03:24	JORGE Sea propietario! Sus cesantias en el FNA pueden ser la primera cuota de una casa. Quiere saber mas? SIN COSTO, responda SI o NO	SI	2018-11-22	2018-11-22	Muchas gracias por su respuesta. Un asesor del fondo Nacional del Ahorro se comunicara con usted.
10519046	71794973	AM	3216264286	2018-11-22 10:43:23	2018-11-22 10:43:27	Sus cesantias en el FNA pueden ser la primera cuota de una casa para su familia. Quiere saber mas? SIN COSTO, responda SI o NO	Pendiente	2018-11-22	2018-11-22
10617722	29113892	AM	3154382294	2018-11-22 10:43:23	2018-11-22 10:43:27	Sus cesantias en el FNA pueden ser la primera cuota de una casa. Hay subsidios disponibles, preguntelos. Quiere saber mas? SIN COSTO, responda SI o NO	Pendiente	2018-11-22	2018-11-22
10642232	16931694	AM	3167558615	2018-11-22 10:43:23	2018-11-22 10:43:27	Sus cesantias en el FNA pueden ser la primera cuota de una casa. Hay subsidios disponibles, preguntelos. Quiere saber mas? SIN COSTO, responda SI o NO	Pendiente	2018-11-22	2018-11-22
10679583	38864618	AM	3178825751	2018-11-22 10:43:23	2018-11-22 10:43:27	Sea propietario! Sus cesantias en el FNA pueden ser la primera cuota de una casa. Quiere saber mas? SIN COSTO, responda SI o NO	Pendiente	2018-11-22	2018-11-22
10688418	4238540	AM	3115636052	2018-11-22 10:43:23	2018-11-22 10:43:27	LUIS Sus cesantias en el FNA pueden ser la primera cuota de una casa en YOPAL. Quiere saber mas? SIN COSTO, responda SI o NO	Pendiente	2018-11-22	2018-11-22
10696664	12584698	AM	3024024101	2018-11-22 10:43:23	2018-11-22 10:43:27	Sus cesantias en el FNA pueden ser la primera cuota de una casa. Quiere saber mas? SIN COSTO, responda SI o NO	Pendiente	2018-11-22	2018-11-22
10715865	55176389	AM	3162391134	2018-11-22 10:43:23	2018-11-22 10:43:27	ROSA Sus cesantias en el FNA pueden ser la primera cuota de una casa para su familia. Quiere saber mas? SIN COSTO, responda SI o NO	Pendiente	2018-11-22	2018-11-22
3134049	66978372	AM	3164497112	2018-11-22 10:43:23	2018-11-22 10:43:27	Sus cesantias en el FNA pueden ser la primera cuota de una casa en CALI. Quiere saber mas? SIN COSTO, responda SI o NO	Pendiente	2018-11-22	2018-11-22
3150524	8128562	AM	3012383822	2018-11-22 10:43:23	2018-11-22 10:43:27	MILLER Sus cesantias en el FNA pueden ser la primera cuota de una casa. En 2018 financiamos 9669 clientes como Ud. Quiere saber mas? SIN COSTO, responda SI o NO	Pendiente	2018-11-22	2018-11-22
3154049	40021097	AM	3133941080	2018-11-22 10:43:23	2018-11-22 10:43:27	Sus cesantias en el FNA pueden ser la primera cuota de una casa. En 2018 financiamos 9669 clientes como Ud. Quiere saber mas? SIN COSTO, responda SI o NO	Pendiente	2018-11-22	2018-11-22
3158377	91153832	AM	3166958776	2018-11-22 10:43:23	2018-11-22 10:43:27	Sus cesantias en el FNA pueden ser la primera cuota de una casa para su familia. Quiere saber mas? SIN COSTO, responda SI o NO	Pendiente	2018-11-22	2018-11-22
3171362	16072065	AM	3206256698	2018-11-22 10:43:23	2018-11-22 10:43:27	JAIME Sus cesantias en el FNA pueden ser la primera cuota de una casa para su familia. Quiere saber mas? SIN COSTO, responda SI o NO	Pendiente	2018-11-22	2018-11-22
3178938	80037566	AM	3005796516	2018-11-22 10:43:23	2018-11-22 10:43:27	Sus cesantias en el FNA pueden ser la primera cuota de una casa para su familia. Quiere saber mas? SIN COSTO, responda SI o NO	Pendiente	2018-11-22	2018-11-22
3180367	29658681	AM	3206665364	2018-11-22 10:43:23	2018-11-22 10:43:27	ALEJANDRA Sea propietario! Sus cesantias en el FNA pueden ser la primera cuota de una casa. Quiere saber mas? SIN COSTO, responda SI o NO	Pendiente	2018-11-22	2018-11-22
3191737	43918909	AM	3114348594	2018-11-22 10:43:23	2018-11-22 10:43:27	Sus cesantias en el FNA pueden ser la primera cuota de una casa. Quiere saber mas? SIN COSTO, responda SI o NO	Pendiente	2018-11-22	2018-11-22
3194591	66814024	AM	3122241431	2018-11-22 10:43:23	2018-11-22 10:43:27	Sus cesantias en el FNA pueden ser la primera cuota de una casa. En 2018 financiamos 9669 clientes como Ud. Quiere saber mas? SIN COSTO, responda SI o NO	Pendiente	2018-11-22	2018-11-22
3197597	64703425	AM	3043868069	2018-11-22 10:43:23	2018-11-22 10:43:27	VIVIAN Sus cesantias en el FNA pueden ser la primera cuota de una casa. Hay subsidios disponibles, preguntelos. Quiere saber mas? SIN COSTO, responda SI o NO	Pendiente	2018-11-22	2018-11-22
3200073	79358711	AM	3123896009	2018-11-22 10:43:23	2018-11-22 10:43:27	Sus cesantias en el FNA pueden ser la primera cuota de una casa. En 2018 financiamos 9669 clientes como Ud. Quiere saber mas? SIN COSTO, responda SI o NO	Pendiente	2018-11-22	2018-11-22
3206106	30396270	AM	3106443684	2018-11-22 10:43:23	2018-11-22 10:45:00	DIANA Sus cesantias en el FNA pueden ser la primera cuota de una casa en MANIZALES. Quiere saber mas? SIN COSTO, responda SI o NO	SI	2018-11-22	2018-11-22	Muchas gracias por su respuesta. Un asesor del fondo Nacional del Ahorro se comunicara con usted.
3211927	52029436	AM	3106974216	2018-11-22 10:43:23	2018-11-22 10:43:27	No deje pasar el tiempo. Sus cesantias en el FNA pueden ser la primera cuota de una casa. Quiere saber mas? SIN COSTO, responda SI o NO	Pendiente	2018-11-22	2018-11-22
3217426	68288710	AM	3108693288	2018-11-22 10:43:23	2018-11-22 10:43:27	JAQUELINE Sus cesantias en el FNA pueden ser la primera cuota de una casa. En 2018 financiamos 9669 clientes como Ud. Quiere saber mas? SIN COSTO, responda SI o NO	Pendiente	2018-11-22	2018-11-22
3218343	1130605244	AM	3155879800	2018-11-22 10:43:23	2018-11-22 10:43:27	No deje pasar el tiempo. Sus cesantias en el FNA pueden ser la primera cuota de una casa. Quiere saber mas? SIN COSTO, responda SI o NO	Pendiente	2018-11-22	2018-11-22
3219542	30292347	AM	3116194478	2018-11-22 10:43:23	2018-11-22 10:43:27	Sus cesantias en el FNA pueden ser la primera cuota de una casa. En 2018 financiamos 9669 clientes como Ud. Quiere saber mas? SIN COSTO, responda SI o NO	Pendiente	2018-11-22	2018-11-22
3224971	52162121	AM	3118822185	2018-11-22 10:43:23	2018-11-22 10:43:27	DIANA Sus cesantias en el FNA pueden ser la primera cuota de una casa. En 2018 financiamos 9669 clientes como Ud. Quiere saber mas? SIN COSTO, responda SI o NO	Pendiente	2018-11-22	2018-11-22
4049144	51809618	AM	3005869097	2018-11-22 10:43:23	2018-11-22 10:43:27	No deje pasar el tiempo. Sus cesantias en el FNA pueden ser la primera cuota de una casa. Quiere saber mas? SIN COSTO, responda SI o NO	Pendiente	2018-11-22	2018-11-22
4054195	1098610521	AM	3114430739	2018-11-22 10:43:23	2018-11-22 10:43:27	Sus cesantias en el FNA pueden ser la primera cuota de una casa en BUCARAMANGA. Quiere saber mas? SIN COSTO, responda SI o NO	Pendiente	2018-11-22	2018-11-22
4054970	75101135	AM	3102395520	2018-11-22 10:43:23	2018-11-22 10:43:27	JULIAN No deje pasar el tiempo. Sus cesantias en el FNA pueden ser la primera cuota de una casa. Quiere saber mas? SIN COSTO, responda SI o NO	Pendiente	2018-11-22	2018-11-22
4058966	7166107	AM	3136196216	2018-11-22 10:43:23	2018-11-22 10:43:27	Sus cesantias en el FNA pueden ser la primera cuota de una casa en MEDELLIN. Quiere saber mas? SIN COSTO, responda SI o NO	Pendiente	2018-11-22	2018-11-22
4060292	43622321	AM	3017259238	2018-11-22 10:43:23	2018-11-22 10:46:47	Sus cesantias en el FNA pueden ser la primera cuota de una casa. Quiere saber mas? SIN COSTO, responda SI o NO	SI	2018-11-22	2018-11-22	Muchas gracias por su respuesta. Un asesor del fondo Nacional del Ahorro se comunicara con usted.
4069137	29233044	AM	3007045956	2018-11-22 10:43:23	2018-11-22 10:43:27	Sea propietario! Sus cesantias en el FNA pueden ser la primera cuota de una casa. Quiere saber mas? SIN COSTO, responda SI o NO	Pendiente	2018-11-22	2018-11-22
4070386	31323482	AM	3005419394	2018-11-22 10:43:23	2018-11-22 10:43:27	No deje pasar el tiempo. Sus cesantias en el FNA pueden ser la primera cuota de una casa. Quiere saber mas? SIN COSTO, responda SI o NO	Pendiente	2018-11-22	2018-11-22
4084254	30729017	AM	3014705972	2018-11-22 10:43:23	2018-11-22 10:43:27	MIRYAN Sus cesantias en el FNA pueden ser la primera cuota de una casa. En 2018 financiamos 9669 clientes como Ud. Quiere saber mas? SIN COSTO, responda SI o NO	Pendiente	2018-11-22	2018-11-22
4094389	72005333	AM	3145014048	2018-11-22 10:43:23	2018-11-22 10:43:27	Sus cesantias en el FNA pueden ser la primera cuota de una casa en BARRANQUILLA. Quiere saber mas? SIN COSTO, responda SI o NO	Pendiente	2018-11-22	2018-11-22
4102894	37840119	AM	3103235544	2018-11-22 10:43:23	2018-11-22 10:43:27	Sus cesantias en el FNA pueden ser la primera cuota de una casa. En 2018 financiamos 9669 clientes como Ud. Quiere saber mas? SIN COSTO, responda SI o NO	Pendiente	2018-11-22	2018-11-22
4107948	66809135	AM	3216039036	2018-11-22 10:43:23	2018-11-22 10:43:27	Sea propietario! Sus cesantias en el FNA pueden ser la primera cuota de una casa. Quiere saber mas? SIN COSTO, responda SI o NO	Pendiente	2018-11-22	2018-11-22
4111672	10029277	AM	3183079233	2018-11-22 10:43:23	2018-11-22 10:43:27	CARLOS No deje pasar el tiempo. Sus cesantias en el FNA pueden ser la primera cuota de una casa. Quiere saber mas? SIN COSTO, responda SI o NO	Pendiente	2018-11-22	2018-11-22
4114148	65789292	AM	3153670639	2018-11-22 10:43:23	2018-11-22 10:43:27	Sus cesantias en el FNA pueden ser la primera cuota de una casa. En 2018 financiamos 9669 clientes como Ud. Quiere saber mas? SIN COSTO, responda SI o NO	Pendiente	2018-11-22	2018-11-22
4120431	36724650	AM	3155657043	2018-11-22 10:43:23	2018-11-22 10:43:27	Sea propietario! Sus cesantias en el FNA pueden ser la primera cuota de una casa. Quiere saber mas? SIN COSTO, responda SI o NO	Pendiente	2018-11-22	2018-11-22
4123221	12990690	AM	3132347092	2018-11-22 10:43:23	2018-11-22 10:43:27	Sus cesantias en el FNA pueden ser la primera cuota de una casa. Hay subsidios disponibles, preguntelos. Quiere saber mas? SIN COSTO, responda SI o NO	Pendiente	2018-11-22	2018-11-22
4124930	8063326	AM	3104064227	2018-11-22 10:43:23	2018-11-22 10:43:27	Sus cesantias en el FNA pueden ser la primera cuota de una casa. En 2018 financiamos 9669 clientes como Ud. Quiere saber mas? SIN COSTO, responda SI o NO	Pendiente	2018-11-22	2018-11-22
4129291	1032364774	AM	3105810002	2018-11-22 10:43:23	2018-11-22 10:43:27	Sus cesantias en el FNA pueden ser la primera cuota de una casa. En 2018 financiamos 9669 clientes como Ud. Quiere saber mas? SIN COSTO, responda SI o NO	Pendiente	2018-11-22	2018-11-22
4131363	30288686	AM	3003682665	2018-11-22 10:43:23	2018-11-22 10:43:27	No deje pasar el tiempo. Sus cesantias en el FNA pueden ser la primera cuota de una casa. Quiere saber mas? SIN COSTO, responda SI o NO	Pendiente	2018-11-22	2018-11-22
4133729	30729570	AM	3207205669	2018-11-22 10:43:23	2018-11-22 10:43:27	Sus cesantias en el FNA pueden ser la primera cuota de una casa. En 2018 financiamos 9669 clientes como Ud. Quiere saber mas? SIN COSTO, responda SI o NO	Pendiente	2018-11-22	2018-11-22
4136752	73190217	AM	3145957051	2018-11-22 10:43:23	2018-11-22 10:43:27	JHON Sus cesantias en el FNA pueden ser la primera cuota de una casa en CARTAGENA. Quiere saber mas? SIN COSTO, responda SI o NO	Pendiente	2018-11-22	2018-11-22
4137393	1061712614	AM	3113536275	2018-11-22 10:43:23	2018-11-22 11:20:30	Sea propietario! Sus cesantias en el FNA pueden ser la primera cuota de una casa. Quiere saber mas? SIN COSTO, responda SI o NO	SI	2018-11-22	2018-11-22	Muchas gracias por su respuesta. Un asesor del fondo Nacional del Ahorro se comunicara con usted.
4142781	72052007	AM	3215247524	2018-11-22 10:43:23	2018-11-22 10:43:27	TELEMACO Sea propietario! Sus cesantias en el FNA pueden ser la primera cuota de una casa. Quiere saber mas? SIN COSTO, responda SI o NO	Pendiente	2018-11-22	2018-11-22
4150382	71732351	AM	3122752064	2018-11-22 10:43:23	2018-11-22 10:43:27	Sus cesantias en el FNA pueden ser la primera cuota de una casa. Hay subsidios disponibles, preguntelos. Quiere saber mas? SIN COSTO, responda SI o NO	Pendiente	2018-11-22	2018-11-22
5843904	3539840	AM	3122064341	2018-11-22 10:43:23	2018-11-22 10:44:47	JAROL Sea propietario! Sus cesantias en el FNA pueden ser la primera cuota de una casa. Quiere saber mas? SIN COSTO, responda SI o NO	SI	2018-11-22	2018-11-22	Muchas gracias por su respuesta. Un asesor del fondo Nacional del Ahorro se comunicara con usted.
5845830	71741245	AM	3206963583	2018-11-22 10:43:23	2018-11-22 10:43:27	MAURICIO Sus cesantias en el FNA pueden ser la primera cuota de una casa en MEDELLIN. Quiere saber mas? SIN COSTO, responda SI o NO	Pendiente	2018-11-22	2018-11-22
5852671	1082841500	AM	3015005945	2018-11-22 10:43:23	2018-11-22 10:43:27	Sus cesantias en el FNA pueden ser la primera cuota de una casa para su familia. Quiere saber mas? SIN COSTO, responda SI o NO	Pendiente	2018-11-22	2018-11-22
5854725	86053648	AM	3212164950	2018-11-22 10:43:23	2018-11-22 10:43:27	RAFAEL Sus cesantias en el FNA pueden ser la primera cuota de una casa para su familia. Quiere saber mas? SIN COSTO, responda SI o NO	Pendiente	2018-11-22	2018-11-22
5857854	98391160	AM	3117273292	2018-11-22 10:43:23	2018-11-22 10:43:27	JOSE Sea propietario! Sus cesantias en el FNA pueden ser la primera cuota de una casa. Quiere saber mas? SIN COSTO, responda SI o NO	Pendiente	2018-11-22	2018-11-22
5868744	28919403	AM	3152872739	2018-11-22 10:43:23	2018-11-22 10:43:27	DEIRIS Sus cesantias en el FNA pueden ser la primera cuota de una casa. En 2018 financiamos 9669 clientes como Ud. Quiere saber mas? SIN COSTO, responda SI o NO	Pendiente	2018-11-22	2018-11-22
5870169	1010186760	AM	3113850475	2018-11-22 10:43:23	2018-11-22 10:43:27	Sus cesantias en el FNA pueden ser la primera cuota de una casa en CARTAGENA. Quiere saber mas? SIN COSTO, responda SI o NO	Pendiente	2018-11-22	2018-11-22
5871434	16655836	AM	3204984104	2018-11-22 10:43:23	2018-11-22 10:43:27	Sus cesantias en el FNA pueden ser la primera cuota de una casa. Quiere saber mas? SIN COSTO, responda SI o NO	Pendiente	2018-11-22	2018-11-22
5872323	32749876	AM	3106313645	2018-11-22 10:43:23	2018-11-22 10:43:27	Sus cesantias en el FNA pueden ser la primera cuota de una casa para su familia. Quiere saber mas? SIN COSTO, responda SI o NO	Pendiente	2018-11-22	2018-11-22
5883708	77023098	AM	3116598641	2018-11-22 10:43:23	2018-11-22 10:43:27	Sus cesantias en el FNA pueden ser la primera cuota de una casa. Quiere saber mas? SIN COSTO, responda SI o NO	Pendiente	2018-11-22	2018-11-22
5884756	80851213	AM	3212364988	2018-11-22 10:43:23	2018-11-22 10:43:27	Sea propietario! Sus cesantias en el FNA pueden ser la primera cuota de una casa. Quiere saber mas? SIN COSTO, responda SI o NO	Pendiente	2018-11-22	2018-11-22
5893448	32324934	AM	3127033094	2018-11-22 10:43:23	2018-11-22 10:43:27	ANGELA Sus cesantias en el FNA pueden ser la primera cuota de una casa. Hay subsidios disponibles, preguntelos. Quiere saber mas? SIN COSTO, responda SI o NO	Pendiente	2018-11-22	2018-11-22
5922831	10302814	AM	3016570864	2018-11-22 10:43:23	2018-11-22 10:43:27	JOHN Sus cesantias en el FNA pueden ser la primera cuota de una casa para su familia. Quiere saber mas? SIN COSTO, responda SI o NO	Pendiente	2018-11-22	2018-11-22
11055219	16689444	AM	3174336251	2018-11-22 10:43:23	2018-11-22 10:43:27	No deje pasar el tiempo. Sus cesantias en el FNA pueden ser la primera cuota de una casa. Quiere saber mas? SIN COSTO, responda SI o NO	Pendiente	2018-11-22	2018-11-22
11090952	6098919	AM	3214110619	2018-11-22 10:43:23	2018-11-22 10:43:27	Sus cesantias en el FNA pueden ser la primera cuota de una casa. Quiere saber mas? SIN COSTO, responda SI o NO	Pendiente	2018-11-22	2018-11-22
11103414	38870947	AM	3155517262	2018-11-22 10:43:23	2018-11-22 10:43:27	Sus cesantias en el FNA pueden ser la primera cuota de una casa. En 2018 financiamos 9669 clientes como Ud. Quiere saber mas? SIN COSTO, responda SI o NO	Pendiente	2018-11-22	2018-11-22
11114871	16288576	AM	3156517659	2018-11-22 10:43:23	2018-11-22 10:43:27	VICTOR Sus cesantias en el FNA pueden ser la primera cuota de una casa. Hay subsidios disponibles, preguntelos. Quiere saber mas? SIN COSTO, responda SI o NO	Pendiente	2018-11-22	2018-11-22
11130805	8164531	AM	3103935137	2018-11-22 10:43:23	2018-11-22 10:43:27	JUAN Sus cesantias en el FNA pueden ser la primera cuota de una casa para su familia. Quiere saber mas? SIN COSTO, responda SI o NO	Pendiente	2018-11-22	2018-11-22
894515	75102498	AM	3136529939	2018-11-22 10:43:23	2018-11-22 10:43:27	Sus cesantias en el FNA pueden ser la primera cuota de una casa. Quiere saber mas? SIN COSTO, responda SI o NO	Pendiente	2018-11-22	2018-11-22
894633	34567135	AM	3155180469	2018-11-22 10:43:23	2018-11-22 10:43:27	Sea propietario! Sus cesantias en el FNA pueden ser la primera cuota de una casa. Quiere saber mas? SIN COSTO, responda SI o NO	Pendiente	2018-11-22	2018-11-22
896242	53063838	AM	3008146888	2018-11-22 10:43:23	2018-11-22 10:43:27	Sus cesantias en el FNA pueden ser la primera cuota de una casa. En 2018 financiamos 9669 clientes como Ud. Quiere saber mas? SIN COSTO, responda SI o NO	Pendiente	2018-11-22	2018-11-22
897930	43700663	AM	3136422426	2018-11-22 10:43:23	2018-11-22 10:43:27	DORANY Sus cesantias en el FNA pueden ser la primera cuota de una casa. Hay subsidios disponibles, preguntelos. Quiere saber mas? SIN COSTO, responda SI o NO	Pendiente	2018-11-22	2018-11-22
899387	66758055	AM	3006143336	2018-11-22 10:43:23	2018-11-22 10:43:27	LILIANA No deje pasar el tiempo. Sus cesantias en el FNA pueden ser la primera cuota de una casa. Quiere saber mas? SIN COSTO, responda SI o NO	Pendiente	2018-11-22	2018-11-22
900013	43161242	AM	3148853857	2018-11-22 10:43:23	2018-11-22 10:43:27	YASMID Sus cesantias en el FNA pueden ser la primera cuota de una casa. En 2018 financiamos 9669 clientes como Ud. Quiere saber mas? SIN COSTO, responda SI o NO	Pendiente	2018-11-22	2018-11-22
901327	29178258	AM	3122251771	2018-11-22 10:43:23	2018-11-22 10:43:27	Sus cesantias en el FNA pueden ser la primera cuota de una casa. Hay subsidios disponibles, preguntelos. Quiere saber mas? SIN COSTO, responda SI o NO	Pendiente	2018-11-22	2018-11-22
901512	36173303	AM	3112045566	2018-11-22 10:43:23	2018-11-22 10:43:27	Sus cesantias en el FNA pueden ser la primera cuota de una casa. Quiere saber mas? SIN COSTO, responda SI o NO	Pendiente	2018-11-22	2018-11-22
903461	65701216	AM	3186384062	2018-11-22 10:43:23	2018-11-22 10:43:27	MARIA Sus cesantias en el FNA pueden ser la primera cuota de una casa. Hay subsidios disponibles, preguntelos. Quiere saber mas? SIN COSTO, responda SI o NO	Pendiente	2018-11-22	2018-11-22
906582	1070944074	AM	3145445974	2018-11-22 10:43:23	2018-11-22 10:43:27	LILIANA Sea propietario! Sus cesantias en el FNA pueden ser la primera cuota de una casa. Quiere saber mas? SIN COSTO, responda SI o NO	Pendiente	2018-11-22	2018-11-22
907178	53010940	AM	3145653708	2018-11-22 10:43:23	2018-11-22 10:43:27	Sus cesantias en el FNA pueden ser la primera cuota de una casa para su familia. Quiere saber mas? SIN COSTO, responda SI o NO	Pendiente	2018-11-22	2018-11-22
908823	79783414	AM	3113442752	2018-11-22 10:43:23	2018-11-22 10:43:27	RICARDO Sus cesantias en el FNA pueden ser la primera cuota de una casa. Hay subsidios disponibles, preguntelos. Quiere saber mas? SIN COSTO, responda SI o NO	Pendiente	2018-11-22	2018-11-22
910724	42789578	AM	3136679687	2018-11-22 10:43:23	2018-11-22 10:43:27	Sus cesantias en el FNA pueden ser la primera cuota de una casa. Hay subsidios disponibles, preguntelos. Quiere saber mas? SIN COSTO, responda SI o NO	Pendiente	2018-11-22	2018-11-22
913529	32638035	AM	3138320593	2018-11-22 10:43:23	2018-11-22 10:43:27	MARTHA Sus cesantias en el FNA pueden ser la primera cuota de una casa. Hay subsidios disponibles, preguntelos. Quiere saber mas? SIN COSTO, responda SI o NO	Pendiente	2018-11-22	2018-11-22
916692	66841381	AM	3208025843	2018-11-22 10:43:23	2018-11-22 10:43:27	Sus cesantias en el FNA pueden ser la primera cuota de una casa para su familia. Quiere saber mas? SIN COSTO, responda SI o NO	Pendiente	2018-11-22	2018-11-22
916759	30338753	AM	3104598768	2018-11-22 10:43:23	2018-11-22 10:43:27	No deje pasar el tiempo. Sus cesantias en el FNA pueden ser la primera cuota de una casa. Quiere saber mas? SIN COSTO, responda SI o NO	Pendiente	2018-11-22	2018-11-22
921324	16859395	AM	3103712728	2018-11-22 10:43:23	2018-11-22 10:43:27	LUIS Sus cesantias en el FNA pueden ser la primera cuota de una casa en CALI. Quiere saber mas? SIN COSTO, responda SI o NO	Pendiente	2018-11-22	2018-11-22
922782	37557334	AM	3165778966	2018-11-22 10:43:23	2018-11-22 10:43:27	Sus cesantias en el FNA pueden ser la primera cuota de una casa. Hay subsidios disponibles, preguntelos. Quiere saber mas? SIN COSTO, responda SI o NO	Pendiente	2018-11-22	2018-11-22
923000	74380967	AM	3165474944	2018-11-22 10:43:23	2018-11-22 10:43:27	Sus cesantias en el FNA pueden ser la primera cuota de una casa. En 2018 financiamos 9669 clientes como Ud. Quiere saber mas? SIN COSTO, responda SI o NO	Pendiente	2018-11-22	2018-11-22
925974	36530289	AM	3135215384	2018-11-22 10:43:23	2018-11-22 10:43:27	ESTHER Sea propietario! Sus cesantias en el FNA pueden ser la primera cuota de una casa. Quiere saber mas? SIN COSTO, responda SI o NO	Pendiente	2018-11-22	2018-11-22
927585	7228239	AM	3134113578	2018-11-22 10:43:23	2018-11-22 10:43:27	No deje pasar el tiempo. Sus cesantias en el FNA pueden ser la primera cuota de una casa. Quiere saber mas? SIN COSTO, responda SI o NO	Pendiente	2018-11-22	2018-11-22
929906	22479008	AM	3163838960	2018-11-22 10:43:23	2018-11-22 10:43:27	VERONICA Sus cesantias en el FNA pueden ser la primera cuota de una casa en BARRANQUILLA. Quiere saber mas? SIN COSTO, responda SI o NO	Pendiente	2018-11-22	2018-11-22
934733	30400273	AM	3103593433	2018-11-22 10:43:23	2018-11-22 10:43:27	PAULA Sus cesantias en el FNA pueden ser la primera cuota de una casa. Hay subsidios disponibles, preguntelos. Quiere saber mas? SIN COSTO, responda SI o NO	Pendiente	2018-11-22	2018-11-22
937058	30405728	AM	3148584184	2018-11-22 10:43:23	2018-11-22 10:43:27	Sea propietario! Sus cesantias en el FNA pueden ser la primera cuota de una casa. Quiere saber mas? SIN COSTO, responda SI o NO	Pendiente	2018-11-22	2018-11-22
937684	27279241	AM	3176630808	2018-11-22 10:43:23	2018-11-22 10:43:27	YANNET Sus cesantias en el FNA pueden ser la primera cuota de una casa. En 2018 financiamos 9669 clientes como Ud. Quiere saber mas? SIN COSTO, responda SI o NO	Pendiente	2018-11-22	2018-11-22
939217	71664635	AM	3127769613	2018-11-22 10:43:23	2018-11-22 10:43:27	Sus cesantias en el FNA pueden ser la primera cuota de una casa. Quiere saber mas? SIN COSTO, responda SI o NO	Pendiente	2018-11-22	2018-11-22
940815	25126746	AM	3136096689	2018-11-22 10:43:23	2018-11-22 10:43:27	GLORIA Sus cesantias en el FNA pueden ser la primera cuota de una casa. Hay subsidios disponibles, preguntelos. Quiere saber mas? SIN COSTO, responda SI o NO	Pendiente	2018-11-22	2018-11-22
942318	16470160	AM	3186628982	2018-11-22 10:43:23	2018-11-22 10:43:27	EDGARDO Sus cesantias en el FNA pueden ser la primera cuota de una casa. Hay subsidios disponibles, preguntelos. Quiere saber mas? SIN COSTO, responda SI o NO	Pendiente	2018-11-22	2018-11-22
944205	75074859	AM	3122442972	2018-11-22 10:43:23	2018-11-22 10:43:27	Sus cesantias en el FNA pueden ser la primera cuota de una casa. Quiere saber mas? SIN COSTO, responda SI o NO	Pendiente	2018-11-22	2018-11-22
945004	76330666	AM	3002391129	2018-11-22 10:43:23	2018-11-22 10:43:27	PABLO Sus cesantias en el FNA pueden ser la primera cuota de una casa. En 2018 financiamos 9669 clientes como Ud. Quiere saber mas? SIN COSTO, responda SI o NO	Pendiente	2018-11-22	2018-11-22
947949	42143869	AM	3103728380	2018-11-22 10:43:23	2018-11-22 10:43:27	Sus cesantias en el FNA pueden ser la primera cuota de una casa para su familia. Quiere saber mas? SIN COSTO, responda SI o NO	Pendiente	2018-11-22	2018-11-22
3730965	1105783002	AM	3212885619	2018-11-22 10:43:23	2018-11-22 10:43:27	No deje pasar el tiempo. Sus cesantias en el FNA pueden ser la primera cuota de una casa. Quiere saber mas? SIN COSTO, responda SI o NO	Pendiente	2018-11-22	2018-11-22
3734564	4612750	AM	3105978804	2018-11-22 10:43:23	2018-11-22 18:58:00	No deje pasar el tiempo. Sus cesantias en el FNA pueden ser la primera cuota de una casa. Quiere saber mas? SIN COSTO, responda SI o NO	SI	2018-11-22	2018-11-22	Muchas gracias por su respuesta. Un asesor del fondo Nacional del Ahorro se comunicara con usted.
3750344	1111743996	AM	3008225345	2018-11-22 10:43:23	2018-11-22 10:43:27	Sus cesantias en el FNA pueden ser la primera cuota de una casa. En 2018 financiamos 9669 clientes como Ud. Quiere saber mas? SIN COSTO, responda SI o NO	Pendiente	2018-11-22	2018-11-22
3756630	71330208	AM	3168342838	2018-11-22 10:43:23	2018-11-22 10:43:27	CARLOS Sus cesantias en el FNA pueden ser la primera cuota de una casa para su familia. Quiere saber mas? SIN COSTO, responda SI o NO	Pendiente	2018-11-22	2018-11-22
3758874	63437487	AM	3105509144	2018-11-22 10:43:23	2018-11-22 13:27:47	No deje pasar el tiempo. Sus cesantias en el FNA pueden ser la primera cuota de una casa. Quiere saber mas? SIN COSTO, responda SI o NO	SI	2018-11-22	2018-11-22	Muchas gracias por su respuesta. Un asesor del fondo Nacional del Ahorro se comunicara con usted.
3761862	73145093	AM	3145272612	2018-11-22 10:43:23	2018-11-22 10:43:27	YARISMEL Sea propietario! Sus cesantias en el FNA pueden ser la primera cuota de una casa. Quiere saber mas? SIN COSTO, responda SI o NO	Pendiente	2018-11-22	2018-11-22
3762135	45686125	AM	3126121864	2018-11-22 10:43:23	2018-11-22 10:43:27	Sea propietario! Sus cesantias en el FNA pueden ser la primera cuota de una casa. Quiere saber mas? SIN COSTO, responda SI o NO	Pendiente	2018-11-22	2018-11-22
3773119	1086754085	AM	3185158283	2018-11-22 10:43:23	2018-11-22 10:43:27	DIEGO Sea propietario! Sus cesantias en el FNA pueden ser la primera cuota de una casa. Quiere saber mas? SIN COSTO, responda SI o NO	Pendiente	2018-11-22	2018-11-22
3784059	1049614422	AM	3144890539	2018-11-22 10:43:23	2018-11-22 10:43:27	DIANA Sus cesantias en el FNA pueden ser la primera cuota de una casa. Hay subsidios disponibles, preguntelos. Quiere saber mas? SIN COSTO, responda SI o NO	Pendiente	2018-11-22	2018-11-22
3784143	78716832	AM	3017063022	2018-11-22 10:43:23	2018-11-22 10:43:27	HECTOR Sus cesantias en el FNA pueden ser la primera cuota de una casa. En 2018 financiamos 9669 clientes como Ud. Quiere saber mas? SIN COSTO, responda SI o NO	Pendiente	2018-11-22	2018-11-22
3795393	9175276	AM	3003121899	2018-11-22 10:43:23	2018-11-22 10:43:27	HERNANDO Sus cesantias en el FNA pueden ser la primera cuota de una casa. Hay subsidios disponibles, preguntelos. Quiere saber mas? SIN COSTO, responda SI o NO	Pendiente	2018-11-22	2018-11-22
3813927	55150773	AM	3168947548	2018-11-22 10:43:23	2018-11-22 10:43:27	ANGELICA Sus cesantias en el FNA pueden ser la primera cuota de una casa en NEIVA. Quiere saber mas? SIN COSTO, responda SI o NO	Pendiente	2018-11-22	2018-11-22
3816220	43583774	AM	3008235734	2018-11-22 10:43:23	2018-11-22 10:43:27	Sus cesantias en el FNA pueden ser la primera cuota de una casa para su familia. Quiere saber mas? SIN COSTO, responda SI o NO	Pendiente	2018-11-22	2018-11-22
3817131	43508271	AM	3007817763	2018-11-22 10:43:23	2018-11-22 11:01:22	MARIA Sus cesantias en el FNA pueden ser la primera cuota de una casa. En 2018 financiamos 9669 clientes como Ud. Quiere saber mas? SIN COSTO, responda SI o NO	SI	2018-11-22	2018-11-22	Muchas gracias por su respuesta. Un asesor del fondo Nacional del Ahorro se comunicara con usted.
3818048	10026280	AM	3206335910	2018-11-22 10:43:23	2018-11-22 10:43:27	Sus cesantias en el FNA pueden ser la primera cuota de una casa. Hay subsidios disponibles, preguntelos. Quiere saber mas? SIN COSTO, responda SI o NO	Pendiente	2018-11-22	2018-11-22
3821235	6446089	AM	3006582045	2018-11-22 10:43:23	2018-11-22 10:44:10	JORGE Sus cesantias en el FNA pueden ser la primera cuota de una casa para su familia. Quiere saber mas? SIN COSTO, responda SI o NO	SI	2018-11-22	2018-11-22	Muchas gracias por su respuesta. Un asesor del fondo Nacional del Ahorro se comunicara con usted.
3822764	55154608	AM	3155711630	2018-11-22 10:43:23	2018-11-22 10:43:27	MARY Sus cesantias en el FNA pueden ser la primera cuota de una casa en CALI. Quiere saber mas? SIN COSTO, responda SI o NO	Pendiente	2018-11-22	2018-11-22
3824395	1110503006	AM	3133943563	2018-11-22 10:43:23	2018-11-22 10:43:27	HAROLD Sea propietario! Sus cesantias en el FNA pueden ser la primera cuota de una casa. Quiere saber mas? SIN COSTO, responda SI o NO	Pendiente	2018-11-22	2018-11-22
6860981	16926278	AM	3175365628	2018-11-22 10:43:23	2018-11-22 10:43:27	No deje pasar el tiempo. Sus cesantias en el FNA pueden ser la primera cuota de una casa. Quiere saber mas? SIN COSTO, responda SI o NO	Pendiente	2018-11-22	2018-11-22
6869304	9923984	AM	3127660062	2018-11-22 10:43:23	2018-11-22 10:43:27	JUAN Sea propietario! Sus cesantias en el FNA pueden ser la primera cuota de una casa. Quiere saber mas? SIN COSTO, responda SI o NO	Pendiente	2018-11-22	2018-11-22
6888380	67013594	AM	3166930898	2018-11-22 10:43:23	2018-11-22 10:43:27	Sus cesantias en el FNA pueden ser la primera cuota de una casa. En 2018 financiamos 9669 clientes como Ud. Quiere saber mas? SIN COSTO, responda SI o NO	Pendiente	2018-11-22	2018-11-22
6911660	32529802	AM	3117831600	2018-11-22 10:43:23	2018-11-22 10:43:27	Sus cesantias en el FNA pueden ser la primera cuota de una casa. Hay subsidios disponibles, preguntelos. Quiere saber mas? SIN COSTO, responda SI o NO	Pendiente	2018-11-22	2018-11-22
6921073	71387738	AM	3148850095	2018-11-22 10:43:23	2018-11-22 10:43:27	Sus cesantias en el FNA pueden ser la primera cuota de una casa en MEDELLIN. Quiere saber mas? SIN COSTO, responda SI o NO	Pendiente	2018-11-22	2018-11-22
6929140	91488710	AM	3005556189	2018-11-22 10:43:24	2018-11-22 10:43:27	GABRIEL Sus cesantias en el FNA pueden ser la primera cuota de una casa para su familia. Quiere saber mas? SIN COSTO, responda SI o NO	Pendiente	2018-11-22	2018-11-22
6953039	98545861	AM	3105028725	2018-11-22 10:43:24	2018-11-22 10:43:27	WISTON Sus cesantias en el FNA pueden ser la primera cuota de una casa. En 2018 financiamos 9669 clientes como Ud. Quiere saber mas? SIN COSTO, responda SI o NO	Pendiente	2018-11-22	2018-11-22
6960437	31978438	AM	3113414191	2018-11-22 10:43:24	2018-11-22 11:24:06	Sus cesantias en el FNA pueden ser la primera cuota de una casa para su familia. Quiere saber mas? SIN COSTO, responda SI o NO	SI	2018-11-22	2018-11-22	Muchas gracias por su respuesta. Un asesor del fondo Nacional del Ahorro se comunicara con usted.
6963551	43555857	AM	3206132177	2018-11-22 10:43:24	2018-11-22 10:43:27	No deje pasar el tiempo. Sus cesantias en el FNA pueden ser la primera cuota de una casa. Quiere saber mas? SIN COSTO, responda SI o NO	Pendiente	2018-11-22	2018-11-22
6973058	1128429181	AM	3003458773	2018-11-22 10:43:24	2018-11-22 10:43:27	ANGIE No deje pasar el tiempo. Sus cesantias en el FNA pueden ser la primera cuota de una casa. Quiere saber mas? SIN COSTO, responda SI o NO	Pendiente	2018-11-22	2018-11-22
1986401	16721663	AM	3015993442	2018-11-22 10:43:24	2018-11-22 10:43:27	HERSON Sus cesantias en el FNA pueden ser la primera cuota de una casa. En 2018 financiamos 9669 clientes como Ud. Quiere saber mas? SIN COSTO, responda SI o NO	Pendiente	2018-11-22	2018-11-22
1987990	35261948	AM	3102717025	2018-11-22 10:43:24	2018-11-22 10:43:27	Sus cesantias en el FNA pueden ser la primera cuota de una casa. En 2018 financiamos 9669 clientes como Ud. Quiere saber mas? SIN COSTO, responda SI o NO	Pendiente	2018-11-22	2018-11-22
1990785	74379167	AM	3133995023	2018-11-22 10:43:24	2018-11-22 10:43:27	Sus cesantias en el FNA pueden ser la primera cuota de una casa. Hay subsidios disponibles, preguntelos. Quiere saber mas? SIN COSTO, responda SI o NO	Pendiente	2018-11-22	2018-11-22
1990941	39731089	AM	3112813445	2018-11-22 10:43:24	2018-11-22 10:43:27	Sus cesantias en el FNA pueden ser la primera cuota de una casa. Hay subsidios disponibles, preguntelos. Quiere saber mas? SIN COSTO, responda SI o NO	Pendiente	2018-11-22	2018-11-22
1990948	43046380	AM	3147657362	2018-11-22 10:43:24	2018-11-22 10:43:27	Sus cesantias en el FNA pueden ser la primera cuota de una casa en MEDELLIN. Quiere saber mas? SIN COSTO, responda SI o NO	Pendiente	2018-11-22	2018-11-22
1990958	43785162	AM	3006157395	2018-11-22 10:43:24	2018-11-22 10:43:27	DIANA Sus cesantias en el FNA pueden ser la primera cuota de una casa. Hay subsidios disponibles, preguntelos. Quiere saber mas? SIN COSTO, responda SI o NO	Pendiente	2018-11-22	2018-11-22
1991340	33630636	AM	3124026560	2018-11-22 10:43:24	2018-11-22 10:43:27	Sea propietario! Sus cesantias en el FNA pueden ser la primera cuota de una casa. Quiere saber mas? SIN COSTO, responda SI o NO	Pendiente	2018-11-22	2018-11-22
1992835	33367456	AM	3043816215	2018-11-22 10:43:24	2018-11-23 08:48:31	Sus cesantias en el FNA pueden ser la primera cuota de una casa para su familia. Quiere saber mas? SIN COSTO, responda SI o NO	SI	2018-11-22	2018-11-22	Muchas gracias por su respuesta. Un asesor del fondo Nacional del Ahorro se comunicara con usted.
1997166	88260963	AM	3174992338	2018-11-22 10:43:24	2018-11-22 10:43:27	Sus cesantias en el FNA pueden ser la primera cuota de una casa. Hay subsidios disponibles, preguntelos. Quiere saber mas? SIN COSTO, responda SI o NO	Pendiente	2018-11-22	2018-11-22
2013881	1085260704	AM	3177473127	2018-11-22 10:43:24	2018-11-22 10:43:27	Sus cesantias en el FNA pueden ser la primera cuota de una casa. Quiere saber mas? SIN COSTO, responda SI o NO	Pendiente	2018-11-22	2018-11-22
2028994	39047330	AM	3153724208	2018-11-22 10:43:24	2018-11-22 10:43:27	TATIANA Sea propietario! Sus cesantias en el FNA pueden ser la primera cuota de una casa. Quiere saber mas? SIN COSTO, responda SI o NO	Pendiente	2018-11-22	2018-11-22
2037236	16692295	AM	3182491393	2018-11-22 10:43:24	2018-11-22 11:09:25	No deje pasar el tiempo. Sus cesantias en el FNA pueden ser la primera cuota de una casa. Quiere saber mas? SIN COSTO, responda SI o NO	SI	2018-11-22	2018-11-22	Muchas gracias por su respuesta. Un asesor del fondo Nacional del Ahorro se comunicara con usted.
2043037	70103386	AM	3128046707	2018-11-22 10:43:24	2018-11-22 10:43:27	CARLOS Sus cesantias en el FNA pueden ser la primera cuota de una casa en MEDELLIN. Quiere saber mas? SIN COSTO, responda SI o NO	Pendiente	2018-11-22	2018-11-22
2053763	52018724	AM	3102485433	2018-11-22 10:43:24	2018-11-22 10:43:27	Sus cesantias en el FNA pueden ser la primera cuota de una casa. Hay subsidios disponibles, preguntelos. Quiere saber mas? SIN COSTO, responda SI o NO	Pendiente	2018-11-22	2018-11-22
2056344	7179610	AM	3114759997	2018-11-22 10:43:24	2018-11-22 10:43:27	Sea propietario! Sus cesantias en el FNA pueden ser la primera cuota de una casa. Quiere saber mas? SIN COSTO, responda SI o NO	Pendiente	2018-11-22	2018-11-22
2060681	30742804	AM	3157672278	2018-11-22 10:43:24	2018-11-22 10:43:27	LESVY Sus cesantias en el FNA pueden ser la primera cuota de una casa. Hay subsidios disponibles, preguntelos. Quiere saber mas? SIN COSTO, responda SI o NO	Pendiente	2018-11-22	2018-11-22
2062627	52046351	AM	3122724295	2018-11-22 10:43:24	2018-11-22 10:43:27	ALEXANDRA Sus cesantias en el FNA pueden ser la primera cuota de una casa para su familia. Quiere saber mas? SIN COSTO, responda SI o NO	Pendiente	2018-11-22	2018-11-22
2065992	76328331	AM	3012889329	2018-11-22 10:43:24	2018-11-22 10:43:27	Sus cesantias en el FNA pueden ser la primera cuota de una casa para su familia. Quiere saber mas? SIN COSTO, responda SI o NO	Pendiente	2018-11-22	2018-11-22
2068045	94388474	AM	3116329169	2018-11-22 10:43:24	2018-11-22 10:43:27	Sus cesantias en el FNA pueden ser la primera cuota de una casa. En 2018 financiamos 9669 clientes como Ud. Quiere saber mas? SIN COSTO, responda SI o NO	Pendiente	2018-11-22	2018-11-22
2076984	74372476	AM	3132445223	2018-11-22 10:43:24	2018-11-22 10:43:27	Sus cesantias en el FNA pueden ser la primera cuota de una casa para su familia. Quiere saber mas? SIN COSTO, responda SI o NO	Pendiente	2018-11-22	2018-11-22
11146616	33266555	AM	3012536830	2018-11-22 10:43:24	2018-11-22 10:43:27	DERNA Sea propietario! Sus cesantias en el FNA pueden ser la primera cuota de una casa. Quiere saber mas? SIN COSTO, responda SI o NO	Pendiente	2018-11-22	2018-11-22
11166087	94400334	AM	3137499677	2018-11-22 10:43:24	2018-11-22 10:43:27	JUAN No deje pasar el tiempo. Sus cesantias en el FNA pueden ser la primera cuota de una casa. Quiere saber mas? SIN COSTO, responda SI o NO	Pendiente	2018-11-22	2018-11-22
11180096	31971059	AM	3155874983	2018-11-22 10:43:24	2018-11-22 10:43:27	MARIA Sea propietario! Sus cesantias en el FNA pueden ser la primera cuota de una casa. Quiere saber mas? SIN COSTO, responda SI o NO	Pendiente	2018-11-22	2018-11-22
11187990	43727469	AM	3147205870	2018-11-22 10:43:24	2018-11-22 18:33:06	OLGA Sus cesantias en el FNA pueden ser la primera cuota de una casa en MEDELLIN. Quiere saber mas? SIN COSTO, responda SI o NO	SI	2018-11-22	2018-11-22	Muchas gracias por su respuesta. Un asesor del fondo Nacional del Ahorro se comunicara con usted.
11203494	15986076	AM	3057287907	2018-11-22 10:43:24	2018-11-22 10:43:27	Sus cesantias en el FNA pueden ser la primera cuota de una casa en BARRANQUILLA. Quiere saber mas? SIN COSTO, responda SI o NO	Pendiente	2018-11-22	2018-11-22
11218817	71217624	AM	3107878903	2018-11-22 10:43:24	2018-11-22 10:43:27	Sea propietario! Sus cesantias en el FNA pueden ser la primera cuota de una casa. Quiere saber mas? SIN COSTO, responda SI o NO	Pendiente	2018-11-22	2018-11-22
3234038	74371484	AM	3202712082	2018-11-22 10:43:24	2018-11-22 10:43:28	Sus cesantias en el FNA pueden ser la primera cuota de una casa. Hay subsidios disponibles, preguntelos. Quiere saber mas? SIN COSTO, responda SI o NO	Pendiente	2018-11-22	2018-11-22
3248882	46364374	AM	3138429080	2018-11-22 10:43:24	2018-11-22 10:43:28	Sus cesantias en el FNA pueden ser la primera cuota de una casa. Quiere saber mas? SIN COSTO, responda SI o NO	Pendiente	2018-11-22	2018-11-22
3265032	34570600	AM	3147528845	2018-11-22 10:43:24	2018-11-22 10:43:28	Sus cesantias en el FNA pueden ser la primera cuota de una casa. Hay subsidios disponibles, preguntelos. Quiere saber mas? SIN COSTO, responda SI o NO	Pendiente	2018-11-22	2018-11-22
3266155	30081592	AM	3125798237	2018-11-22 10:43:24	2018-11-22 10:43:28	Sus cesantias en el FNA pueden ser la primera cuota de una casa. En 2018 financiamos 9669 clientes como Ud. Quiere saber mas? SIN COSTO, responda SI o NO	Pendiente	2018-11-22	2018-11-22
3280920	1082848039	AM	3017603028	2018-11-22 10:43:24	2018-11-22 10:43:28	AURA No deje pasar el tiempo. Sus cesantias en el FNA pueden ser la primera cuota de una casa. Quiere saber mas? SIN COSTO, responda SI o NO	Pendiente	2018-11-22	2018-11-22
3287851	71798150	AM	3007684639	2018-11-22 10:43:24	2018-11-22 10:43:28	ANDRES Sea propietario! Sus cesantias en el FNA pueden ser la primera cuota de una casa. Quiere saber mas? SIN COSTO, responda SI o NO	Pendiente	2018-11-22	2018-11-22
3301167	49729323	AM	3207106081	2018-11-22 10:43:24	2018-11-22 10:43:28	No deje pasar el tiempo. Sus cesantias en el FNA pueden ser la primera cuota de una casa. Quiere saber mas? SIN COSTO, responda SI o NO	Pendiente	2018-11-22	2018-11-22
3305191	40037537	AM	3102846089	2018-11-22 10:43:24	2018-11-22 10:43:28	Sea propietario! Sus cesantias en el FNA pueden ser la primera cuota de una casa. Quiere saber mas? SIN COSTO, responda SI o NO	Pendiente	2018-11-22	2018-11-22
3308708	73430691	AM	3008107577	2018-11-22 10:43:24	2018-11-22 10:43:28	Sea propietario! Sus cesantias en el FNA pueden ser la primera cuota de una casa. Quiere saber mas? SIN COSTO, responda SI o NO	Pendiente	2018-11-22	2018-11-22
3310670	22589915	AM	3014723088	2018-11-22 10:43:24	2018-11-22 10:43:28	MERLY Sus cesantias en el FNA pueden ser la primera cuota de una casa. En 2018 financiamos 9669 clientes como Ud. Quiere saber mas? SIN COSTO, responda SI o NO	Pendiente	2018-11-22	2018-11-22
3311639	42822445	AM	3162892683	2018-11-22 10:43:24	2018-11-22 10:43:28	DORA Sus cesantias en el FNA pueden ser la primera cuota de una casa en MEDELLIN. Quiere saber mas? SIN COSTO, responda SI o NO	Pendiente	2018-11-22	2018-11-22
3319380	34559256	AM	3187763252	2018-11-22 10:43:24	2018-11-22 10:43:28	No deje pasar el tiempo. Sus cesantias en el FNA pueden ser la primera cuota de una casa. Quiere saber mas? SIN COSTO, responda SI o NO	Pendiente	2018-11-22	2018-11-22
3327756	51766463	AM	3137828778	2018-11-22 10:43:24	2018-11-22 10:43:28	CARMEN Sus cesantias en el FNA pueden ser la primera cuota de una casa para su familia. Quiere saber mas? SIN COSTO, responda SI o NO	Pendiente	2018-11-22	2018-11-22
3330267	34566068	AM	3127074482	2018-11-22 10:43:24	2018-11-22 10:43:28	Sea propietario! Sus cesantias en el FNA pueden ser la primera cuota de una casa. Quiere saber mas? SIN COSTO, responda SI o NO	Pendiente	2018-11-22	2018-11-22
3331465	23926087	AM	3115095345	2018-11-22 10:43:24	2018-11-22 10:43:28	No deje pasar el tiempo. Sus cesantias en el FNA pueden ser la primera cuota de una casa. Quiere saber mas? SIN COSTO, responda SI o NO	Pendiente	2018-11-22	2018-11-22
3331909	77017817	AM	3015467166	2018-11-22 10:43:24	2018-11-22 10:43:28	Sus cesantias en el FNA pueden ser la primera cuota de una casa en VALLEDUPAR. Quiere saber mas? SIN COSTO, responda SI o NO	Pendiente	2018-11-22	2018-11-22
5217722	75084847	AM	3187517419	2018-11-22 10:43:24	2018-11-22 10:43:28	JAIRO No deje pasar el tiempo. Sus cesantias en el FNA pueden ser la primera cuota de una casa. Quiere saber mas? SIN COSTO, responda SI o NO	Pendiente	2018-11-22	2018-11-22
5218663	30319387	AM	3148864198	2018-11-22 10:43:24	2018-11-22 10:43:28	No deje pasar el tiempo. Sus cesantias en el FNA pueden ser la primera cuota de una casa. Quiere saber mas? SIN COSTO, responda SI o NO	Pendiente	2018-11-22	2018-11-22
5223345	12748724	AM	3002778625	2018-11-22 10:43:24	2018-11-22 10:43:28	Sus cesantias en el FNA pueden ser la primera cuota de una casa para su familia. Quiere saber mas? SIN COSTO, responda SI o NO	Pendiente	2018-11-22	2018-11-22
5224898	1130623018	AM	3174488113	2018-11-22 10:43:24	2018-11-22 10:43:28	DANIELA Sea propietario! Sus cesantias en el FNA pueden ser la primera cuota de una casa. Quiere saber mas? SIN COSTO, responda SI o NO	Pendiente	2018-11-22	2018-11-22
5239820	18495378	AM	3136152319	2018-11-22 10:43:24	2018-11-22 10:43:28	Sus cesantias en el FNA pueden ser la primera cuota de una casa. Hay subsidios disponibles, preguntelos. Quiere saber mas? SIN COSTO, responda SI o NO	Pendiente	2018-11-22	2018-11-22
5253563	63296212	AM	3118995156	2018-11-22 10:43:24	2018-11-22 10:43:28	Sea propietario! Sus cesantias en el FNA pueden ser la primera cuota de una casa. Quiere saber mas? SIN COSTO, responda SI o NO	Pendiente	2018-11-22	2018-11-22
5259446	16053413	AM	3148494613	2018-11-22 10:43:24	2018-11-22 10:43:28	LUIS Sus cesantias en el FNA pueden ser la primera cuota de una casa. Hay subsidios disponibles, preguntelos. Quiere saber mas? SIN COSTO, responda SI o NO	Pendiente	2018-11-22	2018-11-22
5267403	31863152	AM	3207327764	2018-11-22 10:43:24	2018-11-22 10:43:28	YADIRA Sus cesantias en el FNA pueden ser la primera cuota de una casa. En 2018 financiamos 9669 clientes como Ud. Quiere saber mas? SIN COSTO, responda SI o NO	Pendiente	2018-11-22	2018-11-22
5269090	63544857	AM	3175339969	2018-11-22 10:43:24	2018-11-22 10:43:28	Sus cesantias en el FNA pueden ser la primera cuota de una casa. Hay subsidios disponibles, preguntelos. Quiere saber mas? SIN COSTO, responda SI o NO	Pendiente	2018-11-22	2018-11-22
5271262	37013789	AM	3003761188	2018-11-22 10:43:24	2018-11-22 10:43:28	EMILCE Sus cesantias en el FNA pueden ser la primera cuota de una casa en PASTO. Quiere saber mas? SIN COSTO, responda SI o NO	Pendiente	2018-11-22	2018-11-22
5275154	1128273188	AM	3005494196	2018-11-22 10:43:24	2018-11-22 11:22:34	Sus cesantias en el FNA pueden ser la primera cuota de una casa. Quiere saber mas? SIN COSTO, responda SI o NO	SI	2018-11-22	2018-11-22	Muchas gracias por su respuesta. Un asesor del fondo Nacional del Ahorro se comunicara con usted.
5278908	91478591	AM	3106984778	2018-11-22 10:43:24	2018-11-22 10:51:44	No deje pasar el tiempo. Sus cesantias en el FNA pueden ser la primera cuota de una casa. Quiere saber mas? SIN COSTO, responda SI o NO	SI	2018-11-22	2018-11-22	Muchas gracias por su respuesta. Un asesor del fondo Nacional del Ahorro se comunicara con usted.
5291564	43278290	AM	3105059757	2018-11-22 10:43:24	2018-11-22 10:43:28	SILVIA Sus cesantias en el FNA pueden ser la primera cuota de una casa en MEDELLIN. Quiere saber mas? SIN COSTO, responda SI o NO	Pendiente	2018-11-22	2018-11-22
10723501	79418527	AM	3154040955	2018-11-22 10:43:24	2018-11-22 10:43:28	CARLOS Sus cesantias en el FNA pueden ser la primera cuota de una casa. Hay subsidios disponibles, preguntelos. Quiere saber mas? SIN COSTO, responda SI o NO	Pendiente	2018-11-22	2018-11-22
10728462	14297110	AM	3146170090	2018-11-22 10:43:24	2018-11-22 10:43:28	JOHN Sus cesantias en el FNA pueden ser la primera cuota de una casa. Hay subsidios disponibles, preguntelos. Quiere saber mas? SIN COSTO, responda SI o NO	Pendiente	2018-11-22	2018-11-22
10763188	31930969	AM	3212419137	2018-11-22 10:43:24	2018-11-22 10:43:28	No deje pasar el tiempo. Sus cesantias en el FNA pueden ser la primera cuota de una casa. Quiere saber mas? SIN COSTO, responda SI o NO	Pendiente	2018-11-22	2018-11-22
10773121	1144027484	AM	3128225930	2018-11-22 10:43:24	2018-11-22 10:43:28	Sus cesantias en el FNA pueden ser la primera cuota de una casa para su familia. Quiere saber mas? SIN COSTO, responda SI o NO	Pendiente	2018-11-22	2018-11-22
10784873	1020427141	AM	3104068345	2018-11-22 10:43:24	2018-11-22 10:43:28	No deje pasar el tiempo. Sus cesantias en el FNA pueden ser la primera cuota de una casa. Quiere saber mas? SIN COSTO, responda SI o NO	Pendiente	2018-11-22	2018-11-22
10792158	43672311	AM	3234672217	2018-11-22 10:43:24	2018-11-22 10:43:28	ENITH Sus cesantias en el FNA pueden ser la primera cuota de una casa en MEDELLIN. Quiere saber mas? SIN COSTO, responda SI o NO	Pendiente	2018-11-22	2018-11-22
10807242	43625662	AM	3215743736	2018-11-22 10:43:24	2018-11-22 10:43:28	Sus cesantias en el FNA pueden ser la primera cuota de una casa en MEDELLIN. Quiere saber mas? SIN COSTO, responda SI o NO	Pendiente	2018-11-22	2018-11-22
10815799	43060185	AM	3005595714	2018-11-22 10:43:24	2018-11-22 10:43:28	Sus cesantias en el FNA pueden ser la primera cuota de una casa. Quiere saber mas? SIN COSTO, responda SI o NO	Pendiente	2018-11-22	2018-11-22
10817353	88227623	AM	3002071361	2018-11-22 10:43:24	2018-11-22 10:43:28	PEDRO No deje pasar el tiempo. Sus cesantias en el FNA pueden ser la primera cuota de una casa. Quiere saber mas? SIN COSTO, responda SI o NO	Pendiente	2018-11-22	2018-11-22
10828456	3221389	AM	3204074858	2018-11-22 10:43:24	2018-11-22 10:43:28	Sus cesantias en el FNA pueden ser la primera cuota de una casa. Quiere saber mas? SIN COSTO, responda SI o NO	Pendiente	2018-11-22	2018-11-22
10834830	8161763	AM	3168768400	2018-11-22 10:43:24	2018-11-22 10:45:19	JUAN Sus cesantias en el FNA pueden ser la primera cuota de una casa. En 2018 financiamos 9669 clientes como Ud. Quiere saber mas? SIN COSTO, responda SI o NO	SI	2018-11-22	2018-11-22	Muchas gracias por su respuesta. Un asesor del fondo Nacional del Ahorro se comunicara con usted.
10853163	32612878	AM	3017542244	2018-11-22 10:43:24	2018-11-22 10:44:03	Sus cesantias en el FNA pueden ser la primera cuota de una casa para su familia. Quiere saber mas? SIN COSTO, responda SI o NO	SI	2018-11-22	2018-11-22	Muchas gracias por su respuesta. Un asesor del fondo Nacional del Ahorro se comunicara con usted.
785583	29180320	AM	3173697178	2018-11-22 10:43:24	2018-11-22 10:43:28	No deje pasar el tiempo. Sus cesantias en el FNA pueden ser la primera cuota de una casa. Quiere saber mas? SIN COSTO, responda SI o NO	Pendiente	2018-11-22	2018-11-22
786121	16770647	AM	3006181486	2018-11-22 10:43:24	2018-11-22 10:43:28	JOHN Sus cesantias en el FNA pueden ser la primera cuota de una casa. En 2018 financiamos 9669 clientes como Ud. Quiere saber mas? SIN COSTO, responda SI o NO	Pendiente	2018-11-22	2018-11-22
787512	6774113	AM	3107585955	2018-11-22 10:43:24	2018-11-22 10:43:28	Sus cesantias en el FNA pueden ser la primera cuota de una casa. Hay subsidios disponibles, preguntelos. Quiere saber mas? SIN COSTO, responda SI o NO	Pendiente	2018-11-22	2018-11-22
787848	85466196	AM	3114329830	2018-11-22 10:43:24	2018-11-22 10:43:28	Sus cesantias en el FNA pueden ser la primera cuota de una casa. En 2018 financiamos 9669 clientes como Ud. Quiere saber mas? SIN COSTO, responda SI o NO	Pendiente	2018-11-22	2018-11-22
789448	9526609	AM	3188814018	2018-11-22 10:43:24	2018-11-22 10:43:28	LUIS Sus cesantias en el FNA pueden ser la primera cuota de una casa. Hay subsidios disponibles, preguntelos. Quiere saber mas? SIN COSTO, responda SI o NO	Pendiente	2018-11-22	2018-11-22
792522	79126612	AM	3103725954	2018-11-22 10:43:24	2018-11-22 10:43:28	JOSE Sus cesantias en el FNA pueden ser la primera cuota de una casa en DUITAMA. Quiere saber mas? SIN COSTO, responda SI o NO	Pendiente	2018-11-22	2018-11-22
793770	16696204	AM	3154352535	2018-11-22 10:43:24	2018-11-22 10:43:28	Sea propietario! Sus cesantias en el FNA pueden ser la primera cuota de una casa. Quiere saber mas? SIN COSTO, responda SI o NO	Pendiente	2018-11-22	2018-11-22
795237	46362718	AM	3133488599	2018-11-22 10:43:24	2018-11-22 10:43:28	FLOR Sea propietario! Sus cesantias en el FNA pueden ser la primera cuota de una casa. Quiere saber mas? SIN COSTO, responda SI o NO	Pendiente	2018-11-22	2018-11-22
797626	8163884	AM	3212055168	2018-11-22 10:43:24	2018-11-22 10:43:28	LEONARDO Sus cesantias en el FNA pueden ser la primera cuota de una casa. En 2018 financiamos 9669 clientes como Ud. Quiere saber mas? SIN COSTO, responda SI o NO	Pendiente	2018-11-22	2018-11-22
800431	19473985	AM	3008158510	2018-11-22 10:43:24	2018-11-22 10:43:28	JORGE Sus cesantias en el FNA pueden ser la primera cuota de una casa. Hay subsidios disponibles, preguntelos. Quiere saber mas? SIN COSTO, responda SI o NO	Pendiente	2018-11-22	2018-11-22
800804	70564336	AM	3116259702	2018-11-22 10:43:24	2018-11-22 13:15:46	LUIS Sus cesantias en el FNA pueden ser la primera cuota de una casa. Hay subsidios disponibles, preguntelos. Quiere saber mas? SIN COSTO, responda SI o NO	SI	2018-11-22	2018-11-22	Muchas gracias por su respuesta. Un asesor del fondo Nacional del Ahorro se comunicara con usted.
802016	70075390	AM	3125591623	2018-11-22 10:43:24	2018-11-22 10:43:28	Sus cesantias en el FNA pueden ser la primera cuota de una casa. Hay subsidios disponibles, preguntelos. Quiere saber mas? SIN COSTO, responda SI o NO	Pendiente	2018-11-22	2018-11-22
805221	10542079	AM	3176576596	2018-11-22 10:43:24	2018-11-22 10:43:28	Sus cesantias en el FNA pueden ser la primera cuota de una casa para su familia. Quiere saber mas? SIN COSTO, responda SI o NO	Pendiente	2018-11-22	2018-11-22
812243	17346850	AM	3108189443	2018-11-22 10:43:24	2018-11-22 10:43:28	ALFONSO No deje pasar el tiempo. Sus cesantias en el FNA pueden ser la primera cuota de una casa. Quiere saber mas? SIN COSTO, responda SI o NO	Pendiente	2018-11-22	2018-11-22
812691	13862138	AM	3002412610	2018-11-22 10:43:24	2018-11-22 10:43:28	No deje pasar el tiempo. Sus cesantias en el FNA pueden ser la primera cuota de una casa. Quiere saber mas? SIN COSTO, responda SI o NO	Pendiente	2018-11-22	2018-11-22
813109	40398756	AM	3143703038	2018-11-22 10:43:24	2018-11-22 10:43:28	MARIA Sus cesantias en el FNA pueden ser la primera cuota de una casa para su familia. Quiere saber mas? SIN COSTO, responda SI o NO	Pendiente	2018-11-22	2018-11-22
816150	12982053	AM	3208302903	2018-11-22 10:43:24	2018-11-22 10:43:28	Sea propietario! Sus cesantias en el FNA pueden ser la primera cuota de una casa. Quiere saber mas? SIN COSTO, responda SI o NO	Pendiente	2018-11-22	2018-11-22
818968	7553304	AM	3152479370	2018-11-22 10:43:24	2018-11-22 10:43:28	Sus cesantias en el FNA pueden ser la primera cuota de una casa. Hay subsidios disponibles, preguntelos. Quiere saber mas? SIN COSTO, responda SI o NO	Pendiente	2018-11-22	2018-11-22
821930	10276596	AM	3117617718	2018-11-22 10:43:24	2018-11-22 10:43:28	CARLOS Sea propietario! Sus cesantias en el FNA pueden ser la primera cuota de una casa. Quiere saber mas? SIN COSTO, responda SI o NO	Pendiente	2018-11-22	2018-11-22
823058	59826555	AM	3154202632	2018-11-22 10:43:24	2018-11-22 10:43:28	CLAUDIA No deje pasar el tiempo. Sus cesantias en el FNA pueden ser la primera cuota de una casa. Quiere saber mas? SIN COSTO, responda SI o NO	Pendiente	2018-11-22	2018-11-22
824045	63483892	AM	3118209820	2018-11-22 10:43:24	2018-11-22 10:43:28	ELDA Sea propietario! Sus cesantias en el FNA pueden ser la primera cuota de una casa. Quiere saber mas? SIN COSTO, responda SI o NO	Pendiente	2018-11-22	2018-11-22
829266	11411175	AM	3168322502	2018-11-22 10:43:24	2018-11-22 10:43:28	Sus cesantias en el FNA pueden ser la primera cuota de una casa. En 2018 financiamos 9669 clientes como Ud. Quiere saber mas? SIN COSTO, responda SI o NO	Pendiente	2018-11-22	2018-11-22
831563	59821613	AM	3006594783	2018-11-22 10:43:24	2018-11-22 10:43:28	Sus cesantias en el FNA pueden ser la primera cuota de una casa. Quiere saber mas? SIN COSTO, responda SI o NO	Pendiente	2018-11-22	2018-11-22
832627	13636122	AM	3006556285	2018-11-22 10:43:24	2018-11-22 10:43:28	JUAN Sus cesantias en el FNA pueden ser la primera cuota de una casa para su familia. Quiere saber mas? SIN COSTO, responda SI o NO	Pendiente	2018-11-22	2018-11-22
835040	34559133	AM	3232930527	2018-11-22 10:43:24	2018-11-22 10:43:28	Sus cesantias en el FNA pueden ser la primera cuota de una casa. En 2018 financiamos 9669 clientes como Ud. Quiere saber mas? SIN COSTO, responda SI o NO	Pendiente	2018-11-22	2018-11-22
2276560	63294283	AM	3108069247	2018-11-22 10:43:24	2018-11-22 10:43:28	MYLADY Sus cesantias en el FNA pueden ser la primera cuota de una casa en BARRANQUILLA. Quiere saber mas? SIN COSTO, responda SI o NO	Pendiente	2018-11-22	2018-11-22
2278146	10542239	AM	3117040832	2018-11-22 10:43:24	2018-11-22 10:43:28	Sus cesantias en el FNA pueden ser la primera cuota de una casa. Hay subsidios disponibles, preguntelos. Quiere saber mas? SIN COSTO, responda SI o NO	Pendiente	2018-11-22	2018-11-22
2287154	32255108	AM	3167583631	2018-11-22 10:43:24	2018-11-22 10:43:28	MARILUZ Sea propietario! Sus cesantias en el FNA pueden ser la primera cuota de una casa. Quiere saber mas? SIN COSTO, responda SI o NO	Pendiente	2018-11-22	2018-11-22
2300982	22691450	AM	3008334296	2018-11-22 10:43:24	2018-11-22 10:43:28	GLORIA No deje pasar el tiempo. Sus cesantias en el FNA pueden ser la primera cuota de una casa. Quiere saber mas? SIN COSTO, responda SI o NO	Pendiente	2018-11-22	2018-11-22
2305776	36069298	AM	3138892601	2018-11-22 10:43:24	2018-11-22 10:43:28	Sea propietario! Sus cesantias en el FNA pueden ser la primera cuota de una casa. Quiere saber mas? SIN COSTO, responda SI o NO	Pendiente	2018-11-22	2018-11-22
2306990	72250382	AM	3145811364	2018-11-22 10:43:24	2018-11-22 10:43:28	Sus cesantias en el FNA pueden ser la primera cuota de una casa para su familia. Quiere saber mas? SIN COSTO, responda SI o NO	Pendiente	2018-11-22	2018-11-22
2310119	94410552	AM	3114351497	2018-11-22 10:43:24	2018-11-22 10:43:28	Sus cesantias en el FNA pueden ser la primera cuota de una casa. En 2018 financiamos 9669 clientes como Ud. Quiere saber mas? SIN COSTO, responda SI o NO	Pendiente	2018-11-22	2018-11-22
2314479	4423691	AM	3117504067	2018-11-22 10:43:24	2018-11-22 10:43:28	No deje pasar el tiempo. Sus cesantias en el FNA pueden ser la primera cuota de una casa. Quiere saber mas? SIN COSTO, responda SI o NO	Pendiente	2018-11-22	2018-11-22
2318744	42896227	AM	3105330019	2018-11-22 10:43:24	2018-11-22 10:43:28	No deje pasar el tiempo. Sus cesantias en el FNA pueden ser la primera cuota de una casa. Quiere saber mas? SIN COSTO, responda SI o NO	Pendiente	2018-11-22	2018-11-22
2323089	77190879	AM	3008221704	2018-11-22 10:43:24	2018-11-22 10:43:28	JHON Sus cesantias en el FNA pueden ser la primera cuota de una casa para su familia. Quiere saber mas? SIN COSTO, responda SI o NO	Pendiente	2018-11-22	2018-11-22
2334745	50919834	AM	3212411483	2018-11-22 10:43:24	2018-11-22 10:43:28	Sus cesantias en el FNA pueden ser la primera cuota de una casa. Quiere saber mas? SIN COSTO, responda SI o NO	Pendiente	2018-11-22	2018-11-22
2339445	65739232	AM	3153514064	2018-11-22 10:43:24	2018-11-22 10:43:28	Sus cesantias en el FNA pueden ser la primera cuota de una casa. En 2018 financiamos 9669 clientes como Ud. Quiere saber mas? SIN COSTO, responda SI o NO	Pendiente	2018-11-22	2018-11-22
2341104	5400424	AM	3133517056	2018-11-22 10:43:24	2018-11-22 10:43:28	Sea propietario! Sus cesantias en el FNA pueden ser la primera cuota de una casa. Quiere saber mas? SIN COSTO, responda SI o NO	Pendiente	2018-11-22	2018-11-22
2349489	32322964	AM	3176548122	2018-11-22 10:43:24	2018-11-22 10:44:39	MARIA Sea propietario! Sus cesantias en el FNA pueden ser la primera cuota de una casa. Quiere saber mas? SIN COSTO, responda SI o NO	SI	2018-11-22	2018-11-22	Muchas gracias por su respuesta. Un asesor del fondo Nacional del Ahorro se comunicara con usted.
2355778	86058871	AM	3124305508	2018-11-22 10:43:24	2018-11-22 10:43:28	Sus cesantias en el FNA pueden ser la primera cuota de una casa. Quiere saber mas? SIN COSTO, responda SI o NO	Pendiente	2018-11-22	2018-11-22
2359435	7171165	AM	3124532438	2018-11-22 10:43:24	2018-11-22 10:43:28	VICTOR Sus cesantias en el FNA pueden ser la primera cuota de una casa. Hay subsidios disponibles, preguntelos. Quiere saber mas? SIN COSTO, responda SI o NO	Pendiente	2018-11-22	2018-11-22
4496390	66855732	AM	3128480568	2018-11-22 10:43:24	2018-11-22 10:43:28	VIRGINIA Sea propietario! Sus cesantias en el FNA pueden ser la primera cuota de una casa. Quiere saber mas? SIN COSTO, responda SI o NO	Pendiente	2018-11-22	2018-11-22
4497552	1085254740	AM	3147463785	2018-11-22 10:43:24	2018-11-22 13:15:34	ANA No deje pasar el tiempo. Sus cesantias en el FNA pueden ser la primera cuota de una casa. Quiere saber mas? SIN COSTO, responda SI o NO	SI	2018-11-22	2018-11-22	Muchas gracias por su respuesta. Un asesor del fondo Nacional del Ahorro se comunicara con usted.
4501194	1081905996	AM	3106013411	2018-11-22 10:43:24	2018-11-22 10:43:55	Sea propietario! Sus cesantias en el FNA pueden ser la primera cuota de una casa. Quiere saber mas? SIN COSTO, responda SI o NO	SI	2018-11-22	2018-11-22	Muchas gracias por su respuesta. Un asesor del fondo Nacional del Ahorro se comunicara con usted.
4508682	98385986	AM	3168316884	2018-11-22 10:43:24	2018-11-22 10:43:28	Sus cesantias en el FNA pueden ser la primera cuota de una casa. Quiere saber mas? SIN COSTO, responda SI o NO	Pendiente	2018-11-22	2018-11-22
4513598	91110351	AM	3106185285	2018-11-22 10:43:24	2018-11-22 10:43:28	CARLOS Sus cesantias en el FNA pueden ser la primera cuota de una casa en BUCARAMANGA. Quiere saber mas? SIN COSTO, responda SI o NO	Pendiente	2018-11-22	2018-11-22
4521824	1090426065	AM	3103041053	2018-11-22 10:43:24	2018-11-22 10:43:28	KAREN Sus cesantias en el FNA pueden ser la primera cuota de una casa. En 2018 financiamos 9669 clientes como Ud. Quiere saber mas? SIN COSTO, responda SI o NO	Pendiente	2018-11-22	2018-11-22
4533596	38362363	AM	3046563274	2018-11-22 10:43:24	2018-11-22 10:43:28	KARLA Sus cesantias en el FNA pueden ser la primera cuota de una casa para su familia. Quiere saber mas? SIN COSTO, responda SI o NO	Pendiente	2018-11-22	2018-11-22
4536347	64567435	AM	3116732553	2018-11-22 10:43:24	2018-11-22 10:43:28	No deje pasar el tiempo. Sus cesantias en el FNA pueden ser la primera cuota de una casa. Quiere saber mas? SIN COSTO, responda SI o NO	Pendiente	2018-11-22	2018-11-22
4539846	1098647304	AM	3173636127	2018-11-22 10:43:24	2018-11-22 10:43:28	ANDREA Sus cesantias en el FNA pueden ser la primera cuota de una casa en BUCARAMANGA. Quiere saber mas? SIN COSTO, responda SI o NO	Pendiente	2018-11-22	2018-11-22
4559691	72185883	AM	3045519157	2018-11-22 10:43:24	2018-11-22 10:43:28	Sus cesantias en el FNA pueden ser la primera cuota de una casa en BARRANQUILLA. Quiere saber mas? SIN COSTO, responda SI o NO	Pendiente	2018-11-22	2018-11-22
4561653	36559611	AM	3163623597	2018-11-22 10:43:24	2018-11-22 10:43:28	Sus cesantias en el FNA pueden ser la primera cuota de una casa en MEDELLIN. Quiere saber mas? SIN COSTO, responda SI o NO	Pendiente	2018-11-22	2018-11-22
4568103	27087895	AM	3155833496	2018-11-22 10:43:24	2018-11-22 11:13:03	ADRIANA No deje pasar el tiempo. Sus cesantias en el FNA pueden ser la primera cuota de una casa. Quiere saber mas? SIN COSTO, responda SI o NO	SI	2018-11-22	2018-11-22	Muchas gracias por su respuesta. Un asesor del fondo Nacional del Ahorro se comunicara con usted.
4574129	35895164	AM	3207100117	2018-11-22 10:43:24	2018-11-22 10:43:28	Sus cesantias en el FNA pueden ser la primera cuota de una casa para su familia. Quiere saber mas? SIN COSTO, responda SI o NO	Pendiente	2018-11-22	2018-11-22
4579190	73154298	AM	3157388188	2018-11-22 10:43:24	2018-11-22 10:43:28	EDGAR Sus cesantias en el FNA pueden ser la primera cuota de una casa. Hay subsidios disponibles, preguntelos. Quiere saber mas? SIN COSTO, responda SI o NO	Pendiente	2018-11-22	2018-11-22
4579488	86087686	AM	3208003198	2018-11-22 10:43:24	2018-11-22 10:43:28	MIGUEL No deje pasar el tiempo. Sus cesantias en el FNA pueden ser la primera cuota de una casa. Quiere saber mas? SIN COSTO, responda SI o NO	Pendiente	2018-11-22	2018-11-22
4579547	49717628	AM	3135151264	2018-11-22 10:43:24	2018-11-22 10:43:28	Sus cesantias en el FNA pueden ser la primera cuota de una casa. En 2018 financiamos 9669 clientes como Ud. Quiere saber mas? SIN COSTO, responda SI o NO	Pendiente	2018-11-22	2018-11-22
4586623	59823170	AM	3148940427	2018-11-22 10:43:24	2018-11-22 10:43:28	Sus cesantias en el FNA pueden ser la primera cuota de una casa. Quiere saber mas? SIN COSTO, responda SI o NO	Pendiente	2018-11-22	2018-11-22
4590314	2757153	AM	3116584118	2018-11-22 10:43:24	2018-11-22 10:43:28	JONAS No deje pasar el tiempo. Sus cesantias en el FNA pueden ser la primera cuota de una casa. Quiere saber mas? SIN COSTO, responda SI o NO	Pendiente	2018-11-22	2018-11-22
4591338	1098652026	AM	3002454418	2018-11-22 10:43:24	2018-11-22 10:43:28	Sus cesantias en el FNA pueden ser la primera cuota de una casa para su familia. Quiere saber mas? SIN COSTO, responda SI o NO	Pendiente	2018-11-22	2018-11-22
6372222	43848329	AM	3117752074	2018-11-22 10:43:24	2018-11-22 10:43:28	Sus cesantias en el FNA pueden ser la primera cuota de una casa para su familia. Quiere saber mas? SIN COSTO, responda SI o NO	Pendiente	2018-11-22	2018-11-22
6377870	70138159	AM	3016593435	2018-11-22 10:43:24	2018-11-22 10:43:28	No deje pasar el tiempo. Sus cesantias en el FNA pueden ser la primera cuota de una casa. Quiere saber mas? SIN COSTO, responda SI o NO	Pendiente	2018-11-22	2018-11-22
6380217	80024072	AM	3203451698	2018-11-22 10:43:24	2018-11-22 10:43:28	Sea propietario! Sus cesantias en el FNA pueden ser la primera cuota de una casa. Quiere saber mas? SIN COSTO, responda SI o NO	Pendiente	2018-11-22	2018-11-22
6385944	9866919	AM	3152290473	2018-11-22 10:43:24	2018-11-22 10:43:28	No deje pasar el tiempo. Sus cesantias en el FNA pueden ser la primera cuota de una casa. Quiere saber mas? SIN COSTO, responda SI o NO	Pendiente	2018-11-22	2018-11-22
6387236	73149323	AM	3183728123	2018-11-22 10:43:24	2018-11-22 12:08:04	HAVID No deje pasar el tiempo. Sus cesantias en el FNA pueden ser la primera cuota de una casa. Quiere saber mas? SIN COSTO, responda SI o NO	SI	2018-11-22	2018-11-22	Muchas gracias por su respuesta. Un asesor del fondo Nacional del Ahorro se comunicara con usted.
6393594	63490567	AM	3173208295	2018-11-22 10:43:24	2018-11-22 10:43:28	No deje pasar el tiempo. Sus cesantias en el FNA pueden ser la primera cuota de una casa. Quiere saber mas? SIN COSTO, responda SI o NO	Pendiente	2018-11-22	2018-11-22
6394809	31962280	AM	3165261210	2018-11-22 10:43:24	2018-11-22 10:43:28	CLAUDIA Sus cesantias en el FNA pueden ser la primera cuota de una casa para su familia. Quiere saber mas? SIN COSTO, responda SI o NO	Pendiente	2018-11-22	2018-11-22
6401599	24334183	AM	3017439789	2018-11-22 10:43:24	2018-11-22 10:43:28	No deje pasar el tiempo. Sus cesantias en el FNA pueden ser la primera cuota de una casa. Quiere saber mas? SIN COSTO, responda SI o NO	Pendiente	2018-11-22	2018-11-22
6409701	1152442903	AM	3137858329	2018-11-22 10:43:24	2018-11-22 17:27:09	DIANA Sus cesantias en el FNA pueden ser la primera cuota de una casa para su familia. Quiere saber mas? SIN COSTO, responda SI o NO	SI	2018-11-22	2018-11-22	Muchas gracias por su respuesta. Un asesor del fondo Nacional del Ahorro se comunicara con usted.
6418425	1130668916	AM	3116283376	2018-11-22 10:43:24	2018-11-22 10:43:28	Sus cesantias en el FNA pueden ser la primera cuota de una casa. Hay subsidios disponibles, preguntelos. Quiere saber mas? SIN COSTO, responda SI o NO	Pendiente	2018-11-22	2018-11-22
6428805	31573712	AM	3168956551	2018-11-22 10:43:24	2018-11-22 10:43:28	ERIKA Sus cesantias en el FNA pueden ser la primera cuota de una casa. En 2018 financiamos 9669 clientes como Ud. Quiere saber mas? SIN COSTO, responda SI o NO	Pendiente	2018-11-22	2018-11-22
6429102	16611211	AM	3178446310	2018-11-22 10:43:24	2018-11-22 10:43:28	Sus cesantias en el FNA pueden ser la primera cuota de una casa. En 2018 financiamos 9669 clientes como Ud. Quiere saber mas? SIN COSTO, responda SI o NO	Pendiente	2018-11-22	2018-11-22
6432423	17293166	AM	3126148516	2018-11-22 10:43:24	2018-11-22 11:01:11	JOSE Sea propietario! Sus cesantias en el FNA pueden ser la primera cuota de una casa. Quiere saber mas? SIN COSTO, responda SI o NO	SI	2018-11-22	2018-11-22	Muchas gracias por su respuesta. Un asesor del fondo Nacional del Ahorro se comunicara con usted.
6437071	94519361	AM	3157926886	2018-11-22 10:43:24	2018-11-22 10:43:28	HERIBERTO Sus cesantias en el FNA pueden ser la primera cuota de una casa. Hay subsidios disponibles, preguntelos. Quiere saber mas? SIN COSTO, responda SI o NO	Pendiente	2018-11-22	2018-11-22
6439356	16695489	AM	3162844665	2018-11-22 10:43:24	2018-11-22 10:43:28	No deje pasar el tiempo. Sus cesantias en el FNA pueden ser la primera cuota de una casa. Quiere saber mas? SIN COSTO, responda SI o NO	Pendiente	2018-11-22	2018-11-22
6448351	42762971	AM	3005415254	2018-11-22 10:43:24	2018-11-22 10:43:28	Sus cesantias en el FNA pueden ser la primera cuota de una casa en MEDELLIN. Quiere saber mas? SIN COSTO, responda SI o NO	Pendiente	2018-11-22	2018-11-22
6451041	98393947	AM	3012646536	2018-11-22 10:43:24	2018-11-22 10:43:28	Sus cesantias en el FNA pueden ser la primera cuota de una casa. Quiere saber mas? SIN COSTO, responda SI o NO	Pendiente	2018-11-22	2018-11-22
6455226	12548393	AM	3116818116	2018-11-22 10:43:24	2018-11-22 10:43:28	Sus cesantias en el FNA pueden ser la primera cuota de una casa. Quiere saber mas? SIN COSTO, responda SI o NO	Pendiente	2018-11-22	2018-11-22
6457336	57270931	AM	3186238399	2018-11-22 10:43:24	2018-11-22 10:44:05	CATERINE Sus cesantias en el FNA pueden ser la primera cuota de una casa en SANTA MARTA. Quiere saber mas? SIN COSTO, responda SI o NO	SI	2018-11-22	2018-11-22	Muchas gracias por su respuesta. Un asesor del fondo Nacional del Ahorro se comunicara con usted.
6466015	40392923	AM	3115213209	2018-11-22 10:43:24	2018-11-22 10:43:28	Sus cesantias en el FNA pueden ser la primera cuota de una casa para su familia. Quiere saber mas? SIN COSTO, responda SI o NO	Pendiente	2018-11-22	2018-11-22
6474668	5822083	AM	3217004202	2018-11-22 10:43:24	2018-11-22 10:43:28	HEBER Sea propietario! Sus cesantias en el FNA pueden ser la primera cuota de una casa. Quiere saber mas? SIN COSTO, responda SI o NO	Pendiente	2018-11-22	2018-11-22
840411	29184675	AM	3116470377	2018-11-22 10:43:24	2018-11-22 10:43:28	MARIA No deje pasar el tiempo. Sus cesantias en el FNA pueden ser la primera cuota de una casa. Quiere saber mas? SIN COSTO, responda SI o NO	Pendiente	2018-11-22	2018-11-22
844419	91242863	AM	3138005555	2018-11-22 10:43:24	2018-11-22 10:43:28	JOAQUIN Sea propietario! Sus cesantias en el FNA pueden ser la primera cuota de una casa. Quiere saber mas? SIN COSTO, responda SI o NO	Pendiente	2018-11-22	2018-11-22
844832	6002657	AM	3112388600	2018-11-22 10:43:24	2018-11-22 13:37:54	CARLOS Sus cesantias en el FNA pueden ser la primera cuota de una casa en IBAGUE. Quiere saber mas? SIN COSTO, responda SI o NO	SI	2018-11-22	2018-11-22	Muchas gracias por su respuesta. Un asesor del fondo Nacional del Ahorro se comunicara con usted.
846511	66859774	AM	3116176793	2018-11-22 10:43:24	2018-11-22 10:43:28	MARIA Sea propietario! Sus cesantias en el FNA pueden ser la primera cuota de una casa. Quiere saber mas? SIN COSTO, responda SI o NO	Pendiente	2018-11-22	2018-11-22
846549	56092017	AM	3008087236	2018-11-22 10:43:24	2018-11-22 10:43:28	Sus cesantias en el FNA pueden ser la primera cuota de una casa en BARRANQUILLA. Quiere saber mas? SIN COSTO, responda SI o NO	Pendiente	2018-11-22	2018-11-22
849703	16917032	AM	3132081894	2018-11-22 10:43:24	2018-11-22 10:43:28	LIBARDO No deje pasar el tiempo. Sus cesantias en el FNA pueden ser la primera cuota de una casa. Quiere saber mas? SIN COSTO, responda SI o NO	Pendiente	2018-11-22	2018-11-22
852860	72244667	AM	3003857920	2018-11-22 10:43:24	2018-11-22 10:43:28	No deje pasar el tiempo. Sus cesantias en el FNA pueden ser la primera cuota de una casa. Quiere saber mas? SIN COSTO, responda SI o NO	Pendiente	2018-11-22	2018-11-22
855725	26694770	AM	3126331722	2018-11-22 10:43:24	2018-11-22 10:43:28	SANDRA Sus cesantias en el FNA pueden ser la primera cuota de una casa en BARRANQUILLA. Quiere saber mas? SIN COSTO, responda SI o NO	Pendiente	2018-11-22	2018-11-22
857099	5450627	AM	3143866519	2018-11-22 10:43:24	2018-11-22 10:43:28	LUIS Sus cesantias en el FNA pueden ser la primera cuota de una casa. En 2018 financiamos 9669 clientes como Ud. Quiere saber mas? SIN COSTO, responda SI o NO	Pendiente	2018-11-22	2018-11-22
858984	86065501	AM	3103487697	2018-11-22 10:43:24	2018-11-22 10:43:28	WILMER Sus cesantias en el FNA pueden ser la primera cuota de una casa. En 2018 financiamos 9669 clientes como Ud. Quiere saber mas? SIN COSTO, responda SI o NO	Pendiente	2018-11-22	2018-11-22
859705	7685309	AM	3137910373	2018-11-22 10:43:24	2018-11-22 10:43:28	Sus cesantias en el FNA pueden ser la primera cuota de una casa. En 2018 financiamos 9669 clientes como Ud. Quiere saber mas? SIN COSTO, responda SI o NO	Pendiente	2018-11-22	2018-11-22
862912	78034494	AM	3116852452	2018-11-22 10:43:24	2018-11-22 10:43:28	Sus cesantias en el FNA pueden ser la primera cuota de una casa en MONTERIA. Quiere saber mas? SIN COSTO, responda SI o NO	Pendiente	2018-11-22	2018-11-22
865406	77034338	AM	3135381965	2018-11-22 10:43:24	2018-11-22 10:43:28	ANDRES Sus cesantias en el FNA pueden ser la primera cuota de una casa. En 2018 financiamos 9669 clientes como Ud. Quiere saber mas? SIN COSTO, responda SI o NO	Pendiente	2018-11-22	2018-11-22
868134	12975080	AM	3164951473	2018-11-22 10:43:24	2018-11-22 10:43:28	HERNANDO Sus cesantias en el FNA pueden ser la primera cuota de una casa. En 2018 financiamos 9669 clientes como Ud. Quiere saber mas? SIN COSTO, responda SI o NO	Pendiente	2018-11-22	2018-11-22
870643	22443463	AM	3008045777	2018-11-22 10:43:24	2018-11-22 10:43:28	CLAUDIA Sus cesantias en el FNA pueden ser la primera cuota de una casa para su familia. Quiere saber mas? SIN COSTO, responda SI o NO	Pendiente	2018-11-22	2018-11-22
873277	79900952	AM	3142659559	2018-11-22 10:43:24	2018-11-22 10:43:28	No deje pasar el tiempo. Sus cesantias en el FNA pueden ser la primera cuota de una casa. Quiere saber mas? SIN COSTO, responda SI o NO	Pendiente	2018-11-22	2018-11-22
873633	30730465	AM	3006173278	2018-11-22 10:43:24	2018-11-22 12:00:56	Sea propietario! Sus cesantias en el FNA pueden ser la primera cuota de una casa. Quiere saber mas? SIN COSTO, responda SI o NO	SI	2018-11-22	2018-11-22	Muchas gracias por su respuesta. Un asesor del fondo Nacional del Ahorro se comunicara con usted.
874053	16796530	AM	3113081442	2018-11-22 10:43:24	2018-11-22 10:43:28	DIEGO Sus cesantias en el FNA pueden ser la primera cuota de una casa. En 2018 financiamos 9669 clientes como Ud. Quiere saber mas? SIN COSTO, responda SI o NO	Pendiente	2018-11-22	2018-11-22
877930	36726202	AM	3006573632	2018-11-22 10:43:24	2018-11-22 10:43:28	Sus cesantias en el FNA pueden ser la primera cuota de una casa. En 2018 financiamos 9669 clientes como Ud. Quiere saber mas? SIN COSTO, responda SI o NO	Pendiente	2018-11-22	2018-11-22
879110	30331819	AM	3122280279	2018-11-22 10:43:24	2018-11-22 10:43:28	ROSANA No deje pasar el tiempo. Sus cesantias en el FNA pueden ser la primera cuota de una casa. Quiere saber mas? SIN COSTO, responda SI o NO	Pendiente	2018-11-22	2018-11-22
879747	15172386	AM	3015689350	2018-11-22 10:43:24	2018-11-22 10:54:17	PABLO Sus cesantias en el FNA pueden ser la primera cuota de una casa. Hay subsidios disponibles, preguntelos. Quiere saber mas? SIN COSTO, responda SI o NO	SI	2018-11-22	2018-11-22	Muchas gracias por su respuesta. Un asesor del fondo Nacional del Ahorro se comunicara con usted.
880447	60302898	AM	3164670077	2018-11-22 10:43:24	2018-11-22 10:43:28	CARMEN Sus cesantias en el FNA pueden ser la primera cuota de una casa. En 2018 financiamos 9669 clientes como Ud. Quiere saber mas? SIN COSTO, responda SI o NO	Pendiente	2018-11-22	2018-11-22
883020	52379502	AM	3114747848	2018-11-22 10:43:24	2018-11-22 10:43:28	IVONNE No deje pasar el tiempo. Sus cesantias en el FNA pueden ser la primera cuota de una casa. Quiere saber mas? SIN COSTO, responda SI o NO	Pendiente	2018-11-22	2018-11-22
883522	52583026	AM	3147928508	2018-11-22 10:43:24	2018-11-22 10:43:28	MARIA Sus cesantias en el FNA pueden ser la primera cuota de una casa para su familia. Quiere saber mas? SIN COSTO, responda SI o NO	Pendiente	2018-11-22	2018-11-22
886347	30733332	AM	3007845273	2018-11-22 10:43:24	2018-11-22 10:43:28	Sea propietario! Sus cesantias en el FNA pueden ser la primera cuota de una casa. Quiere saber mas? SIN COSTO, responda SI o NO	Pendiente	2018-11-22	2018-11-22
887449	32728377	AM	3015649472	2018-11-22 10:43:24	2018-11-22 10:43:28	Sus cesantias en el FNA pueden ser la primera cuota de una casa. En 2018 financiamos 9669 clientes como Ud. Quiere saber mas? SIN COSTO, responda SI o NO	Pendiente	2018-11-22	2018-11-22
891374	98396580	AM	3138871137	2018-11-22 10:43:24	2018-11-22 10:43:28	Sus cesantias en el FNA pueden ser la primera cuota de una casa. En 2018 financiamos 9669 clientes como Ud. Quiere saber mas? SIN COSTO, responda SI o NO	Pendiente	2018-11-22	2018-11-22
891889	30318003	AM	3103977403	2018-11-22 10:43:24	2018-11-22 10:43:28	ANA No deje pasar el tiempo. Sus cesantias en el FNA pueden ser la primera cuota de una casa. Quiere saber mas? SIN COSTO, responda SI o NO	Pendiente	2018-11-22	2018-11-22
2368076	37750767	AM	3173675474	2018-11-22 10:43:24	2018-11-22 16:42:15	MONICA Sus cesantias en el FNA pueden ser la primera cuota de una casa. Hay subsidios disponibles, preguntelos. Quiere saber mas? SIN COSTO, responda SI o NO	SI	2018-11-22	2018-11-22	Muchas gracias por su respuesta. Un asesor del fondo Nacional del Ahorro se comunicara con usted.
2373368	40040720	AM	3103336856	2018-11-22 10:43:24	2018-11-22 10:43:28	CLAUDIA Sus cesantias en el FNA pueden ser la primera cuota de una casa para su familia. Quiere saber mas? SIN COSTO, responda SI o NO	Pendiente	2018-11-22	2018-11-22
2382264	38866866	AM	3111594473	2018-11-22 10:43:24	2018-11-22 10:43:28	ORFA Sus cesantias en el FNA pueden ser la primera cuota de una casa para su familia. Quiere saber mas? SIN COSTO, responda SI o NO	Pendiente	2018-11-22	2018-11-22
2390715	66863313	AM	3207833448	2018-11-22 10:43:24	2018-11-22 10:43:28	Sus cesantias en el FNA pueden ser la primera cuota de una casa en MANIZALES. Quiere saber mas? SIN COSTO, responda SI o NO	Pendiente	2018-11-22	2018-11-22
2393358	77090196	AM	3014443164	2018-11-22 10:43:24	2018-11-22 10:43:28	Sus cesantias en el FNA pueden ser la primera cuota de una casa. Quiere saber mas? SIN COSTO, responda SI o NO	Pendiente	2018-11-22	2018-11-22
2394081	18469404	AM	3146423872	2018-11-22 10:43:24	2018-11-22 10:43:28	Sus cesantias en el FNA pueden ser la primera cuota de una casa. Hay subsidios disponibles, preguntelos. Quiere saber mas? SIN COSTO, responda SI o NO	Pendiente	2018-11-22	2018-11-22
2397779	98646951	AM	3216478317	2018-11-22 10:43:24	2018-11-22 10:43:28	CAMILO Sus cesantias en el FNA pueden ser la primera cuota de una casa. Hay subsidios disponibles, preguntelos. Quiere saber mas? SIN COSTO, responda SI o NO	Pendiente	2018-11-22	2018-11-22
2398021	79642955	AM	3206863283	2018-11-22 10:43:24	2018-11-22 10:43:28	LUIS Sus cesantias en el FNA pueden ser la primera cuota de una casa en CALI. Quiere saber mas? SIN COSTO, responda SI o NO	Pendiente	2018-11-22	2018-11-22
2398276	9096978	AM	3205123200	2018-11-22 10:43:24	2018-11-22 10:43:28	JOSE Sus cesantias en el FNA pueden ser la primera cuota de una casa. Hay subsidios disponibles, preguntelos. Quiere saber mas? SIN COSTO, responda SI o NO	Pendiente	2018-11-22	2018-11-22
2399122	12962858	AM	3162562563	2018-11-22 10:43:24	2018-11-22 10:43:28	Sus cesantias en el FNA pueden ser la primera cuota de una casa para su familia. Quiere saber mas? SIN COSTO, responda SI o NO	Pendiente	2018-11-22	2018-11-22
2401834	24347303	AM	3128221844	2018-11-22 10:43:24	2018-11-22 22:05:45	SANDRA Sus cesantias en el FNA pueden ser la primera cuota de una casa en MANIZALES. Quiere saber mas? SIN COSTO, responda SI o NO	Pendiente	2018-11-22	2018-11-22	Muchas gracias por su respuesta. Un asesor del fondo Nacional del Ahorro se comunicara con usted.	Si
2405679	98394397	AM	3103899764	2018-11-22 10:43:24	2018-11-22 10:43:28	Sus cesantias en el FNA pueden ser la primera cuota de una casa. En 2018 financiamos 9669 clientes como Ud. Quiere saber mas? SIN COSTO, responda SI o NO	Pendiente	2018-11-22	2018-11-22
2407288	87067842	AM	3117570283	2018-11-22 10:43:24	2018-11-22 10:43:28	HERMES Sea propietario! Sus cesantias en el FNA pueden ser la primera cuota de una casa. Quiere saber mas? SIN COSTO, responda SI o NO	Pendiente	2018-11-22	2018-11-22
2421392	38252239	AM	3124578303	2018-11-22 10:43:24	2018-11-22 10:43:28	MARIA Sus cesantias en el FNA pueden ser la primera cuota de una casa. Hay subsidios disponibles, preguntelos. Quiere saber mas? SIN COSTO, responda SI o NO	Pendiente	2018-11-22	2018-11-22
2422567	59828919	AM	3177001743	2018-11-22 10:43:24	2018-11-22 10:43:28	SANDRA No deje pasar el tiempo. Sus cesantias en el FNA pueden ser la primera cuota de una casa. Quiere saber mas? SIN COSTO, responda SI o NO	Pendiente	2018-11-22	2018-11-22
2426363	11345621	AM	3104789098	2018-11-22 10:43:24	2018-11-22 10:43:28	Sea propietario! Sus cesantias en el FNA pueden ser la primera cuota de una casa. Quiere saber mas? SIN COSTO, responda SI o NO	Pendiente	2018-11-22	2018-11-22
2429570	72275295	AM	3013778747	2018-11-22 10:43:24	2018-11-22 10:43:28	CARLOS Sus cesantias en el FNA pueden ser la primera cuota de una casa para su familia. Quiere saber mas? SIN COSTO, responda SI o NO	Pendiente	2018-11-22	2018-11-22
2432084	43275868	AM	3113217763	2018-11-22 10:43:24	2018-11-22 10:43:28	SIGRID Sea propietario! Sus cesantias en el FNA pueden ser la primera cuota de una casa. Quiere saber mas? SIN COSTO, responda SI o NO	Pendiente	2018-11-22	2018-11-22
2436842	37007584	AM	3012861786	2018-11-22 10:43:24	2018-11-22 10:43:28	Sea propietario! Sus cesantias en el FNA pueden ser la primera cuota de una casa. Quiere saber mas? SIN COSTO, responda SI o NO	Pendiente	2018-11-22	2018-11-22
2444515	37443168	AM	3115309780	2018-11-22 10:43:24	2018-11-22 10:43:28	Sus cesantias en el FNA pueden ser la primera cuota de una casa para su familia. Quiere saber mas? SIN COSTO, responda SI o NO	Pendiente	2018-11-22	2018-11-22
2445877	15647346	AM	3008472368	2018-11-22 10:43:24	2018-11-22 10:43:28	Sus cesantias en el FNA pueden ser la primera cuota de una casa en CARTAGENA. Quiere saber mas? SIN COSTO, responda SI o NO	Pendiente	2018-11-22	2018-11-22
3535472	34057035	AM	3128330303	2018-11-22 10:43:24	2018-11-22 10:43:28	Sus cesantias en el FNA pueden ser la primera cuota de una casa para su familia. Quiere saber mas? SIN COSTO, responda SI o NO	Pendiente	2018-11-22	2018-11-22
3545134	32678428	AM	3017800989	2018-11-22 10:43:24	2018-11-22 10:43:28	Sus cesantias en el FNA pueden ser la primera cuota de una casa. Quiere saber mas? SIN COSTO, responda SI o NO	Pendiente	2018-11-22	2018-11-22
3563591	73102160	AM	3167420625	2018-11-22 10:43:24	2018-11-22 10:43:28	No deje pasar el tiempo. Sus cesantias en el FNA pueden ser la primera cuota de una casa. Quiere saber mas? SIN COSTO, responda SI o NO	Pendiente	2018-11-22	2018-11-22
3569171	36067908	AM	3138937720	2018-11-22 10:43:24	2018-11-22 10:43:28	Sea propietario! Sus cesantias en el FNA pueden ser la primera cuota de una casa. Quiere saber mas? SIN COSTO, responda SI o NO	Pendiente	2018-11-22	2018-11-22
3579236	71756021	AM	3003970221	2018-11-22 10:43:24	2018-11-22 10:43:28	RAMIRO Sus cesantias en el FNA pueden ser la primera cuota de una casa. En 2018 financiamos 9669 clientes como Ud. Quiere saber mas? SIN COSTO, responda SI o NO	Pendiente	2018-11-22	2018-11-22
3581050	33366508	AM	3118891866	2018-11-22 10:43:24	2018-11-22 10:43:28	Sus cesantias en el FNA pueden ser la primera cuota de una casa para su familia. Quiere saber mas? SIN COSTO, responda SI o NO	Pendiente	2018-11-22	2018-11-22
3583827	1121827571	AM	3208478441	2018-11-22 10:43:24	2018-11-22 10:43:28	Sus cesantias en el FNA pueden ser la primera cuota de una casa. En 2018 financiamos 9669 clientes como Ud. Quiere saber mas? SIN COSTO, responda SI o NO	Pendiente	2018-11-22	2018-11-22
3585126	12113204	AM	3176843311	2018-11-22 10:43:24	2018-11-22 10:43:28	Sus cesantias en el FNA pueden ser la primera cuota de una casa en NEIVA. Quiere saber mas? SIN COSTO, responda SI o NO	Pendiente	2018-11-22	2018-11-22
3586708	86040993	AM	3203480009	2018-11-22 10:43:24	2018-11-22 10:43:28	CARLOS Sus cesantias en el FNA pueden ser la primera cuota de una casa. En 2018 financiamos 9669 clientes como Ud. Quiere saber mas? SIN COSTO, responda SI o NO	Pendiente	2018-11-22	2018-11-22
3593217	7469044	AM	3182654564	2018-11-22 10:43:24	2018-11-22 10:43:28	No deje pasar el tiempo. Sus cesantias en el FNA pueden ser la primera cuota de una casa. Quiere saber mas? SIN COSTO, responda SI o NO	Pendiente	2018-11-22	2018-11-22
3598713	45450315	AM	3107054277	2018-11-22 10:43:24	2018-11-22 10:43:28	TERESA Sus cesantias en el FNA pueden ser la primera cuota de una casa. En 2018 financiamos 9669 clientes como Ud. Quiere saber mas? SIN COSTO, responda SI o NO	Pendiente	2018-11-22	2018-11-22
3599567	45539393	AM	3107224101	2018-11-22 10:43:24	2018-11-22 10:43:28	TANIA Sus cesantias en el FNA pueden ser la primera cuota de una casa para su familia. Quiere saber mas? SIN COSTO, responda SI o NO	Pendiente	2018-11-22	2018-11-22
3600835	32229797	AM	3113283191	2018-11-22 10:43:24	2018-11-22 10:43:28	No deje pasar el tiempo. Sus cesantias en el FNA pueden ser la primera cuota de una casa. Quiere saber mas? SIN COSTO, responda SI o NO	Pendiente	2018-11-22	2018-11-22
3609581	43909129	AM	3157778502	2018-11-22 10:43:24	2018-11-22 10:43:28	Sus cesantias en el FNA pueden ser la primera cuota de una casa en MEDELLIN. Quiere saber mas? SIN COSTO, responda SI o NO	Pendiente	2018-11-22	2018-11-22
3611913	43559179	AM	3103927545	2018-11-22 10:43:24	2018-11-22 10:43:28	Sus cesantias en el FNA pueden ser la primera cuota de una casa. Quiere saber mas? SIN COSTO, responda SI o NO	Pendiente	2018-11-22	2018-11-22
3612517	7720767	AM	3187954033	2018-11-22 10:43:24	2018-11-22 10:43:28	No deje pasar el tiempo. Sus cesantias en el FNA pueden ser la primera cuota de una casa. Quiere saber mas? SIN COSTO, responda SI o NO	Pendiente	2018-11-22	2018-11-22
3619781	45473677	AM	3114131138	2018-11-22 10:43:24	2018-11-22 10:43:28	TERESA No deje pasar el tiempo. Sus cesantias en el FNA pueden ser la primera cuota de una casa. Quiere saber mas? SIN COSTO, responda SI o NO	Pendiente	2018-11-22	2018-11-22
5396958	1090415505	AM	3168205021	2018-11-22 10:43:24	2018-11-22 10:43:28	Sus cesantias en el FNA pueden ser la primera cuota de una casa. Hay subsidios disponibles, preguntelos. Quiere saber mas? SIN COSTO, responda SI o NO	Pendiente	2018-11-22	2018-11-22
5402438	34319366	AM	3004912470	2018-11-22 10:43:24	2018-11-22 10:43:28	Sus cesantias en el FNA pueden ser la primera cuota de una casa. En 2018 financiamos 9669 clientes como Ud. Quiere saber mas? SIN COSTO, responda SI o NO	Pendiente	2018-11-22	2018-11-22
5416261	43463099	AM	3103761884	2018-11-22 10:43:24	2018-11-22 10:43:28	Sus cesantias en el FNA pueden ser la primera cuota de una casa. Quiere saber mas? SIN COSTO, responda SI o NO	Pendiente	2018-11-22	2018-11-22
5438835	51910898	AM	3212428692	2018-11-22 10:43:24	2018-11-22 10:44:05	ELIZABETH Sus cesantias en el FNA pueden ser la primera cuota de una casa. Hay subsidios disponibles, preguntelos. Quiere saber mas? SIN COSTO, responda SI o NO	SI	2018-11-22	2018-11-22	Muchas gracias por su respuesta. Un asesor del fondo Nacional del Ahorro se comunicara con usted.
5439707	31423489	AM	3117467489	2018-11-22 10:43:24	2018-11-22 12:06:55	PAULA Sea propietario! Sus cesantias en el FNA pueden ser la primera cuota de una casa. Quiere saber mas? SIN COSTO, responda SI o NO	SI	2018-11-22	2018-11-22	Muchas gracias por su respuesta. Un asesor del fondo Nacional del Ahorro se comunicara con usted.
5459067	98525561	AM	3105055067	2018-11-22 10:43:24	2018-11-22 10:43:28	Sus cesantias en el FNA pueden ser la primera cuota de una casa. En 2018 financiamos 9669 clientes como Ud. Quiere saber mas? SIN COSTO, responda SI o NO	Pendiente	2018-11-22	2018-11-22
5462476	71312896	AM	3014486148	2018-11-22 10:43:24	2018-11-22 10:43:28	Sus cesantias en el FNA pueden ser la primera cuota de una casa en MEDELLIN. Quiere saber mas? SIN COSTO, responda SI o NO	Pendiente	2018-11-22	2018-11-22
5468182	10242863	AM	3147898061	2018-11-22 10:43:24	2018-11-22 10:43:28	JOSE Sus cesantias en el FNA pueden ser la primera cuota de una casa para su familia. Quiere saber mas? SIN COSTO, responda SI o NO	Pendiente	2018-11-22	2018-11-22
5478583	36669725	AM	3008087437	2018-11-22 10:43:24	2018-11-22 10:43:28	Sus cesantias en el FNA pueden ser la primera cuota de una casa para su familia. Quiere saber mas? SIN COSTO, responda SI o NO	Pendiente	2018-11-22	2018-11-22
5491080	1140831972	AM	3007011596	2018-11-22 10:43:24	2018-11-22 10:43:28	CRISTINA Sus cesantias en el FNA pueden ser la primera cuota de una casa. En 2018 financiamos 9669 clientes como Ud. Quiere saber mas? SIN COSTO, responda SI o NO	Pendiente	2018-11-22	2018-11-22
5492282	16078611	AM	3017473133	2018-11-22 10:43:24	2018-11-22 10:43:28	ALEXANDER No deje pasar el tiempo. Sus cesantias en el FNA pueden ser la primera cuota de una casa. Quiere saber mas? SIN COSTO, responda SI o NO	Pendiente	2018-11-22	2018-11-22
5492768	42779624	AM	3117791987	2018-11-22 10:43:24	2018-11-22 10:43:28	Sea propietario! Sus cesantias en el FNA pueden ser la primera cuota de una casa. Quiere saber mas? SIN COSTO, responda SI o NO	Pendiente	2018-11-22	2018-11-22
5498608	1143327675	AM	3008059519	2018-11-22 10:43:24	2018-11-22 10:43:28	MARIA Sus cesantias en el FNA pueden ser la primera cuota de una casa para su familia. Quiere saber mas? SIN COSTO, responda SI o NO	Pendiente	2018-11-22	2018-11-22
10881228	53038852	AM	3043889381	2018-11-22 10:43:24	2018-11-22 10:43:28	DIANA Sus cesantias en el FNA pueden ser la primera cuota de una casa para su familia. Quiere saber mas? SIN COSTO, responda SI o NO	Pendiente	2018-11-22	2018-11-22
10920413	29665418	AM	3116364766	2018-11-22 10:43:24	2018-11-22 10:43:28	Sus cesantias en el FNA pueden ser la primera cuota de una casa. Hay subsidios disponibles, preguntelos. Quiere saber mas? SIN COSTO, responda SI o NO	Pendiente	2018-11-22	2018-11-22
10930286	3940232	AM	3233321881	2018-11-22 10:43:24	2018-11-22 16:48:00	Sus cesantias en el FNA pueden ser la primera cuota de una casa para su familia. Quiere saber mas? SIN COSTO, responda SI o NO	SI	2018-11-22	2018-11-22	Muchas gracias por su respuesta. Un asesor del fondo Nacional del Ahorro se comunicara con usted.
10935397	43876913	AM	3103599177	2018-11-22 10:43:24	2018-11-22 10:43:28	Sus cesantias en el FNA pueden ser la primera cuota de una casa. Quiere saber mas? SIN COSTO, responda SI o NO	Pendiente	2018-11-22	2018-11-22
10991841	91249061	AM	3186411316	2018-11-22 10:43:24	2018-11-22 14:02:17	Sus cesantias en el FNA pueden ser la primera cuota de una casa en BUCARAMANGA. Quiere saber mas? SIN COSTO, responda SI o NO	SI	2018-11-22	2018-11-22	Muchas gracias por su respuesta. Un asesor del fondo Nacional del Ahorro se comunicara con usted.
11025304	5993225	AM	3134814677	2018-11-22 10:43:24	2018-11-22 10:43:28	VICTOR Sus cesantias en el FNA pueden ser la primera cuota de una casa. En 2018 financiamos 9669 clientes como Ud. Quiere saber mas? SIN COSTO, responda SI o NO	Pendiente	2018-11-22	2018-11-22
11031470	73106086	AM	3157339543	2018-11-22 10:43:24	2018-11-22 10:44:57	Sea propietario! Sus cesantias en el FNA pueden ser la primera cuota de una casa. Quiere saber mas? SIN COSTO, responda SI o NO	SI	2018-11-22	2018-11-22	Muchas gracias por su respuesta. Un asesor del fondo Nacional del Ahorro se comunicara con usted.
11032639	65634510	AM	3102347668	2018-11-22 10:43:24	2018-11-22 10:43:28	Sus cesantias en el FNA pueden ser la primera cuota de una casa en NEIVA. Quiere saber mas? SIN COSTO, responda SI o NO	Pendiente	2018-11-22	2018-11-22
4815576	32841077	AM	3004809054	2018-11-22 10:43:24	2018-11-22 10:43:28	MARGARITA Sus cesantias en el FNA pueden ser la primera cuota de una casa en BARRANQUILLA. Quiere saber mas? SIN COSTO, responda SI o NO	Pendiente	2018-11-22	2018-11-22
4817247	16763653	AM	3182632406	2018-11-22 10:43:24	2018-11-22 10:43:28	Sus cesantias en el FNA pueden ser la primera cuota de una casa en CALI. Quiere saber mas? SIN COSTO, responda SI o NO	Pendiente	2018-11-22	2018-11-22
4820131	72219632	AM	3156237428	2018-11-22 10:43:24	2018-11-22 10:43:28	JOSE Sus cesantias en el FNA pueden ser la primera cuota de una casa en BARRANQUILLA. Quiere saber mas? SIN COSTO, responda SI o NO	Pendiente	2018-11-22	2018-11-22
4834654	75100719	AM	3113082019	2018-11-22 10:43:24	2018-11-22 10:43:28	LUIS Sea propietario! Sus cesantias en el FNA pueden ser la primera cuota de una casa. Quiere saber mas? SIN COSTO, responda SI o NO	Pendiente	2018-11-22	2018-11-22
4838159	46663976	AM	3153631563	2018-11-22 10:43:24	2018-11-22 10:43:28	JUDI Sus cesantias en el FNA pueden ser la primera cuota de una casa. En 2018 financiamos 9669 clientes como Ud. Quiere saber mas? SIN COSTO, responda SI o NO	Pendiente	2018-11-22	2018-11-22
4840992	1057579636	AM	3107749635	2018-11-22 10:43:24	2018-11-22 10:43:28	Sus cesantias en el FNA pueden ser la primera cuota de una casa para su familia. Quiere saber mas? SIN COSTO, responda SI o NO	Pendiente	2018-11-22	2018-11-22
4843718	9146080	AM	3002328804	2018-11-22 10:43:24	2018-11-22 10:43:28	DEIBIS Sus cesantias en el FNA pueden ser la primera cuota de una casa. Hay subsidios disponibles, preguntelos. Quiere saber mas? SIN COSTO, responda SI o NO	Pendiente	2018-11-22	2018-11-22
4851901	16936701	AM	3174133077	2018-11-22 10:43:24	2018-11-22 10:43:28	LUIS Sus cesantias en el FNA pueden ser la primera cuota de una casa para su familia. Quiere saber mas? SIN COSTO, responda SI o NO	Pendiente	2018-11-22	2018-11-22
4854037	1098664301	AM	3154839203	2018-11-22 10:43:24	2018-11-22 10:43:28	Sea propietario! Sus cesantias en el FNA pueden ser la primera cuota de una casa. Quiere saber mas? SIN COSTO, responda SI o NO	Pendiente	2018-11-22	2018-11-22
4854584	28542543	AM	3144117866	2018-11-22 10:43:24	2018-11-22 10:43:28	Sus cesantias en el FNA pueden ser la primera cuota de una casa. En 2018 financiamos 9669 clientes como Ud. Quiere saber mas? SIN COSTO, responda SI o NO	Pendiente	2018-11-22	2018-11-22
4856119	74083223	AM	3112688694	2018-11-22 10:43:24	2018-11-22 10:43:28	Sus cesantias en el FNA pueden ser la primera cuota de una casa. Hay subsidios disponibles, preguntelos. Quiere saber mas? SIN COSTO, responda SI o NO	Pendiente	2018-11-22	2018-11-22
4861228	78710085	AM	3126259236	2018-11-22 10:43:24	2018-11-22 10:43:28	Sus cesantias en el FNA pueden ser la primera cuota de una casa. En 2018 financiamos 9669 clientes como Ud. Quiere saber mas? SIN COSTO, responda SI o NO	Pendiente	2018-11-22	2018-11-22
4861767	28060920	AM	3014789242	2018-11-22 10:43:24	2018-11-22 10:43:28	DANNY Sea propietario! Sus cesantias en el FNA pueden ser la primera cuota de una casa. Quiere saber mas? SIN COSTO, responda SI o NO	Pendiente	2018-11-22	2018-11-22
4862733	72269118	AM	3133330441	2018-11-22 10:43:24	2018-11-22 10:43:28	HUMBERTO No deje pasar el tiempo. Sus cesantias en el FNA pueden ser la primera cuota de una casa. Quiere saber mas? SIN COSTO, responda SI o NO	Pendiente	2018-11-22	2018-11-22
4868062	31407286	AM	3103797829	2018-11-22 10:43:24	2018-11-22 10:43:28	BEATRIZ Sus cesantias en el FNA pueden ser la primera cuota de una casa. En 2018 financiamos 9669 clientes como Ud. Quiere saber mas? SIN COSTO, responda SI o NO	Pendiente	2018-11-22	2018-11-22
4868101	42688749	AM	3007767665	2018-11-22 10:43:24	2018-11-22 10:43:28	GLORIA Sus cesantias en el FNA pueden ser la primera cuota de una casa. En 2018 financiamos 9669 clientes como Ud. Quiere saber mas? SIN COSTO, responda SI o NO	Pendiente	2018-11-22	2018-11-22
4868117	78697148	AM	3178180899	2018-11-22 10:43:24	2018-11-22 10:43:28	JOHN Sea propietario! Sus cesantias en el FNA pueden ser la primera cuota de una casa. Quiere saber mas? SIN COSTO, responda SI o NO	Pendiente	2018-11-22	2018-11-22
4875285	75097598	AM	3113010190	2018-11-22 10:43:24	2018-11-22 11:58:21	LUCAS Sea propietario! Sus cesantias en el FNA pueden ser la primera cuota de una casa. Quiere saber mas? SIN COSTO, responda SI o NO	SI	2018-11-22	2018-11-22	Muchas gracias por su respuesta. Un asesor del fondo Nacional del Ahorro se comunicara con usted.
4884068	57294316	AM	3014271809	2018-11-22 10:43:24	2018-11-22 22:02:43	Sus cesantias en el FNA pueden ser la primera cuota de una casa. En 2018 financiamos 9669 clientes como Ud. Quiere saber mas? SIN COSTO, responda SI o NO	Pendiente	2018-11-22	2018-11-22	Muchas gracias por su respuesta. Un asesor del fondo Nacional del Ahorro se comunicara con usted.	SI
4891319	21203678	AM	3182009227	2018-11-22 10:43:24	2018-11-22 10:43:28	NUBIA Sea propietario! Sus cesantias en el FNA pueden ser la primera cuota de una casa. Quiere saber mas? SIN COSTO, responda SI o NO	Pendiente	2018-11-22	2018-11-22
4898484	98382653	AM	3127943638	2018-11-22 10:43:24	2018-11-22 10:43:28	JESUS Sus cesantias en el FNA pueden ser la primera cuota de una casa en PASTO. Quiere saber mas? SIN COSTO, responda SI o NO	Pendiente	2018-11-22	2018-11-22
4900931	72212070	AM	3057957571	2018-11-22 10:43:24	2018-11-22 10:43:28	ELKIN Sea propietario! Sus cesantias en el FNA pueden ser la primera cuota de una casa. Quiere saber mas? SIN COSTO, responda SI o NO	Pendiente	2018-11-22	2018-11-22
4904995	32552413	AM	3008152999	2018-11-22 10:43:24	2018-11-22 10:43:28	MARIA Sus cesantias en el FNA pueden ser la primera cuota de una casa en BARRANQUILLA. Quiere saber mas? SIN COSTO, responda SI o NO	Pendiente	2018-11-22	2018-11-22
4915305	72310292	AM	3107104971	2018-11-22 10:43:24	2018-11-22 10:43:28	Sus cesantias en el FNA pueden ser la primera cuota de una casa para su familia. Quiere saber mas? SIN COSTO, responda SI o NO	Pendiente	2018-11-22	2018-11-22
7480839	75106138	AM	3017333479	2018-11-22 10:43:24	2018-11-22 10:43:28	Sea propietario! Sus cesantias en el FNA pueden ser la primera cuota de una casa. Quiere saber mas? SIN COSTO, responda SI o NO	Pendiente	2018-11-22	2018-11-22
7485486	30686570	AM	3114021636	2018-11-22 10:43:24	2018-11-22 10:43:28	DIANA No deje pasar el tiempo. Sus cesantias en el FNA pueden ser la primera cuota de una casa. Quiere saber mas? SIN COSTO, responda SI o NO	Pendiente	2018-11-22	2018-11-22
7505868	1065596798	AM	3225304562	2018-11-22 10:43:24	2018-11-22 15:52:42	AIDEL Sus cesantias en el FNA pueden ser la primera cuota de una casa. Hay subsidios disponibles, preguntelos. Quiere saber mas? SIN COSTO, responda SI o NO	SI	2018-11-22	2018-11-22	Muchas gracias por su respuesta. Un asesor del fondo Nacional del Ahorro se comunicara con usted.
7510790	10279611	AM	3137371406	2018-11-22 10:43:24	2018-11-22 10:43:28	Sus cesantias en el FNA pueden ser la primera cuota de una casa para su familia. Quiere saber mas? SIN COSTO, responda SI o NO	Pendiente	2018-11-22	2018-11-22
7522578	31482322	AM	3176463332	2018-11-22 10:43:24	2018-11-22 10:43:28	DIANA Sus cesantias en el FNA pueden ser la primera cuota de una casa. Hay subsidios disponibles, preguntelos. Quiere saber mas? SIN COSTO, responda SI o NO	Pendiente	2018-11-22	2018-11-22
7538109	71695971	AM	3116118528	2018-11-22 10:43:24	2018-11-22 10:43:28	No deje pasar el tiempo. Sus cesantias en el FNA pueden ser la primera cuota de una casa. Quiere saber mas? SIN COSTO, responda SI o NO	Pendiente	2018-11-22	2018-11-22
7558333	24198488	AM	3135893411	2018-11-22 10:43:24	2018-11-22 10:43:28	Sus cesantias en el FNA pueden ser la primera cuota de una casa. Hay subsidios disponibles, preguntelos. Quiere saber mas? SIN COSTO, responda SI o NO	Pendiente	2018-11-22	2018-11-22
239592	4079334	AM	3112553836	2018-11-22 10:43:24	2018-11-22 10:43:28	ADAN Sus cesantias en el FNA pueden ser la primera cuota de una casa en DUITAMA. Quiere saber mas? SIN COSTO, responda SI o NO	Pendiente	2018-11-22	2018-11-22
352672	21238951	AM	3012181331	2018-11-22 10:43:24	2018-11-22 10:43:28	MARIA Sus cesantias en el FNA pueden ser la primera cuota de una casa. Hay subsidios disponibles, preguntelos. Quiere saber mas? SIN COSTO, responda SI o NO	Pendiente	2018-11-22	2018-11-22
360013	23020620	AM	3152355332	2018-11-22 10:43:24	2018-11-22 10:43:28	Sus cesantias en el FNA pueden ser la primera cuota de una casa en CARTAGENA. Quiere saber mas? SIN COSTO, responda SI o NO	Pendiente	2018-11-22	2018-11-22
363514	23853891	AM	3102773062	2018-11-22 10:43:24	2018-11-22 10:43:28	CLARA Sea propietario! Sus cesantias en el FNA pueden ser la primera cuota de una casa. Quiere saber mas? SIN COSTO, responda SI o NO	Pendiente	2018-11-22	2018-11-22
369836	25269966	AM	3174023834	2018-11-22 10:43:24	2018-11-22 10:43:28	Sus cesantias en el FNA pueden ser la primera cuota de una casa en POPAYAN. Quiere saber mas? SIN COSTO, responda SI o NO	Pendiente	2018-11-22	2018-11-22
370738	25452993	AM	3146480457	2018-11-22 10:43:24	2018-11-22 10:43:28	ADELA No deje pasar el tiempo. Sus cesantias en el FNA pueden ser la primera cuota de una casa. Quiere saber mas? SIN COSTO, responda SI o NO	Pendiente	2018-11-22	2018-11-22
376145	26536922	AM	3118257512	2018-11-22 10:43:24	2018-11-22 10:43:28	Sus cesantias en el FNA pueden ser la primera cuota de una casa. Hay subsidios disponibles, preguntelos. Quiere saber mas? SIN COSTO, responda SI o NO	Pendiente	2018-11-22	2018-11-22
381845	27395241	AM	3122718935	2018-11-22 10:43:24	2018-11-22 10:43:28	Sus cesantias en el FNA pueden ser la primera cuota de una casa. Hay subsidios disponibles, preguntelos. Quiere saber mas? SIN COSTO, responda SI o NO	Pendiente	2018-11-22	2018-11-22
392569	30282664	AM	3108328353	2018-11-22 10:43:24	2018-11-22 10:43:28	Sus cesantias en el FNA pueden ser la primera cuota de una casa. Quiere saber mas? SIN COSTO, responda SI o NO	Pendiente	2018-11-22	2018-11-22
393114	30331289	AM	3103217259	2018-11-22 10:43:24	2018-11-22 10:43:28	SANDRA Sus cesantias en el FNA pueden ser la primera cuota de una casa. Hay subsidios disponibles, preguntelos. Quiere saber mas? SIN COSTO, responda SI o NO	Pendiente	2018-11-22	2018-11-22
394108	30725595	AM	3006735626	2018-11-22 10:43:24	2018-11-22 10:43:28	MARIA Sus cesantias en el FNA pueden ser la primera cuota de una casa en PASTO. Quiere saber mas? SIN COSTO, responda SI o NO	Pendiente	2018-11-22	2018-11-22
397263	31833058	AM	3175625000	2018-11-22 10:43:24	2018-11-22 10:43:28	Sus cesantias en el FNA pueden ser la primera cuota de una casa. Quiere saber mas? SIN COSTO, responda SI o NO	Pendiente	2018-11-22	2018-11-22
1010281	71531378	AM	3014864284	2018-11-22 10:43:24	2018-11-22 11:12:43	HERNAN Sus cesantias en el FNA pueden ser la primera cuota de una casa. Hay subsidios disponibles, preguntelos. Quiere saber mas? SIN COSTO, responda SI o NO	SI	2018-11-22	2018-11-22	Muchas gracias por su respuesta. Un asesor del fondo Nacional del Ahorro se comunicara con usted.
1012522	25288935	AM	3136104104	2018-11-22 10:43:24	2018-11-22 10:43:28	LUZ Sus cesantias en el FNA pueden ser la primera cuota de una casa. Hay subsidios disponibles, preguntelos. Quiere saber mas? SIN COSTO, responda SI o NO	Pendiente	2018-11-22	2018-11-22
1015958	98392648	AM	3152745479	2018-11-22 10:43:24	2018-11-22 10:43:28	ANDRES Sus cesantias en el FNA pueden ser la primera cuota de una casa en PASTO. Quiere saber mas? SIN COSTO, responda SI o NO	Pendiente	2018-11-22	2018-11-22
1022283	30315331	AM	3168291128	2018-11-22 10:43:24	2018-11-22 10:50:36	No deje pasar el tiempo. Sus cesantias en el FNA pueden ser la primera cuota de una casa. Quiere saber mas? SIN COSTO, responda SI o NO	SI	2018-11-22	2018-11-22	Muchas gracias por su respuesta. Un asesor del fondo Nacional del Ahorro se comunicara con usted.
1026346	7180527	AM	3103288497	2018-11-22 10:43:24	2018-11-22 10:43:28	JHON Sus cesantias en el FNA pueden ser la primera cuota de una casa. Hay subsidios disponibles, preguntelos. Quiere saber mas? SIN COSTO, responda SI o NO	Pendiente	2018-11-22	2018-11-22
1030372	36304931	AM	3167512310	2018-11-22 10:43:24	2018-11-22 10:43:28	Sus cesantias en el FNA pueden ser la primera cuota de una casa en NEIVA. Quiere saber mas? SIN COSTO, responda SI o NO	Pendiente	2018-11-22	2018-11-22
1033075	98381704	AM	3103857236	2018-11-22 10:43:24	2018-11-22 10:43:28	Sus cesantias en el FNA pueden ser la primera cuota de una casa. Quiere saber mas? SIN COSTO, responda SI o NO	Pendiente	2018-11-22	2018-11-22
1033745	1085244902	AM	3007845233	2018-11-22 10:43:24	2018-11-22 10:43:28	Sea propietario! Sus cesantias en el FNA pueden ser la primera cuota de una casa. Quiere saber mas? SIN COSTO, responda SI o NO	Pendiente	2018-11-22	2018-11-22
1040233	43909246	AM	3113259104	2018-11-22 10:43:24	2018-11-22 10:43:28	MARLY No deje pasar el tiempo. Sus cesantias en el FNA pueden ser la primera cuota de una casa. Quiere saber mas? SIN COSTO, responda SI o NO	Pendiente	2018-11-22	2018-11-22
1043847	91277542	AM	3208515540	2018-11-22 10:43:24	2018-11-22 10:43:28	JOHN Sus cesantias en el FNA pueden ser la primera cuota de una casa en BUCARAMANGA. Quiere saber mas? SIN COSTO, responda SI o NO	Pendiente	2018-11-22	2018-11-22
1050342	13744489	AM	3163307085	2018-11-22 10:43:24	2018-11-22 10:43:28	JULIAN Sus cesantias en el FNA pueden ser la primera cuota de una casa para su familia. Quiere saber mas? SIN COSTO, responda SI o NO	Pendiente	2018-11-22	2018-11-22
4924527	79395091	AM	3207783682	2018-11-22 10:43:24	2018-11-22 10:43:28	EDGAR Sus cesantias en el FNA pueden ser la primera cuota de una casa. Hay subsidios disponibles, preguntelos. Quiere saber mas? SIN COSTO, responda SI o NO	Pendiente	2018-11-22	2018-11-22
4933139	43620669	AM	3162972003	2018-11-22 10:43:24	2018-11-22 11:07:44	SIRLEY Sus cesantias en el FNA pueden ser la primera cuota de una casa. En 2018 financiamos 9669 clientes como Ud. Quiere saber mas? SIN COSTO, responda SI o NO	SI	2018-11-22	2018-11-22	Muchas gracias por su respuesta. Un asesor del fondo Nacional del Ahorro se comunicara con usted.
4941779	1090368789	AM	3002368475	2018-11-22 10:43:24	2018-11-22 10:43:28	JOSE Sus cesantias en el FNA pueden ser la primera cuota de una casa. En 2018 financiamos 9669 clientes como Ud. Quiere saber mas? SIN COSTO, responda SI o NO	Pendiente	2018-11-22	2018-11-22
4942484	76323952	AM	3207973901	2018-11-22 10:43:24	2018-11-22 10:43:28	No deje pasar el tiempo. Sus cesantias en el FNA pueden ser la primera cuota de una casa. Quiere saber mas? SIN COSTO, responda SI o NO	Pendiente	2018-11-22	2018-11-22
4945415	1065595157	AM	3175636281	2018-11-22 10:43:24	2018-11-22 10:43:28	No deje pasar el tiempo. Sus cesantias en el FNA pueden ser la primera cuota de una casa. Quiere saber mas? SIN COSTO, responda SI o NO	Pendiente	2018-11-22	2018-11-22
4950632	66972099	AM	3153386219	2018-11-22 10:43:24	2018-11-22 10:43:28	Sus cesantias en el FNA pueden ser la primera cuota de una casa para su familia. Quiere saber mas? SIN COSTO, responda SI o NO	Pendiente	2018-11-22	2018-11-22
4951945	12754124	AM	3183193379	2018-11-22 10:43:24	2018-11-22 10:43:28	Sus cesantias en el FNA pueden ser la primera cuota de una casa en PASTO. Quiere saber mas? SIN COSTO, responda SI o NO	Pendiente	2018-11-22	2018-11-22
4956793	38284593	AM	3224507862	2018-11-22 10:43:24	2018-11-22 10:43:28	CLAUDIA Sus cesantias en el FNA pueden ser la primera cuota de una casa. Hay subsidios disponibles, preguntelos. Quiere saber mas? SIN COSTO, responda SI o NO	Pendiente	2018-11-22	2018-11-22
4957702	79389069	AM	3002007715	2018-11-22 10:43:24	2018-11-22 10:43:28	CARLOS Sus cesantias en el FNA pueden ser la primera cuota de una casa en IBAGUE. Quiere saber mas? SIN COSTO, responda SI o NO	Pendiente	2018-11-22	2018-11-22
4962323	43510342	AM	3104897760	2018-11-22 10:43:24	2018-11-22 10:43:28	Sea propietario! Sus cesantias en el FNA pueden ser la primera cuota de una casa. Quiere saber mas? SIN COSTO, responda SI o NO	Pendiente	2018-11-22	2018-11-22
4965069	32638791	AM	3163838468	2018-11-22 10:43:24	2018-11-22 10:43:28	IVON Sus cesantias en el FNA pueden ser la primera cuota de una casa en BARRANQUILLA. Quiere saber mas? SIN COSTO, responda SI o NO	Pendiente	2018-11-22	2018-11-22
4968388	79781412	AM	3117648709	2018-11-22 10:43:24	2018-11-22 10:43:28	Sus cesantias en el FNA pueden ser la primera cuota de una casa. En 2018 financiamos 9669 clientes como Ud. Quiere saber mas? SIN COSTO, responda SI o NO	Pendiente	2018-11-22	2018-11-22
4974233	30305550	AM	3117050075	2018-11-22 10:43:24	2018-11-22 10:43:28	LILIANA Sus cesantias en el FNA pueden ser la primera cuota de una casa para su familia. Quiere saber mas? SIN COSTO, responda SI o NO	Pendiente	2018-11-22	2018-11-22
4975980	1118555780	AM	3108125844	2018-11-22 10:43:24	2018-11-22 10:43:28	Sus cesantias en el FNA pueden ser la primera cuota de una casa para su familia. Quiere saber mas? SIN COSTO, responda SI o NO	Pendiente	2018-11-22	2018-11-22
4977319	70079017	AM	3006773272	2018-11-22 10:43:24	2018-11-22 12:35:53	FRANCISCO Sus cesantias en el FNA pueden ser la primera cuota de una casa para su familia. Quiere saber mas? SIN COSTO, responda SI o NO	SI	2018-11-22	2018-11-22	Muchas gracias por su respuesta. Un asesor del fondo Nacional del Ahorro se comunicara con usted.
4977334	16687946	AM	3185223576	2018-11-22 10:43:24	2018-11-22 10:43:28	Sus cesantias en el FNA pueden ser la primera cuota de una casa en CALI. Quiere saber mas? SIN COSTO, responda SI o NO	Pendiente	2018-11-22	2018-11-22
4978773	1098632378	AM	3102490444	2018-11-22 10:43:24	2018-11-22 10:43:28	Sus cesantias en el FNA pueden ser la primera cuota de una casa. Hay subsidios disponibles, preguntelos. Quiere saber mas? SIN COSTO, responda SI o NO	Pendiente	2018-11-22	2018-11-22
4981698	40366365	AM	3114565177	2018-11-22 10:43:24	2018-11-22 10:43:28	EVANGELINA Sea propietario! Sus cesantias en el FNA pueden ser la primera cuota de una casa. Quiere saber mas? SIN COSTO, responda SI o NO	Pendiente	2018-11-22	2018-11-22
4987974	12229881	AM	3112809890	2018-11-22 10:43:24	2018-11-22 10:43:28	Sus cesantias en el FNA pueden ser la primera cuota de una casa. Quiere saber mas? SIN COSTO, responda SI o NO	Pendiente	2018-11-22	2018-11-22
4995967	31953766	AM	3164461063	2018-11-22 10:43:24	2018-11-22 10:43:28	Sus cesantias en el FNA pueden ser la primera cuota de una casa para su familia. Quiere saber mas? SIN COSTO, responda SI o NO	Pendiente	2018-11-22	2018-11-22
5004492	30395878	AM	3103586313	2018-11-22 10:43:24	2018-11-22 10:43:28	LAURA Sus cesantias en el FNA pueden ser la primera cuota de una casa. Hay subsidios disponibles, preguntelos. Quiere saber mas? SIN COSTO, responda SI o NO	Pendiente	2018-11-22	2018-11-22
5005691	28994672	AM	3125137258	2018-11-22 10:43:24	2018-11-22 10:43:28	MORELY Sus cesantias en el FNA pueden ser la primera cuota de una casa. Hay subsidios disponibles, preguntelos. Quiere saber mas? SIN COSTO, responda SI o NO	Pendiente	2018-11-22	2018-11-22
5013176	63525633	AM	3017056844	2018-11-22 10:43:24	2018-11-22 10:43:28	Sea propietario! Sus cesantias en el FNA pueden ser la primera cuota de una casa. Quiere saber mas? SIN COSTO, responda SI o NO	Pendiente	2018-11-22	2018-11-22
5022491	1053766790	AM	3112147437	2018-11-22 10:43:24	2018-11-22 10:43:28	Sea propietario! Sus cesantias en el FNA pueden ser la primera cuota de una casa. Quiere saber mas? SIN COSTO, responda SI o NO	Pendiente	2018-11-22	2018-11-22
5032365	7475660	AM	3107356905	2018-11-22 10:43:24	2018-11-22 10:43:28	ARMANDO Sea propietario! Sus cesantias en el FNA pueden ser la primera cuota de una casa. Quiere saber mas? SIN COSTO, responda SI o NO	Pendiente	2018-11-22	2018-11-22
6577353	43732349	AM	3112750479	2018-11-22 10:43:24	2018-11-22 10:43:28	MARIA Sus cesantias en el FNA pueden ser la primera cuota de una casa. En 2018 financiamos 9669 clientes como Ud. Quiere saber mas? SIN COSTO, responda SI o NO	Pendiente	2018-11-22	2018-11-22
6577915	9868176	AM	3116335750	2018-11-22 10:43:24	2018-11-22 10:43:28	Sus cesantias en el FNA pueden ser la primera cuota de una casa en CALI. Quiere saber mas? SIN COSTO, responda SI o NO	Pendiente	2018-11-22	2018-11-22
6579395	31286477	AM	3155976418	2018-11-22 10:43:24	2018-11-22 10:43:28	Sea propietario! Sus cesantias en el FNA pueden ser la primera cuota de una casa. Quiere saber mas? SIN COSTO, responda SI o NO	Pendiente	2018-11-22	2018-11-22
6584955	42935542	AM	3113469058	2018-11-22 10:43:24	2018-11-22 10:43:28	ESTELLA Sus cesantias en el FNA pueden ser la primera cuota de una casa. Hay subsidios disponibles, preguntelos. Quiere saber mas? SIN COSTO, responda SI o NO	Pendiente	2018-11-22	2018-11-22
6599840	42798316	AM	3182939026	2018-11-22 10:43:24	2018-11-22 10:43:28	MONICA No deje pasar el tiempo. Sus cesantias en el FNA pueden ser la primera cuota de una casa. Quiere saber mas? SIN COSTO, responda SI o NO	Pendiente	2018-11-22	2018-11-22
6606008	54253717	AM	3147875287	2018-11-22 10:43:24	2018-11-22 10:43:28	MERLYN No deje pasar el tiempo. Sus cesantias en el FNA pueden ser la primera cuota de una casa. Quiere saber mas? SIN COSTO, responda SI o NO	Pendiente	2018-11-22	2018-11-22
6641660	16739029	AM	3165244665	2018-11-22 10:43:24	2018-11-22 10:59:42	Sus cesantias en el FNA pueden ser la primera cuota de una casa en CALI. Quiere saber mas? SIN COSTO, responda SI o NO	SI	2018-11-22	2018-11-22	Muchas gracias por su respuesta. Un asesor del fondo Nacional del Ahorro se comunicara con usted.
1908971	88269436	AM	3104196481	2018-11-22 10:43:24	2018-11-22 10:43:28	Sea propietario! Sus cesantias en el FNA pueden ser la primera cuota de una casa. Quiere saber mas? SIN COSTO, responda SI o NO	Pendiente	2018-11-22	2018-11-22
1922783	52777150	AM	3212507164	2018-11-22 10:43:24	2018-11-22 10:43:28	Sea propietario! Sus cesantias en el FNA pueden ser la primera cuota de una casa. Quiere saber mas? SIN COSTO, responda SI o NO	Pendiente	2018-11-22	2018-11-22
1925293	45480633	AM	3012302066	2018-11-22 10:43:24	2018-11-22 10:43:28	Sus cesantias en el FNA pueden ser la primera cuota de una casa para su familia. Quiere saber mas? SIN COSTO, responda SI o NO	Pendiente	2018-11-22	2018-11-22
1927902	64568703	AM	3136159674	2018-11-22 10:43:24	2018-11-22 10:43:28	KATTYA Sus cesantias en el FNA pueden ser la primera cuota de una casa para su familia. Quiere saber mas? SIN COSTO, responda SI o NO	Pendiente	2018-11-22	2018-11-22
1942228	52900336	AM	3152434824	2018-11-22 10:43:24	2018-11-22 10:43:28	Sus cesantias en el FNA pueden ser la primera cuota de una casa. En 2018 financiamos 9669 clientes como Ud. Quiere saber mas? SIN COSTO, responda SI o NO	Pendiente	2018-11-22	2018-11-22
1972503	13748120	AM	3183648263	2018-11-22 10:43:24	2018-11-22 10:43:28	Sus cesantias en el FNA pueden ser la primera cuota de una casa. Quiere saber mas? SIN COSTO, responda SI o NO	Pendiente	2018-11-22	2018-11-22
1975762	24333576	AM	3116227043	2018-11-22 10:43:24	2018-11-22 10:43:28	Sus cesantias en el FNA pueden ser la primera cuota de una casa. Hay subsidios disponibles, preguntelos. Quiere saber mas? SIN COSTO, responda SI o NO	Pendiente	2018-11-22	2018-11-22
1981159	7713522	AM	3102194165	2018-11-22 10:43:24	2018-11-22 10:43:28	JOSE Sus cesantias en el FNA pueden ser la primera cuota de una casa en NEIVA. Quiere saber mas? SIN COSTO, responda SI o NO	Pendiente	2018-11-22	2018-11-22
3334771	1129578704	AM	3138004320	2018-11-22 10:43:24	2018-11-22 10:43:28	Sus cesantias en el FNA pueden ser la primera cuota de una casa en BARRANQUILLA. Quiere saber mas? SIN COSTO, responda SI o NO	Pendiente	2018-11-22	2018-11-22
3335379	66810901	AM	3007827631	2018-11-22 10:43:24	2018-11-22 11:40:30	Sus cesantias en el FNA pueden ser la primera cuota de una casa. Hay subsidios disponibles, preguntelos. Quiere saber mas? SIN COSTO, responda SI o NO	SI	2018-11-22	2018-11-22	Muchas gracias por su respuesta. Un asesor del fondo Nacional del Ahorro se comunicara con usted.
3337126	91480909	AM	3158473422	2018-11-22 10:43:24	2018-11-22 10:43:28	RAFAEL Sus cesantias en el FNA pueden ser la primera cuota de una casa. Hay subsidios disponibles, preguntelos. Quiere saber mas? SIN COSTO, responda SI o NO	Pendiente	2018-11-22	2018-11-22
3338922	94526375	AM	3207575255	2018-11-22 10:43:24	2018-11-22 10:43:28	Sus cesantias en el FNA pueden ser la primera cuota de una casa. En 2018 financiamos 9669 clientes como Ud. Quiere saber mas? SIN COSTO, responda SI o NO	Pendiente	2018-11-22	2018-11-22
3345149	7172983	AM	3204957329	2018-11-22 10:43:24	2018-11-22 10:43:28	CARLOS Sus cesantias en el FNA pueden ser la primera cuota de una casa para su familia. Quiere saber mas? SIN COSTO, responda SI o NO	Pendiente	2018-11-22	2018-11-22
3345504	32759961	AM	3015011461	2018-11-22 10:43:24	2018-11-22 10:43:28	Sus cesantias en el FNA pueden ser la primera cuota de una casa. Quiere saber mas? SIN COSTO, responda SI o NO	Pendiente	2018-11-22	2018-11-22
3348698	40331671	AM	3112075196	2018-11-22 10:43:24	2018-11-22 10:43:28	Sus cesantias en el FNA pueden ser la primera cuota de una casa en VILLAVICENCIO. Quiere saber mas? SIN COSTO, responda SI o NO	Pendiente	2018-11-22	2018-11-22
3356293	1047394639	AM	3004939162	2018-11-22 10:43:24	2018-11-22 10:43:28	ALEXANDRA Sus cesantias en el FNA pueden ser la primera cuota de una casa para su familia. Quiere saber mas? SIN COSTO, responda SI o NO	Pendiente	2018-11-22	2018-11-22
3361238	73162541	AM	3135349755	2018-11-22 10:43:24	2018-11-22 10:43:28	Sus cesantias en el FNA pueden ser la primera cuota de una casa. Hay subsidios disponibles, preguntelos. Quiere saber mas? SIN COSTO, responda SI o NO	Pendiente	2018-11-22	2018-11-22
3367120	52710454	AM	3006523549	2018-11-22 10:43:24	2018-11-22 10:43:28	ANA Sus cesantias en el FNA pueden ser la primera cuota de una casa para su familia. Quiere saber mas? SIN COSTO, responda SI o NO	Pendiente	2018-11-22	2018-11-22
3369381	74376266	AM	3115036089	2018-11-22 10:43:24	2018-11-22 10:43:28	No deje pasar el tiempo. Sus cesantias en el FNA pueden ser la primera cuota de una casa. Quiere saber mas? SIN COSTO, responda SI o NO	Pendiente	2018-11-22	2018-11-22
3374289	63316097	AM	3175455805	2018-11-22 10:43:24	2018-11-22 10:43:28	Sus cesantias en el FNA pueden ser la primera cuota de una casa. En 2018 financiamos 9669 clientes como Ud. Quiere saber mas? SIN COSTO, responda SI o NO	Pendiente	2018-11-22	2018-11-22
3375183	88247974	AM	3118829684	2018-11-22 10:43:24	2018-11-22 10:43:28	EDUARD No deje pasar el tiempo. Sus cesantias en el FNA pueden ser la primera cuota de una casa. Quiere saber mas? SIN COSTO, responda SI o NO	Pendiente	2018-11-22	2018-11-22
3378255	85475596	AM	3135758513	2018-11-22 10:43:24	2018-11-22 11:29:28	MANUEL Sus cesantias en el FNA pueden ser la primera cuota de una casa en SANTA MARTA. Quiere saber mas? SIN COSTO, responda SI o NO	SI	2018-11-22	2018-11-22	Muchas gracias por su respuesta. Un asesor del fondo Nacional del Ahorro se comunicara con usted.
3382207	46453538	AM	3102268801	2018-11-22 10:43:24	2018-11-22 10:43:28	Sus cesantias en el FNA pueden ser la primera cuota de una casa. Quiere saber mas? SIN COSTO, responda SI o NO	Pendiente	2018-11-22	2018-11-22
3388468	9093158	AM	3126480731	2018-11-22 10:43:24	2018-11-22 10:43:28	Sus cesantias en el FNA pueden ser la primera cuota de una casa. En 2018 financiamos 9669 clientes como Ud. Quiere saber mas? SIN COSTO, responda SI o NO	Pendiente	2018-11-22	2018-11-22
3394153	31529816	AM	3146307413	2018-11-22 10:43:24	2018-11-22 10:43:28	FRANCIA No deje pasar el tiempo. Sus cesantias en el FNA pueden ser la primera cuota de una casa. Quiere saber mas? SIN COSTO, responda SI o NO	Pendiente	2018-11-22	2018-11-22
3402655	8725256	AM	3107003082	2018-11-22 10:43:24	2018-11-22 12:45:24	JOSE Sus cesantias en el FNA pueden ser la primera cuota de una casa. Hay subsidios disponibles, preguntelos. Quiere saber mas? SIN COSTO, responda SI o NO	SI	2018-11-22	2018-11-22	Muchas gracias por su respuesta. Un asesor del fondo Nacional del Ahorro se comunicara con usted.
3402938	35260316	AM	3214910787	2018-11-22 10:43:24	2018-11-22 10:43:28	Sus cesantias en el FNA pueden ser la primera cuota de una casa en VILLAVICENCIO. Quiere saber mas? SIN COSTO, responda SI o NO	Pendiente	2018-11-22	2018-11-22
3406394	1075234422	AM	3188711650	2018-11-22 10:43:24	2018-11-22 10:43:31	Sus cesantias en el FNA pueden ser la primera cuota de una casa en NEIVA. Quiere saber mas? SIN COSTO, responda SI o NO	Pendiente	2018-11-22	2018-11-22
3408201	86057380	AM	3208023443	2018-11-22 10:43:24	2018-11-22 10:43:28	JULIO Sus cesantias en el FNA pueden ser la primera cuota de una casa en VILLAVICENCIO. Quiere saber mas? SIN COSTO, responda SI o NO	Pendiente	2018-11-22	2018-11-22
3417651	80102784	AM	3003300183	2018-11-22 10:43:24	2018-11-22 10:43:28	No deje pasar el tiempo. Sus cesantias en el FNA pueden ser la primera cuota de una casa. Quiere saber mas? SIN COSTO, responda SI o NO	Pendiente	2018-11-22	2018-11-22
3421943	88147752	AM	3006009074	2018-11-22 10:43:24	2018-11-22 10:43:28	Sus cesantias en el FNA pueden ser la primera cuota de una casa. Hay subsidios disponibles, preguntelos. Quiere saber mas? SIN COSTO, responda SI o NO	Pendiente	2018-11-22	2018-11-22
3424202	1045677630	AM	3004050300	2018-11-22 10:43:24	2018-11-22 10:43:28	DIANA Sea propietario! Sus cesantias en el FNA pueden ser la primera cuota de una casa. Quiere saber mas? SIN COSTO, responda SI o NO	Pendiente	2018-11-22	2018-11-22
3425321	94414561	AM	3174232678	2018-11-22 10:43:24	2018-11-22 10:43:28	Sus cesantias en el FNA pueden ser la primera cuota de una casa. Quiere saber mas? SIN COSTO, responda SI o NO	Pendiente	2018-11-22	2018-11-22
3427647	43454972	AM	3207760224	2018-11-22 10:43:24	2018-11-22 10:43:28	Sus cesantias en el FNA pueden ser la primera cuota de una casa en MEDELLIN. Quiere saber mas? SIN COSTO, responda SI o NO	Pendiente	2018-11-22	2018-11-22
5038524	71717182	AM	3006527384	2018-11-22 10:43:24	2018-11-22 10:43:28	Sus cesantias en el FNA pueden ser la primera cuota de una casa. Quiere saber mas? SIN COSTO, responda SI o NO	Pendiente	2018-11-22	2018-11-22
5038548	16717088	AM	3217533178	2018-11-22 10:43:24	2018-11-22 10:43:31	JAIRO Sus cesantias en el FNA pueden ser la primera cuota de una casa para su familia. Quiere saber mas? SIN COSTO, responda SI o NO	Pendiente	2018-11-22	2018-11-22
5038554	93363306	AM	3004699438	2018-11-22 10:43:24	2018-11-22 10:43:28	Sus cesantias en el FNA pueden ser la primera cuota de una casa. En 2018 financiamos 9669 clientes como Ud. Quiere saber mas? SIN COSTO, responda SI o NO	Pendiente	2018-11-22	2018-11-22
5038561	93060175	AM	3103789059	2018-11-22 10:43:24	2018-11-22 10:43:28	Sus cesantias en el FNA pueden ser la primera cuota de una casa para su familia. Quiere saber mas? SIN COSTO, responda SI o NO	Pendiente	2018-11-22	2018-11-22
5038581	70112168	AM	3016386794	2018-11-22 10:43:24	2018-11-22 11:29:22	NESTOR Sea propietario! Sus cesantias en el FNA pueden ser la primera cuota de una casa. Quiere saber mas? SIN COSTO, responda SI o NO	SI	2018-11-22	2018-11-22	Muchas gracias por su respuesta. Un asesor del fondo Nacional del Ahorro se comunicara con usted.
5041346	1050952959	AM	3102282074	2018-11-22 10:43:24	2018-11-22 10:43:28	AILEN Sus cesantias en el FNA pueden ser la primera cuota de una casa. Hay subsidios disponibles, preguntelos. Quiere saber mas? SIN COSTO, responda SI o NO	Pendiente	2018-11-22	2018-11-22
5044522	91478039	AM	3174279571	2018-11-22 10:43:24	2018-11-22 10:43:28	Sus cesantias en el FNA pueden ser la primera cuota de una casa. Hay subsidios disponibles, preguntelos. Quiere saber mas? SIN COSTO, responda SI o NO	Pendiente	2018-11-22	2018-11-22
5046724	10267264	AM	3137459283	2018-11-22 10:43:24	2018-11-22 10:43:28	Sus cesantias en el FNA pueden ser la primera cuota de una casa. En 2018 financiamos 9669 clientes como Ud. Quiere saber mas? SIN COSTO, responda SI o NO	Pendiente	2018-11-22	2018-11-22
5047486	1143930862	AM	3005327193	2018-11-22 10:43:24	2018-11-22 10:43:28	Sus cesantias en el FNA pueden ser la primera cuota de una casa. Hay subsidios disponibles, preguntelos. Quiere saber mas? SIN COSTO, responda SI o NO	Pendiente	2018-11-22	2018-11-22
5051519	25292093	AM	3183660119	2018-11-22 10:43:24	2018-11-22 10:43:28	SANDRA Sus cesantias en el FNA pueden ser la primera cuota de una casa para su familia. Quiere saber mas? SIN COSTO, responda SI o NO	Pendiente	2018-11-22	2018-11-22
5059341	77013422	AM	3008014464	2018-11-22 10:43:24	2018-11-22 10:43:28	Sus cesantias en el FNA pueden ser la primera cuota de una casa. Hay subsidios disponibles, preguntelos. Quiere saber mas? SIN COSTO, responda SI o NO	Pendiente	2018-11-22	2018-11-22
5060621	16772180	AM	3117862723	2018-11-22 10:43:24	2018-11-22 10:43:31	Sus cesantias en el FNA pueden ser la primera cuota de una casa. Quiere saber mas? SIN COSTO, responda SI o NO	Pendiente	2018-11-22	2018-11-22
5061703	94274964	AM	3113695318	2018-11-22 10:43:24	2018-11-22 10:43:28	JUAN Sus cesantias en el FNA pueden ser la primera cuota de una casa para su familia. Quiere saber mas? SIN COSTO, responda SI o NO	Pendiente	2018-11-22	2018-11-22
5069653	43035272	AM	3015489076	2018-11-22 10:43:24	2018-11-22 10:43:28	GLORIA Sus cesantias en el FNA pueden ser la primera cuota de una casa. Hay subsidios disponibles, preguntelos. Quiere saber mas? SIN COSTO, responda SI o NO	Pendiente	2018-11-22	2018-11-22
5069672	7222407	AM	3204296749	2018-11-22 10:43:24	2018-11-22 10:43:28	Sus cesantias en el FNA pueden ser la primera cuota de una casa para su familia. Quiere saber mas? SIN COSTO, responda SI o NO	Pendiente	2018-11-22	2018-11-22
5076293	1130608889	AM	3148623171	2018-11-22 10:43:24	2018-11-22 10:43:28	Sus cesantias en el FNA pueden ser la primera cuota de una casa. En 2018 financiamos 9669 clientes como Ud. Quiere saber mas? SIN COSTO, responda SI o NO	Pendiente	2018-11-22	2018-11-22
5080192	45476162	AM	3165265232	2018-11-22 10:43:24	2018-11-22 10:43:28	Sus cesantias en el FNA pueden ser la primera cuota de una casa para su familia. Quiere saber mas? SIN COSTO, responda SI o NO	Pendiente	2018-11-22	2018-11-22
5080492	65780148	AM	3107895837	2018-11-22 10:43:24	2018-11-22 10:43:28	ALEXANDRA Sus cesantias en el FNA pueden ser la primera cuota de una casa para su familia. Quiere saber mas? SIN COSTO, responda SI o NO	Pendiente	2018-11-22	2018-11-22
5081718	10257053	AM	3113837812	2018-11-22 10:43:24	2018-11-22 10:43:28	CARLOS No deje pasar el tiempo. Sus cesantias en el FNA pueden ser la primera cuota de una casa. Quiere saber mas? SIN COSTO, responda SI o NO	Pendiente	2018-11-22	2018-11-22
5082990	1065578532	AM	3004752550	2018-11-22 10:43:24	2018-11-22 10:43:28	Sus cesantias en el FNA pueden ser la primera cuota de una casa en VALLEDUPAR. Quiere saber mas? SIN COSTO, responda SI o NO	Pendiente	2018-11-22	2018-11-22
5084649	30307127	AM	3127052907	2018-11-22 10:43:24	2018-11-22 10:43:28	LUZ Sus cesantias en el FNA pueden ser la primera cuota de una casa en MANIZALES. Quiere saber mas? SIN COSTO, responda SI o NO	Pendiente	2018-11-22	2018-11-22
5086492	32184539	AM	3005034849	2018-11-22 10:43:24	2018-11-22 10:43:31	Sus cesantias en el FNA pueden ser la primera cuota de una casa para su familia. Quiere saber mas? SIN COSTO, responda SI o NO	Pendiente	2018-11-22	2018-11-22
5086709	63466256	AM	3165296413	2018-11-22 10:43:24	2018-11-22 10:43:28	No deje pasar el tiempo. Sus cesantias en el FNA pueden ser la primera cuota de una casa. Quiere saber mas? SIN COSTO, responda SI o NO	Pendiente	2018-11-22	2018-11-22
5091727	33066816	AM	3013452007	2018-11-22 10:43:24	2018-11-22 10:43:28	Sus cesantias en el FNA pueden ser la primera cuota de una casa en CARTAGENA. Quiere saber mas? SIN COSTO, responda SI o NO	Pendiente	2018-11-22	2018-11-22
5091764	41888797	AM	3005193021	2018-11-22 10:43:24	2018-11-22 10:43:28	GLORIA Sus cesantias en el FNA pueden ser la primera cuota de una casa en MEDELLIN. Quiere saber mas? SIN COSTO, responda SI o NO	Pendiente	2018-11-22	2018-11-22
5097605	71712219	AM	3113193272	2018-11-22 10:43:24	2018-11-22 10:43:28	Sus cesantias en el FNA pueden ser la primera cuota de una casa en MEDELLIN. Quiere saber mas? SIN COSTO, responda SI o NO	Pendiente	2018-11-22	2018-11-22
5099967	65783696	AM	3005695222	2018-11-22 10:43:24	2018-11-22 10:43:28	ALEXANDRA Sus cesantias en el FNA pueden ser la primera cuota de una casa. En 2018 financiamos 9669 clientes como Ud. Quiere saber mas? SIN COSTO, responda SI o NO	Pendiente	2018-11-22	2018-11-22
5102787	94370105	AM	3216253909	2018-11-22 10:43:24	2018-11-22 10:43:28	No deje pasar el tiempo. Sus cesantias en el FNA pueden ser la primera cuota de una casa. Quiere saber mas? SIN COSTO, responda SI o NO	Pendiente	2018-11-22	2018-11-22
5108531	34565632	AM	3127354435	2018-11-22 10:43:24	2018-11-22 10:43:28	Sus cesantias en el FNA pueden ser la primera cuota de una casa. En 2018 financiamos 9669 clientes como Ud. Quiere saber mas? SIN COSTO, responda SI o NO	Pendiente	2018-11-22	2018-11-22
5117108	45521658	AM	3106021160	2018-11-22 10:43:24	2018-11-22 11:06:52	Sea propietario! Sus cesantias en el FNA pueden ser la primera cuota de una casa. Quiere saber mas? SIN COSTO, responda SI o NO	SI	2018-11-22	2018-11-22	Muchas gracias por su respuesta. Un asesor del fondo Nacional del Ahorro se comunicara con usted.
5121393	72286965	AM	3208509185	2018-11-22 10:43:24	2018-11-22 10:43:28	HAROLD No deje pasar el tiempo. Sus cesantias en el FNA pueden ser la primera cuota de una casa. Quiere saber mas? SIN COSTO, responda SI o NO	Pendiente	2018-11-22	2018-11-22
5129403	15209393	AM	3008460055	2018-11-22 10:43:24	2018-11-22 10:43:28	Sus cesantias en el FNA pueden ser la primera cuota de una casa para su familia. Quiere saber mas? SIN COSTO, responda SI o NO	Pendiente	2018-11-22	2018-11-22
5131192	80099072	AM	3118359113	2018-11-22 10:43:24	2018-11-22 10:43:28	Sus cesantias en el FNA pueden ser la primera cuota de una casa en IBAGUE. Quiere saber mas? SIN COSTO, responda SI o NO	Pendiente	2018-11-22	2018-11-22
5133168	52781430	AM	3006643869	2018-11-22 10:43:24	2018-11-22 10:43:28	JEIMMY Sea propietario! Sus cesantias en el FNA pueden ser la primera cuota de una casa. Quiere saber mas? SIN COSTO, responda SI o NO	Pendiente	2018-11-22	2018-11-22
5135611	1094879655	AM	3008512802	2018-11-22 10:43:24	2018-11-22 10:43:28	Sus cesantias en el FNA pueden ser la primera cuota de una casa para su familia. Quiere saber mas? SIN COSTO, responda SI o NO	Pendiente	2018-11-22	2018-11-22
6245622	1110462373	AM	3166878911	2018-11-22 10:43:24	2018-11-22 10:43:28	DAVID Sus cesantias en el FNA pueden ser la primera cuota de una casa en IBAGUE. Quiere saber mas? SIN COSTO, responda SI o NO	Pendiente	2018-11-22	2018-11-22
6277082	22521622	AM	3005022981	2018-11-22 10:43:24	2018-11-22 10:43:28	Sus cesantias en el FNA pueden ser la primera cuota de una casa para su familia. Quiere saber mas? SIN COSTO, responda SI o NO	Pendiente	2018-11-22	2018-11-22
6284084	1045668353	AM	3016280397	2018-11-22 10:43:24	2018-11-22 10:43:28	Sus cesantias en el FNA pueden ser la primera cuota de una casa. Hay subsidios disponibles, preguntelos. Quiere saber mas? SIN COSTO, responda SI o NO	Pendiente	2018-11-22	2018-11-22
6290879	66722289	AM	3046549004	2018-11-22 10:43:24	2018-11-22 10:43:28	Sea propietario! Sus cesantias en el FNA pueden ser la primera cuota de una casa. Quiere saber mas? SIN COSTO, responda SI o NO	Pendiente	2018-11-22	2018-11-22
6290957	31219997	AM	3108296357	2018-11-22 10:43:24	2018-11-22 10:43:28	GUILLERMINA Sus cesantias en el FNA pueden ser la primera cuota de una casa. En 2018 financiamos 9669 clientes como Ud. Quiere saber mas? SIN COSTO, responda SI o NO	Pendiente	2018-11-22	2018-11-22
6293462	14606590	AM	3117251531	2018-11-22 10:43:24	2018-11-22 10:43:28	MILTON Sea propietario! Sus cesantias en el FNA pueden ser la primera cuota de una casa. Quiere saber mas? SIN COSTO, responda SI o NO	Pendiente	2018-11-22	2018-11-22
6303556	16540942	AM	3136637707	2018-11-22 10:43:24	2018-11-22 10:43:28	Sus cesantias en el FNA pueden ser la primera cuota de una casa. Quiere saber mas? SIN COSTO, responda SI o NO	Pendiente	2018-11-22	2018-11-22
6306888	10279456	AM	3208301589	2018-11-22 10:43:24	2018-11-22 10:44:53	LUIS Sus cesantias en el FNA pueden ser la primera cuota de una casa para su familia. Quiere saber mas? SIN COSTO, responda SI o NO	SI	2018-11-22	2018-11-22	Muchas gracias por su respuesta. Un asesor del fondo Nacional del Ahorro se comunicara con usted.
6308919	31906299	AM	3216044596	2018-11-22 10:43:24	2018-11-22 10:43:28	Sus cesantias en el FNA pueden ser la primera cuota de una casa en CALI. Quiere saber mas? SIN COSTO, responda SI o NO	Pendiente	2018-11-22	2018-11-22
6313886	31470835	AM	3127479826	2018-11-22 10:43:24	2018-11-22 10:43:28	Sus cesantias en el FNA pueden ser la primera cuota de una casa. En 2018 financiamos 9669 clientes como Ud. Quiere saber mas? SIN COSTO, responda SI o NO	Pendiente	2018-11-22	2018-11-22
6320416	73124260	AM	3174047585	2018-11-22 10:43:24	2018-11-22 10:43:28	Sus cesantias en el FNA pueden ser la primera cuota de una casa. Quiere saber mas? SIN COSTO, responda SI o NO	Pendiente	2018-11-22	2018-11-22
6330296	60314849	AM	3223576314	2018-11-22 10:43:24	2018-11-22 10:43:28	RUTH Sus cesantias en el FNA pueden ser la primera cuota de una casa. Hay subsidios disponibles, preguntelos. Quiere saber mas? SIN COSTO, responda SI o NO	Pendiente	2018-11-22	2018-11-22
6335502	1047390167	AM	3004467453	2018-11-22 10:43:24	2018-11-22 10:43:28	KEVIN Sus cesantias en el FNA pueden ser la primera cuota de una casa. Hay subsidios disponibles, preguntelos. Quiere saber mas? SIN COSTO, responda SI o NO	Pendiente	2018-11-22	2018-11-22
6351410	43498296	AM	3128081719	2018-11-22 10:43:24	2018-11-22 10:43:28	DORIS Sus cesantias en el FNA pueden ser la primera cuota de una casa. En 2018 financiamos 9669 clientes como Ud. Quiere saber mas? SIN COSTO, responda SI o NO	Pendiente	2018-11-22	2018-11-22
6359176	94462762	AM	3016621981	2018-11-22 10:43:24	2018-11-22 10:43:28	JULIAN Sus cesantias en el FNA pueden ser la primera cuota de una casa para su familia. Quiere saber mas? SIN COSTO, responda SI o NO	Pendiente	2018-11-22	2018-11-22
6361742	22129901	AM	3146726819	2018-11-22 10:43:24	2018-11-22 10:43:28	Sea propietario! Sus cesantias en el FNA pueden ser la primera cuota de una casa. Quiere saber mas? SIN COSTO, responda SI o NO	Pendiente	2018-11-22	2018-11-22
6362540	39440265	AM	3207882692	2018-11-22 10:43:24	2018-11-22 10:52:31	Sea propietario! Sus cesantias en el FNA pueden ser la primera cuota de una casa. Quiere saber mas? SIN COSTO, responda SI o NO	SI	2018-11-22	2018-11-22	Muchas gracias por su respuesta. Un asesor del fondo Nacional del Ahorro se comunicara con usted.
0	0	AM	3102218891	2018-11-22 10:43:24	2018-11-22 15:20:58	Sus cesantias en el FNA pueden ser la primera cuota de una casa. Quiere saber mas? SIN COSTO, responda SI o NO	Si me interesa	2018-11-22	2018-11-22	No entendi. Envie de nuevo SI o NO sin costo. Recuerde que con el Fondo Nacional del Ahorro esta mas cerca de ser porpietario	SI	2018-11-22	2018-11-22	Muchas gracias por su respuesta. Un asesor del fondo Nacional del Ahorro se comunicara con usted.

## Sheet: PM
IDENTIFICADOR	CEDULA	AM/PM	Celular	Fecha de Creacion	Fecha de Finalizacion	MENSAJE ENVIADO	RESPUESTA RECIBIDA	FECHA RESPUESTA RECIBIDA	Fecha de ENVIO SEGUNDO MENSAJE	SEGUNDO MENSAJE ENVIADO	SEGUNDA RESPUESTA RECIBIDA	FECHA SEGUNDA RESPUESTA RECIBIDA	Fecha de ENVIO TERCER MENSAJE	TERCER MENSAJE ENVIADO
299189	14221118	PM	3123569297	2018-11-22 14:46:54	2018-11-22 14:46:54	JOSE Sus cesantias en el FNA pueden ser la primera cuota de una casa. Quiere saber mas? SIN COSTO, responda SI o NO	Pendiente	2018-11-22 14:46:54	2018-11-22 14:46:54
299734	14239558	PM	3103205405	2018-11-22 14:46:54	2018-11-22 15:45:04	No deje pasar el tiempo. Sus cesantias en el FNA pueden ser la primera cuota de una casa. Quiere saber mas? SIN COSTO, responda SI o NO	SI	2018-11-22 14:46:54	2018-11-22 15:45:04	Muchas gracias por su respuesta. Un asesor del fondo Nacional del Ahorro se comunicara con usted.
307181	16626999	PM	3153712425	2018-11-22 14:46:54	2018-11-22 14:46:54	No deje pasar el tiempo. Sus cesantias en el FNA pueden ser la primera cuota de una casa. Quiere saber mas? SIN COSTO, responda SI o NO	Pendiente	2018-11-22 14:46:54	2018-11-22 14:46:54
307347	16643587	PM	3165242325	2018-11-22 14:46:54	2018-11-22 14:46:54	Sea propietario! Sus cesantias en el FNA pueden ser la primera cuota de una casa. Quiere saber mas? SIN COSTO, responda SI o NO	Pendiente	2018-11-22 14:46:54	2018-11-22 14:46:54
308351	16822504	PM	3321450000	2018-11-22 14:46:54	2018-11-22 14:46:54	ALBERTO Sea propietario! Sus cesantias en el FNA pueden ser la primera cuota de una casa. Quiere saber mas? SIN COSTO, responda SI o NO	Pendiente	2018-11-22 14:46:54	2018-11-22 14:46:54
322862	18122545	PM	3113555715	2018-11-22 14:46:54	2018-11-22 14:46:54	GUILLERMO Sus cesantias en el FNA pueden ser la primera cuota de una casa en PASTO. Quiere saber mas? SIN COSTO, responda SI o NO	Pendiente	2018-11-22 14:46:54	2018-11-22 14:46:54
329518	19157205	PM	3153757000	2018-11-22 14:46:54	2018-11-22 14:46:54	RUBEN Sus cesantias en el FNA pueden ser la primera cuota de una casa. En 2018 financiamos 9669 clientes como Ud. Quiere saber mas? SIN COSTO, responda SI o NO	Pendiente	2018-11-22 14:46:54	2018-11-22 14:46:54
343020	19589682	PM	3207074890	2018-11-22 14:46:54	2018-11-22 14:46:54	Sea propietario! Sus cesantias en el FNA pueden ser la primera cuota de una casa. Quiere saber mas? SIN COSTO, responda SI o NO	Pendiente	2018-11-22 14:46:54	2018-11-22 14:46:54
2958610	76318016	PM	3166554036	2018-11-22 14:46:54	2018-11-22 14:53:44	Sus cesantias en el FNA pueden ser la primera cuota de una casa. En 2018 financiamos 9669 clientes como Ud. Quiere saber mas? SIN COSTO, responda SI o NO	Si	2018-11-22 14:46:54	2018-11-22 14:53:44	Muchas gracias por su respuesta. Un asesor del fondo Nacional del Ahorro se comunicara con usted.
2964702	25287238	PM	3155602065	2018-11-22 14:46:54	2018-11-22 14:57:54	GRISSEL Sus cesantias en el FNA pueden ser la primera cuota de una casa. En 2018 financiamos 9669 clientes como Ud. Quiere saber mas? SIN COSTO, responda SI o NO	si	2018-11-22 14:46:54	2018-11-22 14:57:54	Muchas gracias por su respuesta. Un asesor del fondo Nacional del Ahorro se comunicara con usted.
2967928	8162392	PM	3015972534	2018-11-22 14:46:54	2018-11-23 19:04:30	Sus cesantias en el FNA pueden ser la primera cuota de una casa para su familia. Quiere saber mas? SIN COSTO, responda SI o NO	SI	2018-11-22 14:46:54	2018-11-23 19:04:30	Muchas gracias por su respuesta. Un asesor del fondo Nacional del Ahorro se comunicara con usted.
2968727	28892802	PM	3155639623	2018-11-22 14:46:54	2018-11-22 14:46:55	Sus cesantias en el FNA pueden ser la primera cuota de una casa. En 2018 financiamos 9669 clientes como Ud. Quiere saber mas? SIN COSTO, responda SI o NO	Pendiente	2018-11-22 14:46:54	2018-11-22 14:46:55
2976774	37862851	PM	3174388335	2018-11-22 14:46:54	2018-11-22 14:46:55	Sus cesantias en el FNA pueden ser la primera cuota de una casa. Hay subsidios disponibles, preguntelos. Quiere saber mas? SIN COSTO, responda SI o NO	Pendiente	2018-11-22 14:46:54	2018-11-22 14:46:55
2978856	91075016	PM	3158556075	2018-11-22 14:46:54	2018-11-22 14:46:55	Sus cesantias en el FNA pueden ser la primera cuota de una casa. Hay subsidios disponibles, preguntelos. Quiere saber mas? SIN COSTO, responda SI o NO	Pendiente	2018-11-22 14:46:54	2018-11-22 14:46:55
2980472	32781282	PM	3126293377	2018-11-22 14:46:54	2018-11-22 14:46:55	MARINELA Sus cesantias en el FNA pueden ser la primera cuota de una casa. Hay subsidios disponibles, preguntelos. Quiere saber mas? SIN COSTO, responda SI o NO	Pendiente	2018-11-22 14:46:54	2018-11-22 14:46:55
2991640	80180662	PM	3134546086	2018-11-22 14:46:54	2018-11-22 14:46:55	Sus cesantias en el FNA pueden ser la primera cuota de una casa. Hay subsidios disponibles, preguntelos. Quiere saber mas? SIN COSTO, responda SI o NO	Pendiente	2018-11-22 14:46:54	2018-11-22 14:46:55
2993416	36720923	PM	3126223902	2018-11-22 14:46:54	2018-11-22 14:46:55	MILENA No deje pasar el tiempo. Sus cesantias en el FNA pueden ser la primera cuota de una casa. Quiere saber mas? SIN COSTO, responda SI o NO	Pendiente	2018-11-22 14:46:54	2018-11-22 14:46:55
2994859	85162750	PM	3114036634	2018-11-22 14:46:54	2018-11-22 14:46:55	Sus cesantias en el FNA pueden ser la primera cuota de una casa. Hay subsidios disponibles, preguntelos. Quiere saber mas? SIN COSTO, responda SI o NO	Pendiente	2018-11-22 14:46:54	2018-11-22 14:46:55
3001682	78750207	PM	3014317975	2018-11-22 14:46:54	2018-11-22 14:46:55	LUIS No deje pasar el tiempo. Sus cesantias en el FNA pueden ser la primera cuota de una casa. Quiere saber mas? SIN COSTO, responda SI o NO	Pendiente	2018-11-22 14:46:54	2018-11-22 14:46:55
3002576	43802269	PM	3136058151	2018-11-22 14:46:54	2018-11-22 18:20:20	MONICA Sea propietario! Sus cesantias en el FNA pueden ser la primera cuota de una casa. Quiere saber mas? SIN COSTO, responda SI o NO	Si	2018-11-22 14:46:54	2018-11-22 18:20:20	Muchas gracias por su respuesta. Un asesor del fondo Nacional del Ahorro se comunicara con usted.
3005527	16893206	PM	3155319140	2018-11-22 14:46:54	2018-11-22 14:46:55	EDWAR Sus cesantias en el FNA pueden ser la primera cuota de una casa para su familia. Quiere saber mas? SIN COSTO, responda SI o NO	Pendiente	2018-11-22 14:46:54	2018-11-22 14:46:55
3012386	16845389	PM	3153518591	2018-11-22 14:46:54	2018-11-22 14:46:55	LUIS Sea propietario! Sus cesantias en el FNA pueden ser la primera cuota de una casa. Quiere saber mas? SIN COSTO, responda SI o NO	Pendiente	2018-11-22 14:46:54	2018-11-22 14:46:55
3018779	43751205	PM	3002984439	2018-11-22 14:46:54	2018-11-22 14:46:55	Sus cesantias en el FNA pueden ser la primera cuota de una casa. Quiere saber mas? SIN COSTO, responda SI o NO	Pendiente	2018-11-22 14:46:54	2018-11-22 14:46:55
3024050	94446609	PM	3154527880	2018-11-22 14:46:54	2018-11-22 14:46:55	Sus cesantias en el FNA pueden ser la primera cuota de una casa en CALI. Quiere saber mas? SIN COSTO, responda SI o NO	Pendiente	2018-11-22 14:46:54	2018-11-22 14:46:55
3035227	14138966	PM	3113715098	2018-11-22 14:46:54	2018-11-22 14:46:55	Sus cesantias en el FNA pueden ser la primera cuota de una casa. En 2018 financiamos 9669 clientes como Ud. Quiere saber mas? SIN COSTO, responda SI o NO	Pendiente	2018-11-22 14:46:54	2018-11-22 14:46:55
3036430	34325322	PM	3117197952	2018-11-22 14:46:54	2018-11-22 14:46:55	Sus cesantias en el FNA pueden ser la primera cuota de una casa. Quiere saber mas? SIN COSTO, responda SI o NO	Pendiente	2018-11-22 14:46:54	2018-11-22 14:46:55
3039027	60299872	PM	3142238817	2018-11-22 14:46:54	2018-11-22 14:46:55	Sus cesantias en el FNA pueden ser la primera cuota de una casa para su familia. Quiere saber mas? SIN COSTO, responda SI o NO	Pendiente	2018-11-22 14:46:54	2018-11-22 14:46:55
11345498	98415598	PM	3163600079	2018-11-22 14:46:54	2018-11-22 14:46:55	CARLOS Sus cesantias en el FNA pueden ser la primera cuota de una casa. En 2018 financiamos 9669 clientes como Ud. Quiere saber mas? SIN COSTO, responda SI o NO	Pendiente	2018-11-22 14:46:54	2018-11-22 14:46:55
11350940	94498400	PM	3137772496	2018-11-22 14:46:54	2018-11-22 14:46:55	JAVIER Sus cesantias en el FNA pueden ser la primera cuota de una casa. Hay subsidios disponibles, preguntelos. Quiere saber mas? SIN COSTO, responda SI o NO	Pendiente	2018-11-22 14:46:54	2018-11-22 14:46:55
11370013	43599398	PM	3014942060	2018-11-22 14:46:54	2018-11-22 14:46:55	AZALIA No deje pasar el tiempo. Sus cesantias en el FNA pueden ser la primera cuota de una casa. Quiere saber mas? SIN COSTO, responda SI o NO	Pendiente	2018-11-22 14:46:54	2018-11-22 14:46:55
11374787	16740671	PM	3146874213	2018-11-22 14:46:54	2018-11-22 14:46:55	Sus cesantias en el FNA pueden ser la primera cuota de una casa. Quiere saber mas? SIN COSTO, responda SI o NO	Pendiente	2018-11-22 14:46:54	2018-11-22 14:46:55
11387869	75097887	PM	3148942826	2018-11-22 14:46:54	2018-11-22 15:41:01	Sus cesantias en el FNA pueden ser la primera cuota de una casa. Hay subsidios disponibles, preguntelos. Quiere saber mas? SIN COSTO, responda SI o NO	Si	2018-11-22 14:46:54	2018-11-22 15:41:01	Muchas gracias por su respuesta. Un asesor del fondo Nacional del Ahorro se comunicara con usted.
11394115	5994851	PM	3218848713	2018-11-22 14:46:54	2018-11-22 14:52:24	RIVER Sus cesantias en el FNA pueden ser la primera cuota de una casa. En 2018 financiamos 9669 clientes como Ud. Quiere saber mas? SIN COSTO, responda SI o NO	si	2018-11-22 14:46:54	2018-11-22 14:52:24	Muchas gracias por su respuesta. Un asesor del fondo Nacional del Ahorro se comunicara con usted.
11406181	13716574	PM	3115223927	2018-11-22 14:46:54	2018-11-22 14:46:55	JOSE Sea propietario! Sus cesantias en el FNA pueden ser la primera cuota de una casa. Quiere saber mas? SIN COSTO, responda SI o NO	Pendiente	2018-11-22 14:46:54	2018-11-22 14:46:55
244916	4675371	PM	3137498116	2018-11-22 14:46:54	2018-11-22 14:46:55	Sus cesantias en el FNA pueden ser la primera cuota de una casa en POPAYAN. Quiere saber mas? SIN COSTO, responda SI o NO	Pendiente	2018-11-22 14:46:54	2018-11-22 14:46:55
250967	5450901	PM	3118093015	2018-11-22 14:46:54	2018-11-22 14:46:55	JOSE Sus cesantias en el FNA pueden ser la primera cuota de una casa. Hay subsidios disponibles, preguntelos. Quiere saber mas? SIN COSTO, responda SI o NO	Pendiente	2018-11-22 14:46:54	2018-11-22 14:46:55
254330	5883088	PM	3134032131	2018-11-22 14:46:54	2018-11-22 14:46:55	Sus cesantias en el FNA pueden ser la primera cuota de una casa. Quiere saber mas? SIN COSTO, responda SI o NO	Pendiente	2018-11-22 14:46:54	2018-11-22 14:46:55
260118	6756585	PM	3143844886	2018-11-22 14:46:54	2018-11-22 14:46:55	No deje pasar el tiempo. Sus cesantias en el FNA pueden ser la primera cuota de una casa. Quiere saber mas? SIN COSTO, responda SI o NO	Pendiente	2018-11-22 14:46:54	2018-11-22 14:46:55
260778	6768575	PM	3132775543	2018-11-22 14:46:54	2018-11-22 14:46:55	CARLOS Sus cesantias en el FNA pueden ser la primera cuota de una casa para su familia. Quiere saber mas? SIN COSTO, responda SI o NO	Pendiente	2018-11-22 14:46:54	2018-11-22 14:46:55
261033	6774799	PM	3165617888	2018-11-22 14:46:54	2018-11-22 14:46:55	SAMUEL Sus cesantias en el FNA pueden ser la primera cuota de una casa para su familia. Quiere saber mas? SIN COSTO, responda SI o NO	Pendiente	2018-11-22 14:46:54	2018-11-22 14:46:55
269462	8303736	PM	3107851878	2018-11-22 14:46:54	2018-11-22 14:46:55	MAURICIO Sus cesantias en el FNA pueden ser la primera cuota de una casa en MEDELLIN. Quiere saber mas? SIN COSTO, responda SI o NO	Pendiente	2018-11-22 14:46:54	2018-11-22 14:46:55
271076	8677349	PM	3122800217	2018-11-22 14:46:54	2018-11-22 14:46:55	Sus cesantias en el FNA pueden ser la primera cuota de una casa. Quiere saber mas? SIN COSTO, responda SI o NO	Pendiente	2018-11-22 14:46:54	2018-11-22 14:46:55
272157	8743341	PM	3003737148	2018-11-22 14:46:54	2018-11-22 14:46:55	No deje pasar el tiempo. Sus cesantias en el FNA pueden ser la primera cuota de una casa. Quiere saber mas? SIN COSTO, responda SI o NO	Pendiente	2018-11-22 14:46:54	2018-11-22 14:46:55
273831	9085835	PM	3157350544	2018-11-22 14:46:54	2018-11-22 14:46:55	Sus cesantias en el FNA pueden ser la primera cuota de una casa en CARTAGENA. Quiere saber mas? SIN COSTO, responda SI o NO	Pendiente	2018-11-22 14:46:54	2018-11-22 14:46:55
275563	9520926	PM	3107978189	2018-11-22 14:46:54	2018-11-23 22:02:39	ALVARO Sus cesantias en el FNA pueden ser la primera cuota de una casa para su familia. Quiere saber mas? SIN COSTO, responda SI o NO	Si	2018-11-22 14:46:54	2018-11-23 22:02:39	Muchas gracias por su respuesta. Un asesor del fondo Nacional del Ahorro se comunicara con usted.
278530	10224106	PM	3216425997	2018-11-22 14:46:54	2018-11-22 14:46:55	Sea propietario! Sus cesantias en el FNA pueden ser la primera cuota de una casa. Quiere saber mas? SIN COSTO, responda SI o NO	Pendiente	2018-11-22 14:46:54	2018-11-22 14:46:55
279112	10242056	PM	3122860423	2018-11-22 14:46:54	2018-11-22 14:46:55	ENRIQUE Sus cesantias en el FNA pueden ser la primera cuota de una casa para su familia. Quiere saber mas? SIN COSTO, responda SI o NO	Pendiente	2018-11-22 14:46:54	2018-11-22 14:46:55
281399	10529053	PM	3155781863	2018-11-22 14:46:54	2018-11-22 14:46:55	No deje pasar el tiempo. Sus cesantias en el FNA pueden ser la primera cuota de una casa. Quiere saber mas? SIN COSTO, responda SI o NO	Pendiente	2018-11-22 14:46:54	2018-11-22 14:46:55
281759	10535365	PM	3113400260	2018-11-22 14:46:54	2018-11-22 14:46:55	NOAK Sus cesantias en el FNA pueden ser la primera cuota de una casa en POPAYAN. Quiere saber mas? SIN COSTO, responda SI o NO	Pendiente	2018-11-22 14:46:54	2018-11-22 14:46:55
282345	10549323	PM	3156595086	2018-11-22 14:46:54	2018-11-22 14:46:55	Sus cesantias en el FNA pueden ser la primera cuota de una casa para su familia. Quiere saber mas? SIN COSTO, responda SI o NO	Pendiente	2018-11-22 14:46:54	2018-11-22 14:46:55
288172	12271958	PM	3116318214	2018-11-22 14:46:54	2018-11-22 14:46:55	CARLOS Sea propietario! Sus cesantias en el FNA pueden ser la primera cuota de una casa. Quiere saber mas? SIN COSTO, responda SI o NO	Pendiente	2018-11-22 14:46:54	2018-11-22 14:46:55
288963	12538781	PM	3002285401	2018-11-22 14:46:54	2018-11-22 14:46:55	Sus cesantias en el FNA pueden ser la primera cuota de una casa. En 2018 financiamos 9669 clientes como Ud. Quiere saber mas? SIN COSTO, responda SI o NO	Pendiente	2018-11-22 14:46:54	2018-11-22 14:46:55
293185	13064522	PM	3137676944	2018-11-22 14:46:54	2018-11-22 14:53:54	Sus cesantias en el FNA pueden ser la primera cuota de una casa. Quiere saber mas? SIN COSTO, responda SI o NO	Si	2018-11-22 14:46:54	2018-11-22 14:53:54	Muchas gracias por su respuesta. Un asesor del fondo Nacional del Ahorro se comunicara con usted.
295868	13481581	PM	3022880106	2018-11-22 14:46:54	2018-11-22 14:46:55	No deje pasar el tiempo. Sus cesantias en el FNA pueden ser la primera cuota de una casa. Quiere saber mas? SIN COSTO, responda SI o NO	Pendiente	2018-11-22 14:46:54	2018-11-22 14:46:55
450915	49768151	PM	3012788253	2018-11-22 14:46:54	2018-11-22 14:46:55	Sus cesantias en el FNA pueden ser la primera cuota de una casa en VALLEDUPAR. Quiere saber mas? SIN COSTO, responda SI o NO	Pendiente	2018-11-22 14:46:54	2018-11-22 14:46:55
460962	51916198	PM	3165151035	2018-11-22 14:46:54	2018-11-22 14:46:55	Sus cesantias en el FNA pueden ser la primera cuota de una casa. En 2018 financiamos 9669 clientes como Ud. Quiere saber mas? SIN COSTO, responda SI o NO	Pendiente	2018-11-22 14:46:54	2018-11-22 14:46:55
461990	51976824	PM	3102735280	2018-11-22 14:46:54	2018-11-22 14:46:55	ANGELA No deje pasar el tiempo. Sus cesantias en el FNA pueden ser la primera cuota de una casa. Quiere saber mas? SIN COSTO, responda SI o NO	Pendiente	2018-11-22 14:46:54	2018-11-22 14:46:55
464208	52147549	PM	3226841979	2018-11-22 14:46:54	2018-11-22 14:46:55	No deje pasar el tiempo. Sus cesantias en el FNA pueden ser la primera cuota de una casa. Quiere saber mas? SIN COSTO, responda SI o NO	Pendiente	2018-11-22 14:46:54	2018-11-22 14:46:55
467832	59814872	PM	3003441019	2018-11-22 14:46:54	2018-11-22 14:46:55	Sea propietario! Sus cesantias en el FNA pueden ser la primera cuota de una casa. Quiere saber mas? SIN COSTO, responda SI o NO	Pendiente	2018-11-22 14:46:54	2018-11-22 14:46:55
468515	60296384	PM	3138226496	2018-11-22 14:46:54	2018-11-22 14:46:55	Sus cesantias en el FNA pueden ser la primera cuota de una casa para su familia. Quiere saber mas? SIN COSTO, responda SI o NO	Pendiente	2018-11-22 14:46:54	2018-11-22 14:46:55
469520	63292367	PM	3143426330	2018-11-22 14:46:54	2018-11-22 14:46:55	NELLY Sus cesantias en el FNA pueden ser la primera cuota de una casa en BUCARAMANGA. Quiere saber mas? SIN COSTO, responda SI o NO	Pendiente	2018-11-22 14:46:54	2018-11-22 14:46:55
470170	63362910	PM	3157905233	2018-11-22 14:46:54	2018-11-22 14:46:55	Sus cesantias en el FNA pueden ser la primera cuota de una casa para su familia. Quiere saber mas? SIN COSTO, responda SI o NO	Pendiente	2018-11-22 14:46:54	2018-11-22 14:46:55
471007	65497403	PM	3172213106	2018-11-22 14:46:54	2018-11-22 14:46:55	MARIA Sea propietario! Sus cesantias en el FNA pueden ser la primera cuota de una casa. Quiere saber mas? SIN COSTO, responda SI o NO	Pendiente	2018-11-22 14:46:54	2018-11-22 14:46:55
472373	66738651	PM	3202430623	2018-11-22 14:46:54	2018-11-22 14:46:55	ALEIDA Sus cesantias en el FNA pueden ser la primera cuota de una casa. Hay subsidios disponibles, preguntelos. Quiere saber mas? SIN COSTO, responda SI o NO	Pendiente	2018-11-22 14:46:54	2018-11-22 14:46:55
472633	66863334	PM	3167428056	2018-11-22 14:46:54	2018-11-22 14:46:55	MARIA Sus cesantias en el FNA pueden ser la primera cuota de una casa. Hay subsidios disponibles, preguntelos. Quiere saber mas? SIN COSTO, responda SI o NO	Pendiente	2018-11-22 14:46:54	2018-11-22 14:46:55
474573	70119298	PM	3173098561	2018-11-22 14:46:54	2018-11-22 14:46:55	GONZALO Sea propietario! Sus cesantias en el FNA pueden ser la primera cuota de una casa. Quiere saber mas? SIN COSTO, responda SI o NO	Pendiente	2018-11-22 14:46:54	2018-11-22 14:46:55
475382	71535230	PM	3146707845	2018-11-22 14:46:54	2018-11-22 14:46:55	Sus cesantias en el FNA pueden ser la primera cuota de una casa para su familia. Quiere saber mas? SIN COSTO, responda SI o NO	Pendiente	2018-11-22 14:46:54	2018-11-22 14:46:55
477795	73084739	PM	3157548189	2018-11-22 14:46:54	2018-11-22 14:46:55	Sus cesantias en el FNA pueden ser la primera cuota de una casa. Hay subsidios disponibles, preguntelos. Quiere saber mas? SIN COSTO, responda SI o NO	Pendiente	2018-11-22 14:46:54	2018-11-22 14:46:55
479277	75078766	PM	3108223640	2018-11-22 14:46:54	2018-11-22 14:46:55	Sus cesantias en el FNA pueden ser la primera cuota de una casa en MANIZALES. Quiere saber mas? SIN COSTO, responda SI o NO	Pendiente	2018-11-22 14:46:54	2018-11-22 14:46:55
480430	77177717	PM	3114249550	2018-11-22 14:46:54	2018-11-22 14:46:55	JOSE Sus cesantias en el FNA pueden ser la primera cuota de una casa. En 2018 financiamos 9669 clientes como Ud. Quiere saber mas? SIN COSTO, responda SI o NO	Pendiente	2018-11-22 14:46:54	2018-11-22 14:46:55
489763	79474148	PM	3013852502	2018-11-22 14:46:54	2018-11-22 14:46:55	No deje pasar el tiempo. Sus cesantias en el FNA pueden ser la primera cuota de una casa. Quiere saber mas? SIN COSTO, responda SI o NO	Pendiente	2018-11-22 14:46:54	2018-11-22 14:46:55
494575	80400306	PM	3108187487	2018-11-22 14:46:54	2018-11-22 14:46:55	LUIS Sus cesantias en el FNA pueden ser la primera cuota de una casa en TUNJA. Quiere saber mas? SIN COSTO, responda SI o NO	Pendiente	2018-11-22 14:46:54	2018-11-22 14:46:55
496648	83168294	PM	3118216161	2018-11-22 14:46:54	2018-11-22 14:46:55	No deje pasar el tiempo. Sus cesantias en el FNA pueden ser la primera cuota de una casa. Quiere saber mas? SIN COSTO, responda SI o NO	Pendiente	2018-11-22 14:46:54	2018-11-22 14:46:55
500274	91340053	PM	3112664825	2018-11-22 14:46:54	2018-11-22 14:46:55	REINALDO Sus cesantias en el FNA pueden ser la primera cuota de una casa en BUCARAMANGA. Quiere saber mas? SIN COSTO, responda SI o NO	Pendiente	2018-11-22 14:46:54	2018-11-22 14:46:55
1220611	31930117	PM	3176949651	2018-11-22 14:46:54	2018-11-22 14:46:55	GLORIA Sea propietario! Sus cesantias en el FNA pueden ser la primera cuota de una casa. Quiere saber mas? SIN COSTO, responda SI o NO	Pendiente	2018-11-22 14:46:54	2018-11-22 14:46:55
1227482	38242947	PM	3128955334	2018-11-22 14:46:54	2018-11-22 14:46:55	Sea propietario! Sus cesantias en el FNA pueden ser la primera cuota de una casa. Quiere saber mas? SIN COSTO, responda SI o NO	Pendiente	2018-11-22 14:46:54	2018-11-22 14:46:55
1229510	65748490	PM	3158420188	2018-11-22 14:46:54	2018-11-22 14:46:55	Sus cesantias en el FNA pueden ser la primera cuota de una casa para su familia. Quiere saber mas? SIN COSTO, responda SI o NO	Pendiente	2018-11-22 14:46:54	2018-11-22 14:46:55
1248036	40373816	PM	3202642501	2018-11-22 14:46:54	2018-11-22 14:46:55	Sus cesantias en el FNA pueden ser la primera cuota de una casa. Quiere saber mas? SIN COSTO, responda SI o NO	Pendiente	2018-11-22 14:46:54	2018-11-22 14:46:55
1267590	14222813	PM	3112859612	2018-11-22 14:46:54	2018-11-22 14:46:55	No deje pasar el tiempo. Sus cesantias en el FNA pueden ser la primera cuota de una casa. Quiere saber mas? SIN COSTO, responda SI o NO	Pendiente	2018-11-22 14:46:54	2018-11-22 14:46:55
1310913	25707520	PM	3113083714	2018-11-22 14:46:54	2018-11-22 14:46:55	MARILU Sus cesantias en el FNA pueden ser la primera cuota de una casa. En 2018 financiamos 9669 clientes como Ud. Quiere saber mas? SIN COSTO, responda SI o NO	Pendiente	2018-11-22 14:46:54	2018-11-22 14:46:55
2677103	6801254	PM	3115418193	2018-11-22 14:46:54	2018-11-22 14:46:55	Sus cesantias en el FNA pueden ser la primera cuota de una casa para su familia. Quiere saber mas? SIN COSTO, responda SI o NO	Pendiente	2018-11-22 14:46:54	2018-11-22 14:46:55
2689752	46372642	PM	3112275268	2018-11-22 14:46:54	2018-11-22 14:46:55	Sus cesantias en el FNA pueden ser la primera cuota de una casa para su familia. Quiere saber mas? SIN COSTO, responda SI o NO	Pendiente	2018-11-22 14:46:54	2018-11-22 14:46:55
2703546	72232583	PM	3114147438	2018-11-22 14:46:54	2018-11-22 14:47:50	WALTER Sea propietario! Sus cesantias en el FNA pueden ser la primera cuota de una casa. Quiere saber mas? SIN COSTO, responda SI o NO	Si	2018-11-22 14:46:54	2018-11-22 14:47:50	Muchas gracias por su respuesta. Un asesor del fondo Nacional del Ahorro se comunicara con usted.
[truncated: 1,407 more rows]

## Sheet: Eliminados
Motivo	franja	Identificador	Cedula	Número Celular	Ciudad Domicilio	a<s	MENSAJE FINAL PM - EN TEXTO
[truncated: 4 more rows]

## Sheet: Costo
		Total Envío	Valor	Costo Total Envio Iva Incluido
[truncated: 11 more rows]
